# Supplementary material for: Photoinduced radical alkylation of aldehydes with potassium alkyltrifluoroborates
Source: Royal Society of Chemistry journal article supplement (doi:10.1039/d4qo00741g), 2024-01-01
Supplement: d4qo00741g1.pdf [file d4qo00741g1.pdf]

# Supporting Information

## Photoinduced radical alkylation of aldehydes with potassium alkyltrifluoroborates

Kirill A. Zhilyaev,<sup>a,b</sup> Mikhail O. Zubkov,<sup>a</sup> Mikhail D. Kosobokov,<sup>a</sup> Vitalij V. Levin<sup>a</sup> and Alexander D. Dilman<sup>\*a</sup>

<sup>a</sup> N. D. Zelinsky Institute of Organic Chemistry, 119991 Moscow, Leninsky prosp. 47, Russian Federation

<sup>b</sup> Lomonosov Moscow State University, Department of Chemistry, 119991, Moscow, Leninskie Gory 1-3, Russian Federation

E-mail: *adil25@mail.ru*

### Table of Contents

|                                                           | Page     |
|-----------------------------------------------------------|----------|
| General Methods                                           | S2       |
| Starting materials                                        | S3       |
| Optimization of work-up conditions                        | S4       |
| Synthesis of alcohols <b>3</b> (General procedures I-II)  | S5-S23   |
| Radical alkylation of azomethines (General procedure III) | S24-S28  |
| Unsuccessful substrates                                   | S29      |
| Additional experiments                                    | S30-S31  |
| NMR studies                                               | S32-S33  |
| UV-Vis studies                                            | S34      |
| Light on/off experiments                                  | S35-S36  |
| X-ray crystallographic data and refinement details        | S37-S43  |
| Radical trapping experiments                              | S44      |
| EPR study                                                 | S45      |
| DFT calculations                                          | S46-S61  |
| References                                                | S62-63   |
| NMR spectra                                               | S64-S158 |

## General Methods

Precoated silica gel plates F-254 were used for thin-layer analytical chromatography visualizing with UV and/or acidic aq.  $\text{KMnO}_4$  solution. High resolution mass spectra (HRMS) were measured using electrospray ionization (ESI) and time-of-flight (TOF) mass analyzer. The measurements were done in a positive ion mode (interface capillary voltage – 4500 V) or in a negative ion mode (3200 V); mass range from  $m/z$  50 to  $m/z$  3000. For irradiation, a strip of light emitting diodes smd 3528, 50 cm (3528-120LED-1M, 12 V, IP 33; 60W 400 nm) was used. Reactions were performed in a glass tube (outer diameter 12 mm, inner diameter 9 mm). The reaction tube was placed in a glass jacket cooled with water (water temperature *ca.* 20 °C), and the system was wrapped by a strip of LEDs. The distance between the reaction vessel and diodes was about 1 cm. [1]

## Starting materials

All reactions were performed under air atmosphere unless otherwise noted. Acetonitrile, ethyl acetate, 1,2-dichloroethane, toluene and dichloromethane were distilled from  $\text{CaH}_2$ . Commercial reagents and solvents were purchased in ABCR, TCI, BLDPharm, Angene Chemicals and were used without further purification unless otherwise stated.

Following compounds were prepared according to literature procedures:

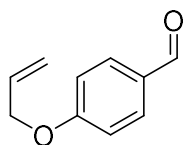

SI-1 [2]

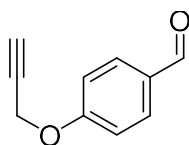

SI-2 [3]

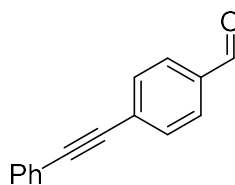

SI-3 [4]

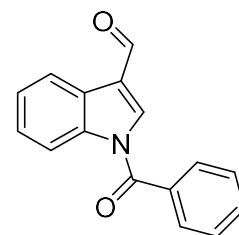

SI-4 [5]

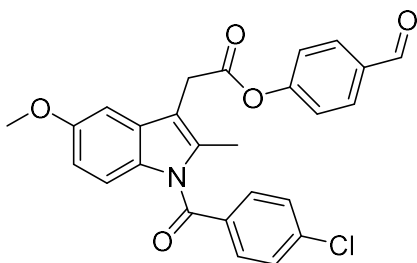

SI-5 [6]

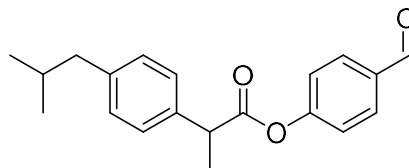

SI-6 [7]

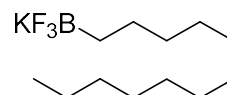

SI-7 [8]

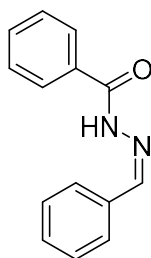

SI-8 [9]

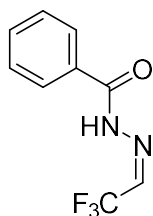

SI-9 [10]

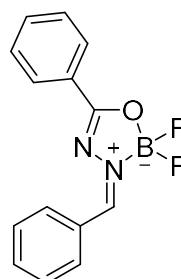

SI-10 [11]

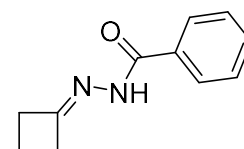

SI-11 [12]

## Optimization of work-up conditions

| additives                                                                    | time, h | 3a/3a'     |
|------------------------------------------------------------------------------|---------|------------|
| none                                                                         | 0       | 55/45      |
| sat. aq. LiOH                                                                | 18      | 14/86      |
| sat. aq. NaHCO <sub>3</sub>                                                  | 18      | 55/45      |
| 25% aq. NH <sub>4</sub> OH                                                   | 18      | 55/45      |
| sat. NH <sub>3</sub> in methanol                                             | 18      | 55/45      |
| sat. aq. KF                                                                  | 18      | 60/40      |
| sat. aq. KOH                                                                 | 2       | 97/3       |
| sat. aq. KHF <sub>2</sub>                                                    | 0.5     | 100/0 (98) |
| aq. FeCl <sub>3</sub> (5 mol.%)<br>imidazole (4 equiv)<br>mannitol (1 equiv) | 18      | 100/0 (92) |

**Table S1.** Hydrolysis studies. <sup>a</sup> Relative amount of **3a** and **3a'** by <sup>1</sup>H NMR (**3a**+**3a'**=100) was determined by <sup>1</sup>H NMR. <sup>b</sup> <sup>1</sup>H NMR yields of **3a** in parenthesis (determined by using CH<sub>2</sub>Br<sub>2</sub> as an internal standard).

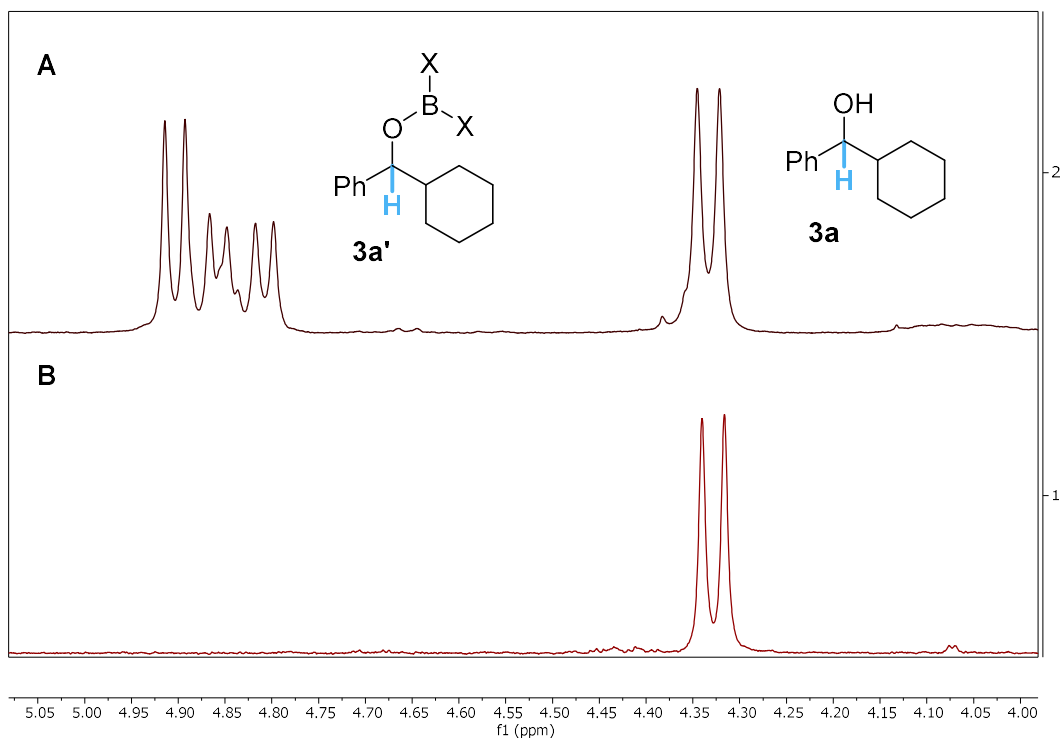

**Figure S1.** A. <sup>1</sup>H NMR spectrum of reaction mixture before workup. B. <sup>1</sup>H NMR spectrum of crude after KHF<sub>2</sub> workup.

## Synthesis of alcohols **3a-o**, **3r-u**, **3w-ai** (General procedure I)

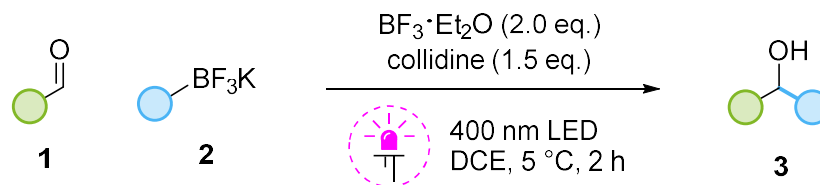

A tube equipped with an argon outlet (*Note 1*) and a stirring bar was charged with solid potassium alkyltrifluoroborate **2** (2.0 equiv, 1.0 mmol) followed by dry 1,2-dichloroethane (2 mL), aldehyde **1** (1.0 equiv, 0.5 mmol) and 2,4,6-collidine (1.5 equiv, 0.75 mmol, 99  $\mu\text{L}$ ) under inert atmosphere. Then, the reaction mixture was cooled to 5 °C and boron trifluoride etherate (2.0 equiv, 1.0 mmol, 123  $\mu\text{L}$ ) was added with microsyringe in one portion. The mixture was irradiated by 400 nm LEDs at 5 °C (60W LEDs for 2 hours for **3a-o**, **3r-u**, **3w-z**; 5W LEDs for 18 hours for **3aa-ai**). The solvent was evaporated under reduced pressure, the residue was dissolved in methanol (2 mL)

For compounds **3a-3e**, **3g**, **3h**, **3k-o**, **3t**, **3z**, **3aa-3ai**, aqueous saturated solution of  $\text{KHF}_2$  (0.5 mL) was added to the resulting methanol solution with cooling at room temperature water bath (*Note 2*). The mixture was stirred for 30 minutes at room temperature, diluted with water (5 mL), and extracted with diethyl ether (3 $\times$ 5 mL) (*Note 3*). The combined organic layers were filtered through  $\text{Na}_2\text{SO}_4$ , concentrated under reduced pressure, and the residue was purified by column chromatography on silica gel.

For compounds **3f**, **3i**, **3j**, **3r**, **3s**, **3u-y**, aqueous solution of  $\text{FeCl}_3$  (5 mol%, 0.025 mmol, 4 mg in 0.5 mL) was added to the resulting methanol solution followed by addition of solid imidazole (4.0 equiv, 2.0 mmol, 136 mg) and mannitol (1.0 equiv, 0.5 mmol, 91 mg). The resulting light brown cloudy suspension was stirred overnight at room temperature, diluted with water (5 mL), and extracted with diethyl ether (3 $\times$ 5 mL) (*Note 3*). The combined organic layers were filtered through  $\text{Na}_2\text{SO}_4$ , concentrated under reduced pressure, and the residue was purified by column chromatography on silica gel.

**Note 1:** The reaction can be set up under air without noticeable yield loss due to the excess of trifluoroborate. However, the heavy byproduct alcohol stemming from the oxidation of trifluoroborate may sometimes interfere isolation.

**Note 2:** Under the standard reaction conditions, the resulting alcohol **3** was partially bound in mixed boronic esters, which were surprisingly resistant to hydrolysis. The conditions for its complete quenching were found after some optimizations and literature search (see Table S1).

**Note 3:** Sticky white precipitate formed in some cases meddled phase separation. It can be conveniently removed by placing the reaction tube on a centrifuge (2000 rpm, 1 min).

## Synthesis of alcohols **3p**, **3q**, **3v** (General procedure II)

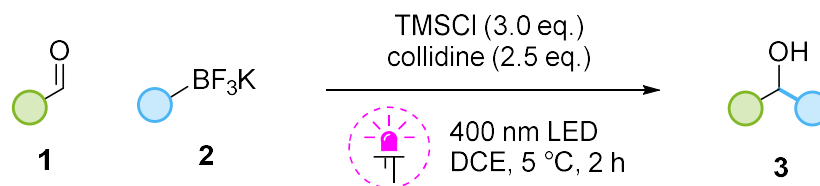

A tube equipped with an argon outlet (*Note 1*) and a stirring bar was charged with dry 1,2-dichloroethane (2 mL), aldehyde **1** (1.0 equiv, 0.5 mmol) and 2,4,6-collidine (2.5 equiv, 1.25 mmol, 165  $\mu$ L) under inert atmosphere. Then, trimethylsilyl chloride (3.0 equiv, 1.5 mmol, 190  $\mu$ L) was added and the reaction was stirred for 30 min at room temperature. The reaction mixture was cooled to 5 °C and solid potassium alkyltrifluoroborate **2** (2.0 equiv, 1 mmol) was added in one portion. The mixture was irradiated by 60W 400 nm LEDs for 2 hours at 5 °C. For the work-up, aqueous saturated solution of  $\text{KHF}_2$  (0.5 mL) was added to the reaction mixture with cooling at room temperature water bath (*Note 2*). The mixture was stirred for 30 minutes at room temperature, diluted with water (5 mL), and extracted with diethyl ether (3 $\times$ 5 mL). The combined organic layers were filtered through  $\text{Na}_2\text{SO}_4$ , concentrated under reduced pressure, and the residue was purified by column chromatography on silica gel.

**Note 1:** The reaction can be set up under air without noticeable yield loss due to the excess of trifluoroborate. However, the heavy byproduct alcohol stemming from borate oxidation may sometimes interfere isolation.

**Note 2:** Under the standard reaction conditions, the resulting alcohol **3** was partially bound in mixed boronic esters, which were surprisingly resistant to hydrolysis. The conditions for its complete quenching were found after some optimizations and literature search (see Table SI-1).

**Cyclohexyl(phenyl)methanol (3a).** [13]

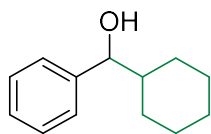

Yield 90 mg (95%). Colorless oil.

Chromatography: EtOAc/PE, 1/5.  $R_f$  0.33.

$^1\text{H}$  NMR (300 MHz, Chloroform-*d*)  $\delta$  7.39 – 7.20 (m, 5H), 4.36 (dd,  $J = 7.2, 2.3$  Hz, 1H), 2.04 – 1.95 (m, 1H), 1.87 (d,  $J = 2.3$  Hz, 1H), 1.83 – 1.53 (m, 4H), 1.44 – 0.85 (m, 6H).

$^{13}\text{C}\{^1\text{H}\}$  NMR (76 MHz, Chloroform-*d*)  $\delta$  143.6, 128.1, 127.4, 126.6, 79.3, 44.9, 29.3, 28.8, 26.4, 26.1, 26.0.

**[1,1'-Biphenyl]-4-yl(cyclohexyl)methanol (3b).** [14]

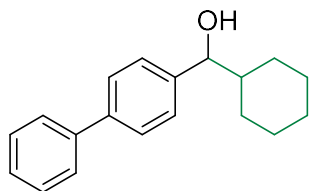

Yield 129 mg (97%). Colorless crystals. Mp 107-109 °C (CHCl<sub>3</sub>).

Chromatography: EtOAc/PE, 1/5.  $R_f$  0.28.

$^1\text{H}$  NMR (300 MHz, Chloroform-*d*)  $\delta$  7.67 – 7.55 (m, 4H), 7.52 – 7.43 (m, 2H), 7.42 – 7.33 (m, 3H), 4.42 (d,  $J = 7.1$  Hz, 1H), 2.14 (s, 1H), 2.09 – 2.01 (m, 1H), 1.86 – 1.59 (m, 4H), 1.55 – 1.41 (m, 1H), 1.36 – 0.91 (m, 5H).

$^{13}\text{C}\{^1\text{H}\}$  NMR (76 MHz, Chloroform-*d*)  $\delta$  142.6, 140.8, 140.2, 128.7, 127.1, 127.0, 127.0, 126.8, 79.0, 44.9, 29.2, 28.8, 26.4, 26.1, 26.0.

**(4-Bromophenyl)(cyclohexyl)methanol (3c).** [15]

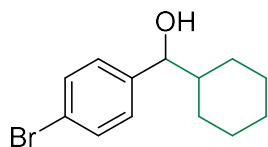

Yield 131 mg (97%). Colorless crystals. Mp 70-72 °C (CHCl<sub>3</sub>).

Chromatography: EtOAc/PE, 1/5.  $R_f$  0.30.

$^1\text{H}$  NMR (300 MHz, Chloroform-*d*)  $\delta$  7.44 (d,  $J = 8.4$  Hz, 2H), 7.15 (d,  $J = 8.4$  Hz, 2H), 4.31 (d,  $J = 6.9$  Hz, 1H), 2.06 (s, 1H), 1.95 – 1.86 (m, 1H), 1.81 – 1.47 (m, 4H), 1.42 – 1.33 (m, 1H), 1.29 – 0.78 (m, 5H).

$^{13}\text{C}\{^1\text{H}\}$  NMR (76 MHz, Chloroform-*d*)  $\delta$  142.5, 131.2, 128.3, 121.0, 78.6, 44.9, 29.1, 28.6, 26.3, 26.0, 25.9.

### Cyclohexyl(3-iodophenyl)methanol (3d).

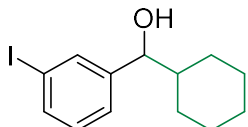

Yield 142 mg (90%). Colorless oil.

Chromatography: EtOAc/PE, 1/5.  $R_f$  0.31.

$^1\text{H}$  NMR (300 MHz, Chloroform-*d*)  $\delta$  7.63 (t,  $J = 1.5$  Hz, 1H), 7.58 (dt,  $J = 7.7, 1.5$  Hz, 1H), 7.21 (dt,  $J = 7.7, 1.5$  Hz, 1H), 7.05 (t,  $J = 7.7$  Hz, 1H), 4.25 (d,  $J = 6.9$  Hz, 1H), 2.28 (s, 1H), 1.95 – 1.83 (m, 1H), 1.80 – 1.48 (m, 4H), 1.44 – 1.30 (m, 1H), 1.28 – 0.72 (m, 5H).

$^{13}\text{C}\{^1\text{H}\}$  NMR (76 MHz, Chloroform-*d*)  $\delta$  145.9, 136.3, 135.5, 129.9, 125.8, 94.2, 78.4, 44.8, 29.1, 28.4, 26.3, 25.9, 25.86.

HRMS (ESI): calcd for  $\text{C}_{13}\text{H}_{21}\text{INO}$  ( $\text{M}+\text{NH}_4$ ) 334.0662, found 334.0663, calcd for  $\text{C}_{13}\text{H}_{17}\text{IONa}$  ( $\text{M}+\text{Na}$ ) 339.0216, found 339.0218.

### Cyclohexyl(2,6-dichlorophenyl)methanol (3e).

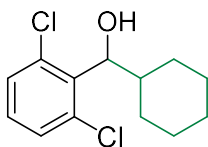

Yield 92 mg (71%). Colorless crystals. Mp 96-98 °C ( $\text{CDCl}_3$ ).

Chromatography: EtOAc/PE, 1/10.  $R_f$  0.23.

$^1\text{H}$  NMR (300 MHz, Chloroform-*d*)  $\delta$  7.30 (d,  $J = 8.5$  Hz, 1H), 7.31 (d,  $J = 7.6$  Hz, 1H), 7.13 (dd,  $J = 8.5, 7.6$  Hz, 1H), 5.09 (t,  $J = 10.0$  Hz, 1H), 2.79 (d,  $J = 10.2$  Hz, 1H), 2.37 – 2.10 (m, 2H), 1.89 – 1.80 (m, 1H), 1.74 – 1.59 (m, 2H), 1.40 – 0.93 (m, 6H).

$^{13}\text{C}\{^1\text{H}\}$  NMR (76 MHz, Chloroform-*d*)  $\delta$  137.4, 134.8, 129.7, 128.7, 76.7, 42.4, 30.4, 29.0, 26.3, 26.0, 25.8.



HRMS (ESI): calcd for  $C_{13}H_{16}^{35}Cl^{35}ClONa$  (M+Na) 281.0470, found 281.0468, calcd for  $C_{13}H_{16}^{35}Cl^{37}ClONa$  (M+Na) 283.0441, found 283.0439, calcd for  $C_{13}H_{16}^{37}Cl^{37}ClONa$  (M+Na) 285.0412, found 285.0429.

**(2-Bromophenyl)(cyclohexyl)methanol (3f).**

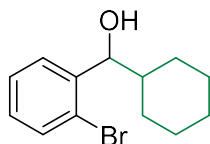

Yield 109 mg (81%). Colorless crystals. Mp 97-99 °C ( $CHCl_3$ ).

Chromatography: EtOAc/PE, 1/5.  $R_f$  0.40.

$^1H$  NMR (300 MHz, Chloroform-*d*)  $\delta$  7.51 (dd,  $J = 7.8, 1.3$  Hz, 1H), 7.46 (dd,  $J = 7.7, 1.8$  Hz, 1H), 7.31 (td,  $J = 7.7, 1.3$  Hz, 1H), 7.10 (td,  $J = 7.8, 1.8$  Hz, 1H), 4.85 (dd,  $J = 6.3, 3.0$  Hz, 1H), 2.19 (d,  $J = 3.0$  Hz, 1H), 1.93 – 1.59 (m, 5H), 1.43 (d,  $J = 2.5$  Hz, 1H), 1.33 – 0.93 (m, 5H).

$^{13}C\{^1H\}$  NMR (76 MHz, Chloroform-*d*)  $\delta$  142.6, 132.5, 128.5, 128.4, 127.3, 122.7, 76.95, 43.9, 29.5, 27.5, 26.3, 26.3, 26.0.

HRMS (ESI): calcd for  $C_{13}H_{17}^{79}BrONa$  (M+Na) 291.0355, found 291.0359, calcd for  $C_{13}H_{17}^{81}BrONa$  (M+Na) 293.0335, found 293.0347.

**Cyclohexyl(perfluorophenyl)methanol (3g).** [16]

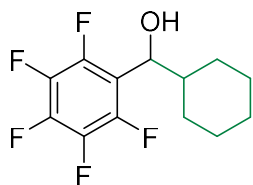

Yield 92 mg (66%). Colorless crystals. Mp 75-77 °C ( $CHCl_3$ ).

Chromatography: EtOAc/PE, 1/5.  $R_f$  0.42.

$^1H$  NMR (300 MHz, Chloroform-*d*)  $\delta$  4.69 (t,  $J = 8.5$  Hz, 1H), 2.23 (d,  $J = 8.5$  Hz, 1H), 2.20 – 2.11 (m, 1H), 1.91 – 1.56 (m, 4H), 1.39 – 0.79 (m, 6H).

$^{13}C\{^1H\}$  NMR (76 MHz, Chloroform-*d*)  $\delta$  144.7 (dm,  $J = 245.2$  Hz), 140.3 (dm,  $J = 253.6$  Hz), 137.5 (dm,  $J = 253.1$  Hz), 116.5 (tm,  $J = 15.7$  Hz), 71.4, 43.4, 29.7, 28.9, 26.1, 25.6, 25.5.

$^{19}F$  NMR (282 MHz, Chloroform-*d*)  $\delta$  -142.9 (dd,  $J = 22.6, 8.5$  Hz, 2F), -155.5 (tt,  $J = 20.7, 1.3$  Hz, 1F), -161.9 – -162.2 (m, 2F).

**Cyclohexyl(4-methoxyphenyl)methanol (3h).** [17]

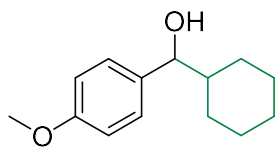

Yield 96 mg (87%). Colorless crystals. Mp 87-89 °C (CHCl<sub>3</sub>).

Chromatography: EtOAc/PE, 1/5. R<sub>f</sub> 0.27.

<sup>1</sup>H NMR (300 MHz, Chloroform-*d*) δ 7.20 (d, *J* = 8.2 Hz, 2H), 6.86 (d, *J* = 8.2 Hz, 2H), 4.27 (d, *J* = 7.4 Hz, 1H), 3.79 (s, 3H), 2.09 – 1.89 (m, 2H), 1.84 – 1.49 (m, 4H), 1.45 – 0.77 (m, 6H).

<sup>13</sup>C {<sup>1</sup>H} NMR (76 MHz, Chloroform-*d*) δ 158.8, 135.8, 127.7, 113.5, 78.9, 55.2, 44.88, 29.2, 29.0, 26.4, 26.0, 25.9.

**Cyclohexyl(2,3-dihydrobenzo[*b*][1,4]dioxin-6-yl)methanol (3i).**

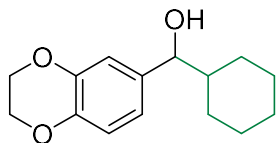

Yield 104 mg (84%). Colorless oil.

Chromatography: EtOAc/PE, 1/5. R<sub>f</sub> 0.15.

<sup>1</sup>H NMR (300 MHz, Chloroform-*d*) δ 6.80 (d, *J* = 8.2 Hz, 1H), 6.79 (d, *J* = 2.0 Hz, 1H), 6.74 (dd, *J* = 8.2, 2.0 Hz, 1H), 4.22 (s, 4H), 4.21 (d, *J* = 7.4 Hz, 1H), 1.99 (s, 1H), 2.04 – 1.91 (m, 1H), 1.86 – 1.45 (m, 4H), 1.42 – 1.30 (m, 1H), 1.30 – 0.79 (m, 5H).

<sup>13</sup>C {<sup>1</sup>H} NMR (76 MHz, Chloroform-*d*) δ 143.1, 142.7, 137.1, 119.6, 116.8, 115.4, 78.8, 64.3, 64.3, 44.8, 29.2, 29.0, 26.4, 26.0, 25.9.

HRMS (ESI): calcd for C<sub>15</sub>H<sub>20</sub>O<sub>3</sub>Na (M+Na) 271.1305, found 271.1308, calcd for C<sub>15</sub>H<sub>20</sub>OK (M+K) 287.1044, found 287.1031.

***N*-(4-[cyclohexyl{hydroxy}methyl]phenyl)acetamide (3j).**

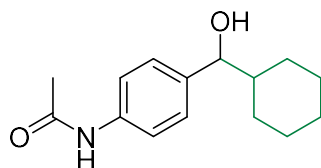

Prepared according to General procedure I, with the addition of saturated aqueous NaHSO<sub>3</sub> (1 mL) solution on the extraction step to get rid of unreacted aldehyde.

Yield 51 mg (41%). Colorless crystals. Mp 174-176 °C (CHCl<sub>3</sub>).

Chromatography: MeOH/CH<sub>2</sub>Cl<sub>2</sub>, 1/20. R<sub>f</sub> 0.23.

<sup>1</sup>H NMR (300 MHz, Methanol-*d*<sub>4</sub>) δ 7.50 (d, *J* = 8.1 Hz, 2H), 7.22 (d, *J* = 8.1 Hz, 2H), 4.25 (d, *J* = 7.3 Hz, 1H), 3.31 (s, 1H), 2.11 (s, 3H), 2.06 – 1.95 (m, 1H), 1.81 – 1.47 (m, 4H), 1.39 – 0.82 (m, 6H).

<sup>13</sup>C{<sup>1</sup>H} NMR (76 MHz, Methanol-*d*<sub>4</sub>) δ 171.5, 141.1, 138.7, 128.2, 120.8, 79.7, 46.3, 30.4, 30.3, 27.6, 27.2, 27.2, 23.8.

HRMS (ESI): calcd for C<sub>15</sub>H<sub>22</sub>NO<sub>2</sub> (M+H) 248.1645, found 248.1643, calcd for C<sub>15</sub>H<sub>21</sub>NO<sub>2</sub>Na (M+Na) 270.1465, found 270.1461, calcd for C<sub>15</sub>H<sub>21</sub>NO<sub>2</sub>K 286.1204, found 286.1195.

#### 4-(Cyclohexyl[hydroxy]methyl)phenyl acetate (3k). [18]

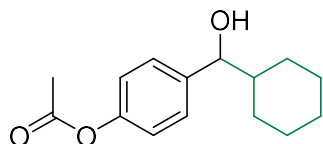

Yield 103 mg (83%). Colorless crystals. Mp 56-58 °C (CHCl<sub>3</sub>).

Chromatography: EtOAc/PE, 1/5. R<sub>f</sub> 0.15.

<sup>1</sup>H NMR (300 MHz, Chloroform-*d*) δ 7.29 (d, *J* = 8.5 Hz, 2H), 7.05 (d, *J* = 8.5 Hz, 2H), 4.34 (d, *J* = 7.1 Hz, 1H), 2.29 (s, 3H), 2.28 (s, 1H), 2.03 – 1.88 (m, 1H), 1.84 – 1.51 (m, 4H), 1.47 – 1.34 (m, 1H), 1.32 – 0.85 (m, 5H).

<sup>13</sup>C{<sup>1</sup>H} NMR (76 MHz, Chloroform-*d*) δ 169.5, 149.7, 141.1, 127.5, 121.0, 78.6, 44.8, 29.1, 28.6, 26.3, 26.0, 25.9, 21.0.

#### Cyclohexyl(4-[trifluoromethyl]phenyl)methanol (3l). [19]

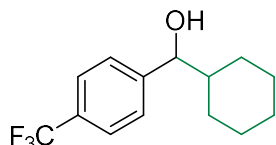

Yield 115 mg (89%). Colorless crystals. Mp 73-75 °C (CHCl<sub>3</sub>).

Chromatography: EtOAc/PE, 1/10. R<sub>f</sub> 0.16.

<sup>1</sup>H NMR (300 MHz, Chloroform-*d*) δ 7.58 (d, *J* = 8.1 Hz, 2H), 7.39 (d, *J* = 8.1 Hz, 2H), 4.42 (dd, *J* = 6.8, 2.8 Hz, 1H), 2.24 (d, *J* = 2.8 Hz, 1H), 1.95 – 1.83 (m, 1H), 1.81 – 1.51 (m, 4H), 1.46 – 1.33 (m, 1H), 1.29 – 0.80 (m, 5H).

<sup>13</sup>C{<sup>1</sup>H} NMR (76 MHz, Chloroform-*d*) δ 147.5 (q, *J* = 1.4 Hz), 129.5 (q, *J* = 32.2 Hz), 126.9, 125.0 (q, *J* = 3.8 Hz), 124.2 (q, *J* = 271.9 Hz), 78.6, 45.0, 29.2, 28.4, 26.3, 26.0, 25.9.

<sup>19</sup>F NMR (282 MHz, Chloroform-*d*) δ -62.4.

**Methyl 4-(cyclohexyl[hydroxy]methyl)benzoate(3m).** [18]

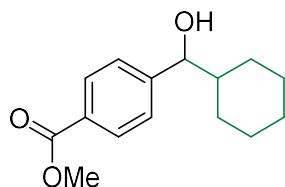

Yield 114 mg (92%). Colorless crystals. Mp 94-96 °C (CHCl<sub>3</sub>).

Chromatography: EtOAc/PE, 1/5. R<sub>f</sub> 0.17.

<sup>1</sup>H NMR (300 MHz, Chloroform-*d*) δ 7.92 (d, *J* = 8.3 Hz, 2H), 7.30 (d, *J* = 8.3 Hz, 2H), 4.38 (d, *J* = 6.6 Hz, 1H), 3.85 (s, 3H), 2.62 (s, 1H), 1.92 – 1.78 (m, 1H), 1.79 – 1.48 (m, 4H), 1.42 – 1.28 (m, 1H), 1.25 – 0.79 (m, 5H).

<sup>13</sup>C {<sup>1</sup>H} NMR (76 MHz, Chloroform-*d*) δ 167.0, 148.9, 129.3, 128.8, 126.5, 78.5, 51.9, 44.9, 29.1, 28.3, 26.2, 25.9, 25.9.

**4-(Cyclohexyl[hydroxy]methyl)benzonitrile (3n).** [19]

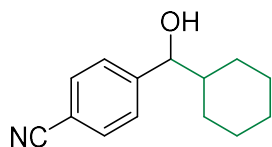

Yield 93 mg (86%). Colorless crystals. Mp 55-57 °C (CHCl<sub>3</sub>).

Chromatography: EtOAc/PE, 1/5. R<sub>f</sub> 0.10.

<sup>1</sup>H NMR (300 MHz, Chloroform-*d*) δ 7.56 (d, *J* = 8.3 Hz, 2H), 7.38 (d, *J* = 8.3 Hz, 2H), 4.42 (d, *J* = 6.4 Hz, 1H), 2.50 (s, 1H), 1.88 – 1.46 (m, 5H), 1.44 – 1.30 (m, 1H), 1.25 – 0.84 (m, 5H).

<sup>13</sup>C {<sup>1</sup>H} NMR (76 MHz, Chloroform-*d*) δ 149.0, 131.8, 127.2, 118.8, 110.6, 78.1, 44.9, 29.1, 28.0, 26.1, 25.9, 25.8.

**1,4-Phenylenebis(cyclohexylmethanol) (3o).**

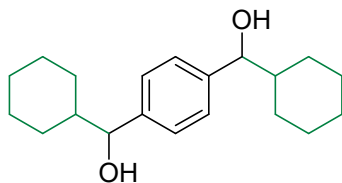

Yield 132 mg (87%). Colorless crystals. Mp 130-132 °C (CHCl<sub>3</sub>).

Chromatography: EtOAc/PE, 1/5. R<sub>f</sub> 0.29.

<sup>1</sup>H NMR (300 MHz, Chloroform-*d*) δ 7.34 – 7.15 (m, 4H), 4.32 (d, *J* = 7.2 Hz, 2H), 2.11 – 1.91 (m, 4H), 1.86 – 1.49 (m, 8H), 1.40 – 0.74 (m, 12H).

$^{13}\text{C}\{^1\text{H}\}$  NMR (76 MHz, Chloroform-*d*)  $\delta$  142.7, 126.4, 79.1, 79.1, 44.9, 29.3, 28.8, 26.4, 26.0, 26.0.

HRMS (ESI): calcd for  $\text{C}_{20}\text{H}_{34}\text{O}_2\text{N}$  ( $\text{M}+\text{NH}_4$ ) 320.2584, found 320.2582, calcd for  $\text{C}_{20}\text{H}_{30}\text{O}_2\text{Na}$  ( $\text{M}+\text{Na}$ ) 325.2138, found 325.2141, calcd for  $\text{C}_{20}\text{H}_{30}\text{O}_2\text{K}$  ( $\text{M}+\text{K}$ ) 341.1877, found 341.1869.

#### 4-(Cyclohexyl[hydroxy]methyl)phenol (3p).

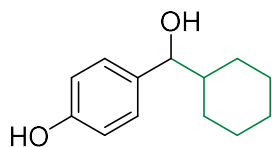

Yield 83 mg (80%). Colorless crystals. Mp 120-122 °C ( $\text{CDCl}_3$ ).

Chromatography: EtOAc/PE, 1/2.  $R_f$  0.28.

$^1\text{H}$  NMR (300 MHz,  $\text{DMSO}-d_6$ )  $\delta$  9.16 (s, 1H), 7.04 (d,  $J = 8.4$  Hz, 2H), 6.69 (d,  $J = 8.4$  Hz, 2H), 4.84 (d,  $J = 4.2$  Hz, 1H), 4.10 (dd,  $J = 6.8, 4.2$  Hz, 1H), 1.99 – 1.81 (m, 1H), 1.78 – 1.51 (m, 3H), 1.46 – 1.24 (m, 2H), 1.23 – 0.76 (m, 5H).

$^{13}\text{C}\{^1\text{H}\}$  NMR (76 MHz,  $\text{DMSO}-d_6$ )  $\delta$  156.0, 135.3, 127.6, 114.4, 76.9, 45.0, 29.0, 28.6, 26.2, 25.8, 25.7.

HRMS (ESI): calcd for  $\text{C}_{13}\text{H}_{18}\text{O}_2\text{Na}$  ( $\text{M}+\text{Na}$ ) 229.1199, found 229.1208.

#### 4-(Cyclohexyl[hydroxy]methyl)benzoic acid (3q).

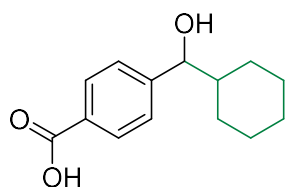

Yield 104 mg (89%). Colorless crystals. Mp 168-170 °C (Methanol).

Chromatography: EtOAc/PE, 1/1.  $R_f$  0.20.

$^1\text{H}$  NMR (300 MHz, Methanol-*d*<sub>4</sub>)  $\delta$  8.00 (d,  $J = 8.3$  Hz, 2H), 7.41 (d,  $J = 8.3$  Hz, 2H), 4.40 (d,  $J = 6.9$  Hz, 1H), 2.09 – 1.51 (m, 5H), 1.49 – 0.86 (m, 7H).

$^{13}\text{C}\{^1\text{H}\}$  NMR (76 MHz, Methanol-*d*<sub>4</sub>)  $\delta$  169.9, 150.9, 130.6, 130.5, 127.8, 79.5, 46.3, 30.5, 29.9, 27.6, 27.2, 27.2.

HRMS (ESI): calcd for  $\text{C}_{14}\text{H}_{18}\text{O}_3\text{Na}$  ( $\text{M}+\text{Na}$ ) 257.1148, found 257.1146.

**(4-[Allyloxy]phenyl)(cyclohexyl)methanol (3r).**

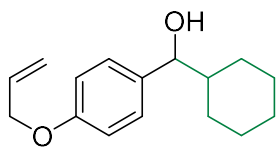

Yield 78 mg (63%). Colorless oil.

Chromatography: EtOAc/PE, 1/5.  $R_f$  0.31.

$^1\text{H}$  NMR (300 MHz, Chloroform-*d*)  $\delta$  7.19 (d,  $J = 8.6$  Hz, 2H), 6.87 (d,  $J = 8.7$  Hz, 2H), 6.06 (ddt,  $J = 17.3, 10.5, 5.3$  Hz, 1H), 5.41 (dq,  $J = 17.3, 1.5$  Hz, 1H), 5.28 (dq,  $J = 10.5, 1.5$  Hz, 1H), 4.52 (dt,  $J = 5.3, 1.5$  Hz, 2H), 4.27 (d,  $J = 7.4$  Hz, 1H), 2.08 – 1.92 (m, 2H), 1.86 – 1.70 (m, 1H), 1.72 – 1.48 (m, 3H), 1.42 – 1.26 (m, 1H), 1.29 – 0.74 (m, 5H).

$^{13}\text{C}\{^1\text{H}\}$  NMR (76 MHz, Chloroform-*d*)  $\delta$  157.9, 136.0, 133.3, 127.7, 117.5, 114.3, 78.9, 68.7, 44.9, 29.2, 29.0, 26.4, 26.0, 25.9.

HRMS (ESI): calcd for  $\text{C}_{16}\text{H}_{22}\text{O}_2\text{Na}$  ( $\text{M}+\text{Na}$ ) 269.1512, found 269.1507.

**Cyclohexyl(4-[prop-2-yn-1-yloxy]phenyl)methanol (3s).**

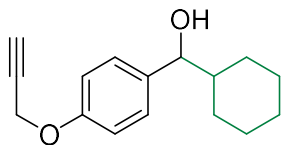

Yield 86 mg (70%). Colorless oil.

Chromatography: EtOAc/PE, 1/5.  $R_f$  0.21.

$^1\text{H}$  NMR (300 MHz, Chloroform-*d*)  $\delta$  7.21 (d,  $J = 8.7$  Hz, 2H), 6.93 (d,  $J = 8.7$  Hz, 2H), 4.67 (d,  $J = 2.4$  Hz, 2H), 4.29 (d,  $J = 7.3$  Hz, 1H), 2.52 (t,  $J = 2.4$  Hz, 1H), 2.05 – 1.89 (m, 2H), 1.82 – 1.49 (m, 4H), 1.41 – 0.77 (m, 6H).

$^{13}\text{C}\{^1\text{H}\}$  NMR (76 MHz, Chloroform-*d*)  $\delta$  156.8, 136.7, 127.7, 114.5, 78.8, 78.6, 75.5, 55.8, 44.9, 29.2, 29.0, 26.4, 26.0, 25.9.

HRMS (ESI): calcd for  $\text{C}_{16}\text{H}_{20}\text{O}_2\text{Na}$  ( $\text{M}+\text{Na}$ ) 267.1356, found 267.1364, calcd for  $\text{C}_{16}\text{H}_{20}\text{O}_2\text{K}$  ( $\text{M}+\text{K}$ ) 283.1095, found 283.1084.

**Cyclohexyl(4-[phenylethynyl]phenyl)methanol (3t).**

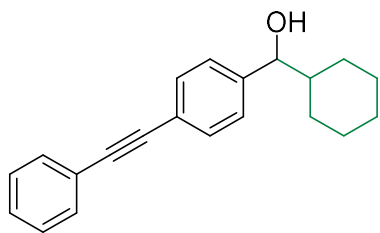

Yield 123 mg (85%). Colorless crystals. Mp 95-97 °C (CHCl<sub>3</sub>).

Chromatography: EtOAc/PE, 1/5. R<sub>f</sub> 0.32.

<sup>1</sup>H NMR (300 MHz, Chloroform-*d*) δ 7.63 – 7.50 (m, 4H), 7.42 – 7.34 (m, 3H), 7.30 (d, *J* = 8.0 Hz, 2H), 4.39 (d, *J* = 6.9 Hz, 1H), 2.17 (s, 1H), 2.02 – 1.91 (m, 1H), 1.86 – 1.56 (m, 4H), 1.52 – 1.38 (m, 1H), 1.35 – 0.89 (m, 5H).

<sup>13</sup>C {<sup>1</sup>H} NMR (76 MHz, Chloroform-*d*) δ 143.8, 131.5, 131.3, 128.3, 128.1, 126.6, 123.2, 122.10, 89.3, 89.2, 78.9, 44.9, 29.1, 28.6, 26.3, 26.0, 25.9.

HRMS (ESI): calcd for C<sub>21</sub>H<sub>26</sub>ON (M+NH<sub>4</sub>) 308.2009, found 308.2010, calcd for C<sub>21</sub>H<sub>22</sub>ONa (M+Na) 313.1563, found 313.1564, calcd for C<sub>21</sub>H<sub>22</sub>OK (M+K) 329.1302, found 329.1299.

**(3-[Cyclohexyl{hydroxy}methyl]-1H-indol-1-yl)(phenyl)methanone (3u).**

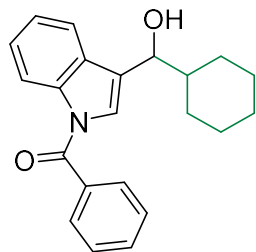

Yield 43 mg (26%). Dark yellow oil.

Chromatography: EtOAc/PE, 1/3. R<sub>f</sub> 0.26.

<sup>1</sup>H NMR (300 MHz, Chloroform-*d*) δ 8.39 (d, *J* = 8.2 Hz, 1H), 7.77 – 7.65 (m, 3H), 7.65 – 7.46 (m, 3H), 7.45 – 7.28 (m, 2H), 7.22 (s, 1H), 4.65 (d, *J* = 7.0 Hz, 1H), 2.08 – 1.40 (m, 7H), 1.34 – 0.89 (m, 5H).

<sup>13</sup>C {<sup>1</sup>H} NMR (76 MHz, Chloroform-*d*) δ 168.5, 136.7, 134.6, 131.9, 129.2, 129.1, 128.6, 125.1, 124.6, 124.4, 123.8, 120.2, 116.6, 73.0, 43.7, 29.6, 28.7, 26.3, 26.1, 25.9.

HRMS (ESI): calcd for C<sub>22</sub>H<sub>23</sub>NO<sub>2</sub>Na (M+Na) 356.1621, found 356.1609, calcd for C<sub>22</sub>H<sub>23</sub>NO<sub>2</sub>K (M+K) 372.1360, found 372.1356.

**Cyclohexyl(5-[hydroxymethyl]furan-2-yl)methanol (3v).**

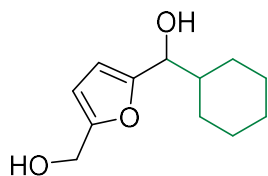

Yield 54 mg (51%). Colorless crystals. Mp 93-95 °C (CHCl<sub>3</sub>).

Chromatography: EtOAc/PE, 1/1. R<sub>f</sub> 0.37.

<sup>1</sup>H NMR (300 MHz, Chloroform-*d*) δ 6.17 (d, *J* = 3.1 Hz, 1H), 6.10 (d, *J* = 3.1 Hz, 1H), 4.49 (s, 2H), 4.28 (d, *J* = 7.6 Hz, 1H), 3.03 (s, 1H), 2.79 (s, 1H), 2.10 – 1.86 (m, 1H), 1.83 – 1.54 (m, 4H), 1.50 – 1.36 (m, 1H), 1.34 – 0.80 (m, 5H).

<sup>13</sup>C {<sup>1</sup>H} NMR (76 MHz, Chloroform-*d*) δ 156.0, 153.2, 108.2, 107.3, 72.6, 57.3, 42.6, 29.1, 28.8, 26.3, 25.9, 25.8.

HRMS (ESI): calcd for C<sub>12</sub>H<sub>22</sub>O<sub>3</sub>N (M+NH<sub>4</sub>) 228.1594, found 228.1602, calcd for C<sub>12</sub>H<sub>18</sub>O<sub>3</sub>Na (M+Na) 233.1148, found 233.1151, calcd for C<sub>12</sub>H<sub>18</sub>O<sub>3</sub>K (M+K) 249.0888, found 249.0894.

**Benzofuran-2-yl(cyclohexyl)methanol (3w). [20]**

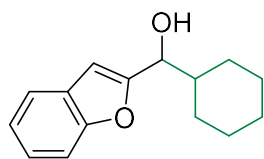

Yield 81 mg (70%). Yellow oil.

Chromatography: EtOAc/PE, 1/5. R<sub>f</sub> 0.27.

<sup>1</sup>H NMR (300 MHz, Chloroform-*d*) δ 7.59 – 7.54 (m, 1H), 7.53 – 7.45 (m, 1H), 7.35 – 7.19 (m, 2H), 6.62 (s, 1H), 4.55 (dd, *J* = 6.9, 5.0 Hz, 1H), 2.34 (d, *J* = 5.2 Hz, 1H), 2.09 – 1.65 (m, 5H), 1.62 – 1.51 (m, 1H), 1.40 – 1.01 (m, 5H).

<sup>13</sup>C {<sup>1</sup>H} NMR (76 MHz, Chloroform-*d*) δ 158.7, 154.6, 128.1, 123.9, 122.7, 120.8, 111.2, 103.3, 73.1, 42.7, 29.1, 28.4, 26.3, 25.9, 25.8.

**(5-Bromothiophen-2-yl)(cyclohexyl)methanol (3x).**

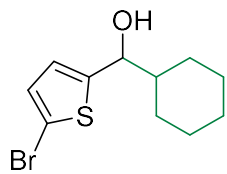

Yield 107 mg (78%). Yellow oil.



Chromatography: EtOAc/PE, 1/10.  $R_f$  0.20.

$^1\text{H}$  NMR (300 MHz, Chloroform-*d*)  $\delta$  6.88 (d,  $J = 3.7$  Hz, 1H), 6.65 (dd,  $J = 3.7, 0.8$  Hz, 1H), 4.50 (dd,  $J = 7.2, 2.7$  Hz, 1H), 2.35 (d,  $J = 2.7$  Hz, 1H), 2.09 – 1.86 (m, 1H), 1.83 – 1.45 (m, 5H), 1.37 – 0.81 (m, 5H).

$^{13}\text{C}\{^1\text{H}\}$  NMR (76 MHz, Chloroform-*d*)  $\delta$  149.3, 129.1, 124.5, 111.1, 75.3, 45.3, 29.1, 28.7, 26.2, 25.87, 25.8.

HRMS (ESI): calcd for  $\text{C}_{11}\text{H}_{15}^{79}\text{BrOSNa}$  ( $\text{M}+\text{Na}$ ) 296.9919, found 296.9907, calcd for  $\text{C}_{11}\text{H}_{15}^{81}\text{BrOSNa}$  ( $\text{M}+\text{Na}$ ) 298.9899, found 298.9893.

### Benzo[*b*]thiophen-2-yl(cyclohexyl)methanol (3y). [21]

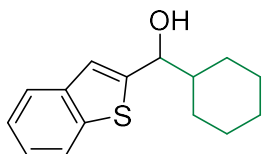

Yield 91 mg (74%). Colorless crystals. Mp 87-89 °C ( $\text{CHCl}_3$ ).

Chromatography: EtOAc/PE, 1/5.  $R_f$  0.25.

$^1\text{H}$  NMR (300 MHz, Chloroform-*d*)  $\delta$  7.81 (d,  $J = 7.0$  Hz, 1H), 7.72 (dd,  $J = 7.0, 1.9$  Hz, 1H), 7.41 – 7.25 (m, 2H), 7.14 (s, 1H), 4.68 (dd,  $J = 7.2, 3.5$  Hz, 1H), 2.39 (d,  $J = 3.5$  Hz, 1H), 2.11 – 1.99 (m, 1H), 1.85 – 1.63 (m, 4H), 1.61 – 1.50 (m, 1H), 1.36 – 0.96 (m, 5H).

$^{13}\text{C}\{^1\text{H}\}$  NMR (76 MHz, Chloroform-*d*)  $\delta$  148.3, 139.3, 139.3, 124.1, 124.0, 123.3, 122.4, 120.8, 75.6, 45.1, 29.2, 28.6, 26.3, 25.9, 25.8.

### 4-(Cyclohexyl[hydroxy]methyl)phenyl 2-(4-isobutylphenyl)propanoate (3z).

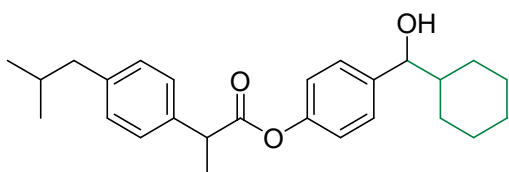

Yield 85 mg (43%). Colorless crystals. Mp 71-73 °C ( $\text{CHCl}_3$ ).

Chromatography: EtOAc/PE, 1/5.  $R_f$  0.23.

$^1\text{H}$  NMR (300 MHz, Chloroform-*d*)  $\delta$  7.34 (d,  $J = 8.1$  Hz, 2H), 7.28 (d,  $J = 8.5$  Hz, 2H), 7.18 (d,  $J = 8.1$  Hz, 2H), 7.00 (d,  $J = 8.5$  Hz, 2H), 4.36 (d,  $J = 7.1$  Hz, 1H), 3.97 (q,  $J = 7.1$  Hz, 1H), 2.52 (d,  $J = 7.1$  Hz, 2H), 2.20 – 1.49 (m, 6H), 1.64 (d,  $J = 7.1$  Hz, 3H), 1.46 – 0.81 (m, 7H), 0.96 (d,  $J = 6.6$  Hz, 6H).

$^{13}\text{C}\{^1\text{H}\}$  NMR (76 MHz, Chloroform-*d*)  $\delta$  173.2, 149.9, 141.0, 140.7, 137.2, 129.4, 127.4, 127.1, 121.0, 78.6, 45.2, 45.0, 44.9, 30.1, 29.1, 28.7, 26.3, 26.0, 25.9, 22.3, 18.4.

HRMS (ESI): calcd for  $\text{C}_{26}\text{H}_{38}\text{O}_3\text{N}$  ( $\text{M}+\text{NH}_4$ ) 412.2846, found 412.2841, calcd for  $\text{C}_{26}\text{H}_{34}\text{O}_3\text{Na}$  ( $\text{M}+\text{Na}$ ) 417.2400, found 417.2395, calcd for  $\text{C}_{26}\text{H}_{34}\text{O}_3\text{K}$  ( $\text{M}+\text{K}$ ) 433.2140, found 433.2133.

**4-(Cyclohexyl[hydroxy]methyl)phenyl 2-(1-[4-chlorobenzoyl]-5-methoxy-2-methyl-1*H*-indol-3-yl)acetate (3aa).**

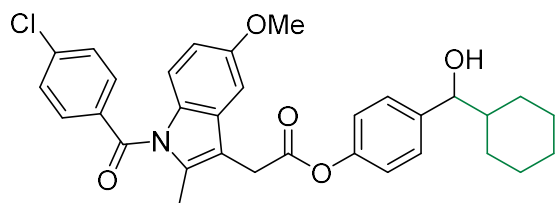

Yield 126 mg (46%). Colorless crystals. Mp 156-158 °C ( $\text{CHCl}_3$ ).

.Chromatography: EtOAc/PE, 1/2.  $R_f$  0.34.

$^1\text{H}$  NMR (300 MHz, Chloroform-*d*)  $\delta$  7.67 (d,  $J = 8.5$  Hz, 2H), 7.47 (d,  $J = 8.5$  Hz, 2H), 7.28 (d,  $J = 8.5$  Hz, 2H), 7.06 (d,  $J = 2.5$  Hz, 1H), 7.03 (d,  $J = 8.5$  Hz, 2H), 6.89 (d,  $J = 9.0$  Hz, 1H), 6.69 (dd,  $J = 9.0, 2.5$  Hz, 1H), 4.36 (d,  $J = 7.0$  Hz, 1H), 3.90 (s, 2H), 3.84 (s, 3H), 2.45 (s, 3H), 2.02 – 1.88 (m, 1H), 1.83 – 1.49 (m, 5H), 1.45 – 1.30 (m, 1H), 1.31 – 0.79 (m, 5H).

$^{13}\text{C}\{^1\text{H}\}$  NMR (76 MHz, Chloroform-*d*)  $\delta$  169.3, 168.3, 156.1, 149.8, 141.3, 139.3, 136.2, 133.8, 131.2, 130.8, 130.5, 129.1, 127.6, 121.0, 115.0, 112.0, 111.8, 101.2, 78.7, 55.7, 44.96, 30.6, 29.2, 28.6, 26.3, 26.0, 25.9, 13.4.

HRMS (ESI): calcd for  $\text{C}_{32}\text{H}_{33}^{35}\text{ClNO}_5$  ( $\text{M}+\text{H}$ ) 546.2042, found 546.2040, calcd for  $\text{C}_{32}\text{H}_{36}^{35}\text{ClN}_2\text{O}_5$  ( $\text{M}+\text{NH}_4$ ) 563.2307, found 563.2306, calcd for  $\text{C}_{32}\text{H}_{32}^{35}\text{ClNO}_5\text{Na}$  ( $\text{M}+\text{Na}$ ) 568.1861, found 568.1866, calcd for  $\text{C}_{32}\text{H}_{32}^{35}\text{ClNO}_5\text{K}$  ( $\text{M}+\text{K}$ ) 584.1601, found 584.1609.

**1-Phenylpentan-1-ol (3ab).** [22]

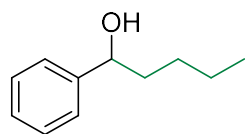

Yield 43 mg (52%). Colorless oil.

Chromatography: EtOAc/PE, 1/5.  $R_f$  0.19.

$^1\text{H}$  NMR (300 MHz, Chloroform-*d*)  $\delta$  7.45 – 7.23 (m, 5H), 4.67 (dd,  $J = 7.4, 5.9$  Hz, 1H), 2.02 (s, 1H), 1.89 – 1.64 (m, 2H), 1.51 – 1.19 (m, 4H), 0.92 (t,  $J = 7.0$  Hz, 3H).

$^{13}\text{C}\{^1\text{H}\}$  NMR (76 MHz, Chloroform-*d*)  $\delta$  144.9, 128.4, 127.4, 125.9, 74.6, 38.8, 27.9, 22.6, 14.0.

**1-Phenyltridecan-1-ol (3ac).** [23]

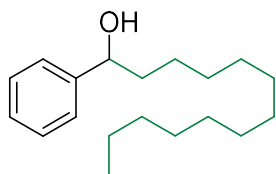

Yield 68 mg (49%). Colorless oil.

Chromatography: EtOAc/PE, 1/10.  $R_f$  0.2.

$^1\text{H}$  NMR (300 MHz, Chloroform-*d*)  $\delta$  7.50 – 7.22 (m, 5H), 4.68 (dd,  $J = 7.5, 5.8$  Hz, 1H), 1.96 (s, 1H), 1.89 – 1.66 (m, 2H), 1.52 – 1.15 (m, 20H), 0.92 (t,  $J = 6.7$  Hz, 1H).

$^{13}\text{C}\{^1\text{H}\}$  NMR (76 MHz, Chloroform-*d*)  $\delta$  144.9, 128.4, 127.4, 125.9, 74.7, 39.1, 31.9, 29.64, 29.62, 29.57, 29.53, 29.51, 29.3, 25.8, 22.7, 14.1.

**1,3-Diphenylpropan-1-ol (3ad).** [24]

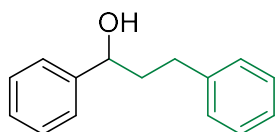

Yield 56 mg (53%). Colorless oil.

Chromatography: EtOAc/PE, 1/10.  $R_f$  0.08.

$^1\text{H}$  NMR (300 MHz, Chloroform-*d*)  $\delta$  7.45 – 7.30 (m, 7H), 7.29 – 7.20 (m, 3H), 4.72 (dd,  $J = 7.8, 5.4$  Hz, 1H), 2.88 – 2.63 (m, 2H), 2.28 – 1.98 (m, 3H).

$^{13}\text{C}\{^1\text{H}\}$  NMR (76 MHz, Chloroform-*d*)  $\delta$  144.5, 141.7, 128.5, 128.4, 128.3, 127.6, 125.9, 125.8, 73.8, 40.4, 32.0.

**1,2-Diphenylethan-1-ol (3ae).** [25]

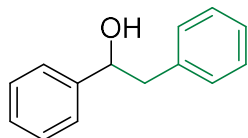

Yield 66 mg (67%). Colorless crystals. Mp 61-63 °C (CHCl<sub>3</sub>).

Chromatography: EtOAc/PE, 1/5.  $R_f$  0.24.

$^1\text{H}$  NMR (300 MHz, Chloroform-*d*)  $\delta$  7.46 – 7.19 (m, 10H), 4.93 (ddd,  $J = 7.9, 5.3, 2.2$  Hz, 1H), 3.10 (dd,  $J = 13.6, 5.3$  Hz, 1H), 3.04 (dd,  $J = 13.6, 7.9$  Hz, 1H), 2.14 (d,  $J = 2.2$  Hz, 1H).

$^{13}\text{C}\{^1\text{H}\}$  NMR (76 MHz, Chloroform-*d*)  $\delta$  143.76, 137.99, 129.46, 128.41, 128.32, 127.52, 126.52, 125.85, 75.25, 45.99.

**2-Iodo-1-phenylethan-1-ol (3af).** [26]

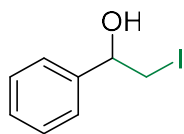

Yield 63 mg (51%). Colorless oil.

Chromatography: EtOAc/PE, 1/5.  $R_f$  0.32.

$^1\text{H}$  NMR (300 MHz, Chloroform-*d*)  $\delta$  7.45 – 7.27 (m, 5H), 4.84 (dd,  $J = 8.8, 3.7$  Hz, 1H), 3.50 (dd,  $J = 10.3, 3.7$  Hz, 1H), 3.41 (dd,  $J = 10.3, 8.8$  Hz, 1H), 2.49 (s, 1H).

$^{13}\text{C}\{^1\text{H}\}$  NMR (76 MHz, Chloroform-*d*)  $\delta$  141.1, 128.7, 128.4, 125.7, 74.0, 15.3.

**2-Methyl-1-phenylbutan-1-ol [dr = 2/3] (3ag).** [27,28]

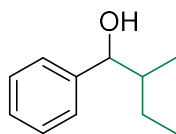

Yield 41 mg (50%). Colorless oil.

Chromatography: EtOAc/PE, 1/10.  $R_f$  0.15.

$^1\text{H}$  NMR (300 MHz, Chloroform-*d*)  $\delta$  7.45 – 7.25 (m, 5H), [4.78 (d,  $J = 8.1$  Hz) + 4.76 (d,  $J = 8.3$  Hz) 1H], 1.88 (s, 1H), 1.83 – 1.66 (m, 2H), 1.61 – 1.46 (m, 1H), 1.04 – 0.93 (m, 6H).

$^{13}\text{C}\{^1\text{H}\}$  NMR (76 MHz, Chloroform-*d*)  $\delta$  145.2, 128.4, 127.5, 125.8, 72.8, 48.3, 24.8, 23.1, 22.2.

**Cyclopentyl(phenyl)methanol (3ah).** [29]

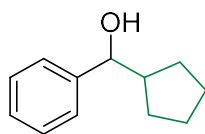

Yield 44 mg (50%). Colorless oil.

Chromatography: EtOAc/PE, 1/10.  $R_f$  0.13.

$^1\text{H}$  NMR (300 MHz, Chloroform-*d*)  $\delta$  7.46 – 7.23 (m, 5H), 4.42 (d,  $J = 8.4$  Hz, 1H), 2.35 – 2.17 (m, 1H), 2.10 (s, 1H), 2.00 – 1.85 (m, 1H), 1.79 – 1.47 (m, 5H), 1.47 – 1.34 (m, 1H), 1.30 – 1.07 (m, 1H).

$^{13}\text{C}\{^1\text{H}\}$  NMR (76 MHz, Chloroform-*d*)  $\delta$  144.4, 128.3, 127.5, 126.5, 79.1, 47.6, 29.5, 29.4, 25.5, 25.3.

**Cycloheptyl(phenyl)methanol (3ai).** [30]

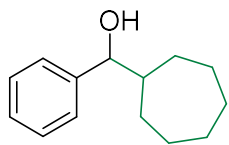

Yield 53 mg (52%). Colorless oil.

Chromatography: EtOAc/PE, 1/10.  $R_f$  0.18.

$^1\text{H}$  NMR (300 MHz, Chloroform-*d*)  $\delta$  7.45 – 7.23 (m, 5H), 4.48 (d,  $J = 6.5$  Hz, 1H), 2.09 – 1.80 (m, 3H), 1.80 – 1.30 (m, 10H), 1.28 – 1.12 (m, 1H).

$^{13}\text{C}\{^1\text{H}\}$  NMR (76 MHz, Chloroform-*d*)  $\delta$  143.8, 128.1, 127.2, 126.6, 79.1, 46.2, 31.0, 29.2, 28.4, 28.3, 26.7, 26.5.

### 1-Cyclohexyl-3-phenylpropan-1-ol (**3aj**). [15]

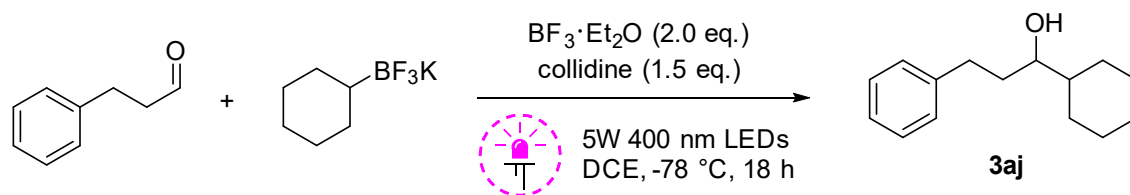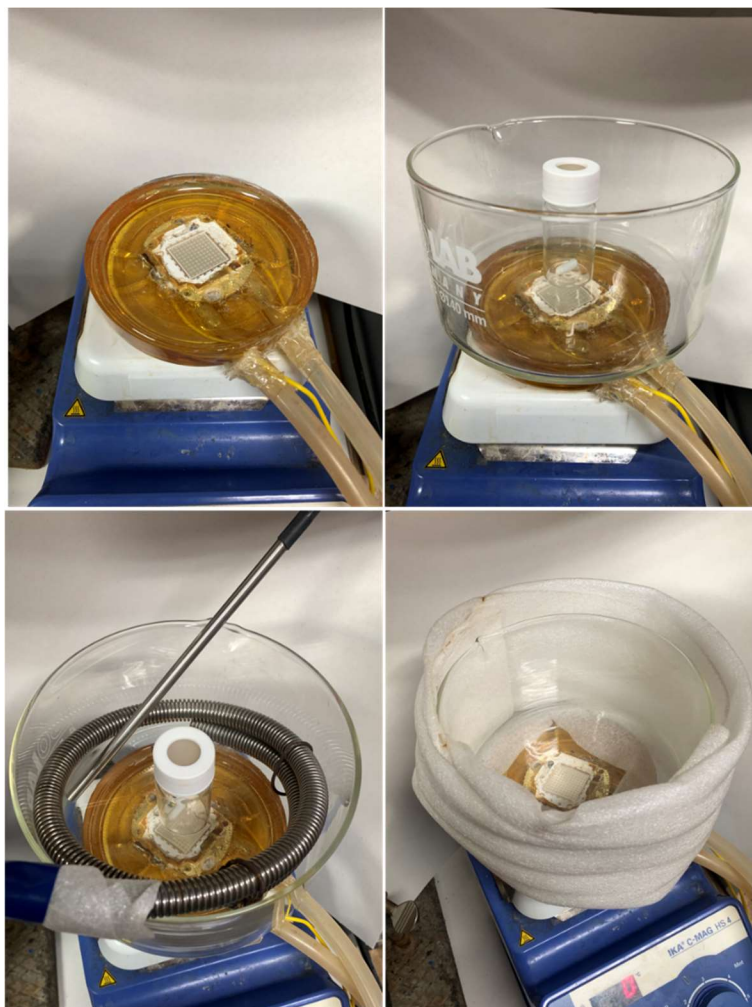

**Figure S2.** Low temperature photoreaction setup. The reaction at -78 °C was performed using the immersion cooler Huber TC100E. LED-chip was cooled to 20 °C via separate water line.

A 10 ml screw-cap tube equipped with argon/vacuum outlet, magnetic stirring bar and rubber septum was charged with solid potassium cyclohexyltrifluoroborate **2a** (2.0 equiv, 1.0 mmol, 190 mg), then evacuated and refilled with argon 3 times. Then, dry 1,2-dichloroethane (2 mL) was added and the reaction mixture was cooled to -78 °C using Huber TC100E thermostat. Hydrocinnamic aldehyde (1.0 equiv, 0.5 mmol, 67 mg) and boron trifluoride etherate (2.0 equiv,

1.0 mmol, 123  $\mu$ L) were added successively, and the cloudy mixture was stirred for 18 hours at  $-78$   $^{\circ}$ C under 5W 400 nm LED irradiation. For the workup, methanol (2 mL) and aqueous saturated solution of  $\text{KHF}_2$  (0.5 mL) were added to reaction vial at  $-78$   $^{\circ}$ C (*Note 1*). The mixture was warmed up and stirred for 30 min at room temperature. Then, the mixture was diluted with additional 5 mL of water containing a small amount of aqueous solution of hydroxylamine (100 $\mu$ L, 50% aq). The product was extracted by diethyl ether (3 $\times$ 5 mL), the combined organic phases were dried over  $\text{Na}_2\text{SO}_4$ , concentrated under reduced pressure, and the residue was purified by column chromatography on silica gel.

Yield 39 mg (58%). Colorless crystals. Mp 85-87  $^{\circ}$ C ( $\text{CHCl}_3$ ).

Chromatography: EtOAc/PE, 1/5.  $R_f$  0.30.

$^1\text{H}$  NMR (300 MHz, Chloroform-*d*)  $\delta$  7.46 – 7.09 (m, 5H), 3.49 – 3.36 (m, 1H), 2.88 (ddd,  $J = 13.7, 10.0, 5.5$  Hz, 1H), 2.68 (ddd,  $J = 13.7, 9.8, 6.7$  Hz, 1H), 1.95 – 1.62 (m, 7H), 1.43 (s, 1H), 1.41 – 0.95 (m, 6H).

$^{13}\text{C}\{^1\text{H}\}$  NMR (76 MHz, Chloroform-*d*)  $\delta$  142.4, 128.4, 128.3, 125.7, 75.6, 43.8, 35.9, 32.4, 29.2, 27.8, 26.5, 26.3, 26.2.

**Note 1:** Following the General procedure I, the same reaction was initially conducted at 5  $^{\circ}$ C and a mixture of products was obtained. The crude material was subjected to column chromatography (EtOAc/PE, 1/5) and 4 overlapping fractions were collected. Solvent was evaporated and each fraction was analyzed by  $^1\text{H}$  NMR and GS-MS. Yields of byproducts were calculated from  $^1\text{H}$  NMR data and fraction weights.

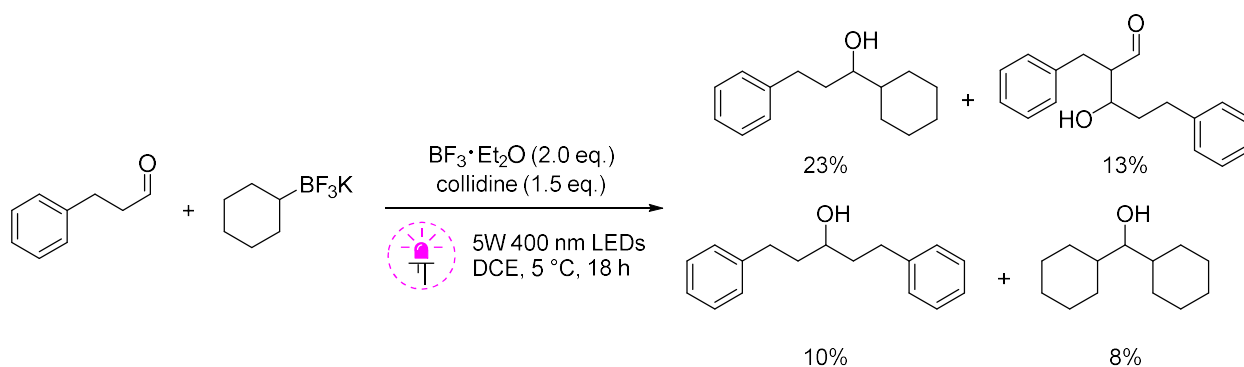

**Scheme S1.** Aliphatic aldehyde reaction at 5  $^{\circ}$ C.

## Radical alkylation of azomethines (General procedure III)

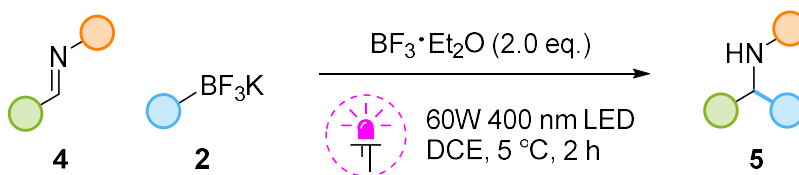

A tube equipped with an argon outlet and a stirring bar was charged with solid potassium cyclohexyltrifluoroborate **2a** (2.0 equiv, 1.0 mmol, 190 mg) and azomethine **4** (1.0 equiv, 0.5 mmol), followed by dry 1,2-dichloroethane (2 mL) under inert atmosphere. The reaction mixture was cooled to 5 °C and boron trifluoride etherate (2.0 equiv, 1.0 mmol, 123  $\mu$ L) was added with microsyringe in one portion. The mixture was irradiated by 60W 400 nm LEDs for 2 hours at 5 °C. Then, the solvent was evaporated under reduced pressure and the residue was dissolved in methanol (2 mL). Aqueous saturated solution of KF (0.5 mL) was added to the reaction mixture with cooling at room temperature water bath. The mixture was stirred for 30 minutes at room temperature. The reaction was diluted with water (5 mL), extracted with diethyl ether (3 $\times$ 5 mL), the combined organic phases were filtered through Na<sub>2</sub>SO<sub>4</sub>, concentrated under reduced pressure, and the residue was purified by column chromatography on silica gel.

### 1-Cyclohexyl-*N*-methyl-1-phenylmethanamine (**5a**). [31]

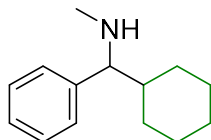

Yield 65 mg (64%). Yellow oil.

Chromatography: EtOAc/PE, 1/5 (1% Et<sub>3</sub>N). R<sub>f</sub> 0.14.

<sup>1</sup>H NMR (300 MHz, Chloroform-*d*)  $\delta$  7.39 – 7.20 (m, 5H), 3.24 (d, *J* = 7.1 Hz, 1H), 2.24 (s, 3H), 2.04 – 1.89 (m, 1H), 1.84 – 1.72 (m, 1H), 1.70 – 1.36 (m, 5H), 1.34 – 0.78 (m, 5H).

<sup>13</sup>C {<sup>1</sup>H} NMR (76 MHz, Chloroform-*d*)  $\delta$  142.5, 128.0, 128.0, 126.7, 71.1, 44.0, 34.7, 30.3, 29.8, 26.5, 26.3, 26.3.



**Methyl 2-(cyclohexyl[phenyl]methyl)hydrazine-1-carboxylate (5b).**

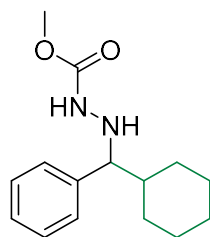

Yield 45 mg (34%). Yellow oil.

Chromatography: EtOAc/PE, 1/2 (1% Et<sub>3</sub>N). R<sub>f</sub> 0.30.

<sup>1</sup>H NMR (300 MHz, Chloroform-*d*) δ 7.38 – 7.23 (m, 5H), 5.97 (s, 1H), 4.41 (s, 1H), 3.82 (s, 1H), 3.67 (s, 3H), 2.02 – 1.89 (m, 1H), 1.84 – 1.73 (m, 1H), 1.72 – 1.53 (m, 3H), 1.51 – 1.39 (m, 1H), 1.37 – 1.00 (m, 5H), 0.96 – 0.77 (m, 1H).

<sup>13</sup>C {<sup>1</sup>H} NMR (76 MHz, Chloroform-*d*) δ 157.6, 140.8, 128.4, 128.1, 127.2, 69.9, 52.3, 42.0, 30.0, 29.2, 26.4, 26.1, 26.1.

HRMS (ESI): calcd for C<sub>15</sub>H<sub>23</sub>N<sub>2</sub>O<sub>2</sub> (M+H) 263.1754, found 263.1755, calcd for C<sub>15</sub>H<sub>22</sub>N<sub>2</sub>O<sub>2</sub>Na (M+Na) 285.1573, found 285.1577.

**N'-(Cyclohexyl[phenyl]methyl)benzohydrazide (5c). [11]**

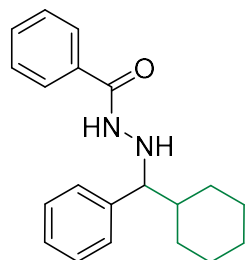

Yield 130 mg (84%). Colorless crystals. Mp 139-141 °C (CH<sub>2</sub>Cl<sub>2</sub>).

Chromatography: EtOAc/PE, 1/5 (1% Et<sub>3</sub>N). R<sub>f</sub> 0.24.

<sup>1</sup>H NMR (300 MHz, Chloroform-*d*) δ 7.56 – 7.49 (m, 2H), 7.49 – 7.40 (m, 1H), 7.39 – 7.27 (m, 7H), 5.40 (s, 1H), 3.85 (d, *J* = 7.5 Hz, 1H), 2.11 – 1.98 (m, 1H), 1.87 – 1.56 (m, 4H), 1.51 – 1.40 (m, 1H), 1.38 – 1.04 (m, 4H), 0.99 – 0.80 (m, 1H).

<sup>13</sup>C {<sup>1</sup>H} NMR (76 MHz, Chloroform-*d*) δ 166.9, 140.9, 132.9, 131.5, 128.4, 128.1, 127.2, 126.7, 70.3, 42.2, 29.9, 29.2, 26.3, 26.0.

***N'*-(Cyclohexyl[4-nitrophenyl]methyl)acetohydrazide (5d).**

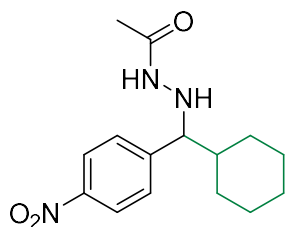

Yield 86 mg (59%). Yellow oil.

Chromatography: isopropanol/CH<sub>2</sub>Cl<sub>2</sub>, 1/10 (1% Et<sub>3</sub>N). R<sub>f</sub> 0.43.

<sup>1</sup>H NMR (300 MHz, Chloroform-*d*) δ 8.12 (d, *J* = 8.7 Hz, 2H), 7.45 (d, *J* = 8.7 Hz, 2H), 6.98 (d, *J* = 5.3 Hz, 1H), 5.07 (d, *J* = 5.3 Hz, 1H), 3.89 (d, *J* = 6.8 Hz, 1H), 1.95 – 1.85 (m, 1H), 1.81 (s, 3H), 1.79 – 1.70 (m, 1H), 1.70 – 1.54 (m, 3H), 1.49 – 1.34 (m, 1H), 1.33 – 0.96 (m, 4H), 0.90 – 0.72 (m, 1H).

<sup>13</sup>C {<sup>1</sup>H} NMR (76 MHz, Chloroform-*d*) δ 169.6, 149.1, 147.1, 129.2, 123.2, 69.6, 42.2, 29.8, 28.9, 26.1, 26.0, 25.9, 21.0.

HRMS (ESI): calcd for C<sub>15</sub>H<sub>22</sub>N<sub>3</sub>O<sub>3</sub> (M+H) 292.1656, found 292.1668, calcd for C<sub>15</sub>H<sub>21</sub>N<sub>3</sub>O<sub>3</sub>Na (M+Na) 314.1475, found 314.1480.

**2-([4-Chlorophenyl](cyclohexyl)methyl)amino)isoindoline-1,3-dione (5e).**

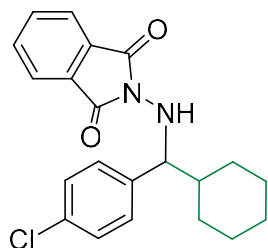

Yield 92 mg (50%). Colorless crystals. Mp 108-110 °C (CDCl<sub>3</sub>).

Chromatography: EtOAc/PE, 1/2 (1% Et<sub>3</sub>N). R<sub>f</sub> 0.46.

<sup>1</sup>H NMR (300 MHz, Chloroform-*d*) δ 7.77 – 7.69 (m, 2H), 7.72 – 7.61 (m, 2H), 7.30 (d, *J* = 8.6 Hz, 2H), 7.21 (d, *J* = 8.5 Hz, 2H), 4.84 (s, 1H), 4.24 (d, *J* = 6.5 Hz, 1H), 2.12 – 1.97 (m, 1H), 1.89 – 1.57 (m, 4H), 1.58 – 1.46 (m, 1H), 1.37 – 1.03 (m, 4H), 0.95 – 0.76 (m, 1H).

<sup>13</sup>C {<sup>1</sup>H} NMR (76 MHz, Chloroform-*d*) δ 166.7, 137.4, 134.0, 133.3, 130.0, 129.9, 128.0, 123.2, 68.2, 42.1, 30.1, 29.0, 26.2, 25.9, 25.9.

HRMS (ESI): calcd for  $C_{21}H_{22}^{35}ClN_2O_2$  (M+H) 369.1364, found 369.1350, calcd for  $C_{21}H_{21}^{35}ClN_2O_2Na$  (M+Na) 391.1184, found 391.1178, calcd for  $C_{21}H_{21}^{35}ClN_2O_2K$  (M+K) 407.0923, found 407.0913.

***N'*-(1-Cyclohexyl-2,2,2-trifluoroethyl)benzohydrazide (5f).**

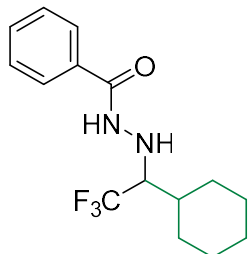

Yield 122 mg (81%). Colorless crystals. Mp 95-97 °C ( $CH_2Cl_2$ ).

Chromatography: EtOAc/PE, 1/5 (1%  $Et_3N$ ).  $R_f$  0.38.

$^1H$  NMR (300 MHz, Chloroform-*d*)  $\delta$  8.03 (d,  $J = 6.5$  Hz, 1H), 7.72 (d,  $J = 7.0$  Hz, 2H), 7.50 (t,  $J = 7.4$  Hz, 1H), 7.40 (t,  $J = 7.4$  Hz, 2H), 5.01 (d,  $J = 6.4$  Hz, 1H), 3.16 (dq,  $J = 8.1, 4.3$  Hz, 1H), 1.99 (d,  $J = 7.3$  Hz, 1H), 1.90 – 1.73 (m, 4H), 1.72 – 1.62 (m, 1H), 1.59 – 1.43 (m, 1H), 1.37 – 1.11 (m, 4H).

$^{13}C\{^1H\}$  NMR (76 MHz, Chloroform-*d*)  $\delta$  167.3, 132.2, 132.0, 128.6, 126.9, 126.6 (q,  $J = 283.1$  Hz), 66.9 (q,  $J = 25.3$  Hz), 37.1, 30.0, 28.2, 26.3, 26.2, 25.9.

$^{19}F$  NMR (282 MHz, Chloroform-*d*)  $\delta$  -70.69 (d,  $J = 8.0$  Hz).

HRMS (ESI): calcd for  $C_{15}H_{20}F_3N_2O$  (M+H) 301.1522, found 301.1531, calcd for  $C_{15}H_{19}F_3N_2ONa$  (M+Na) 323.1342, found 323.1351.

**3-Cyclobutylidene-2-cyclohexyl-2-fluoro-5-phenyl-2,3-dihydro-1,3 $\lambda^4$ ,4,2 $\lambda^4$ -oxadiazaborole (5g).**

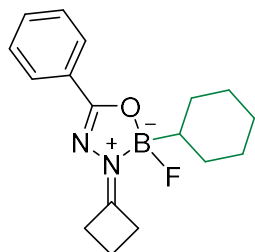

Yield 96 mg (64%). Light yellow crystals. Mp 114-116 °C (ethanol/water 1:1).

Chromatography: EtOAc/PE, 1/5 (1%  $Et_3N$ ).  $R_f$  0.28.

$^1\text{H}$  NMR (300 MHz, Chloroform-*d*)  $\delta$  8.13 – 8.04 (m, 2H), 7.58 – 7.49 (m, 1H), 7.48 – 7.39 (m, 2H), 3.48 – 3.21 (m, 4H), 2.35 – 2.21 (m, 2H), 1.94 – 1.54 (m, 4H), 1.44 – 1.31 (m, 1H), 1.30 – 1.08 (m, 4H), 1.03 – 0.80 (m, 1H), 0.78 – 0.59 (m, 1H).

$^{13}\text{C}\{^1\text{H}\}$  NMR (76 MHz, Chloroform-*d*)  $\delta$  173.8, 171.2, 132.4, 128.5, 128.4, 127.8, 34.3, 33.1, 27.9, 27.9, 27.8, 27.7, 27.5, 27.1, 14.8.

$^{19}\text{F}$  NMR (282 MHz, Chloroform-*d*)  $\delta$  -161.7 – -162.8 (br).

$^{11}\text{B}$  NMR (96 MHz, Chloroform-*d*)  $\delta$  17.8 – 4.1 (br).

HRMS (ESI): calcd for  $\text{C}_{17}\text{H}_{23}\text{BFN}_2\text{O}$  (M+H) 301.1885, found 301.1879, calcd for  $\text{C}_{17}\text{H}_{22}\text{BFN}_2\text{ONa}$  (M+Na) 323.1704, found 323.1697.

**2-Cyclohexyl-3-cyclohexylidene-2-fluoro-5-phenyl-2,3-dihydro-1,3 $\lambda^4$ ,4,2 $\lambda^4$ -oxadiazaborole (5h).**

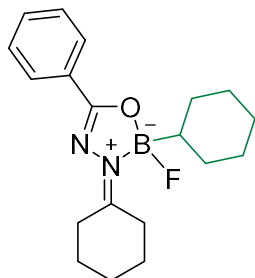

Yield 74 mg (45%). Light yellow crystals. Mp 120-120 °C ( $\text{CH}_2\text{Cl}_2$ ).

Chromatography: EtOAc/PE, 1/5 (1%  $\text{Et}_3\text{N}$ ).  $R_f$  0.43.

$^1\text{H}$  NMR (300 MHz, Chloroform-*d*)  $\delta$  8.14 – 8.05 (m, 2H), 7.58 – 7.49 (m, 1H), 7.49 – 7.40 (m, 2H), 3.12 – 2.89 (m, 2H), 2.87 – 2.67 (m, 2H), 2.01 – 1.50 (m, 10H), 1.38 – 1.05 (m, 5H), 0.96 – 0.78 (m, 1H), 0.76 – 0.61 (m, 1H).

$^{13}\text{C}\{^1\text{H}\}$  NMR (76 MHz, Chloroform-*d*)  $\delta$  174.3, 170.0, 132.2, 128.4, 128.3, 128.1, 32.1, 30.9, 27.9, 27.8, 27.75, 27.73, 27.5, 27.1, 26.8, 25.1.

$^{19}\text{F}$  NMR (282 MHz, Chloroform-*d*)  $\delta$  -160.7 – -162.2 (br).

$^{11}\text{B}$  NMR (96 MHz, Chloroform-*d*)  $\delta$  19.2 – 6.2 (br).

HRMS (ESI): calcd for  $\text{C}_{19}\text{H}_{27}\text{BFN}_2\text{O}$  (M+H) 329.2198, found 329.2203, calcd for  $\text{C}_{19}\text{H}_{26}\text{BFN}_2\text{ONa}$  (M+Na) 351.2018, found 351.2018, calcd for  $\text{C}_{19}\text{H}_{26}\text{BFN}_2\text{OK}$  (M+K) 367.1757, found 367.1750.

## Unsuccessful substrates

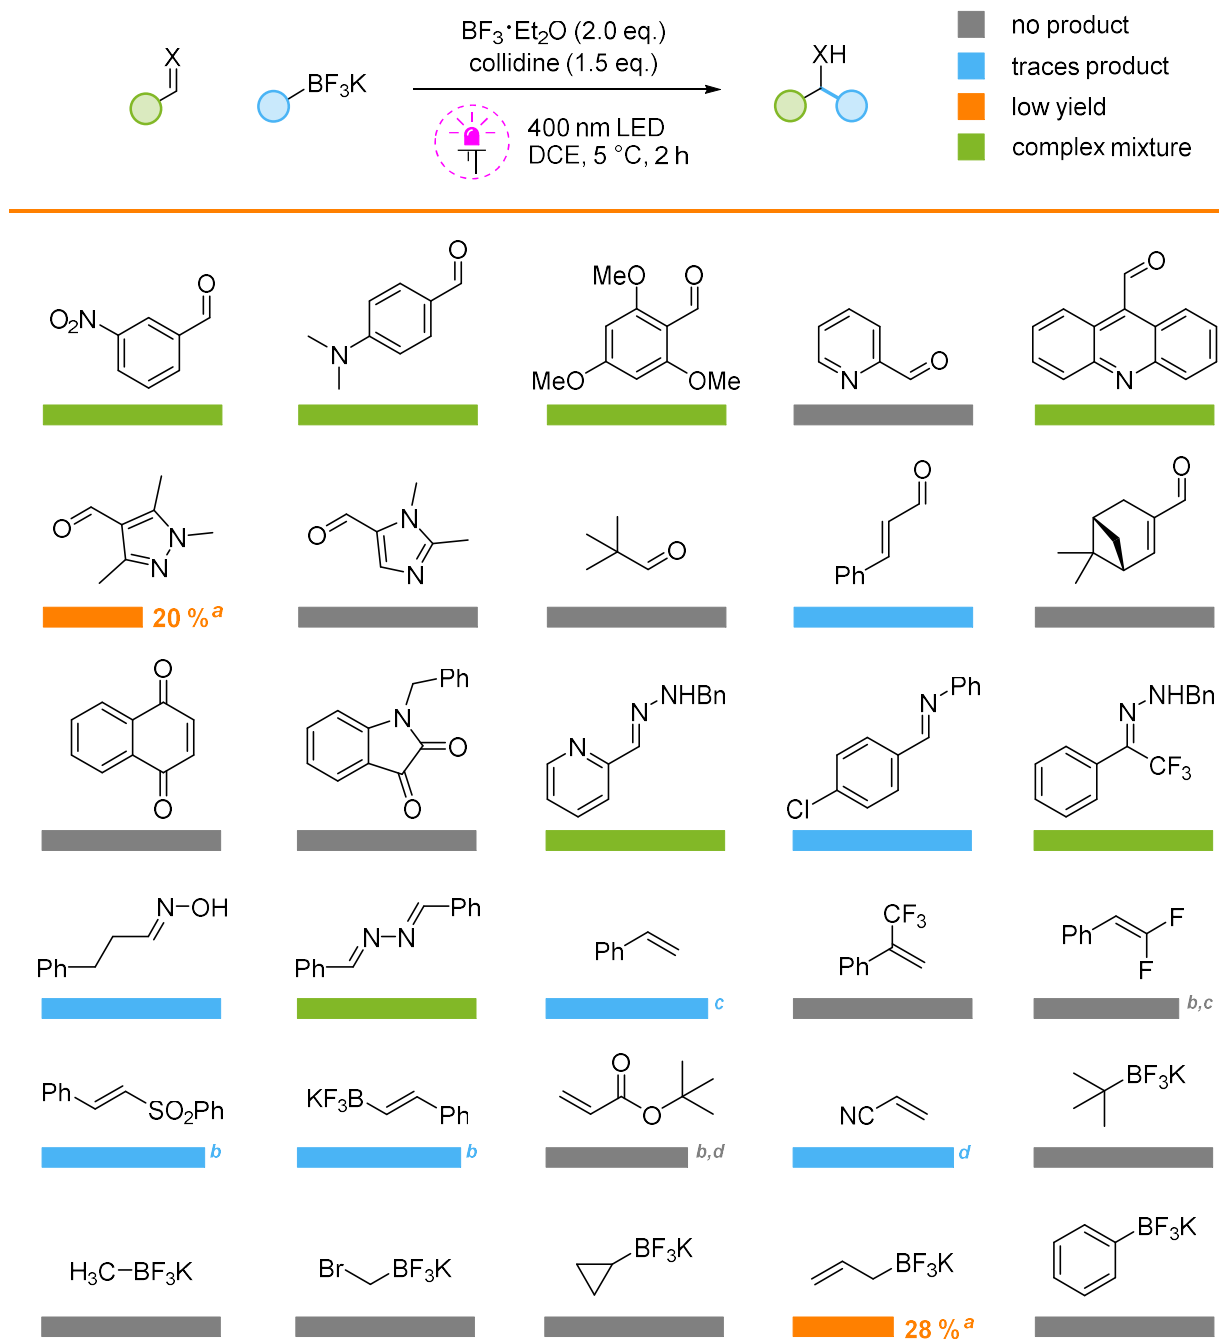

**Table S2.** Unsuccessful substrates according the reaction mixture analysis (by GS-MS or <sup>1</sup>H NMR). <sup>a</sup> <sup>1</sup>H NMR yield using CH<sub>2</sub>Br<sub>2</sub> as an internal standard. <sup>b</sup> The reaction was conducted without collidine. <sup>c</sup> The reaction was conducted on air. <sup>d</sup> The reaction was conducted with addition of  $\gamma$ -terpinene (1 equiv.)

## Additional experiments

### The reaction with *N*-(cyclohexanecarbonyloxy)phtalimide

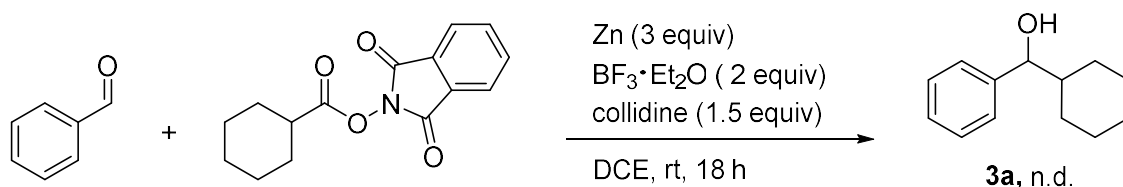

A tube equipped with an argon outlet and a stirring bar was charged with solid *N*-(cyclohexanecarbonyloxy)phtalimide (2.0 equiv, 1.0 mmol, 273 mg) and zinc dust (3.0 equiv, 1.5 mmol, 98 mg) followed by dry 1,2-dichloroethane (2 mL), benzaldehyde (1.0 equiv, 0.5 mmol, 53 mg) and 2,4,6-collidine (1.5 equiv, 0.75 mmol, 99  $\mu$ L) under inert atmosphere. Then, the reaction mixture was cooled to 5 °C and boron trifluoride etherate (2.0 equiv, 1.0 mmol, 123  $\mu$ L) was added by microsyringe in one portion. The mixture was stirred at room temperature for 18 h. The solvent was evaporated under reduced pressure, the residue was dissolved in methanol (2 mL), aqueous saturated solution of KHF<sub>2</sub> (0.5 mL) was added to the methanol solution with cooling by room temperature water bath. The mixture was stirred for 30 minutes at room temperature, diluted with water (5 mL), and extracted with diethyl ether (3 $\times$ 5 mL). The combined organic layers were filtered through Na<sub>2</sub>SO<sub>4</sub>, concentrated under reduced pressure and dissolved in 2 mL of CDCl<sub>3</sub>. <sup>1</sup>H NMR analysis with CH<sub>2</sub>Br<sub>2</sub> as an internal standard along with GC-MS data revealed no product formation.

### The reaction with cyclohexanecarboxylic acid

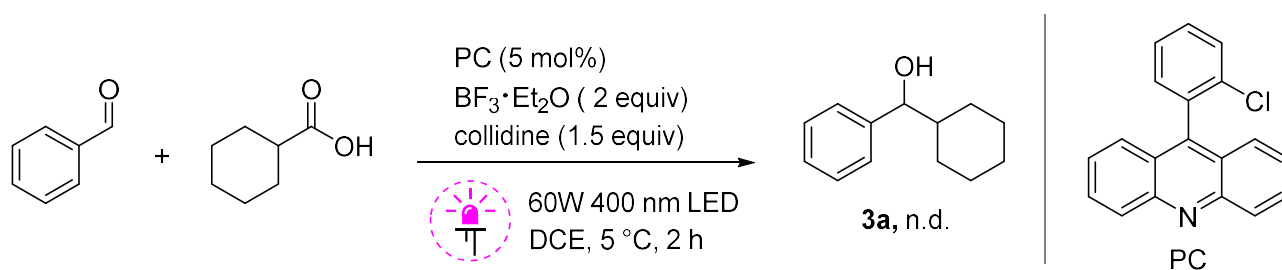

A tube equipped with an argon outlet and a stirring bar was charged with solid cyclohexylcarboxylic acid (2.0 equiv, 1.0 mmol, 128 mg) and 9-(*o*-chlorophenyl)acridine (5 mol %, 0.025 mmol, 7 mg) followed by dry 1,2-dichloroethane (2 mL), benzaldehyde (1.0 equiv, 0.5 mmol, 53 mg) and 2,4,6-collidine (1.5 equiv, 0.75 mmol, 99  $\mu$ L) under inert atmosphere. Then, the reaction mixture was cooled to 5 °C and boron trifluoride etherate (2.0 equiv, 1.0 mmol, 123

$\mu\text{L}$ ) was added with micro syringe in one portion. The mixture was irradiated by 400 nm LEDs at 5 °C (60W LEDs for 2 hours). The solvent was evaporated under reduced pressure, the residue was dissolved in methanol (2 mL), aqueous saturated solution of  $\text{KHF}_2$  (0.5 mL) was added to the resulting methanol solution with cooling by room temperature water bath. The mixture was stirred for 30 minutes at room temperature, diluted with water (5 mL), and extracted with diethyl ether ( $3 \times 5$  mL). The combined organic layers were filtered through  $\text{Na}_2\text{SO}_4$ , concentrated under reduced pressure and dissolved in 2 mL of  $\text{CDCl}_3$ .  $^1\text{H}$  NMR analysis with  $\text{CH}_2\text{Br}_2$  as an internal standard along with GC-MS data revealed no product formation.

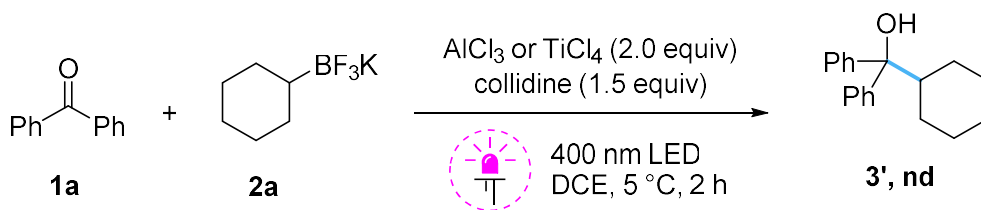

**Scheme S2.** The reactions were conducted according to GP1 with  $\text{KHF}_2$  workup. No product **3'** was detected by  $^1\text{H}$  NMR and GC-MS analysis of reaction mixtures.

## NMR Studies

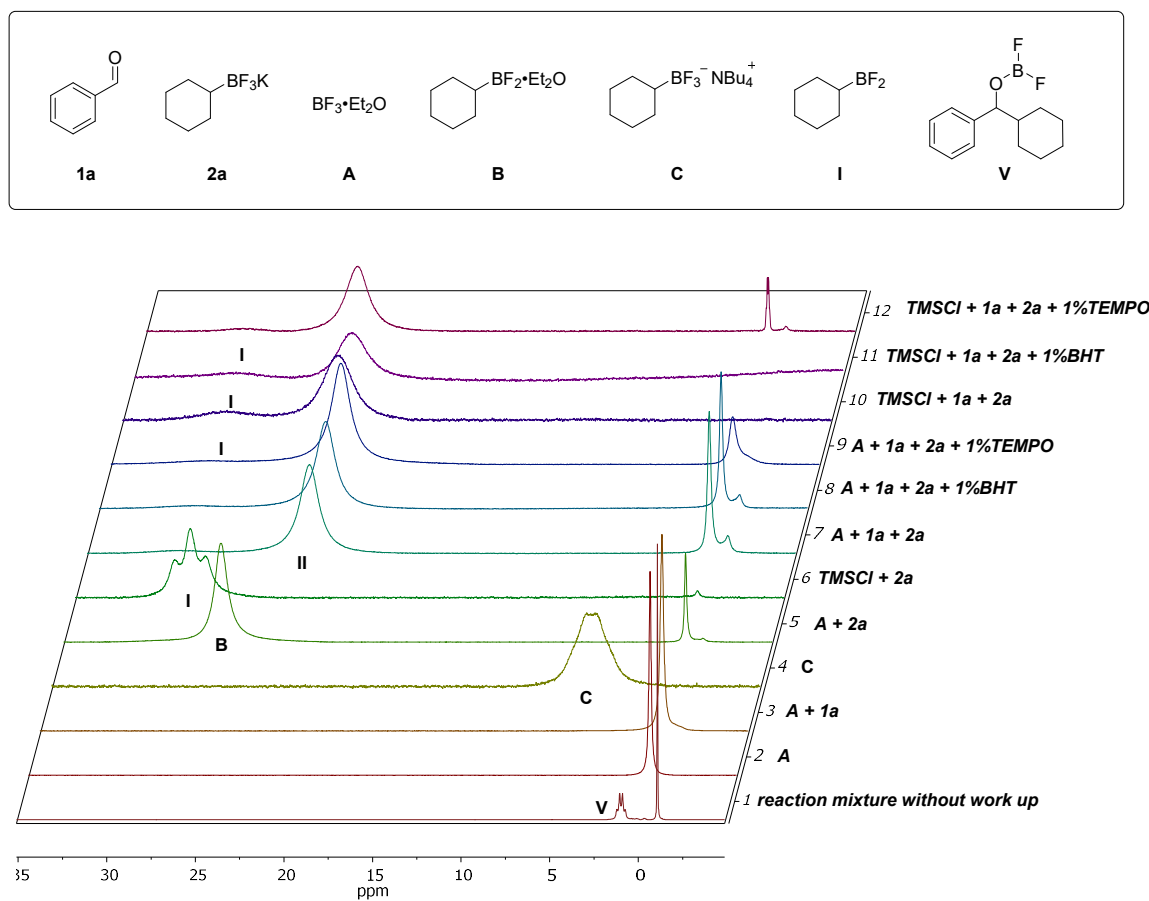

Figure S3.  $^{11}\text{B}$  NMR monitoring.

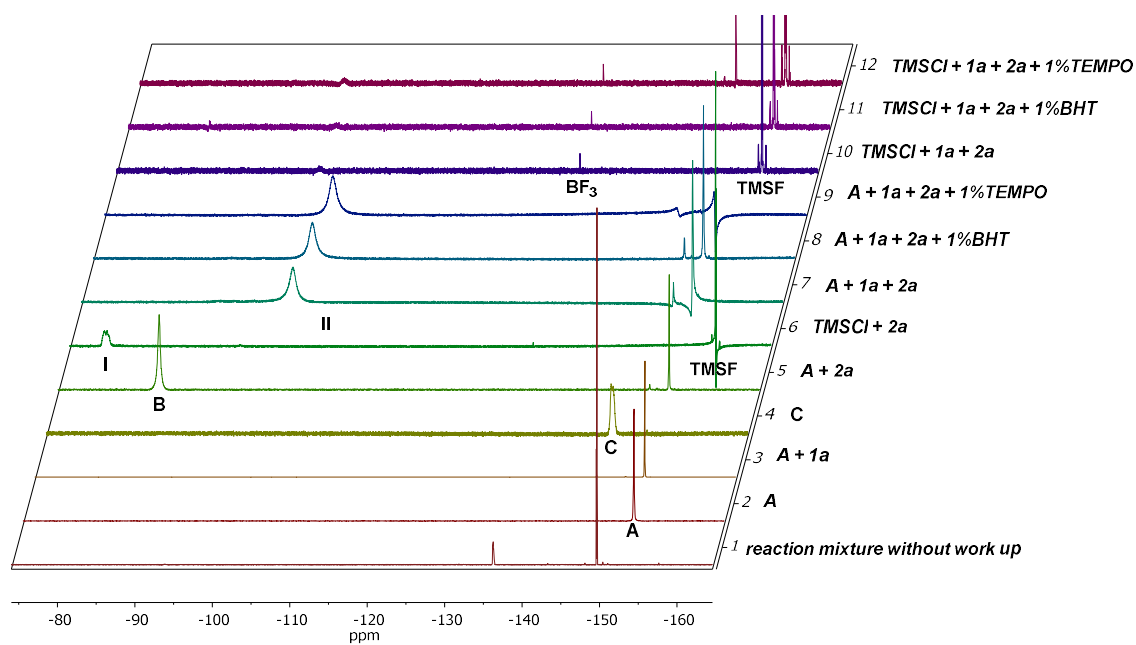

Figure S4.  $^{19}\text{F}$  NMR monitoring.



For the NMR study, solid reagents were added to the NMR tube, and then it was degassed and refilled with argon. After that, in the flow of argon, dry DCE was added to the NMR-tube, and then liquid reagents were added with microsyringes. Boron trifluoride etherate and trimethylsilyl chloride were added last for the corresponding samples. The reagents were mixed in 1:1 ratio (0.2 mmol of each reagent). A sample for the study of spectrum **C** was prepared by the reaction of **2a** (20 mg) with TBABr (20 mg) under air in 2 mL of DCE for 20 min and a sample of this mixture was used for analysis.

The NMR study showed the formation of cyclohexyldifluoroborane (**I**) in a mixture with TMSCl. The NMR spectra of **I** were in accordance with the literature data [32] and  $^{11}\text{B}$  spectrum showed a triplet signal of **I**:  $^{11}\text{B}$  NMR (96 MHz)  $\delta$  28.63 (t,  $J = 85.9$  Hz) (Fig. S3 plot **TMSCl + 2a**). In the case of the mixture of **2a** and **A**, the peaks of the alkyldifluoroborane adduct shifted to the upper field in both  $^{11}\text{B}$  and  $^{19}\text{F}$  spectra, which may be interpreted as a formation of tetracoordinated boron species **B**. Mixtures including benzaldehyde had a similar number of main peaks in boron spectra in both systems with  $\text{BF}_3$  and TMSCl.

## UV-Vis studies

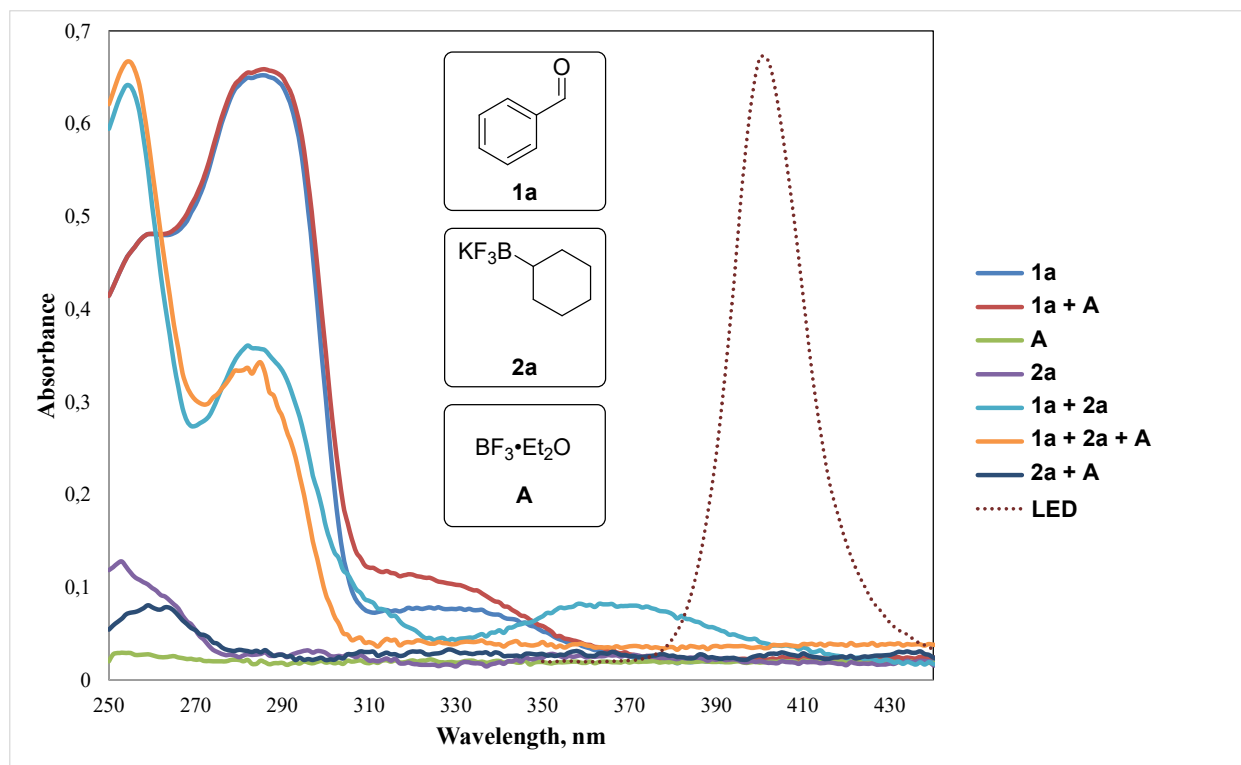

**Figure S5.** UV-vis spectra of reaction components mixtures in DCE. Components were mixed in 1:1 ratio. The concentration was  $1 \times 10^{-4}$  M.

## Light on/off experiments

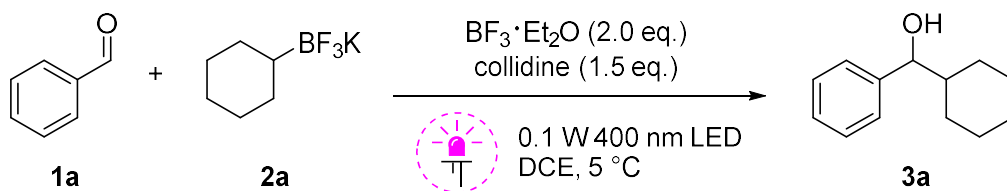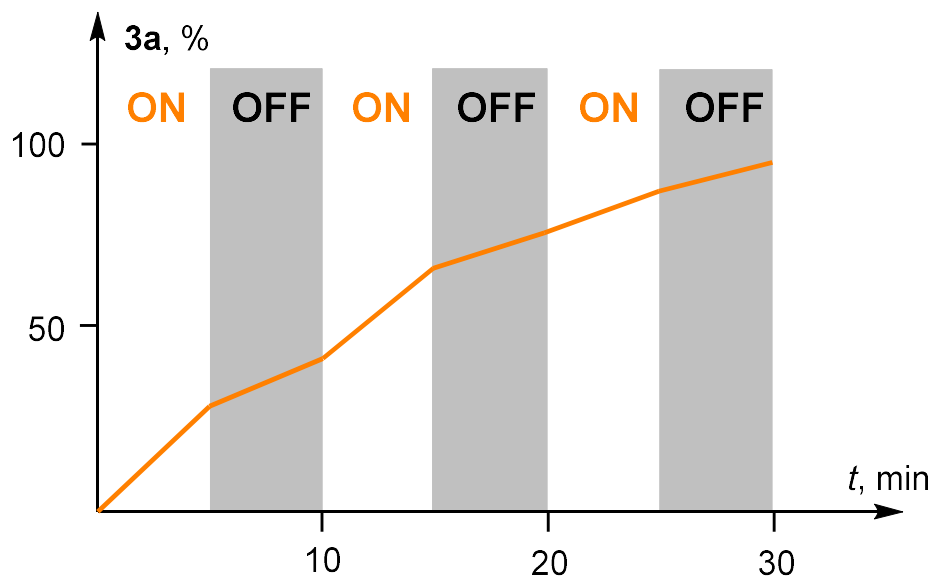

**Figure S6.** The reaction was conducted under conditions of GP I except 0.1 W 400 nm diode was used. The yields were determined by GC-FID with 1,3,5-triisopropyl benzene as internal standard. The same reaction in the dark gave 13% yield in 2 h.

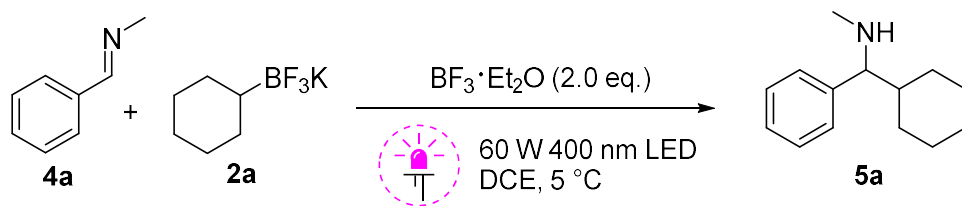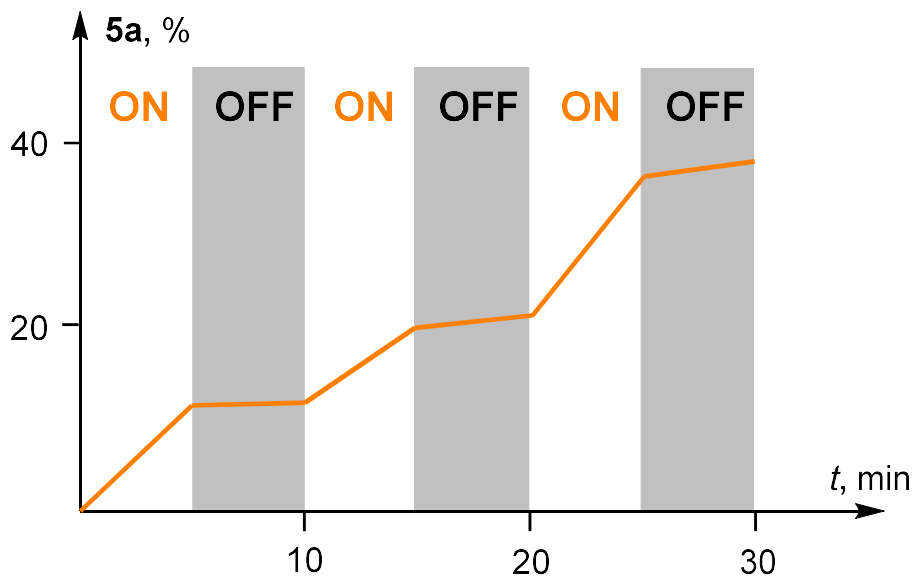

**Figure S7.** The reaction was conducted under conditions of GP III. The yields were determined by GC-FID with 1,3,5-triisopropyl benzene as internal standard. The same reaction in the dark gave no product in 2 h.

## X-ray crystallographic data and refinement details

X-ray diffraction data were collected at 100K on a four-circle Rigaku Synergy S diffractometer equipped with a HyPix6000HE area-detector (kappa geometry, shutterless  $\omega$ -scan technique), using monochromatized Cu  $K\alpha$ -radiation. The intensity data were integrated and corrected for absorption and decay by the CrysAlisPro program. [33] The structure was solved by direct methods using SHELXT [34] and refined on  $F^2$  using SHELXL-2018 [35] in the OLEX2 program. [36] All non-hydrogen atoms were refined with individual anisotropic displacement parameters. Locations of H1 and H3 hydrogen atoms of compounds **5g,h** were found from the electron density-difference map; these hydrogen atoms were refined with individual isotropic displacement parameters. All other hydrogen atoms were placed in ideal calculated positions and refined as riding atoms with relative isotropic displacement parameters.

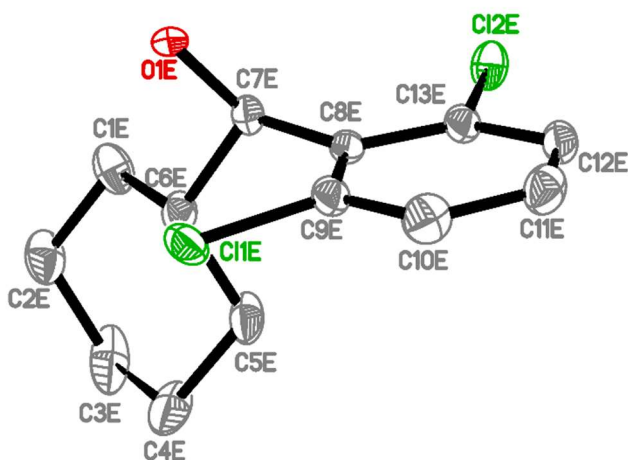

**Figure S8.** X-ray structure of compound **3e**. Anisotropic displacement parameters are drawn at the 50% probability.

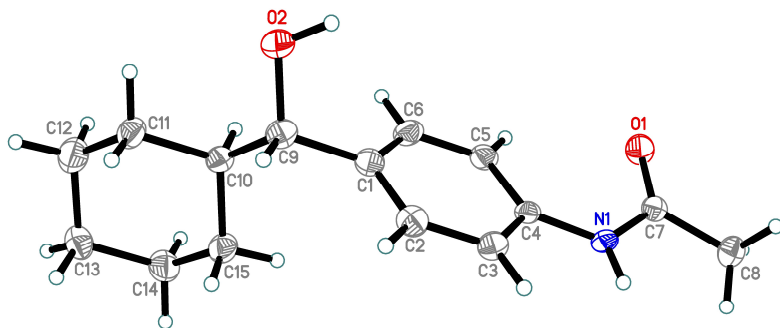

**Figure S9.** X-ray structure of compound **3j**. Anisotropic displacement parameters are drawn at the 50% probability.

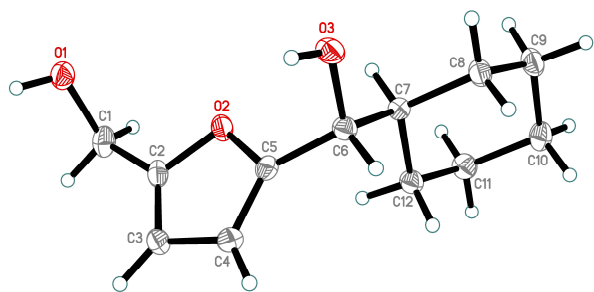

**Figure S10.** X-ray structure of compound **3v**. Anisotropic displacement parameters are drawn at the 50% probability.

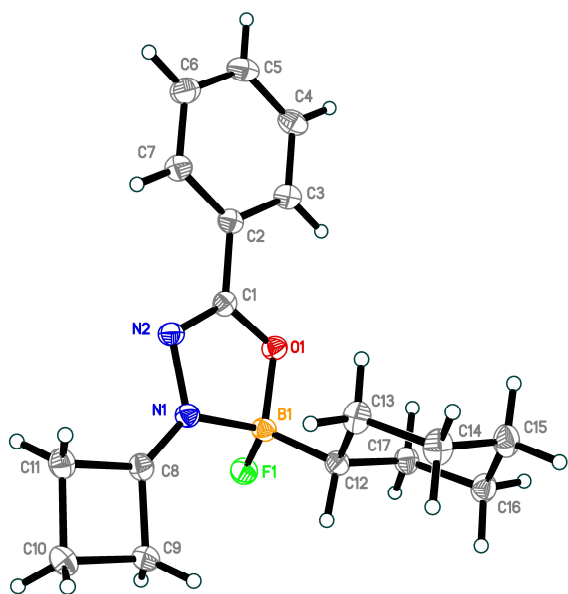

**Figure S11.** X-ray structure of compound **5g**. Anisotropic displacement parameters are drawn at the 50% probability.

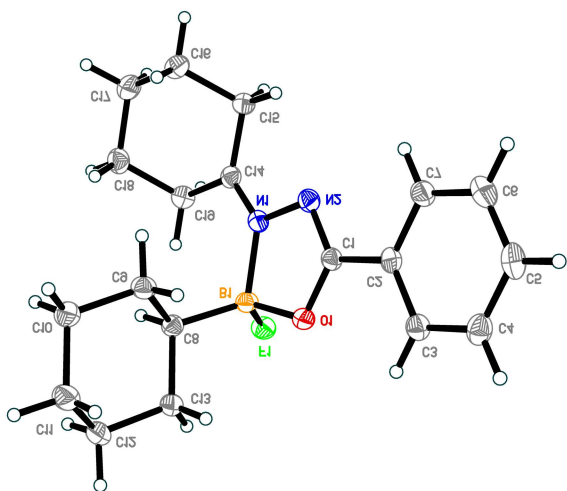

**Figure S12.** X-ray structure of compound **5h**. Anisotropic displacement parameters are drawn at the 50% probability.

**Table S3.** Crystal data and structure refinement for **3e**.

|                                   |                                                   |                 |
|-----------------------------------|---------------------------------------------------|-----------------|
| CCDC number                       | 2336546                                           |                 |
| Empirical formula                 | C <sub>13</sub> H <sub>16</sub> Cl <sub>2</sub> O |                 |
| Formula weight                    | 259.16                                            |                 |
| Temperature                       | 100.00(10) K                                      |                 |
| Wavelength                        | 1.54184 Å                                         |                 |
| Crystal system                    | Monoclinic                                        |                 |
| Space group                       | P 2 <sub>1</sub> /c                               |                 |
| Unit cell dimensions              | a = 18.89737(7) Å                                 | a = 90°         |
|                                   | b = 12.24079(6) Å                                 | b = 94.0661(4)° |
|                                   | c = 22.05573(9) Å                                 | g = 90°         |
| Volume                            | 5089.06(4) Å <sup>3</sup>                         |                 |
| Z                                 | 16                                                |                 |
| Density (calculated)              | 1.353 g/cm <sup>3</sup>                           |                 |
| Absorption coefficient            | 4.390 mm <sup>-1</sup>                            |                 |
| F(000)                            | 2176                                              |                 |
| Crystal size                      | 0.33 x 0.19 x 0.18 mm <sup>3</sup>                |                 |
| Theta range for data collection   | 2.344 to 80.618°                                  |                 |
| Index ranges                      | -17 ≤ h ≤ 23, -15 ≤ k ≤ 15, -28 ≤ l ≤ 28          |                 |
| Reflections collected             | 71168                                             |                 |
| Independent reflections           | 11049 [R(int) = 0.0278]                           |                 |
| Observed reflections              | 10520                                             |                 |
| Completeness to theta = 67.684°   | 100.0 %                                           |                 |
| Absorption correction             | Semi-empirical from equivalents                   |                 |
| Max. and min. transmission        | 1.00000 and 0.70827                               |                 |
| Refinement method                 | Full-matrix least-squares on F <sup>2</sup>       |                 |
| Data / restraints / parameters    | 11049 / 22 / 653                                  |                 |
| Goodness-of-fit on F <sup>2</sup> | 1.031                                             |                 |
| Final R indices [I > 2sigma(I)]   | R1 = 0.0384, wR2 = 0.1018                         |                 |
| R indices (all data)              | R1 = 0.0397, wR2 = 0.1028                         |                 |
| Largest diff. peak and hole       | 0.668 and -0.538 e.Å <sup>-3</sup>                |                 |

**Table S4.** Crystal data and structure refinement for **3j**.

|                                   |                                                 |                 |
|-----------------------------------|-------------------------------------------------|-----------------|
| CCDC number                       | 2336547                                         |                 |
| Empirical formula                 | C <sub>15</sub> H <sub>21</sub> NO <sub>2</sub> |                 |
| Formula weight                    | 247.33                                          |                 |
| Temperature                       | 100.00(10) K                                    |                 |
| Wavelength                        | 1.54184 Å                                       |                 |
| Crystal system                    | Monoclinic                                      |                 |
| Space group                       | P 2 <sub>1</sub> /c                             |                 |
| Unit cell dimensions              | a = 12.0689(2) Å                                | a = 90°         |
|                                   | b = 11.9115(2) Å                                | b = 102.217(2)° |
|                                   | c = 9.37870(10) Å                               | g = 90°         |
| Volume                            | 1317.74(4) Å <sup>3</sup>                       |                 |
| Z                                 | 4                                               |                 |
| Density (calculated)              | 1.247 g/cm <sup>3</sup>                         |                 |
| Absorption coefficient            | 0.651 mm <sup>-1</sup>                          |                 |
| F(000)                            | 536                                             |                 |
| Crystal size                      | 0.316 x 0.147 x 0.041 mm <sup>3</sup>           |                 |
| Theta range for data collection   | 3.747 to 80.810°                                |                 |
| Index ranges                      | -15 ≤ h ≤ 15, -15 ≤ k ≤ 15, -12 ≤ l ≤ 9         |                 |
| Reflections collected             | 5581                                            |                 |
| Independent reflections           | 5581                                            |                 |
| Observed reflections              | 5413                                            |                 |
| Completeness to theta = 67.684°   | 100.0 %                                         |                 |
| Absorption correction             | Semi-empirical from equivalents                 |                 |
| Max. and min. transmission        | 1.00000 and 0.96463                             |                 |
| Refinement method                 | Full-matrix least-squares on F <sup>2</sup>     |                 |
| Data / restraints / parameters    | 5581 / 0 / 173                                  |                 |
| Goodness-of-fit on F <sup>2</sup> | 1.037                                           |                 |
| Final R indices [I > 2σ(I)]       | R1 = 0.0554, wR2 = 0.1507                       |                 |
| R indices (all data)              | R1 = 0.0566, wR2 = 0.1518                       |                 |
| Largest diff. peak and hole       | 0.703 and -0.267 e.Å <sup>-3</sup>              |                 |



**Table S5.** Crystal data and structure refinement for **3v**.

|                                   |                                                |         |
|-----------------------------------|------------------------------------------------|---------|
| CCDC number                       | 2336548                                        |         |
| Empirical formula                 | C <sub>12</sub> H <sub>18</sub> O <sub>3</sub> |         |
| Formula weight                    | 210.26                                         |         |
| Temperature                       | 100.01(10) K                                   |         |
| Wavelength                        | 1.54184 Å                                      |         |
| Crystal system                    | Orthorhombic                                   |         |
| Space group                       | Pca2 <sub>1</sub>                              |         |
| Unit cell dimensions              | a = 9.13130(10) Å                              | a = 90° |
|                                   | b = 13.6328(2) Å                               | b = 90° |
|                                   | c = 9.04630(10) Å                              | g = 90° |
| Volume                            | 1126.13(2) Å <sup>3</sup>                      |         |
| Z                                 | 4                                              |         |
| Density (calculated)              | 1.240 g/cm <sup>3</sup>                        |         |
| Absorption coefficient            | 0.711 mm <sup>-1</sup>                         |         |
| F(000)                            | 456                                            |         |
| Crystal size                      | 0.33 x 0.22 x 0.2 mm <sup>3</sup>              |         |
| Theta range for data collection   | 3.242 to 81.093°                               |         |
| Index ranges                      | -11 ≤ h ≤ 11, -17 ≤ k ≤ 17, -11 ≤ l ≤ 11       |         |
| Reflections collected             | 14533                                          |         |
| Independent reflections           | 2367 [R(int) = 0.0303]                         |         |
| Observed reflections              | 2350                                           |         |
| Completeness to theta = 67.684°   | 99.8 %                                         |         |
| Absorption correction             | Semi-empirical from equivalents                |         |
| Max. and min. transmission        | 1.00000 and 0.78599                            |         |
| Refinement method                 | Full-matrix least-squares on F <sup>2</sup>    |         |
| Data / restraints / parameters    | 2367 / 1 / 138                                 |         |
| Goodness-of-fit on F <sup>2</sup> | 1.062                                          |         |
| Final R indices [I > 2σ(I)]       | R1 = 0.0286, wR2 = 0.0728                      |         |
| R indices (all data)              | R1 = 0.0288, wR2 = 0.0729                      |         |
| Absolute structure parameter      | 0.5                                            |         |
| Largest diff. peak and hole       | 0.197 and -0.165 e.Å <sup>-3</sup>             |         |

**Table S6.** Crystal data and structure refinement for **5g**.

|                                   |                                                    |         |
|-----------------------------------|----------------------------------------------------|---------|
| CCDC number                       | 2336549                                            |         |
| Empirical formula                 | C <sub>17</sub> H <sub>22</sub> BFN <sub>2</sub> O |         |
| Formula weight                    | 300.17                                             |         |
| Temperature                       | 100.0(3) K                                         |         |
| Wavelength                        | 1.54184 Å                                          |         |
| Crystal system                    | Orthorhombic                                       |         |
| Space group                       | Pbcn                                               |         |
| Unit cell dimensions              | a = 14.16710(10) Å                                 | a = 90° |
|                                   | b = 10.20320(10) Å                                 | b = 90° |
|                                   | c = 22.0229(2) Å                                   | g = 90° |
| Volume                            | 3183.41(5) Å <sup>3</sup>                          |         |
| Z                                 | 8                                                  |         |
| Density (calculated)              | 1.253 Mg/m <sup>3</sup>                            |         |
| Absorption coefficient            | 0.687 mm <sup>-1</sup>                             |         |
| F(000)                            | 1280                                               |         |
| Crystal size                      | 0.5 x 0.3 x 0.2 mm <sup>3</sup>                    |         |
| Theta range for data collection   | 4.015 to 77.583°                                   |         |
| Index ranges                      | -15 ≤ h ≤ 17, -11 ≤ k ≤ 12, -27 ≤ l ≤ 27           |         |
| Reflections collected             | 21992                                              |         |
| Independent reflections           | 3379 [R(int) = 0.0237]                             |         |
| Completeness to theta = 67.684°   | 100.0 %                                            |         |
| Absorption correction             | Semi-empirical from equivalents                    |         |
| Max. and min. transmission        | 1.00000 and 0.85786                                |         |
| Refinement method                 | Full-matrix least-squares on F <sup>2</sup>        |         |
| Data / restraints / parameters    | 3379 / 0 / 199                                     |         |
| Goodness-of-fit on F <sup>2</sup> | 1.030                                              |         |
| Final R indices [I > 2σ(I)]       | R1 = 0.0347, wR2 = 0.0882                          |         |
| R indices (all data)              | R1 = 0.0360, wR2 = 0.0894                          |         |
| Largest diff. peak and hole       | 0.276 and -0.180 e.Å <sup>-3</sup>                 |         |

**Table S7.** Crystal data and structure refinement for **5h**.

|                                   |                                                    |                   |
|-----------------------------------|----------------------------------------------------|-------------------|
| CCDC number                       | 2336550                                            |                   |
| Empirical formula                 | C <sub>19</sub> H <sub>26</sub> BFN <sub>2</sub> O |                   |
| Formula weight                    | 328.23                                             |                   |
| Temperature                       | 99.9(3) K                                          |                   |
| Wavelength                        | 1.54184 Å                                          |                   |
| Crystal system                    | Triclinic                                          |                   |
| Space group                       | P-1                                                |                   |
| Unit cell dimensions              | a = 9.52990(10) Å                                  | a = 101.2000(10)° |
|                                   | b = 11.13290(10) Å                                 | b = 94.3790(10)°  |
|                                   | c = 18.1267(2) Å                                   | g = 105.7310(10)° |
| Volume                            | 1798.84(3) Å <sup>3</sup>                          |                   |
| Z                                 | 4                                                  |                   |
| Density (calculated)              | 1.212 Mg/m <sup>3</sup>                            |                   |
| Absorption coefficient            | 0.648 mm <sup>-1</sup>                             |                   |
| F(000)                            | 704                                                |                   |
| Crystal size                      | 0.5 x 0.3 x 0.2 mm <sup>3</sup>                    |                   |
| Theta range for data collection   | 2.508 to 77.888°                                   |                   |
| Index ranges                      | -9 ≤ h ≤ 11, -14 ≤ k ≤ 14, -22 ≤ l ≤ 22            |                   |
| Reflections collected             | 47208                                              |                   |
| Independent reflections           | 7592 [R(int) = 0.0423]                             |                   |
| Completeness to theta = 67.684°   | 99.9 %                                             |                   |
| Absorption correction             | Semi-empirical from equivalents                    |                   |
| Max. and min. transmission        | 1.00000 and 0.60533                                |                   |
| Refinement method                 | Full-matrix least-squares on F <sup>2</sup>        |                   |
| Data / restraints / parameters    | 7592 / 0 / 433                                     |                   |
| Goodness-of-fit on F <sup>2</sup> | 1.034                                              |                   |
| Final R indices [I > 2σ(I)]       | R1 = 0.0376, wR2 = 0.0962                          |                   |
| R indices (all data)              | R1 = 0.0390, wR2 = 0.0973                          |                   |
| Largest diff. peak and hole       | 0.391 and -0.240 e.Å <sup>-3</sup>                 |                   |

## Radical trapping experiments

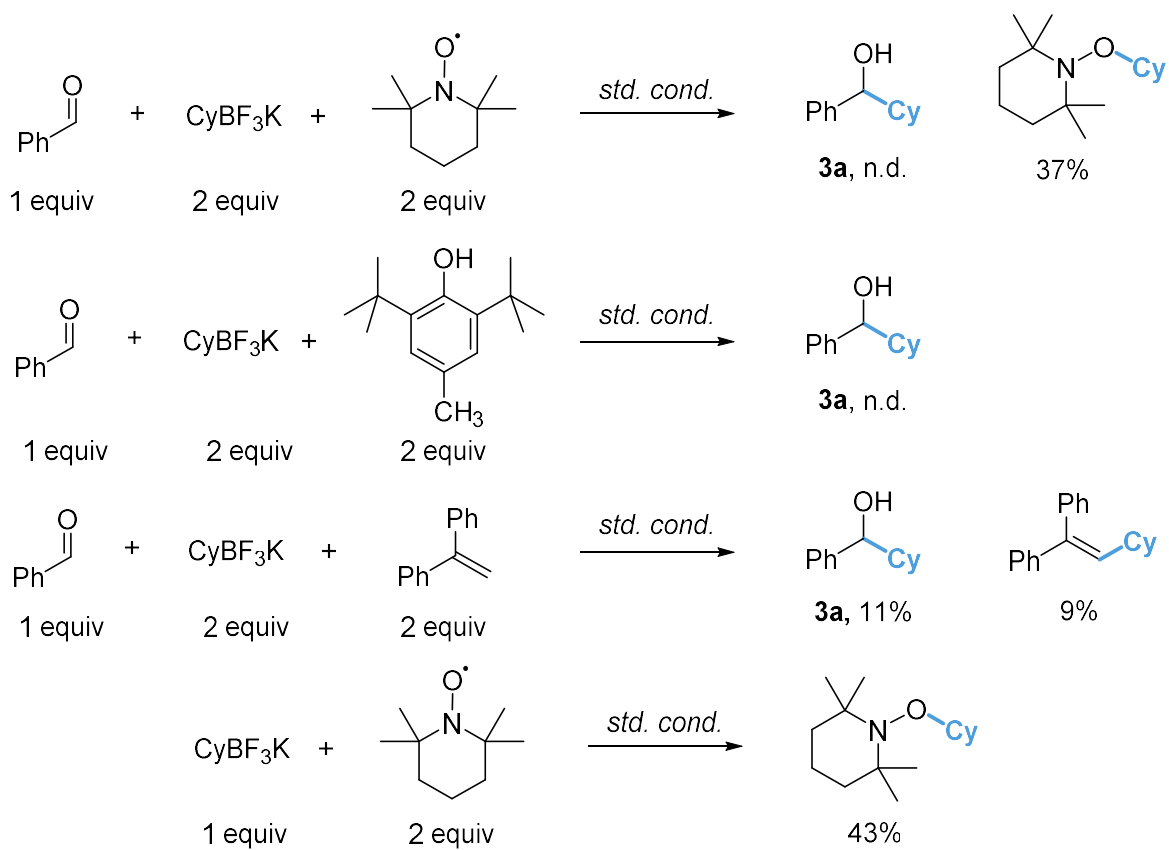

Scheme S3.

## EPR study

A Schlenk tube equipped with a stirring bar was charged with solid potassium cyclohexyltrifluoroborate **2a** (2.0 equiv, 0.6 mmol, 114 mg) and *N*-benzylidene-*tert*-butylamine *N*-oxide (1.5 equiv, 0.45 mmol). Then, the flask was evacuated and filled with argon. Dry 1,2-dichloroethane (2 mL) and benzaldehyde **1** (1.0 equiv, 0.3 mmol, 31  $\mu$ L) were added under argon atmosphere. Then, boron trifluoride etherate (2.0 equiv, 0.6 mmol, 74  $\mu$ L) was added with microsyringe in one portion. After stirring for 5 minutes, the precipitate was allowed to settle. The solution was taken into a Young tube under argon, and the tube was irradiated by 60W 400 nm LEDs for 30 seconds, the EPR spectrum was immediately recorded at 298 K on EPR spectrometer SPINSCAN X (ADANI).

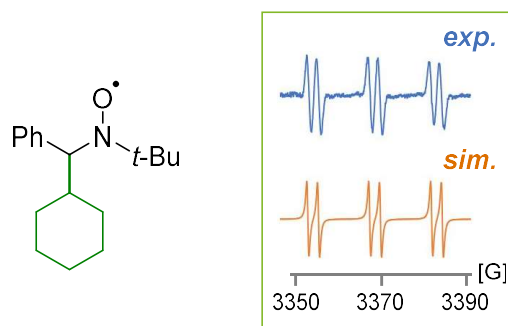

**Figure S13.** The X-band EPR spectrum of trapped cyclohexyl radical and corresponding simulated spectrum based on hyperfine coupling constants of  $A_N = 14.5$  G,  $A_H = 2.8$  G (g-factor = 2.0065).

Experiment parameters:

Center-Field: 3365 G

Width: 60 G

Points: 3000

Modulation Amplitude: 100  $\mu$ T

Modulation Frequency: 9.458138 GHz

Microwave Power: 1.0 mW

Time constant: 0.015 s

Number of scans: 1

## DFT calculations

All calculations were carried out using the Gaussian16 package [37]. Geometries of stationary points were optimized using the (U) $\omega$ B97XD functional with the def2SVP basis set. Stationary points were verified by vibrational analysis (no imaginary frequencies for intermediates and single imaginary frequency for the transition states). Key transition states were subjected to IRC calculations in forward and reverse directions. Solvation effects were evaluated using the PCM model (dichloromethane as solvent). Structures are given in the xyz format with energies in Hartrees.

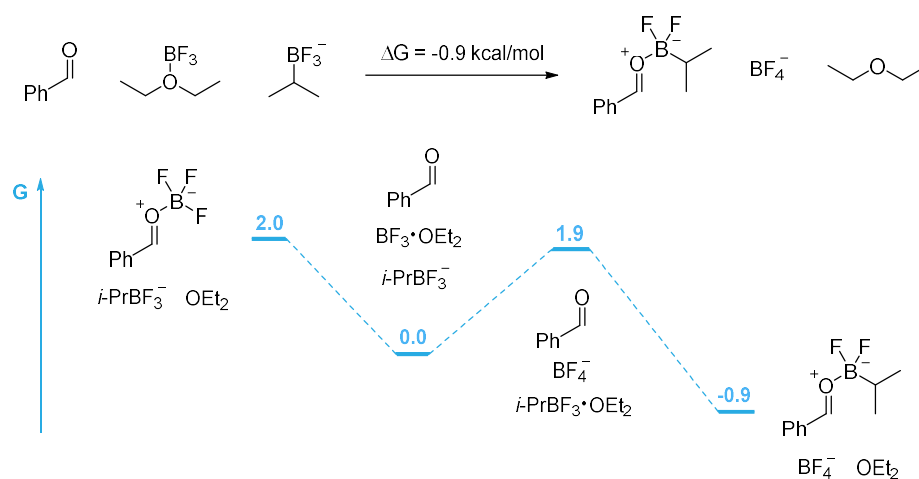

**Scheme S4.** DFT calculations of equilibrium between starting reagents.

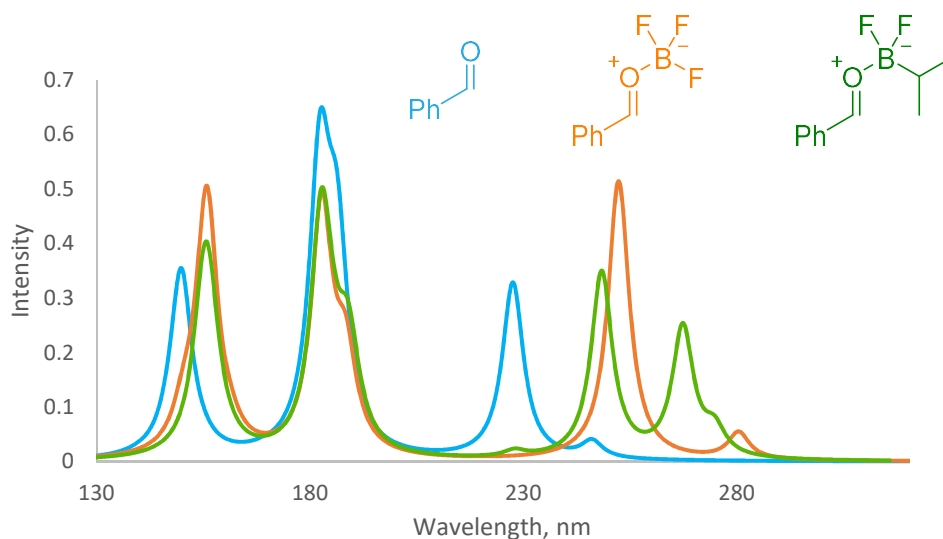

**Figure S13.** Calculated TD-DFT spectra of benzaldehyde and its complexes (first 15 excitations).

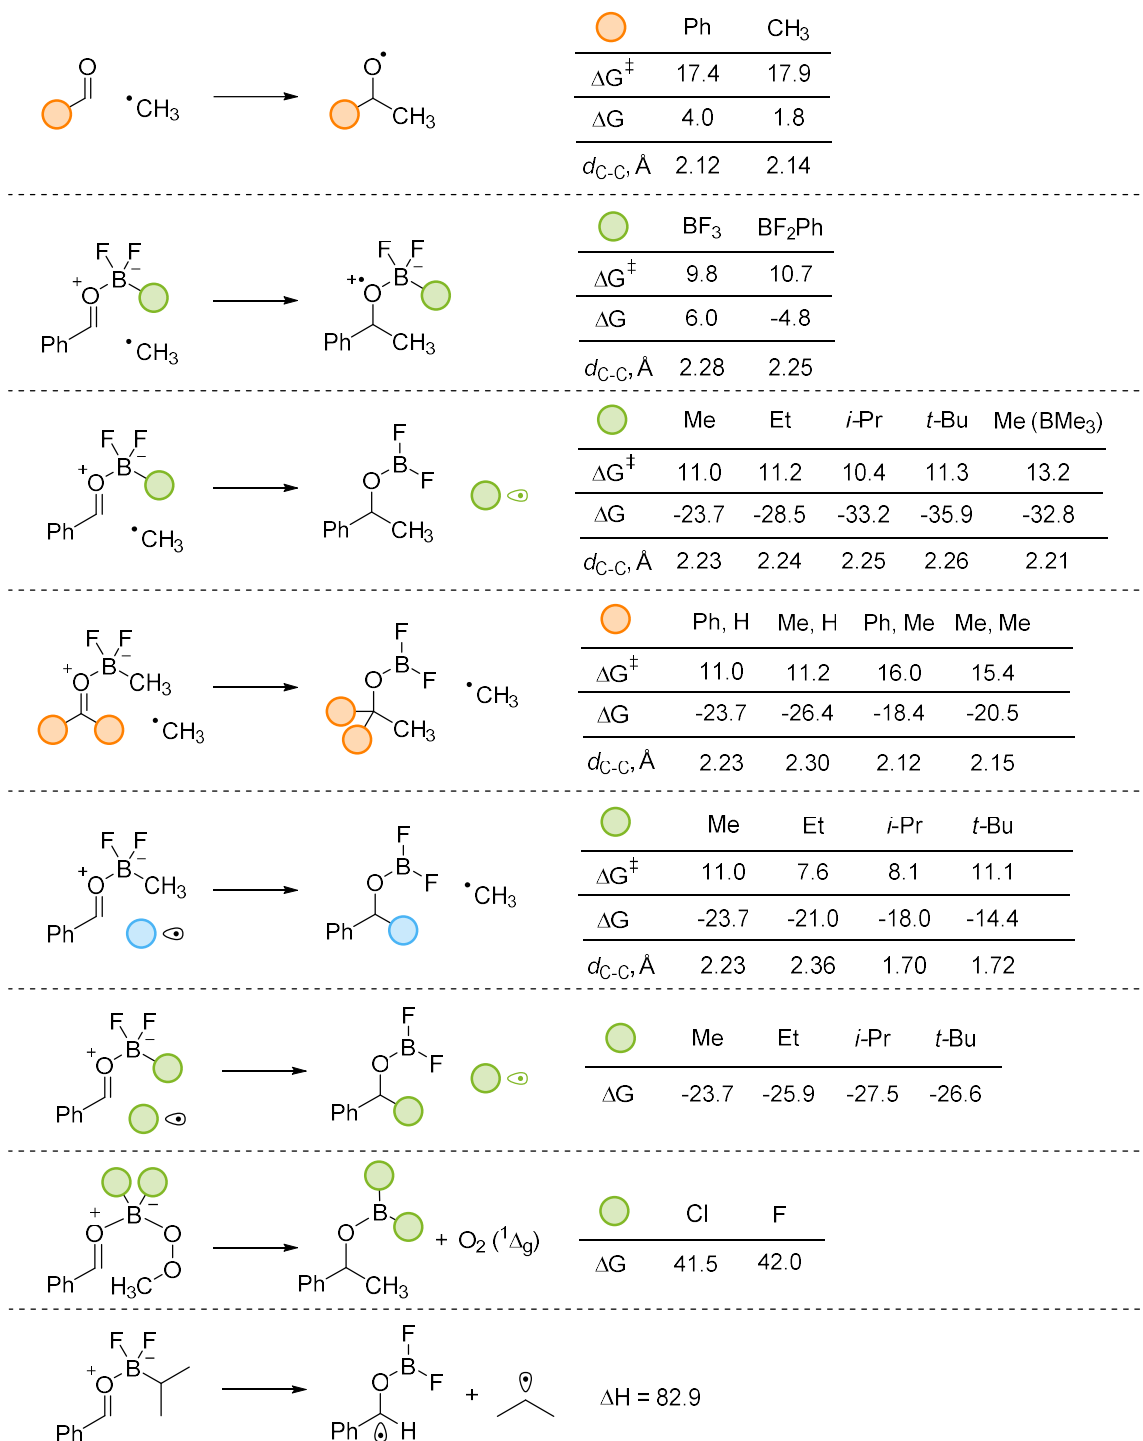

**Scheme S5.** Summary of DFT calculations.

## Energies and Cartesian coordinates

### Benzaldehyde

SCF Energy = -345.209705960  
 Zero-point correction = 0.111079  
 Thermal correction to Energy = 0.117322  
 Thermal correction to Enthalpy = 0.118266  
 Thermal correction to Gibbs Free Energy = 0.080568  
 Sum of electronic and zero-point Energies = -345.098627  
 Sum of electronic and thermal Energies = -345.092384  
 Sum of electronic and thermal Enthalpies = -345.091440  
 Sum of electronic and thermal Free Energies = -345.129138

|   |              |              |              |
|---|--------------|--------------|--------------|
| C | 0.533583000  | 0.212937000  | -0.000088000 |
| C | -0.357806000 | 1.291552000  | -0.000029000 |
| C | 0.044546000  | -1.100606000 | -0.000051000 |
| C | -1.732170000 | 1.061080000  | 0.000057000  |
| C | -1.326760000 | -1.329542000 | 0.000035000  |
| C | -2.214030000 | -0.248500000 | 0.000090000  |
| H | 0.029477000  | 2.314394000  | -0.000057000 |
| H | 0.757241000  | -1.928151000 | -0.000097000 |
| H | -2.428878000 | 1.901578000  | 0.000099000  |
| H | -1.711437000 | -2.351419000 | 0.000060000  |
| H | -3.291000000 | -0.430745000 | 0.000158000  |
| C | 1.993958000  | 0.466470000  | -0.000204000 |
| O | 2.839663000  | -0.396621000 | 0.000107000  |
| H | 2.279362000  | 1.546973000  | 0.000121000  |

### Acetaldehyde

SCF Energy = -153.669658122  
 Zero-point correction = 0.055808  
 Thermal correction to Energy = 0.059697  
 Thermal correction to Enthalpy = 0.060641  
 Thermal correction to Gibbs Free Energy = 0.030865  
 Sum of electronic and zero-point Energies = -153.613850  
 Sum of electronic and thermal Energies = -153.609962  
 Sum of electronic and thermal Enthalpies = -153.609017  
 Sum of electronic and thermal Free Energies = -153.638793

|   |              |              |              |
|---|--------------|--------------|--------------|
| O | -1.203386000 | 0.383832000  | 0.000000000  |
| C | 0.000000000  | 0.458071000  | 0.000000000  |
| C | 0.930404000  | -0.715701000 | 0.000000000  |
| H | 1.585878000  | -0.661623000 | 0.883465000  |
| H | 0.369794000  | -1.659260000 | 0.000000000  |
| H | 1.585878000  | -0.661623000 | -0.883465000 |
| H | 0.503116000  | 1.457630000  | 0.000000000  |

### Benzaldehyde/BF<sub>3</sub> complex

SCF Energy = -669.464765423  
 Zero-point correction = 0.126299  
 Thermal correction to Energy = 0.136647  
 Thermal correction to Enthalpy = 0.137591  
 Thermal correction to Gibbs Free Energy = 0.088567  
 Sum of electronic and zero-point Energies = -669.338467  
 Sum of electronic and thermal Energies = -669.328118  
 Sum of electronic and thermal Enthalpies = -669.327174  
 Sum of electronic and thermal Free Energies = -669.376198

|   |              |              |              |
|---|--------------|--------------|--------------|
| C | -1.166775000 | -0.216645000 | 0.000039000  |
| C | -2.080751000 | -1.284953000 | 0.000006000  |
| C | -1.624914000 | 1.114840000  | 0.000040000  |
| C | -3.445649000 | -1.023089000 | -0.000028000 |
| C | -2.988211000 | 1.366780000  | 0.000003000  |
| C | -3.893902000 | 0.299195000  | -0.000030000 |

|   |              |              |              |
|---|--------------|--------------|--------------|
| H | -1.714985000 | -2.314448000 | 0.000002000  |
| H | -0.901254000 | 1.931683000  | 0.000071000  |
| H | -4.162009000 | -1.845809000 | -0.000056000 |
| H | -3.355230000 | 2.394238000  | 0.000001000  |
| H | -4.966577000 | 0.504168000  | -0.000064000 |
| C | 0.242799000  | -0.518166000 | 0.000062000  |
| O | 1.114107000  | 0.365008000  | 0.000023000  |
| H | 0.563139000  | -1.572852000 | 0.000129000  |
| B | 2.689209000  | 0.044432000  | -0.000022000 |
| F | 3.150485000  | 0.625473000  | -1.147269000 |
| F | 2.801151000  | -1.326508000 | 0.000839000  |
| F | 3.150856000  | 0.626926000  | 1.146352000  |

### Benzaldehyde/BF<sub>2</sub>Ph complex

SCF Energy = -801.076628660  
 Zero-point correction = 0.215053  
 Thermal correction to Energy = 0.229475  
 Thermal correction to Enthalpy = 0.230419  
 Thermal correction to Gibbs Free Energy = 0.170999  
 Sum of electronic and zero-point Energies = -800.861576  
 Sum of electronic and thermal Energies = -800.847154  
 Sum of electronic and thermal Enthalpies = -800.846210  
 Sum of electronic and thermal Free Energies = -800.905630

|   |              |              |              |
|---|--------------|--------------|--------------|
| C | 2.371047000  | 0.121857000  | -0.148846000 |
| C | 3.342311000  | 0.117017000  | -1.163753000 |
| C | 2.635267000  | -0.484733000 | 1.092952000  |
| C | 4.572432000  | -0.490376000 | -0.937999000 |
| C | 3.864423000  | -1.089520000 | 1.310003000  |
| C | 4.829196000  | -1.090736000 | 0.295863000  |
| H | 3.127468000  | 0.590442000  | -2.124690000 |
| H | 1.868505000  | -0.472696000 | 1.869422000  |
| H | 5.332123000  | -0.497808000 | -1.720971000 |
| H | 4.079469000  | -1.563580000 | 2.268985000  |
| H | 5.795424000  | -1.568147000 | 0.472391000  |
| C | 1.100228000  | 0.760818000  | -0.409241000 |
| O | 0.197520000  | 0.818223000  | 0.434170000  |
| H | 0.928048000  | 1.215894000  | -1.399395000 |
| B | -1.281745000 | 1.475768000  | 0.119798000  |
| F | -1.084133000 | 2.193794000  | -1.049334000 |
| F | -1.475075000 | 2.291708000  | 1.209642000  |
| C | -2.268430000 | 0.222986000  | -0.008837000 |
| C | -2.395791000 | -0.474350000 | -1.219664000 |
| C | -3.014372000 | -0.230865000 | 1.088211000  |
| C | -3.233660000 | -1.583954000 | -1.333922000 |
| C | -3.856536000 | -1.339160000 | 0.984383000  |
| C | -3.966768000 | -2.019695000 | -0.228761000 |
| H | -1.832818000 | -0.139627000 | -2.096249000 |
| H | -2.938427000 | 0.297188000  | 2.042782000  |
| H | -3.318784000 | -2.110336000 | -2.287948000 |
| H | -4.430592000 | -1.673472000 | 1.852250000  |
| H | -4.625060000 | -2.887733000 | -0.314029000 |

### Benzaldehyde/BF<sub>2</sub>Me complex

SCF Energy = -609.540793930  
 Zero-point correction = 0.160040  
 Thermal correction to Energy = 0.171520  
 Thermal correction to Enthalpy = 0.172464  
 Thermal correction to Gibbs Free Energy = 0.121459  
 Sum of electronic and zero-point Energies = -609.380754



Sum of electronic and thermal Energies = -609.369274  
 Sum of electronic and thermal Enthalpies = -609.368330  
 Sum of electronic and thermal Free Energies = -609.419335

|   |              |              |              |
|---|--------------|--------------|--------------|
| C | -1.190783000 | 0.213539000  | -0.003098000 |
| C | -2.104869000 | 1.276791000  | 0.076092000  |
| C | -1.648228000 | -1.115014000 | -0.069053000 |
| C | -3.470255000 | 1.013301000  | 0.089681000  |
| C | -3.011730000 | -1.370046000 | -0.054720000 |
| C | -3.918719000 | -0.306990000 | 0.024434000  |
| H | -1.739648000 | 2.305434000  | 0.125877000  |
| H | -0.923518000 | -1.928728000 | -0.130611000 |
| H | -4.186457000 | 1.834066000  | 0.150864000  |
| H | -3.377158000 | -2.396978000 | -0.105369000 |
| H | -4.991057000 | -0.513568000 | 0.035051000  |
| C | 0.225428000  | 0.515924000  | -0.015859000 |
| O | 1.094351000  | -0.358949000 | -0.085742000 |
| H | 0.541337000  | 1.571624000  | 0.038735000  |
| B | 2.721143000  | -0.016624000 | -0.052731000 |
| F | 2.767363000  | 1.364680000  | -0.206947000 |
| F | 3.167399000  | -0.659191000 | -1.190070000 |
| C | 3.243753000  | -0.579775000 | 1.342723000  |
| H | 2.770943000  | -0.067788000 | 2.195826000  |
| H | 3.052410000  | -1.659369000 | 1.445498000  |
| H | 4.332165000  | -0.425772000 | 1.425655000  |

#### Benzaldehyde/BF<sub>2</sub>Et complex

SCF Energy = -648.814159729  
 Zero-point correction = 0.188926  
 Thermal correction to Energy = 0.201723  
 Thermal correction to Enthalpy = 0.202667  
 Thermal correction to Gibbs Free Energy = 0.148235  
 Sum of electronic and zero-point Energies = -648.625233  
 Sum of electronic and thermal Energies = -648.612437  
 Sum of electronic and thermal Enthalpies = -648.611492  
 Sum of electronic and thermal Free Energies = -648.665925

|   |              |              |              |
|---|--------------|--------------|--------------|
| C | -1.407955000 | 0.074589000  | -0.230189000 |
| C | -2.300952000 | 0.999579000  | -0.795346000 |
| C | -1.881305000 | -0.952130000 | 0.606895000  |
| C | -3.661336000 | 0.898224000  | -0.525602000 |
| C | -3.239604000 | -1.046160000 | 0.872133000  |
| C | -4.125631000 | -0.122339000 | 0.305959000  |
| H | -1.923537000 | 1.793585000  | -1.444021000 |
| H | -1.172602000 | -1.661395000 | 1.037839000  |
| H | -4.361363000 | 1.612658000  | -0.961277000 |
| H | -3.617250000 | -1.838334000 | 1.520592000  |
| H | -5.194063000 | -0.201090000 | 0.517946000  |
| C | 0.003418000  | 0.203144000  | -0.524993000 |
| O | 0.852434000  | -0.572644000 | -0.072750000 |
| H | 0.336309000  | 1.027224000  | -1.178888000 |
| B | 2.474480000  | -0.366140000 | -0.323222000 |
| F | 2.530496000  | 0.549045000  | -1.370277000 |
| F | 2.866868000  | -1.623741000 | -0.734616000 |
| C | 3.063585000  | 0.141598000  | 1.072138000  |
| H | 2.876515000  | -0.621422000 | 1.847445000  |
| H | 4.161917000  | 0.187523000  | 0.958454000  |
| C | 2.539468000  | 1.501902000  | 1.532943000  |
| H | 1.451416000  | 1.479015000  | 1.713442000  |
| H | 2.727304000  | 2.279570000  | 0.775811000  |
| H | 3.009079000  | 1.836347000  | 2.471179000  |

#### Benzaldehyde/BF<sub>2</sub>*i*-Pr complex

SCF Energy = -688.088691911

Zero-point correction = 0.217272  
 Thermal correction to Energy = 0.231399  
 Thermal correction to Enthalpy = 0.232343  
 Thermal correction to Gibbs Free Energy = 0.174951  
 Sum of electronic and zero-point Energies = -687.871420  
 Sum of electronic and thermal Energies = -687.857293  
 Sum of electronic and thermal Enthalpies = -687.856349  
 Sum of electronic and thermal Free Energies = -687.913741

|   |              |              |              |
|---|--------------|--------------|--------------|
| C | 1.785399000  | 0.042694000  | -0.233028000 |
| C | 2.697288000  | 0.872706000  | -0.905703000 |
| C | 2.227577000  | -0.826616000 | 0.780964000  |
| C | 4.045289000  | 0.833334000  | -0.567013000 |
| C | 3.573785000  | -0.859780000 | 1.113463000  |
| C | 4.478610000  | -0.031264000 | 0.439640000  |
| H | 2.344071000  | 1.544676000  | -1.691399000 |
| H | 1.504934000  | -1.463990000 | 1.293339000  |
| H | 4.759758000  | 1.474604000  | -1.085222000 |
| H | 3.927459000  | -1.530327000 | 1.898252000  |
| H | 5.537467000  | -0.061795000 | 0.705300000  |
| C | 0.388527000  | 0.103685000  | -0.604878000 |
| O | -0.476519000 | -0.594882000 | -0.064226000 |
| H | 0.080490000  | 0.802011000  | -1.401542000 |
| B | -2.076956000 | -0.467349000 | -0.421838000 |
| F | -2.424897000 | -1.782632000 | -0.664924000 |
| F | -2.100073000 | 0.282959000  | -1.595271000 |
| C | -2.763508000 | 0.222844000  | 0.852611000  |
| H | -2.543936000 | -0.415600000 | 1.728617000  |
| C | -4.285699000 | 0.257104000  | 0.665595000  |
| C | -2.216093000 | 1.624829000  | 1.134171000  |
| H | -1.135463000 | 1.615019000  | 1.350970000  |
| H | -2.375066000 | 2.292103000  | 0.270717000  |
| H | -2.713041000 | 2.089413000  | 2.002027000  |
| H | -4.561215000 | 0.875278000  | -0.205255000 |
| H | -4.794471000 | 0.684685000  | 1.545823000  |
| H | -4.696368000 | -0.750438000 | 0.498194000  |

#### Benzaldehyde/BF<sub>2</sub>*t*-Bu complex

SCF Energy = -727.365263738  
 Zero-point correction = 0.244664  
 Thermal correction to Energy = 0.260177  
 Thermal correction to Enthalpy = 0.261122  
 Thermal correction to Gibbs Free Energy = 0.200674  
 Sum of electronic and zero-point Energies = -727.120600  
 Sum of electronic and thermal Energies = -727.105086  
 Sum of electronic and thermal Enthalpies = -727.104142  
 Sum of electronic and thermal Free Energies = -727.164590

|   |              |              |              |
|---|--------------|--------------|--------------|
| C | -1.976087000 | -0.293940000 | -0.055826000 |
| C | -2.928432000 | -1.166078000 | 0.496901000  |
| C | -2.357463000 | 0.982055000  | -0.509832000 |
| C | -4.256110000 | -0.764794000 | 0.594784000  |
| C | -3.683610000 | 1.375384000  | -0.407694000 |
| C | -4.628944000 | 0.502412000  | 0.143224000  |
| H | -2.622923000 | -2.154894000 | 0.847154000  |
| H | -1.604212000 | 1.647026000  | -0.935922000 |
| H | -5.001733000 | -1.436635000 | 1.022471000  |
| H | -3.990042000 | 2.362981000  | -0.756094000 |
| H | -5.671770000 | 0.817324000  | 0.220845000  |
| C | -0.600761000 | -0.733695000 | -0.142329000 |
| O | 0.294828000  | -0.027351000 | -0.619441000 |
| H | -0.337631000 | -1.736410000 | 0.234955000  |
| B | 1.873990000  | -0.469542000 | -0.616961000 |
| F | 2.247254000  | -0.227001000 | -1.925570000 |

|   |             |              |              |
|---|-------------|--------------|--------------|
| F | 1.838994000 | -1.836623000 | -0.351375000 |
| C | 2.601806000 | 0.427936000  | 0.507689000  |
| C | 4.088196000 | 0.032455000  | 0.515463000  |
| C | 2.002880000 | 0.156609000  | 1.894728000  |
| H | 0.948714000 | 0.475214000  | 1.958394000  |
| H | 2.047533000 | -0.913527000 | 2.152691000  |
| H | 2.550306000 | 0.710139000  | 2.677441000  |
| H | 4.219704000 | -1.032797000 | 0.763361000  |
| H | 4.650144000 | 0.621594000  | 1.261534000  |
| H | 4.554269000 | 0.207407000  | -0.467206000 |
| C | 2.475346000 | 1.921182000  | 0.175890000  |
| H | 2.904213000 | 2.150613000  | -0.812145000 |
| H | 1.422208000 | 2.245189000  | 0.165074000  |
| H | 3.005478000 | 2.538734000  | 0.922304000  |

#### Benzaldehyde/B(Me)<sub>3</sub> complex

SCF Energy = -489.686244984  
 Zero-point correction = 0.227773  
 Thermal correction to Energy = 0.241169  
 Thermal correction to Enthalpy = 0.242114  
 Thermal correction to Gibbs Free Energy = 0.187501  
 Sum of electronic and zero-point Energies = -489.458472  
 Sum of electronic and thermal Energies = -489.445076  
 Sum of electronic and thermal Enthalpies = -489.444131  
 Sum of electronic and thermal Free Energies = -489.498744

|   |              |              |              |
|---|--------------|--------------|--------------|
| C | 1.238415000  | 0.237002000  | -0.002286000 |
| C | 2.170490000  | 1.285486000  | -0.000560000 |
| C | 1.674117000  | -1.098867000 | -0.002173000 |
| C | 3.532566000  | 1.000523000  | 0.001657000  |
| C | 3.034173000  | -1.376778000 | -0.000414000 |
| C | 3.960272000  | -0.327941000 | 0.001621000  |
| H | 1.823372000  | 2.321818000  | -0.000725000 |
| H | 0.935040000  | -1.902021000 | -0.003681000 |
| H | 4.262044000  | 1.812046000  | 0.003354000  |
| H | 3.381078000  | -2.411535000 | -0.000625000 |
| H | 5.029255000  | -0.551584000 | 0.003125000  |
| C | -0.181952000 | 0.559672000  | -0.004048000 |
| O | -1.058560000 | -0.300232000 | -0.001747000 |
| H | -0.465797000 | 1.627402000  | -0.007342000 |
| B | -2.742551000 | -0.037902000 | 0.000639000  |
| C | -3.198432000 | -0.822391000 | -1.338361000 |
| H | -4.298268000 | -0.780976000 | -1.430171000 |
| H | -2.784025000 | -0.378303000 | -2.260642000 |
| H | -2.918302000 | -1.889996000 | -1.325017000 |
| C | -2.979787000 | 1.561772000  | -0.041183000 |
| H | -2.585388000 | 2.100824000  | 0.839360000  |
| H | -2.580846000 | 2.053606000  | -0.946965000 |
| H | -4.068900000 | 1.741808000  | -0.048350000 |
| C | -3.183602000 | -0.748548000 | 1.385291000  |
| H | -2.756708000 | -0.256710000 | 2.277177000  |
| H | -4.282113000 | -0.698303000 | 1.487938000  |
| H | -2.906775000 | -1.816292000 | 1.426079000  |

#### Acetaldehyde/BF<sub>2</sub>Me complex

SCF Energy = -418.000206174  
 Zero-point correction = 0.105041  
 Thermal correction to Energy = 0.113897  
 Thermal correction to Enthalpy = 0.114841  
 Thermal correction to Gibbs Free Energy = 0.071469  
 Sum of electronic and zero-point Energies = -417.895165  
 Sum of electronic and thermal Energies = -417.886309  
 Sum of electronic and thermal Enthalpies = -417.885365

Sum of electronic and thermal Free Energies = -417.928737

|   |              |              |              |
|---|--------------|--------------|--------------|
| C | 1.517950000  | -0.095560000 | 0.258574000  |
| O | 0.566907000  | 0.180107000  | -0.466197000 |
| H | 1.313138000  | -0.554359000 | 1.242174000  |
| B | -1.035821000 | -0.077761000 | -0.008101000 |
| F | -0.916109000 | -0.849519000 | -1.137902000 |
| F | -1.500999000 | -0.822516000 | -1.069180000 |
| C | -1.647275000 | 1.378520000  | 0.181783000  |
| H | -1.148524000 | 1.932621000  | 0.992616000  |
| H | -1.570955000 | 1.977874000  | -0.738679000 |
| H | -2.715915000 | 1.302892000  | 0.441294000  |
| C | 2.913084000  | 0.164586000  | -0.136253000 |
| H | 3.471416000  | -0.783790000 | -0.094969000 |
| H | 2.975551000  | 0.612345000  | -1.134313000 |
| H | 3.370554000  | 0.823406000  | 0.618837000  |

#### Acetophenone/BF<sub>2</sub>Me complex

SCF Energy = -648.824382061  
 Zero-point correction = 0.187420  
 Thermal correction to Energy = 0.200599  
 Thermal correction to Enthalpy = 0.201544  
 Thermal correction to Gibbs Free Energy = 0.146326  
 Sum of electronic and zero-point Energies = -648.636962  
 Sum of electronic and thermal Energies = -648.623783  
 Sum of electronic and thermal Enthalpies = -648.622838  
 Sum of electronic and thermal Free Energies = -648.678056

|   |              |              |              |
|---|--------------|--------------|--------------|
| C | -1.263969000 | -0.187061000 | -0.044918000 |
| C | -2.285578000 | -1.145335000 | 0.057287000  |
| C | -1.599796000 | 1.177500000  | -0.100376000 |
| C | -3.616844000 | -0.743936000 | 0.105024000  |
| C | -2.930327000 | 1.572619000  | -0.062178000 |
| C | -3.939379000 | 0.611860000  | 0.041546000  |
| H | -2.051878000 | -2.208930000 | 0.112038000  |
| H | -0.801745000 | 1.916843000  | -0.176203000 |
| H | -4.406105000 | -1.492550000 | 0.190497000  |
| H | -3.185409000 | 2.632583000  | -0.111303000 |
| H | -4.985558000 | 0.923375000  | 0.073665000  |
| C | 0.160295000  | -0.567779000 | -0.071827000 |
| O | 0.992487000  | 0.356479000  | -0.036891000 |
| B | 2.644809000  | 0.265999000  | 0.031692000  |
| F | 2.997223000  | -0.405159000 | -1.134286000 |
| F | 2.878655000  | -0.527208000 | 1.146823000  |
| C | 3.128041000  | 1.779482000  | 0.131540000  |
| H | 2.814922000  | 2.364661000  | -0.747635000 |
| H | 2.727930000  | 2.277028000  | 1.029131000  |
| H | 4.227865000  | 1.825538000  | 0.187548000  |
| C | 0.591753000  | -1.995141000 | -0.102457000 |
| H | -0.158424000 | -2.650522000 | -0.554288000 |
| H | 1.542834000  | -2.076275000 | -0.639067000 |
| H | 0.763561000  | -2.315519000 | 0.937613000  |

#### Acetone/BF<sub>2</sub>Me complex

SCF Energy = -457.287971337  
 Zero-point correction = 0.132960  
 Thermal correction to Energy = 0.143152  
 Thermal correction to Enthalpy = 0.144096  
 Thermal correction to Gibbs Free Energy = 0.097723  
 Sum of electronic and zero-point Energies = -457.155012  
 Sum of electronic and thermal Energies = -457.144819  
 Sum of electronic and thermal Enthalpies = -457.143875  
 Sum of electronic and thermal Free Energies = -457.190248

|   |             |             |              |
|---|-------------|-------------|--------------|
| C | 1.386078000 | 0.158439000 | -0.001058000 |
|---|-------------|-------------|--------------|

|   |              |              |              |
|---|--------------|--------------|--------------|
| O | 0.275612000  | 0.706880000  | -0.001622000 |
| B | -1.220294000 | -0.028031000 | -0.000264000 |
| F | -1.190779000 | -0.818944000 | 1.140614000  |
| F | -1.196970000 | -0.811205000 | -1.146808000 |
| C | -2.262112000 | 1.174116000  | 0.006174000  |
| H | -2.145581000 | 1.809461000  | 0.898297000  |
| H | -2.150244000 | 1.814742000  | -0.882755000 |
| H | -3.292713000 | 0.783393000  | 0.007721000  |
| C | 2.595811000  | 1.021882000  | -0.000269000 |
| H | 3.202976000  | 0.784548000  | -0.887749000 |
| H | 2.326071000  | 2.083350000  | 0.008066000  |
| H | 3.212501000  | 0.771898000  | 0.876976000  |
| C | 1.544439000  | -1.322934000 | 0.001108000  |
| H | 1.001651000  | -1.735101000 | -0.861353000 |
| H | 2.597293000  | -1.621966000 | -0.022632000 |
| H | 1.049066000  | -1.722882000 | 0.897745000  |

#### Benzaldehyde/BF<sub>2</sub>(O<sub>2</sub>Me) complex

SCF Energy = -759.760804465

Zero-point correction = 0.170106

Thermal correction to Energy = 0.183362

Thermal correction to Enthalpy = 0.184306

Thermal correction to Gibbs Free Energy = 0.128643

Sum of electronic and zero-point Energies = -759.590698

Sum of electronic and thermal Energies = -759.577442

Sum of electronic and thermal Enthalpies = -759.576498

Sum of electronic and thermal Free Energies = -759.632161

|   |              |              |              |
|---|--------------|--------------|--------------|
| C | 0.024059000  | -0.460552000 | 0.572368000  |
| O | -0.807200000 | -0.837327000 | -0.270834000 |
| H | -0.321917000 | -0.235570000 | 1.593232000  |
| B | -2.371752000 | -0.663882000 | 0.010457000  |
| F | -2.531216000 | -0.884208000 | 1.360771000  |
| F | -2.995350000 | -1.581460000 | -0.781543000 |
| O | -2.680233000 | 0.662019000  | -0.440799000 |
| O | -1.902943000 | 1.577570000  | 0.317639000  |
| C | -1.320504000 | 2.471212000  | -0.596680000 |
| H | -0.646620000 | 1.949790000  | -1.297945000 |
| H | -2.090031000 | 3.017461000  | -1.165338000 |
| H | -0.743652000 | 3.178340000  | 0.014986000  |
| C | 1.424430000  | -0.310965000 | 0.260203000  |
| C | 2.299160000  | 0.103859000  | 1.278980000  |
| C | 1.908182000  | -0.559542000 | -1.038190000 |
| C | 3.651352000  | 0.266970000  | 1.001626000  |
| C | 3.258570000  | -0.393750000 | -1.306500000 |
| C | 4.125783000  | 0.017958000  | -0.287693000 |
| H | 1.912373000  | 0.297079000  | 2.282297000  |
| H | 1.213968000  | -0.878404000 | -1.817563000 |
| H | 4.337428000  | 0.588419000  | 1.786529000  |
| H | 3.644932000  | -0.583027000 | -2.309182000 |
| H | 5.188197000  | 0.147102000  | -0.505089000 |

#### Benzaldehyde/BCl<sub>2</sub>(O<sub>2</sub>Me) complex

SCF Energy = -1480.35650581

Zero-point correction = 0.167096

Thermal correction to Energy = 0.181149

Thermal correction to Enthalpy = 0.182093

Thermal correction to Gibbs Free Energy = 0.124109

Sum of electronic and zero-point Energies = -1480.189410

Sum of electronic and thermal Energies = -1480.175357

Sum of electronic and thermal Enthalpies = -1480.174412

Sum of electronic and thermal Free Energies = -1480.232397

|   |             |              |             |
|---|-------------|--------------|-------------|
| C | 0.409842000 | -0.041286000 | 0.639367000 |
|---|-------------|--------------|-------------|

|    |              |              |              |
|----|--------------|--------------|--------------|
| O  | -0.464643000 | -0.646137000 | -0.015928000 |
| H  | 0.093664000  | 0.605426000  | 1.471950000  |
| B  | -1.962515000 | -0.238186000 | -0.001926000 |
| O  | -2.076671000 | 0.874028000  | -0.886444000 |
| O  | -1.198450000 | 1.902938000  | -0.442362000 |
| C  | -0.548996000 | 2.401026000  | -1.586520000 |
| H  | 0.060647000  | 1.623059000  | -2.075851000 |
| H  | -1.273748000 | 2.810807000  | -2.307293000 |
| H  | 0.101020000  | 3.206510000  | -1.219016000 |
| C  | 1.809603000  | -0.186687000 | 0.347809000  |
| C  | 2.736312000  | 0.501617000  | 1.151937000  |
| C  | 2.249779000  | -0.985971000 | -0.725888000 |
| C  | 4.094988000  | 0.389473000  | 0.884800000  |
| C  | 3.607379000  | -1.091372000 | -0.984619000 |
| C  | 4.525026000  | -0.404879000 | -0.180214000 |
| H  | 2.384526000  | 1.120318000  | 1.980601000  |
| H  | 1.516792000  | -1.510911000 | -1.340704000 |
| H  | 4.821159000  | 0.919267000  | 1.502764000  |
| H  | 3.960752000  | -1.706837000 | -1.813184000 |
| H  | 5.593308000  | -0.491375000 | -0.389821000 |
| Cl | -2.897626000 | -1.637332000 | -0.723120000 |
| Cl | -2.445375000 | 0.112421000  | 1.763004000  |

#### Transition state of the methyl radical addition to benzaldehyde

SCF Energy = -384.995819445

Zero-point correction = 0.145095

Thermal correction to Energy = 0.153487

Thermal correction to Enthalpy = 0.154431

Thermal correction to Gibbs Free Energy = 0.111125

Sum of electronic and zero-point Energies = -384.850724

Sum of electronic and thermal Energies = -384.842333

Sum of electronic and thermal Enthalpies = -384.841388

Sum of electronic and thermal Free Energies = -384.884694

|   |              |              |              |
|---|--------------|--------------|--------------|
| C | -0.174628000 | 0.001355000  | -0.305540000 |
| C | 0.595683000  | 1.151602000  | -0.501644000 |
| C | 0.435173000  | -1.172314000 | 0.149105000  |
| C | 1.964854000  | 1.131665000  | -0.241361000 |
| C | 1.802501000  | -1.192256000 | 0.411486000  |
| C | 2.568617000  | -0.040118000 | 0.217634000  |
| H | 0.119080000  | 2.068090000  | -0.862262000 |
| H | -0.180201000 | -2.064049000 | 0.286961000  |
| H | 2.563694000  | 2.031403000  | -0.397850000 |
| H | 2.276744000  | -2.109887000 | 0.766519000  |
| H | 3.641289000  | -0.056790000 | 0.422954000  |
| C | -1.645191000 | 0.012550000  | -0.604515000 |
| O | -2.316549000 | -1.024047000 | -0.660463000 |
| H | -1.998572000 | 0.937317000  | -1.119650000 |
| C | -2.330576000 | 0.867324000  | 1.213293000  |
| H | -1.984823000 | 0.106017000  | 1.915696000  |
| H | -1.799411000 | 1.821992000  | 1.224010000  |
| H | -3.404014000 | 0.899443000  | 1.016571000  |

#### Transition state of the methyl radical addition to acetaldehyde

SCF Energy = -193.455253024

Zero-point correction = 0.090274

Thermal correction to Energy = 0.096005

Thermal correction to Enthalpy = 0.096949

Thermal correction to Gibbs Free Energy = 0.061611

Sum of electronic and zero-point Energies = -193.364979

Sum of electronic and thermal Energies = -193.359248

Sum of electronic and thermal Enthalpies = -193.358304

Sum of electronic and thermal Free Energies = -193.393642

|   |              |              |              |
|---|--------------|--------------|--------------|
| C | 0.318990000  | 0.274520000  | 0.380911000  |
| O | 0.343574000  | 1.364198000  | -0.198791000 |
| H | 0.026833000  | 0.230529000  | 1.458253000  |
| C | -1.663154000 | -0.398379000 | -0.079163000 |
| H | -1.565642000 | -0.533474000 | -1.158639000 |
| H | -1.719714000 | -1.303041000 | 0.531306000  |
| H | -2.248355000 | 0.460661000  | 0.253799000  |
| C | 1.126964000  | -0.908777000 | -0.106540000 |
| H | 1.133152000  | -0.943774000 | -1.204877000 |
| H | 2.165073000  | -0.767735000 | 0.237336000  |
| H | 0.763263000  | -1.860936000 | 0.301906000  |

Transition state of the methyl radical addition to benzaldehyde/BF<sub>3</sub> complex

SCF Energy = -709.262425648  
 Zero-point correction = 0.159858  
 Thermal correction to Energy = 0.172611  
 Thermal correction to Enthalpy = 0.173555  
 Thermal correction to Gibbs Free Energy = 0.118544  
 Sum of electronic and zero-point Energies = -709.102568  
 Sum of electronic and thermal Energies = -709.089815  
 Sum of electronic and thermal Enthalpies = -709.088871  
 Sum of electronic and thermal Free Energies = -709.143882

|   |              |              |              |
|---|--------------|--------------|--------------|
| C | 1.208001000  | 0.066170000  | -0.196544000 |
| C | 2.133326000  | 0.958917000  | -0.761297000 |
| C | 1.654928000  | -1.085554000 | 0.471981000  |
| C | 3.495200000  | 0.700199000  | -0.659096000 |
| C | 3.017156000  | -1.336343000 | 0.572345000  |
| C | 3.935214000  | -0.444843000 | 0.008661000  |
| H | 1.780528000  | 1.852501000  | -1.282059000 |
| H | 0.924637000  | -1.772246000 | 0.903124000  |
| H | 4.216844000  | 1.389602000  | -1.100258000 |
| H | 3.370344000  | -2.229829000 | 1.089962000  |
| H | 5.005371000  | -0.646331000 | 0.090179000  |
| C | -0.216931000 | 0.342466000  | -0.332238000 |
| O | -1.072458000 | -0.525637000 | -0.008866000 |
| H | -0.537170000 | 1.186857000  | -0.961420000 |
| B | -2.613415000 | -0.284905000 | -0.164002000 |
| F | -2.773498000 | 0.885711000  | -0.884782000 |
| F | -3.088298000 | -0.168296000 | 1.121379000  |
| C | -0.424357000 | 1.821583000  | 1.386580000  |
| H | -0.241031000 | 1.105751000  | 2.189841000  |
| H | 0.356530000  | 2.548404000  | 1.156248000  |
| H | -1.459172000 | 2.078897000  | 1.154805000  |
| F | -3.092132000 | -1.386255000 | -0.824578000 |

Transition state of the methyl radical addition to benzaldehyde/BF<sub>2</sub>Ph complex

SCF Energy = -840.873038363  
 Zero-point correction = 0.248731  
 Thermal correction to Energy = 0.265479  
 Thermal correction to Enthalpy = 0.266423  
 Thermal correction to Gibbs Free Energy = 0.201159  
 Sum of electronic and zero-point Energies = -840.624307  
 Sum of electronic and thermal Energies = -840.607560  
 Sum of electronic and thermal Enthalpies = -840.606615  
 Sum of electronic and thermal Free Energies = -840.671879

|   |             |              |              |
|---|-------------|--------------|--------------|
| C | 2.219585000 | -0.144099000 | -0.125161000 |
| C | 3.123734000 | -0.379951000 | -1.172295000 |
| C | 2.466628000 | -0.671137000 | 1.152112000  |
| C | 4.266740000 | -1.137802000 | -0.943080000 |
| C | 3.611722000 | -1.425591000 | 1.375202000  |

|   |              |              |              |
|---|--------------|--------------|--------------|
| C | 4.510732000  | -1.657557000 | 0.329945000  |
| H | 2.925618000  | 0.031309000  | -2.165371000 |
| H | 1.751973000  | -0.484578000 | 1.955446000  |
| H | 4.969559000  | -1.325833000 | -1.756453000 |
| H | 3.807753000  | -1.838494000 | 2.366304000  |
| H | 5.409595000  | -2.250989000 | 0.509924000  |
| C | 1.010620000  | 0.635536000  | -0.388868000 |
| O | 0.093661000  | 0.705868000  | 0.470102000  |
| H | 0.782825000  | 0.916230000  | -1.429174000 |
| B | -1.332092000 | 1.357644000  | 0.159915000  |
| F | -1.147382000 | 2.098552000  | -1.010280000 |
| F | -1.550258000 | 2.180559000  | 1.249614000  |
| C | 1.934914000  | 2.685994000  | -0.234867000 |
| H | 2.175452000  | 2.649365000  | 0.829246000  |
| H | 2.759279000  | 2.617676000  | -0.947201000 |
| H | 1.026597000  | 3.207535000  | -0.540690000 |
| C | -2.356854000 | 0.132270000  | 0.005109000  |
| C | -2.487585000 | -0.549943000 | -1.214126000 |
| C | -3.126688000 | -0.316828000 | 1.087610000  |
| C | -3.350097000 | -1.638227000 | -1.350550000 |
| C | -3.993490000 | -1.403943000 | 0.962524000  |
| C | -4.106048000 | -2.069147000 | -0.258920000 |
| H | -1.907561000 | -0.219470000 | -2.081290000 |
| H | -3.049771000 | 0.198909000  | 2.048967000  |
| H | -3.436394000 | -2.151941000 | -2.311439000 |
| H | -4.585091000 | -1.733744000 | 1.820420000  |
| H | -4.783388000 | -2.920595000 | -0.361182000 |

Transition state of the methyl radical addition to benzaldehyde/BF<sub>2</sub>Me complex

SCF Energy = -649.336814214  
 Zero-point correction = 0.193874  
 Thermal correction to Energy = 0.207608  
 Thermal correction to Enthalpy = 0.208552  
 Thermal correction to Gibbs Free Energy = 0.151693  
 Sum of electronic and zero-point Energies = -649.142940  
 Sum of electronic and thermal Energies = -649.129207  
 Sum of electronic and thermal Enthalpies = -649.128262  
 Sum of electronic and thermal Free Energies = -649.185121

|   |              |              |              |
|---|--------------|--------------|--------------|
| C | 1.218165000  | 0.054676000  | -0.177105000 |
| C | 2.143914000  | 0.826075000  | -0.895866000 |
| C | 1.661344000  | -0.997280000 | 0.639133000  |
| C | 3.502773000  | 0.546022000  | -0.799776000 |
| C | 3.020523000  | -1.270736000 | 0.733048000  |
| C | 3.939947000  | -0.499948000 | 0.015565000  |
| H | 1.794761000  | 1.644043000  | -1.531304000 |
| H | 0.929928000  | -1.591714000 | 1.189278000  |
| H | 4.224085000  | 1.142373000  | -1.361084000 |
| H | 3.369349000  | -2.088518000 | 1.366188000  |
| H | 5.007234000  | -0.718018000 | 0.092234000  |
| C | -0.211505000 | 0.347775000  | -0.305420000 |
| O | -1.070429000 | -0.444137000 | 0.160726000  |
| H | -0.530638000 | 1.090560000  | -1.053641000 |
| B | -2.646175000 | -0.262094000 | -0.097351000 |
| F | -2.774294000 | 1.020687000  | -0.651224000 |
| F | -3.174671000 | -0.281689000 | 1.187232000  |
| C | -0.312018000 | 2.037224000  | 1.152376000  |
| H | -0.105064000 | 1.458029000  | 2.054222000  |
| H | 0.469995000  | 2.704985000  | 0.785847000  |
| H | -1.350776000 | 2.281816000  | 0.924944000  |
| C | -3.098897000 | -1.454225000 | -1.059982000 |
| H | -2.881522000 | -2.440003000 | -0.618884000 |

|   |              |              |              |
|---|--------------|--------------|--------------|
| H | -4.184619000 | -1.404455000 | -1.244931000 |
| H | -2.593216000 | -1.404004000 | -2.037826000 |

Transition state of the methyl radical addition to benzaldehyde/BF<sub>2</sub>Et complex

SCF Energy = -688.609622091  
 Zero-point correction = 0.222685  
 Thermal correction to Energy = 0.237803  
 Thermal correction to Enthalpy = 0.238747  
 Thermal correction to Gibbs Free Energy = 0.178280  
 Sum of electronic and zero-point Energies = -688.386937  
 Sum of electronic and thermal Energies = -688.371819  
 Sum of electronic and thermal Enthalpies = -688.370875  
 Sum of electronic and thermal Free Energies = -688.431342

|   |              |              |              |
|---|--------------|--------------|--------------|
| C | -1.440195000 | -0.095281000 | -0.166355000 |
| C | -2.424262000 | -0.622646000 | -1.016052000 |
| C | -1.783155000 | 0.863143000  | 0.799730000  |
| C | -3.741943000 | -0.192934000 | -0.901255000 |
| C | -3.101889000 | 1.286499000  | 0.911389000  |
| C | -4.079862000 | 0.758885000  | 0.063026000  |
| H | -2.151513000 | -1.367965000 | -1.767645000 |
| H | -1.006833000 | 1.267445000  | 1.451623000  |
| H | -4.508296000 | -0.598561000 | -1.563938000 |
| H | -3.373255000 | 2.032145000  | 1.660836000  |
| H | -5.115038000 | 1.094439000  | 0.154249000  |
| C | -0.053087000 | -0.540222000 | -0.316829000 |
| O | 0.878212000  | 0.055430000  | 0.281900000  |
| H | 0.198295000  | -1.193720000 | -1.167506000 |
| B | 2.426422000  | -0.243616000 | -0.018912000 |
| F | 2.435682000  | -1.492119000 | -0.658889000 |
| F | 2.973922000  | -0.348736000 | 1.253398000  |
| C | -0.216090000 | -2.436217000 | 0.868080000  |
| H | -0.382704000 | -1.976738000 | 1.844181000  |
| H | -1.060036000 | -2.938675000 | 0.391546000  |
| H | 0.793513000  | -2.767377000 | 0.620267000  |
| C | 2.971457000  | 0.961783000  | -0.921566000 |
| H | 4.031925000  | 0.751143000  | -1.151183000 |
| H | 2.448496000  | 0.947594000  | -1.894971000 |
| C | 2.845192000  | 2.344935000  | -0.281995000 |
| H | 3.380180000  | 2.387951000  | 0.679971000  |
| H | 1.791408000  | 2.592800000  | -0.076079000 |
| H | 3.252625000  | 3.144181000  | -0.921613000 |

Transition state of the methyl radical addition to benzaldehyde/BF<sub>2</sub>i-Pr complex

SCF Energy = -727.885660023  
 Zero-point correction = 0.250753  
 Thermal correction to Energy = 0.267234  
 Thermal correction to Enthalpy = 0.268178  
 Thermal correction to Gibbs Free Energy = 0.205109  
 Sum of electronic and zero-point Energies = -727.634907  
 Sum of electronic and thermal Energies = -727.618426  
 Sum of electronic and thermal Enthalpies = -727.617482  
 Sum of electronic and thermal Free Energies = -727.680551

|   |             |              |              |
|---|-------------|--------------|--------------|
| C | 1.596317000 | 0.097576000  | -0.117627000 |
| C | 2.545608000 | 0.380068000  | -1.111454000 |
| C | 1.959298000 | -0.652378000 | 1.011730000  |
| C | 3.849115000 | -0.085467000 | -0.976743000 |
| C | 3.263927000 | -1.112348000 | 1.141847000  |
| C | 4.207406000 | -0.828714000 | 0.149861000  |
| H | 2.257004000 | 0.963033000  | -1.989893000 |
| H | 1.209057000 | -0.868302000 | 1.774343000  |

|   |              |              |              |
|---|--------------|--------------|--------------|
| H | 4.588409000  | 0.129174000  | -1.750248000 |
| H | 3.551081000  | -1.696607000 | 2.017900000  |
| H | 5.231583000  | -1.192449000 | 0.256079000  |
| C | 0.222090000  | 0.571429000  | -0.287932000 |
| O | -0.692318000 | 0.171486000  | 0.476694000  |
| H | -0.057733000 | 1.040817000  | -1.244222000 |
| B | -2.238798000 | 0.446160000  | 0.179529000  |
| F | -2.248604000 | 1.503258000  | -0.743513000 |
| F | -2.728543000 | 0.873225000  | 1.406871000  |
| C | 0.530111000  | 2.680502000  | 0.440913000  |
| H | 0.754983000  | 2.435168000  | 1.480503000  |
| H | 1.351249000  | 3.022633000  | -0.191865000 |
| H | -0.483754000 | 2.999011000  | 0.193672000  |
| C | -2.865483000 | -0.925060000 | -0.380908000 |
| H | -3.932935000 | -0.695091000 | -0.565690000 |
| C | -2.798328000 | -2.059742000 | 0.644589000  |
| C | -2.243177000 | -1.344802000 | -1.715318000 |
| H | -2.306462000 | -0.541438000 | -2.465660000 |
| H | -1.176310000 | -1.604359000 | -1.595043000 |
| H | -2.738130000 | -2.235311000 | -2.137698000 |
| H | -1.751018000 | -2.321289000 | 0.872010000  |
| H | -3.292119000 | -2.975331000 | 0.277213000  |
| H | -3.279360000 | -1.777072000 | 1.593422000  |

Transition state of the methyl radical addition to benzaldehyde/BF<sub>2</sub>t-Bu complex

SCF Energy = -767.161872108  
 Zero-point correction = 0.278736  
 Thermal correction to Energy = 0.296451  
 Thermal correction to Enthalpy = 0.297395  
 Thermal correction to Gibbs Free Energy = 0.232017  
 Sum of electronic and zero-point Energies = -766.883136  
 Sum of electronic and thermal Energies = -766.865421  
 Sum of electronic and thermal Enthalpies = -766.864477  
 Sum of electronic and thermal Free Energies = -766.929855

|   |              |              |              |
|---|--------------|--------------|--------------|
| C | -1.898135000 | 0.076353000  | 0.139099000  |
| C | -2.837817000 | 0.332781000  | 1.149168000  |
| C | -2.260102000 | -0.682057000 | -0.985082000 |
| C | -4.130493000 | -0.167136000 | 1.035799000  |
| C | -3.553948000 | -1.176642000 | -1.093626000 |
| C | -4.487717000 | -0.918943000 | -0.085493000 |
| H | -2.550314000 | 0.923227000  | 2.022903000  |
| H | -1.517538000 | -0.876910000 | -1.760770000 |
| H | -4.862230000 | 0.027437000  | 1.821687000  |
| H | -3.840268000 | -1.767576000 | -1.965449000 |
| H | -5.503520000 | -1.309659000 | -0.174935000 |
| C | -0.535068000 | 0.587291000  | 0.285623000  |
| O | 0.374238000  | 0.215784000  | -0.499201000 |
| H | -0.248408000 | 1.061478000  | 1.237410000  |
| B | 1.912296000  | 0.551486000  | -0.252924000 |
| F | 1.912356000  | 1.579618000  | 0.703045000  |
| F | 2.330191000  | 1.042496000  | -1.484520000 |
| C | -0.917080000 | 2.694605000  | -0.428464000 |
| H | -1.149880000 | 2.446777000  | -1.465698000 |
| H | -1.738316000 | 3.008170000  | 0.218777000  |
| H | 0.090869000  | 3.040486000  | -0.193993000 |
| C | 2.638376000  | -0.807227000 | 0.236642000  |
| C | 2.500385000  | -1.902292000 | -0.829667000 |
| C | 2.027246000  | -1.298351000 | 1.556232000  |
| H | 2.088039000  | -0.527678000 | 2.341380000  |
| H | 0.966315000  | -1.576842000 | 1.438837000  |
| H | 2.553725000  | -2.194481000 | 1.929324000  |

|   |             |              |              |
|---|-------------|--------------|--------------|
| H | 1.443640000 | -2.158874000 | -1.008057000 |
| H | 3.020296000 | -2.826749000 | -0.520966000 |
| H | 2.931684000 | -1.582236000 | -1.791288000 |
| C | 4.126760000 | -0.493144000 | 0.456501000  |
| H | 4.263602000 | 0.284950000  | 1.224372000  |
| H | 4.677904000 | -1.391173000 | 0.788219000  |
| H | 4.601645000 | -0.134505000 | -0.470639000 |

Transition state of the methyl radical addition to benzaldehyde/B(Me)<sub>3</sub> complex

SCF Energy = -529.480383318  
 Zero-point correction = 0.261823  
 Thermal correction to Energy = 0.277296  
 Thermal correction to Enthalpy = 0.278241  
 Thermal correction to Gibbs Free Energy = 0.219356  
 Sum of electronic and zero-point Energies = -529.218560  
 Sum of electronic and thermal Energies = -529.203087  
 Sum of electronic and thermal Enthalpies = -529.202143  
 Sum of electronic and thermal Free Energies = -529.261027

|   |              |              |              |
|---|--------------|--------------|--------------|
| C | 1.260182000  | 0.102727000  | -0.166347000 |
| C | 2.205957000  | 0.926450000  | -0.791253000 |
| C | 1.677186000  | -1.039099000 | 0.531629000  |
| C | 3.559553000  | 0.610584000  | -0.719402000 |
| C | 3.030777000  | -1.349290000 | 0.603298000  |
| C | 3.971594000  | -0.525417000 | -0.020585000 |
| H | 1.878110000  | 1.814669000  | -1.337528000 |
| H | 0.929667000  | -1.674963000 | 1.009239000  |
| H | 4.295658000  | 1.250120000  | -1.209872000 |
| H | 3.357613000  | -2.238402000 | 1.145874000  |
| H | 5.033801000  | -0.772327000 | 0.037347000  |
| C | -0.172782000 | 0.435616000  | -0.270846000 |
| O | -1.042461000 | -0.393981000 | 0.078956000  |
| H | -0.456524000 | 1.261817000  | -0.944968000 |
| B | -2.668181000 | -0.277629000 | -0.170193000 |
| C | -0.239355000 | 1.907127000  | 1.370369000  |
| H | 0.017106000  | 1.229778000  | 2.187141000  |
| H | 0.521382000  | 2.620608000  | 1.047783000  |
| H | -1.286685000 | 2.195137000  | 1.266609000  |
| C | -2.966364000 | 1.046735000  | -1.060750000 |
| H | -2.487794000 | 1.030886000  | -2.057287000 |
| H | -4.053726000 | 1.097829000  | -1.243870000 |
| H | -2.694278000 | 2.001657000  | -0.575401000 |
| C | -3.278358000 | -0.219634000 | 1.334415000  |
| H | -4.381341000 | -0.243992000 | 1.282280000  |
| H | -2.968325000 | -1.082370000 | 1.949880000  |
| H | -3.008619000 | 0.696253000  | 1.888904000  |
| C | -3.000434000 | -1.665057000 | -0.945051000 |
| H | -2.504575000 | -1.735043000 | -1.929698000 |
| H | -2.711233000 | -2.557645000 | -0.362773000 |
| H | -4.087379000 | -1.738470000 | -1.127219000 |

Transition state of the methyl radical addition to acetaldehyde/BF<sub>2</sub>Me complex

SCF Energy = -457.796361044  
 Zero-point correction = 0.139092  
 Thermal correction to Energy = 0.150032  
 Thermal correction to Enthalpy = 0.150977  
 Thermal correction to Gibbs Free Energy = 0.102117  
 Sum of electronic and zero-point Energies = -457.657269  
 Sum of electronic and thermal Energies = -457.646329  
 Sum of electronic and thermal Enthalpies = -457.645384  
 Sum of electronic and thermal Free Energies = -457.694245

|   |              |              |              |
|---|--------------|--------------|--------------|
| C | -1.190903000 | -0.518415000 | 0.265813000  |
| O | -0.186158000 | -0.524390000 | -0.477909000 |
| H | -1.059574000 | -0.217279000 | 1.317460000  |
| B | 1.248459000  | 0.073756000  | -0.018613000 |
| F | 0.973196000  | 0.802888000  | 1.143718000  |
| F | 1.563674000  | 0.930539000  | -1.062547000 |
| C | -1.934478000 | 1.637926000  | 0.000438000  |
| H | -2.065597000 | 1.598463000  | -1.082697000 |
| H | -2.824621000 | 1.611361000  | 0.632560000  |
| H | -1.028466000 | 2.098185000  | 0.396714000  |
| C | 2.217287000  | -1.178882000 | 0.185650000  |
| H | 2.309189000  | -1.780173000 | -0.732657000 |
| H | 3.228031000  | -0.835266000 | 0.460759000  |
| H | 1.863072000  | -1.843038000 | 0.990515000  |
| C | -2.409956000 | -1.265718000 | -0.137866000 |
| H | -2.552111000 | -1.231968000 | -1.225443000 |
| H | -2.244836000 | -2.316918000 | 0.155743000  |
| H | -3.301649000 | -0.907340000 | 0.388647000  |

Transition state of the methyl radical addition to acetophenone/BF<sub>2</sub>Me complex

SCF Energy = -688.616735887  
 Zero-point correction = 0.222744  
 Thermal correction to Energy = 0.237461  
 Thermal correction to Enthalpy = 0.238406  
 Thermal correction to Gibbs Free Energy = 0.180796  
 Sum of electronic and zero-point Energies = -688.393992  
 Sum of electronic and thermal Energies = -688.379274  
 Sum of electronic and thermal Enthalpies = -688.378330  
 Sum of electronic and thermal Free Energies = -688.435940

|   |              |              |               |
|---|--------------|--------------|---------------|
| C | -1.276808000 | -0.116592000 | -0.093711000  |
| C | -2.306226000 | -1.040967000 | -0.328550000  |
| C | -1.603837000 | 1.232002000  | 0.122450000   |
| C | -3.633345000 | -0.622015000 | -0.352195000  |
| C | -2.930442000 | 1.645624000  | 0.100604000   |
| C | -3.948761000 | 0.719595000  | -0.136044000  |
| H | -2.082670000 | -2.094681000 | -0.498042000  |
| H | -0.801889000 | 1.948663000  | 0.302273000   |
| H | -4.425730000 | -1.348600000 | -0.540717000  |
| H | -3.173470000 | 2.696825000  | 0.266786000   |
| H | -4.990960000 | 1.045070000  | -0.152735000  |
| C | 0.160810000  | -0.521665000 | -0.079166000  |
| O | 0.994847000  | 0.444236000  | -0.031497000  |
| B | 2.579217000  | 0.384556000  | -0.180035000  |
| F | 2.807580000  | -0.040104000 | -1.490681000  |
| F | 3.004703000  | -0.611643000 | 0.719913000   |
| C | 0.172869000  | -1.081433000 | 1.960926000   |
| H | -0.136349000 | -0.145874000 | 2.430418000   |
| H | -0.543434000 | -1.905036000 | 1.989230000   |
| H | 1.237596000  | -1.319683000 | 1.987857000   |
| C | 3.111577000  | 1.851543000  | 0.162167000   |
| H | 2.848447000  | 2.150000000  | 1.189892000   |
| H | 4.209500000  | 1.895276000  | 0.073936000   |
| H | 2.692330000  | 2.605591000  | -0.523447000  |
| C | 0.577264000  | -1.843576000 | -0.672849000  |
| H | 1.595246000  | -2.096532000 | -0.362006000  |
| H | -0.103677000 | -2.658710000 | -0.4609097000 |
| H | 0.571044000  | -1.718350000 | -1.767086000  |

Transition state of the methyl radical addition to acetone/BF<sub>2</sub>Me complex

SCF Energy = -497.079424726

Zero-point correction = 0.167826  
 Thermal correction to Energy = 0.179757  
 Thermal correction to Enthalpy = 0.180701  
 Thermal correction to Gibbs Free Energy = 0.130461  
 Sum of electronic and zero-point Energies = -496.911599  
 Sum of electronic and thermal Energies = -496.899668  
 Sum of electronic and thermal Enthalpies = -496.898723  
 Sum of electronic and thermal Free Energies = -496.948964  
 C 1.161540000 -0.263127000 0.233432000  
 O 0.029704000 0.041036000 0.727136000  
 B -1.396216000 -0.028013000 -0.000560000  
 F -1.585301000 -1.382030000 -0.281955000  
 F -1.237553000 0.688846000 -1.198937000  
 C 1.674981000 1.661260000 -0.575079000  
 H 1.671410000 2.252918000 0.342339000  
 H 2.645407000 1.439797000 -1.024818000  
 H 0.809607000 1.756240000 -1.232507000  
 C -2.445862000 0.609798000 1.019894000  
 H -2.203648000 1.660087000 1.249197000  
 H -3.461144000 0.588516000 0.591075000  
 H -2.475287000 0.056773000 1.972522000  
 C 1.268474000 -1.053828000 -1.042716000  
 H 0.574267000 -0.686692000 -1.805503000  
 H 2.297170000 -1.058849000 -1.420761000  
 H 0.978709000 -2.087419000 -0.793083000  
 C 2.284520000 -0.378924000 1.227387000  
 H 2.215401000 -1.391480000 1.659887000  
 H 3.270302000 -0.278884000 0.758478000  
 H 2.165019000 0.348357000 2.039401000

Transition state of the ethyl radical addition to benzaldehyde/BF<sub>2</sub>Me complex

SCF Energy = -688.623963045  
 Zero-point correction = 0.222713  
 Thermal correction to Energy = 0.237788  
 Thermal correction to Enthalpy = 0.238732  
 Thermal correction to Gibbs Free Energy = 0.179072  
 Sum of electronic and zero-point Energies = -688.401251  
 Sum of electronic and thermal Energies = -688.386175  
 Sum of electronic and thermal Enthalpies = -688.385231  
 Sum of electronic and thermal Free Energies = -688.444891  
 C -1.246588000 -0.316699000 0.258972000  
 C -2.181995000 -0.179532000 1.296033000  
 C -1.681430000 -0.547054000 -1.055450000  
 C -3.541770000 -0.270859000 1.020055000  
 C -3.042036000 -0.634330000 -1.325672000  
 C -3.970475000 -0.495680000 -0.290108000  
 H -1.837153000 -0.000384000 2.317597000  
 H -0.942482000 -0.656698000 -1.851009000  
 H -4.270890000 -0.167063000 1.825450000  
 H -3.384746000 -0.812546000 -2.346534000  
 H -5.038602000 -0.564793000 -0.506657000  
 C 0.178249000 -0.223666000 0.565964000  
 O 1.040357000 -0.503551000 -0.301393000  
 H 0.489298000 -0.135273000 1.617276000  
 B 2.615031000 -0.493598000 0.000750000  
 F 2.732979000 0.013851000 1.302891000  
 F 3.097022000 0.436972000 -0.917761000  
 C 0.311206000 2.137269000 0.580142000  
 H -0.574623000 2.348690000 1.186032000  
 H 1.264450000 2.085677000 1.113158000  
 C 3.138370000 -1.990831000 -0.187677000

H 2.928826000 -2.370346000 -1.200438000  
 H 4.228843000 -2.038697000 -0.033127000  
 H 2.670024000 -2.679742000 0.533671000  
 C 0.311038000 2.469378000 -0.862021000  
 H 1.134009000 1.961426000 -1.384371000  
 H -0.647111000 2.222533000 -1.343560000  
 H 0.464728000 3.558224000 -0.987690000

Transition state of the *iso*-propyl radical addition to benzaldehyde/BF<sub>2</sub>Me complex

SCF Energy = -727.909143121  
 Zero-point correction = 0.253001  
 Thermal correction to Energy = 0.268477  
 Thermal correction to Enthalpy = 0.269422  
 Thermal correction to Gibbs Free Energy = 0.209765  
 Sum of electronic and zero-point Energies = -727.656142  
 Sum of electronic and thermal Energies = -727.640666  
 Sum of electronic and thermal Enthalpies = -727.639721  
 Sum of electronic and thermal Free Energies = -727.699378  
 C 1.177658000 -0.228703000 -0.173551000  
 C 2.091589000 -0.052840000 -1.217951000  
 C 1.603048000 -0.805149000 1.028308000  
 C 3.419705000 -0.445491000 -1.060981000  
 C 2.930470000 -1.194904000 1.183642000  
 C 3.841507000 -1.013129000 0.140962000  
 H 1.762117000 0.383971000 -2.163956000  
 H 0.885739000 -0.954266000 1.837453000  
 H 4.125879000 -0.310530000 -1.882575000  
 H 3.256672000 -1.645885000 2.122980000  
 H 4.882343000 -1.319257000 0.265236000  
 C -0.247234000 0.194657000 -0.364504000  
 O -1.124230000 -0.472167000 0.376292000  
 H -0.552198000 0.275687000 -1.422905000  
 B -2.604069000 -0.724372000 -0.097906000  
 F -2.911543000 0.276592000 -1.023383000  
 F -3.365533000 -0.585230000 1.051188000  
 C -0.464550000 1.817152000 0.111050000  
 H -1.529721000 1.948732000 -0.114907000  
 C -0.191557000 1.985447000 1.589041000  
 H 0.862459000 1.791611000 1.836056000  
 H -0.410211000 3.030574000 1.858758000  
 H -0.830280000 1.334985000 2.200176000  
 C 0.381288000 2.698779000 -0.783281000  
 H 1.455664000 2.579922000 -0.584341000  
 H 0.189678000 2.520903000 -1.850499000  
 H 0.109119000 3.744100000 -0.566239000  
 C -2.547175000 -2.207800000 -0.727396000  
 H -1.873595000 -2.262320000 -1.596545000  
 H -2.230089000 -2.963392000 0.006463000  
 H -3.564202000 -2.466003000 -1.068242000

Transition state of the *tert*-butyl radical addition to benzaldehyde/BF<sub>2</sub>Me complex

SCF Energy = -767.186316164  
 Zero-point correction = 0.280964  
 Thermal correction to Energy = 0.297749  
 Thermal correction to Enthalpy = 0.298693  
 Thermal correction to Gibbs Free Energy = 0.236554  
 Sum of electronic and zero-point Energies = -766.905352  
 Sum of electronic and thermal Energies = -766.888567  
 Sum of electronic and thermal Enthalpies = -766.887623  
 Sum of electronic and thermal Free Energies = -766.949762

|   |              |              |              |
|---|--------------|--------------|--------------|
| C | 1.243035000  | -0.193742000 | -0.154399000 |
| C | 2.130601000  | -0.020865000 | -1.220822000 |
| C | 1.699281000  | -0.764607000 | 1.038063000  |
| C | 3.466201000  | -0.398994000 | -1.090842000 |
| C | 3.033962000  | -1.140137000 | 1.166565000  |
| C | 3.921117000  | -0.954101000 | 0.104590000  |
| H | 1.775365000  | 0.403204000  | -2.163101000 |
| H | 1.000935000  | -0.922211000 | 1.861696000  |
| H | 4.151517000  | -0.263554000 | -1.929932000 |
| H | 3.383429000  | -1.585899000 | 2.100083000  |
| H | 4.967213000  | -1.250124000 | 0.207254000  |
| C | -0.200885000 | 0.196204000  | -0.328341000 |
| O | -1.035960000 | -0.500780000 | 0.438925000  |
| H | -0.513806000 | 0.227217000  | -1.384977000 |
| B | -2.317903000 | -1.203072000 | -0.114241000 |
| F | -2.681284000 | -0.582876000 | -1.306372000 |
| F | -3.288442000 | -1.033446000 | 0.858558000  |
| C | -0.456341000 | 1.830971000  | 0.151834000  |
| C | 0.383464000  | 2.677424000  | -0.794097000 |
| H | 0.118761000  | 2.505891000  | -1.847569000 |
| H | 0.173699000  | 3.734828000  | -0.566246000 |
| H | 1.460410000  | 2.512406000  | -0.660348000 |
| C | -1.942208000 | 2.120642000  | -0.022484000 |
| H | -2.283080000 | 1.903268000  | -1.042983000 |
| H | -2.555138000 | 1.539976000  | 0.679175000  |
| H | -2.108624000 | 3.190635000  | 0.176254000  |
| C | -1.785703000 | -2.723869000 | -0.307389000 |
| H | -0.965757000 | -2.787330000 | -1.038377000 |
| H | -1.452335000 | -3.174761000 | 0.638089000  |
| H | -2.639190000 | -3.307563000 | -0.693392000 |
| C | -0.019279000 | 1.986677000  | 1.599207000  |
| H | -0.581272000 | 1.320004000  | 2.267177000  |
| H | 1.055977000  | 1.804179000  | 1.729684000  |
| H | -0.222846000 | 3.024714000  | 1.906324000  |

Product of the methyl radical addition to benzaldehyde

SCF Energy = -385.020924385  
 Zero-point correction = 0.148751  
 Thermal correction to Energy = 0.156792  
 Thermal correction to Enthalpy = 0.157736  
 Thermal correction to Gibbs Free Energy = 0.114911  
 Sum of electronic and zero-point Energies = -384.872173  
 Sum of electronic and thermal Energies = -384.864133  
 Sum of electronic and thermal Enthalpies = -384.863188  
 Sum of electronic and thermal Free Energies = -384.906013

|   |              |              |              |
|---|--------------|--------------|--------------|
| C | 0.177271000  | -0.073580000 | -0.202561000 |
| C | -0.625344000 | -1.209212000 | -0.346107000 |
| C | -0.419883000 | 1.148615000  | 0.113764000  |
| C | -2.006005000 | -1.126808000 | -0.168597000 |
| C | -1.800855000 | 1.233240000  | 0.291461000  |
| C | -2.597202000 | 0.096028000  | 0.152214000  |
| H | -0.167036000 | -2.169161000 | -0.602689000 |
| H | 0.208225000  | 2.036696000  | 0.210686000  |
| H | -2.623639000 | -2.020207000 | -0.285294000 |
| H | -2.258508000 | 2.194260000  | 0.537524000  |
| H | -3.678750000 | 0.162922000  | 0.289442000  |
| C | 1.687082000  | -0.179115000 | -0.362761000 |
| O | 2.307468000  | 0.983494000  | -0.675096000 |
| H | 1.934339000  | -0.947419000 | -1.127914000 |
| C | 2.354133000  | -0.677213000 | 0.953244000  |
| H | 2.155967000  | 0.038271000  | 1.762974000  |
| H | 1.917067000  | -1.648757000 | 1.219023000  |

|   |             |              |             |
|---|-------------|--------------|-------------|
| H | 3.437413000 | -0.786282000 | 0.813077000 |
|---|-------------|--------------|-------------|

Product of the methyl radical addition to acetaldehyde

SCF Energy = -193.485766127  
 Zero-point correction = 0.094346  
 Thermal correction to Energy = 0.099478  
 Thermal correction to Enthalpy = 0.100422  
 Thermal correction to Gibbs Free Energy = 0.066499  
 Sum of electronic and zero-point Energies = -193.391421  
 Sum of electronic and thermal Energies = -193.386288  
 Sum of electronic and thermal Enthalpies = -193.385344  
 Sum of electronic and thermal Free Energies = -193.419267

|   |              |              |              |
|---|--------------|--------------|--------------|
| C | 0.000097000  | 0.128132000  | 0.287375000  |
| H | -0.000355000 | 0.270125000  | 1.399819000  |
| O | -0.000443000 | 1.417859000  | -0.145110000 |
| C | -1.282212000 | -0.625594000 | -0.076765000 |
| H | -2.165081000 | -0.048609000 | 0.231616000  |
| H | -1.329170000 | -0.781914000 | -1.165443000 |
| H | -1.311466000 | -1.609562000 | 0.412786000  |
| C | 1.282533000  | -0.624988000 | -0.076739000 |
| H | 1.312266000  | -1.608940000 | 0.412853000  |
| H | 1.329485000  | -0.781451000 | -1.165408000 |
| H | 2.165351000  | -0.047827000 | 0.231434000  |

Product of the methyl radical addition to benzaldehyde/BF<sub>3</sub> complex

SCF Energy = -609.581880641  
 Zero-point correction = 0.163359  
 Thermal correction to Energy = 0.174261  
 Thermal correction to Enthalpy = 0.175206  
 Thermal correction to Gibbs Free Energy = 0.124849  
 Sum of electronic and zero-point Energies = -609.418522  
 Sum of electronic and thermal Energies = -609.407619  
 Sum of electronic and thermal Enthalpies = -609.406675  
 Sum of electronic and thermal Free Energies = -609.457032

|   |              |              |              |
|---|--------------|--------------|--------------|
| C | 0.667404000  | 0.418876000  | -0.063559000 |
| C | 1.619891000  | 0.486756000  | -1.083989000 |
| C | 0.953841000  | -0.322685000 | 1.087504000  |
| C | 2.842490000  | -0.171874000 | -0.956725000 |
| C | 2.173296000  | -0.986890000 | 1.213120000  |
| C | 3.121657000  | -0.911592000 | 0.192524000  |
| H | 1.401472000  | 1.057248000  | -1.990984000 |
| H | 0.213896000  | -0.384747000 | 1.888920000  |
| H | 3.577084000  | -0.113269000 | -1.762883000 |
| H | 2.384404000  | -1.566275000 | 2.114698000  |
| H | 4.076443000  | -1.432626000 | 0.291150000  |
| C | -0.635916000 | 1.183628000  | -0.189709000 |
| O | -1.709895000 | 0.457043000  | 0.413027000  |
| H | -0.858746000 | 1.321350000  | -1.260394000 |
| B | -2.232503000 | -0.633461000 | -0.157607000 |
| F | -1.843934000 | -1.084587000 | -1.345326000 |
| F | -3.190563000 | -1.299826000 | 0.471477000  |
| C | -0.572547000 | 2.543676000  | 0.485329000  |
| H | -0.358449000 | 2.426753000  | 1.557895000  |
| H | 0.224596000  | 3.150486000  | 0.034377000  |
| H | -1.529243000 | 3.072381000  | 0.368718000  |

Product of the methyl radical addition to benzaldehyde/BF<sub>2</sub>Ph complex

SCF Energy = -840.904207917  
 Zero-point correction = 0.252720  
 Thermal correction to Energy = 0.268765



Thermal correction to Enthalpy = 0.269710  
 Thermal correction to Gibbs Free Energy = 0.207565  
 Sum of electronic and zero-point Energies = -840.651488  
 Sum of electronic and thermal Energies = -840.635443  
 Sum of electronic and thermal Enthalpies = -840.634498  
 Sum of electronic and thermal Free Energies = -840.696643  
 C 1.209051000 1.112004000 0.050318000  
 C 2.142467000 1.133855000 -0.988818000  
 C 1.475026000 0.351754000 1.192641000  
 C 3.321308000 0.394468000 -0.895624000  
 C 2.648866000 -0.393200000 1.283667000  
 C 3.574404000 -0.375938000 0.239031000  
 H 1.937962000 1.720568000 -1.888789000  
 H 0.742177000 0.322750000 2.001501000  
 H 4.039228000 0.411418000 -1.718589000  
 H 2.840538000 -0.995396000 2.174586000  
 H 4.491855000 -0.964378000 0.309088000  
 C -0.074627000 1.910438000 -0.078660000  
 O -1.144071000 1.258160000 0.582913000  
 H -0.321085000 2.021335000 -1.146071000  
 B -2.238838000 0.600904000 -0.137392000  
 F -2.468475000 1.106650000 -1.398458000  
 F -3.368825000 0.545653000 0.640751000  
 C 0.046829000 3.298338000 0.549002000  
 H 0.277342000 3.213708000 1.620754000  
 H 0.858158000 3.852450000 0.056681000  
 H -0.890930000 3.857446000 0.424981000  
 C -1.363410000 -0.827643000 -0.144844000  
 C -0.573576000 -1.162882000 -1.259814000  
 C -1.398059000 -1.669238000 0.981828000  
 C 0.035668000 -2.409325000 -1.311930000  
 C -0.789179000 -2.916134000 0.921225000  
 C -0.068637000 -3.282328000 -0.221701000  
 H -0.475236000 -0.464722000 -2.093067000  
 H -1.929870000 -1.352502000 1.881090000  
 H 0.608970000 -2.700756000 -2.194005000  
 H -0.851929000 -3.598429000 1.771098000  
 H 0.438488000 -4.249030000 -0.254181000

Product of the methyl radical addition to benzaldehyde/BF<sub>2</sub>Me complex

SCF Energy = -609.581880641  
 Zero-point correction = 0.163359  
 Thermal correction to Energy = 0.174261  
 Thermal correction to Enthalpy = 0.175206  
 Thermal correction to Gibbs Free Energy = 0.124849  
 Sum of electronic and zero-point Energies = -609.418522  
 Sum of electronic and thermal Energies = -609.407619  
 Sum of electronic and thermal Enthalpies = -609.406675  
 Sum of electronic and thermal Free Energies = -609.457032  
 C 0.667404000 0.418876000 -0.063559000  
 C 1.619891000 0.486756000 -1.083989000  
 C 0.953841000 -0.322685000 1.087504000  
 C 2.842490000 -0.171874000 -0.956725000  
 C 2.173296000 -0.986890000 1.213120000  
 C 3.121657000 -0.911592000 0.192524000  
 H 1.401472000 1.057248000 -1.990984000  
 H 0.213896000 -0.384747000 1.888920000  
 H 3.577084000 -0.113269000 -1.762883000  
 H 2.384404000 -1.566275000 2.114698000  
 H 4.076443000 -1.432626000 0.291150000  
 C -0.635916000 1.183628000 -0.189709000

O -1.709895000 0.457043000 0.413027000  
 H -0.858746000 1.321350000 -1.260394000  
 B -2.232503000 -0.633461000 -0.157607000  
 F -1.843934000 -1.084587000 -1.345326000  
 F -3.190563000 -1.299826000 0.471477000  
 C -0.572547000 2.543676000 0.485329000  
 H -0.358449000 2.426753000 1.557895000  
 H 0.224596000 3.150486000 0.034377000  
 H -1.529243000 3.072381000 0.368718000

Product of the methyl radical addition to benzaldehyde/B(Me)<sub>3</sub> complex

SCF Energy = -489.741446534  
 Zero-point correction = 0.230852  
 Thermal correction to Energy = 0.243866  
 Thermal correction to Enthalpy = 0.244810  
 Thermal correction to Gibbs Free Energy = 0.190479  
 Sum of electronic and zero-point Energies = -489.510594  
 Sum of electronic and thermal Energies = -489.497581  
 Sum of electronic and thermal Enthalpies = -489.496637  
 Sum of electronic and thermal Free Energies = -489.550967  
 C -0.928230000 -0.233685000 0.025956000  
 C -1.880341000 -1.088037000 -0.540238000  
 C -1.317431000 1.051828000 0.413445000  
 C -3.199018000 -0.669433000 -0.712339000  
 C -2.635726000 1.473692000 0.238495000  
 C -3.580877000 0.615006000 -0.322890000  
 H -1.585594000 -2.093716000 -0.854123000  
 H -0.576429000 1.725674000 0.846918000  
 H -3.930213000 -1.347196000 -1.158773000  
 H -2.926103000 2.482141000 0.542446000  
 H -4.612357000 0.946948000 -0.460624000  
 C 0.485606000 -0.732302000 0.256748000  
 O 1.379784000 0.365229000 0.256195000  
 H 0.738677000 -1.422285000 -0.565448000  
 B 2.639914000 0.341448000 -0.263197000  
 C 0.604453000 -1.480996000 1.580943000  
 H 0.366807000 -0.806417000 2.416991000  
 H -0.093453000 -2.329891000 1.608144000  
 H 1.626713000 -1.864513000 1.716129000  
 C 3.480341000 1.671547000 -0.132961000  
 H 3.848806000 1.989469000 -1.123113000  
 H 2.922769000 2.502972000 0.322277000  
 H 4.382323000 1.479741000 0.474103000  
 C 3.224908000 -0.949983000 -0.973388000  
 H 4.290206000 -0.842057000 -1.222664000  
 H 3.105398000 -1.858804000 -0.361111000  
 H 2.682490000 -1.136954000 -1.917352000

Product of the methyl radical addition to acetaldehyde/BF<sub>2</sub>Me complex

SCF Energy = -418.047284590  
 Zero-point correction = 0.109414  
 Thermal correction to Energy = 0.117319  
 Thermal correction to Enthalpy = 0.118263  
 Thermal correction to Gibbs Free Energy = 0.076479  
 Sum of electronic and zero-point Energies = -417.937871  
 Sum of electronic and thermal Energies = -417.929966  
 Sum of electronic and thermal Enthalpies = -417.929022  
 Sum of electronic and thermal Free Energies = -417.970806  
 C -1.118781000 0.068465000 -0.252712000  
 O 0.072292000 -0.565038000 0.241106000

|   |              |              |              |
|---|--------------|--------------|--------------|
| H | -0.905704000 | 0.469755000  | -1.257340000 |
| B | 1.295527000  | -0.102641000 | -0.016603000 |
| F | 1.525190000  | 0.964716000  | -0.778565000 |
| F | 2.351328000  | -0.721806000 | 0.497499000  |
| C | -2.189471000 | -1.000260000 | -0.357427000 |
| H | -2.407134000 | -1.424444000 | 0.634447000  |
| H | -3.115789000 | -0.570493000 | -0.764204000 |
| H | -1.861651000 | -1.812738000 | -1.021076000 |
| C | -1.500608000 | 1.211753000  | 0.672633000  |
| H | -1.679445000 | 0.836248000  | 1.691565000  |
| H | -0.703708000 | 1.968605000  | 0.710668000  |
| H | -2.418039000 | 1.700631000  | 0.314740000  |

Product of the methyl radical addition to acetophenone/BF<sub>2</sub>Me complex

SCF Energy = -648.859716525

Zero-point correction = 0.191173

Thermal correction to Energy = 0.203241

Thermal correction to Enthalpy = 0.204185

Thermal correction to Gibbs Free Energy = 0.152368

Sum of electronic and zero-point Energies = -648.668543

Sum of electronic and thermal Energies = -648.656476

Sum of electronic and thermal Enthalpies = -648.655531

Sum of electronic and thermal Free Energies = -648.707349

|   |              |              |              |
|---|--------------|--------------|--------------|
| C | -0.691368000 | 0.384362000  | -0.105921000 |
| C | -1.647139000 | 0.751759000  | 0.845255000  |
| C | -1.008911000 | -0.634906000 | -1.013971000 |
| C | -2.888398000 | 0.114724000  | 0.890854000  |
| C | -2.244660000 | -1.275399000 | -0.966553000 |
| C | -3.191550000 | -0.901752000 | -0.012173000 |
| H | -1.434112000 | 1.540637000  | 1.567880000  |
| H | -0.277513000 | -0.934637000 | -1.768299000 |
| H | -3.620360000 | 0.415302000  | 1.643764000  |
| H | -2.469691000 | -2.070542000 | -1.680790000 |
| H | -4.161314000 | -1.402456000 | 0.027089000  |
| C | 0.661146000  | 1.091942000  | -0.219254000 |
| O | 1.678494000  | 0.119774000  | -0.540925000 |
| B | 1.980636000  | -0.948300000 | 0.201884000  |
| F | 1.391830000  | -1.248519000 | 1.355427000  |
| F | 2.932010000  | -1.772911000 | -0.222232000 |
| C | 0.638004000  | 2.051280000  | -1.409006000 |
| H | 0.411676000  | 1.507235000  | -2.336659000 |
| H | -0.132470000 | 2.820167000  | -1.259064000 |
| H | 1.615876000  | 2.542771000  | -1.517750000 |
| C | 1.079688000  | 1.831416000  | 1.050050000  |
| H | 0.432640000  | 2.700244000  | 1.230522000  |
| H | 1.040891000  | 1.177249000  | 1.931451000  |
| H | 2.107820000  | 2.199659000  | 0.925404000  |

Product of the methyl radical addition to acetone/BF<sub>2</sub>Me complex

SCF Energy = -457.326182353

Zero-point correction = 0.137027

Thermal correction to Energy = 0.146162

Thermal correction to Enthalpy = 0.147106

Thermal correction to Gibbs Free Energy = 0.103220

Sum of electronic and zero-point Energies = -457.189155

Sum of electronic and thermal Energies = -457.180020

Sum of electronic and thermal Enthalpies = -457.179076

Sum of electronic and thermal Free Energies = -457.222963

|   |              |              |             |
|---|--------------|--------------|-------------|
| C | -1.040951000 | -0.043562000 | 0.000020000 |
| O | 0.242937000  | -0.711637000 | 0.001175000 |

|   |              |              |              |
|---|--------------|--------------|--------------|
| B | 1.445684000  | -0.141589000 | 0.000282000  |
| F | 1.660270000  | 1.174393000  | -0.000297000 |
| F | 2.525590000  | -0.917658000 | 0.000337000  |
| C | -2.066883000 | -1.171131000 | 0.001700000  |
| H | -1.943861000 | -1.799784000 | 0.895461000  |
| H | -3.086589000 | -0.760729000 | -0.000152000 |
| H | -1.942215000 | -1.803774000 | -0.889024000 |
| C | -1.166584000 | 0.806026000  | 1.263040000  |
| H | -1.015693000 | 0.184130000  | 2.157734000  |
| H | -0.429337000 | 1.620719000  | 1.270035000  |
| H | -2.170033000 | 1.251788000  | 1.318023000  |
| C | -1.166159000 | 0.801626000  | -1.265903000 |
| H | -2.169201000 | 1.248160000  | -1.322087000 |
| H | -0.428168000 | 1.615645000  | -1.275809000 |
| H | -1.016095000 | 0.176524000  | -2.158493000 |

Product of the ethyl radical addition to benzaldehyde/BF<sub>2</sub>Me complex

SCF Energy = -648.858209411

Zero-point correction = 0.191890

Thermal correction to Energy = 0.204222

Thermal correction to Enthalpy = 0.205166

Thermal correction to Gibbs Free Energy = 0.151085

Sum of electronic and zero-point Energies = -648.666320

Sum of electronic and thermal Energies = -648.653987

Sum of electronic and thermal Enthalpies = -648.653043

Sum of electronic and thermal Free Energies = -648.707125

|   |              |              |              |
|---|--------------|--------------|--------------|
| C | -0.801494000 | 0.298826000  | 0.084620000  |
| C | -1.729235000 | 0.576180000  | 1.092827000  |
| C | -1.234037000 | -0.340264000 | -1.081804000 |
| C | -3.069620000 | 0.224808000  | 0.938307000  |
| C | -2.573293000 | -0.697385000 | -1.235001000 |
| C | -3.494881000 | -0.414161000 | -0.226701000 |
| H | -1.398480000 | 1.068595000  | 2.011511000  |
| H | -0.515068000 | -0.564213000 | -1.873068000 |
| H | -3.783677000 | 0.444134000  | 1.735152000  |
| H | -2.898927000 | -1.199470000 | -2.148777000 |
| H | -4.543459000 | -0.694989000 | -0.346921000 |
| C | 0.639601000  | 0.738270000  | 0.241892000  |
| O | 1.521070000  | -0.185311000 | -0.399720000 |
| H | 0.883435000  | 0.771902000  | 1.317510000  |
| B | 1.840772000  | -1.359954000 | 0.151970000  |
| F | 1.413641000  | -1.734309000 | 1.353125000  |
| F | 2.626463000  | -2.196876000 | -0.511308000 |
| C | 0.891201000  | 2.116772000  | -0.361344000 |
| H | 0.649028000  | 2.069708000  | -1.436067000 |
| H | 0.168667000  | 2.812450000  | 0.093341000  |
| C | 2.314720000  | 2.616332000  | -0.152350000 |
| H | 2.555273000  | 2.689489000  | 0.919916000  |
| H | 3.042881000  | 1.936125000  | -0.617039000 |
| H | 2.449207000  | 3.612931000  | -0.596675000 |

Product of the *iso*-propyl radical addition to benzaldehyde/BF<sub>2</sub>Me complex

SCF Energy = -688.135344696

Zero-point correction = 0.219887

Thermal correction to Energy = 0.233571

Thermal correction to Enthalpy = 0.234515

Thermal correction to Gibbs Free Energy = 0.177703

Sum of electronic and zero-point Energies = -687.915458

Sum of electronic and thermal Energies = -687.901774

Sum of electronic and thermal Enthalpies = -687.900830

Sum of electronic and thermal Free Energies = -687.957641

|   |              |              |              |
|---|--------------|--------------|--------------|
| C | -0.787624000 | 0.102215000  | 0.065702000  |
| C | -1.652589000 | 0.111782000  | 1.162333000  |
| C | -1.288165000 | -0.248559000 | -1.193508000 |
| C | -3.000609000 | -0.211715000 | 1.005174000  |
| C | -2.632864000 | -0.577249000 | -1.351727000 |
| C | -3.493488000 | -0.556740000 | -0.252583000 |
| H | -1.267695000 | 0.374645000  | 2.151161000  |
| H | -0.616353000 | -0.270958000 | -2.055064000 |
| H | -3.666331000 | -0.200288000 | 1.870929000  |
| H | -3.012422000 | -0.851279000 | -2.338590000 |
| H | -4.547534000 | -0.814489000 | -0.376899000 |
| C | 0.667427000  | 0.486895000  | 0.227494000  |
| O | 1.496130000  | -0.478585000 | -0.427068000 |
| H | 0.913597000  | 0.497501000  | 1.303743000  |
| B | 1.734975000  | -1.681268000 | 0.103340000  |
| F | 1.281817000  | -2.047729000 | 1.297756000  |
| F | 2.464403000  | -2.557516000 | -0.573790000 |
| C | 1.010572000  | 1.864291000  | -0.356680000 |
| H | 0.800691000  | 1.809055000  | -1.439695000 |
| C | 2.493770000  | 2.178323000  | -0.165257000 |
| H | 2.743197000  | 2.238443000  | 0.907157000  |
| H | 3.130070000  | 1.408179000  | -0.621758000 |
| H | 2.745784000  | 3.146371000  | -0.623064000 |
| C | 0.131081000  | 2.954208000  | 0.253535000  |
| H | -0.936119000 | 2.785786000  | 0.049860000  |
| H | 0.264676000  | 3.001389000  | 1.347132000  |
| H | 0.403486000  | 3.937159000  | -0.157653000 |

Product of the *tert*-butyl radical addition to benzaldehyde/BF<sub>2</sub>Me complex

SCF Energy = -727.412232413

Zero-point correction = 0.247992

Thermal correction to Energy = 0.262817

Thermal correction to Enthalpy = 0.263761

Thermal correction to Gibbs Free Energy = 0.205175

Sum of electronic and zero-point Energies = -727.164240

Sum of electronic and thermal Energies = -727.149416

Sum of electronic and thermal Enthalpies = -727.148471

Sum of electronic and thermal Free Energies = -727.207057

|   |              |              |              |
|---|--------------|--------------|--------------|
| C | 0.875545000  | 0.022332000  | -0.143579000 |
| C | 1.791986000  | 0.296268000  | -1.163831000 |
| C | 1.350687000  | -0.473559000 | 1.075618000  |
| C | 3.157837000  | 0.099788000  | -0.965604000 |
| C | 2.715799000  | -0.676016000 | 1.274256000  |
| C | 3.624000000  | -0.385554000 | 0.256148000  |
| H | 1.432235000  | 0.664655000  | -2.127951000 |
| H | 0.644245000  | -0.708815000 | 1.873996000  |
| H | 3.860030000  | 0.318107000  | -1.773138000 |
| H | 3.071717000  | -1.064300000 | 2.231112000  |
| H | 4.693173000  | -0.545161000 | 0.411802000  |
| C | -0.603436000 | 0.267704000  | -0.366773000 |
| O | -1.366083000 | -0.718411000 | 0.329189000  |
| H | -0.804517000 | 0.172402000  | -1.447414000 |
| B | -1.531463000 | -1.955325000 | -0.146646000 |
| F | -1.051852000 | -2.348361000 | -1.321940000 |
| F | -2.211548000 | -2.840998000 | 0.568460000  |
| C | -1.121549000 | 1.664791000  | 0.067446000  |
| C | -2.614628000 | 1.744132000  | -0.283376000 |
| H | -2.777821000 | 1.581884000  | -1.360955000 |
| H | -3.195415000 | 0.991657000  | 0.268269000  |
| H | -3.013136000 | 2.737799000  | -0.028157000 |

|   |              |             |              |
|---|--------------|-------------|--------------|
| C | -0.365614000 | 2.748896000 | -0.709900000 |
| H | 0.703701000  | 2.767124000 | -0.452718000 |
| H | -0.453803000 | 2.600972000 | -1.798309000 |
| H | -0.785379000 | 3.737958000 | -0.471979000 |
| C | -0.934551000 | 1.881216000 | 1.573298000  |
| H | -1.432686000 | 1.090333000 | 2.153033000  |
| H | 0.129792000  | 1.896695000 | 1.851643000  |
| H | -1.372009000 | 2.846845000 | 1.869590000  |

Product of the benzaldehyde/BCl<sub>2</sub>(O<sub>2</sub>Me) complex rearrangement

SCF Energy = -1330.17796611

Zero-point correction = 0.160147

Thermal correction to Energy = 0.171748

Thermal correction to Enthalpy = 0.172692

Thermal correction to Gibbs Free Energy = 0.119811

Sum of electronic and zero-point Energies = -1330.017819

Sum of electronic and thermal Energies = -1330.006218

Sum of electronic and thermal Enthalpies = -1330.005274

Sum of electronic and thermal Free Energies = -1330.058155

|    |              |              |              |
|----|--------------|--------------|--------------|
| C  | -1.225086000 | 0.438378000  | 0.153892000  |
| C  | -2.116929000 | -0.111952000 | 1.077515000  |
| C  | -1.446486000 | 0.237232000  | -1.212910000 |
| C  | -3.220388000 | -0.846976000 | 0.644102000  |
| C  | -2.544657000 | -0.503106000 | -1.646840000 |
| C  | -3.435932000 | -1.044870000 | -0.719329000 |
| H  | -1.943889000 | 0.030109000  | 2.147662000  |
| H  | -0.749506000 | 0.657072000  | -1.942297000 |
| H  | -3.909492000 | -1.274018000 | 1.375957000  |
| H  | -2.706147000 | -0.657923000 | -2.715910000 |
| H  | -4.296114000 | -1.625303000 | -1.059942000 |
| C  | -0.057520000 | 1.276250000  | 0.632845000  |
| O  | 1.119644000  | 0.970072000  | -0.129233000 |
| H  | 0.141407000  | 1.035299000  | 1.688973000  |
| B  | 1.880730000  | -0.107917000 | 0.024161000  |
| C  | -0.309876000 | 2.767216000  | 0.492603000  |
| H  | -0.496242000 | 3.028139000  | -0.559415000 |
| H  | -1.191102000 | 3.051450000  | 1.083889000  |
| H  | 0.557296000  | 3.338113000  | 0.853515000  |
| Cl | 3.252949000  | -0.324666000 | -1.072324000 |
| Cl | 1.592594000  | -1.326920000 | 1.278757000  |

Synglet oxygen

SCF Energy = -150.093247741

Zero-point correction = 0.004013

Thermal correction to Energy = 0.006375

Thermal correction to Enthalpy = 0.007319

Thermal correction to Gibbs Free Energy = -0.014892

Sum of electronic and zero-point Energies = -150.089235

Sum of electronic and thermal Energies = -150.086873

Sum of electronic and thermal Enthalpies = -150.085929

Sum of electronic and thermal Free Energies = -150.108139

|   |             |             |              |
|---|-------------|-------------|--------------|
| O | 0.000000000 | 0.000000000 | 0.595397000  |
| O | 0.000000000 | 0.000000000 | -0.595397000 |

Methyl radical

SCF Energy = -39.7929753480

Zero-point correction = 0.029506

Thermal correction to Energy = 0.032608

Thermal correction to Enthalpy = 0.033552

Thermal correction to Gibbs Free Energy = 0.009662

Sum of electronic and zero-point Energies = -39.763470

Sum of electronic and thermal Energies = -39.760367  
 Sum of electronic and thermal Enthalpies = -39.759423  
 Sum of electronic and thermal Free Energies = -39.783313  
 C -0.000076000 -0.000029000 -0.000118000  
 H 0.463536000 0.987426000 0.000235000  
 H 0.624094000 -0.894670000 0.000235000  
 H -1.087174000 -0.092580000 0.000235000

#### Ethyl radical

SCF Energy = -79.0727068688  
 Zero-point correction = 0.059203  
 Thermal correction to Energy = 0.063173  
 Thermal correction to Enthalpy = 0.064117  
 Thermal correction to Gibbs Free Energy = 0.035073  
 Sum of electronic and zero-point Energies = -79.013504  
 Sum of electronic and thermal Energies = -79.009534  
 Sum of electronic and thermal Enthalpies = -79.008590  
 Sum of electronic and thermal Free Energies = -79.037634  
 C 0.011918000 0.793445000 0.000000000  
 H -0.071532000 1.352945000 0.935434000  
 H -0.071532000 1.352945000 -0.935434000  
 C 0.011918000 -0.692318000 0.000000000  
 H 0.508888000 -1.104011000 0.892609000  
 H 0.508888000 -1.104011000 -0.892609000  
 H -1.017726000 -1.104629000 0.000000000

#### iso-Propyl radical

SCF Energy = -118.353762184  
 Zero-point correction = 0.087983  
 Thermal correction to Energy = 0.093160  
 Thermal correction to Enthalpy = 0.094104  
 Thermal correction to Gibbs Free Energy = 0.060757  
 Sum of electronic and zero-point Energies = -118.265779  
 Sum of electronic and thermal Energies = -118.260602  
 Sum of electronic and thermal Enthalpies = -118.259658  
 Sum of electronic and thermal Free Energies = -118.293006  
 C 0.011931000 0.535518000 0.000000000  
 H -0.238042000 1.601621000 0.000000000  
 C 0.011931000 -0.197377000 1.296577000  
 C 0.011931000 -0.197377000 -1.296577000  
 H 0.231708000 0.465017000 -2.146995000  
 H 0.750703000 -1.017900000 -1.298302000  
 H -0.970771000 -0.670216000 -1.502561000  
 H 0.750703000 -1.017900000 1.298302000  
 H -0.970771000 -0.670216000 1.502561000  
 H 0.231708000 0.465017000 2.146995000

#### tert-Butyl radical

SCF Energy = -157.635313765  
 Zero-point correction = 0.116610  
 Thermal correction to Energy = 0.122973  
 Thermal correction to Enthalpy = 0.123917  
 Thermal correction to Gibbs Free Energy = 0.087153  
 Sum of electronic and zero-point Energies = -157.518704  
 Sum of electronic and thermal Energies = -157.512341  
 Sum of electronic and thermal Enthalpies = -157.511397  
 Sum of electronic and thermal Free Energies = -157.548160  
 C 0.000000000 -0.000005000 -0.152649000  
 C 1.286351000 -0.741610000 0.014783000  
 C -1.285455000 -0.743162000 0.014783000  
 H -2.133253000 -0.201409000 -0.434923000  
 H -1.239103000 -1.748148000 -0.435118000

H -1.537540000 -0.889202000 1.086593000  
 H 1.241212000 -1.746652000 -0.435118000  
 H 1.538612000 -0.887346000 1.086593000  
 H 2.133494000 -0.198834000 -0.434923000  
 C -0.000896000 1.484782000 0.014792000  
 H -0.894467000 1.947156000 -0.434972000  
 H -0.001072000 1.776175000 1.086586000  
 H 0.892115000 1.948234000 -0.434972000

#### Tetrafluoroborate anion

Energy = -424.163284284  
 Zero-point correction = 0.014509  
 Thermal correction to Energy = 0.018839  
 Thermal correction to Enthalpy = 0.019783  
 Thermal correction to Gibbs Free Energy = -0.010723  
 Sum of electronic and zero-point Energies = -424.148775  
 Sum of electronic and thermal Energies = -424.144445  
 Sum of electronic and thermal Enthalpies = -424.143501  
 Sum of electronic and thermal Free Energies = -424.174007  
 B 0.000000000 0.000000000 0.000000000  
 F 0.810590000 0.810590000 0.810590000  
 F -0.810590000 -0.810590000 0.810590000  
 F -0.810590000 0.810590000 -0.810590000  
 F 0.810590000 -0.810590000 -0.810590000

#### iso-Propyltrifluoroborate anion

Energy = -442.779752299  
 Zero-point correction = 0.105131  
 Thermal correction to Energy = 0.113194  
 Thermal correction to Enthalpy = 0.114138  
 Thermal correction to Gibbs Free Energy = 0.072773  
 Sum of electronic and zero-point Energies = -442.674621  
 Sum of electronic and thermal Energies = -442.666559  
 Sum of electronic and thermal Enthalpies = -442.665615  
 Sum of electronic and thermal Free Energies = -442.706980  
 B 0.103805000 -0.688872000 0.000000000  
 F -0.264088000 -1.448798000 1.148881000  
 F -0.264088000 -1.448798000 -1.148881000  
 F 1.526588000 -0.577259000 0.000000000  
 C -0.609382000 0.774143000 0.000000000  
 H -1.704264000 0.601002000 0.000000000  
 C -0.264088000 1.569013000 -1.260914000  
 C -0.264088000 1.569013000 1.260914000  
 H -0.554793000 1.020595000 2.170824000  
 H 0.824026000 1.743194000 1.323015000  
 H -0.756797000 2.558229000 1.292150000  
 H 0.824026000 1.743194000 -1.323015000  
 H -0.756797000 2.558229000 -1.292150000  
 H -0.554793000 1.020595000 -2.170824000

#### Boron trifluoride / diethyl ether complex

Energy = -557.681392814  
 Zero-point correction = 0.152978  
 Thermal correction to Energy = 0.163597  
 Thermal correction to Enthalpy = 0.164542  
 Thermal correction to Gibbs Free Energy = 0.116455  
 Sum of electronic and zero-point Energies = -557.528415  
 Sum of electronic and thermal Energies = -557.517795  
 Sum of electronic and thermal Enthalpies = -557.516851  
 Sum of electronic and thermal Free Energies = -557.564938  
 B 1.195916000 -0.156567000 -0.103353000  
 O -0.252735000 -0.054984000 0.586094000

|   |              |              |              |
|---|--------------|--------------|--------------|
| F | 1.816827000  | 1.012983000  | 0.243550000  |
| F | 1.767620000  | -1.273002000 | 0.447856000  |
| F | 0.974697000  | -0.280466000 | -1.451910000 |
| H | -2.796929000 | -0.539967000 | -0.532070000 |
| C | -0.870412000 | 1.238807000  | 0.804771000  |
| C | -1.103157000 | 2.004777000  | -0.478070000 |
| H | -0.195757000 | 1.779481000  | 1.478855000  |
| H | -1.807134000 | 1.038610000  | 1.341486000  |
| H | -1.749432000 | 1.453637000  | -1.173393000 |
| H | -1.594045000 | 2.957039000  | -0.231037000 |
| H | -0.152646000 | 2.229478000  | -0.978209000 |
| C | -1.092056000 | -1.233810000 | 0.630510000  |
| C | -2.039705000 | -1.336571000 | -0.542238000 |
| H | -1.621799000 | -1.203283000 | 1.593073000  |
| H | -0.384517000 | -2.069336000 | 0.657592000  |
| H | -1.488259000 | -1.298804000 | -1.491093000 |
| H | -2.567505000 | -2.299003000 | -0.482505000 |

#### Difluoro(*iso*-propyl)boran / diethyl ether complex

Energy = -576.299767042  
 Zero-point correction = 0.244777  
 Thermal correction to Energy = 0.258820  
 Thermal correction to Enthalpy = 0.259765  
 Thermal correction to Gibbs Free Energy = 0.204967  
 Sum of electronic and zero-point Energies = -576.054991  
 Sum of electronic and thermal Energies = -576.040947  
 Sum of electronic and thermal Enthalpies = -576.040002  
 Sum of electronic and thermal Free Energies = -576.094800

|   |              |              |              |
|---|--------------|--------------|--------------|
| B | 0.521822000  | 0.049310000  | 0.662490000  |
| O | -1.061305000 | 0.137787000  | -0.003444000 |
| F | 0.523015000  | 1.116562000  | 1.544211000  |
| F | 0.475350000  | -1.153167000 | 1.342642000  |
| H | -1.931319000 | -1.901306000 | -1.548668000 |
| C | -1.676683000 | 1.440701000  | -0.136501000 |
| C | -0.820981000 | 2.405986000  | -0.919883000 |
| H | -1.898355000 | 1.823685000  | 0.871169000  |
| H | -2.625073000 | 1.273971000  | -0.664749000 |
| H | -0.543699000 | 1.984932000  | -1.896512000 |
| H | -1.410206000 | 3.317764000  | -1.093117000 |
| C | 0.087122000  | 2.685347000  | -0.372814000 |
| C | -1.988817000 | -0.913308000 | 0.373511000  |
| C | -1.788869000 | -2.138523000 | -0.484749000 |
| H | -2.998563000 | -0.504985000 | 0.239391000  |
| H | -1.845203000 | -1.131219000 | 1.439207000  |
| H | -0.786082000 | -2.559624000 | -0.342360000 |
| H | -2.528129000 | -2.900006000 | -0.196877000 |
| C | 1.591513000  | 0.113504000  | -0.528315000 |
| H | 1.546352000  | 1.116821000  | -0.983013000 |
| C | 1.336641000  | -0.912902000 | -1.633441000 |
| C | 2.999109000  | -0.054859000 | 0.062248000  |
| H | 3.210578000  | 0.703070000  | 0.832658000  |
| H | 3.114373000  | -1.045497000 | 0.531984000  |
| H | 3.776534000  | 0.033462000  | -0.714913000 |
| H | 1.370303000  | -1.941230000 | -1.236455000 |
| H | 2.096498000  | -0.846563000 | -2.429915000 |
| H | 0.349441000  | -0.771623000 | -2.098813000 |

#### Diethyl ether

Energy = -233.422367899  
 Zero-point correction = 0.137071  
 Thermal correction to Energy = 0.143862  
 Thermal correction to Enthalpy = 0.144807  
 Thermal correction to Gibbs Free Energy = 0.107571  
 Sum of electronic and zero-point Energies = -233.285297  
 Sum of electronic and thermal Energies = -233.278506  
 Sum of electronic and thermal Enthalpies = -233.277561  
 Sum of electronic and thermal Free Energies = -233.314797

|   |              |              |              |
|---|--------------|--------------|--------------|
| O | 0.000000000  | 0.000000000  | 0.255102000  |
| H | -0.891543000 | 2.366096000  | 1.055112000  |
| C | 0.000000000  | -1.174577000 | -0.512281000 |
| C | 0.000000000  | -2.373969000 | 0.410886000  |
| H | 0.888836000  | -1.199216000 | -1.175637000 |
| H | -0.888836000 | -1.199216000 | -1.175637000 |
| H | -0.891543000 | -2.366096000 | 1.055112000  |
| H | 0.000000000  | -3.306877000 | -0.170988000 |
| H | 0.891543000  | -2.366096000 | 1.055112000  |
| C | 0.000000000  | 1.174577000  | -0.512281000 |
| C | 0.000000000  | 2.373969000  | 0.410886000  |
| H | -0.888836000 | 1.199216000  | -1.175637000 |
| H | 0.888836000  | 1.199216000  | -1.175637000 |
| H | 0.891543000  | 2.366096000  | 1.055112000  |
| H | 0.000000000  | 3.306877000  | -0.170988000 |

#### (Difluoroboryloxy)benzyl radical

Energy = -569.653829369  
 Zero-point correction = 0.121384  
 Thermal correction to Energy = 0.130884  
 Thermal correction to Enthalpy = 0.131829  
 Thermal correction to Gibbs Free Energy = 0.084333  
 Sum of electronic and zero-point Energies = -569.532445  
 Sum of electronic and thermal Energies = -569.522945  
 Sum of electronic and thermal Enthalpies = -569.522001  
 Sum of electronic and thermal Free Energies = -569.569496

|   |              |              |              |
|---|--------------|--------------|--------------|
| C | -0.823371000 | 0.285831000  | -0.000075000 |
| C | -1.822997000 | 1.297664000  | -0.000052000 |
| C | -1.242549000 | -1.072504000 | 0.000046000  |
| C | -3.167637000 | 0.961532000  | 0.000003000  |
| C | -2.593039000 | -1.390352000 | 0.000104000  |
| C | -3.565090000 | -0.382360000 | 0.000061000  |
| H | -1.520803000 | 2.348028000  | -0.000086000 |
| H | -0.489538000 | -1.862143000 | 0.000092000  |
| H | -3.921332000 | 1.752211000  | -0.000012000 |
| H | -2.898572000 | -2.439251000 | 0.000171000  |
| H | -4.625736000 | -0.641423000 | 0.000093000  |
| C | 0.538062000  | 0.649816000  | -0.000160000 |
| O | 1.487656000  | -0.322790000 | -0.000189000 |
| H | 0.880586000  | 1.686796000  | -0.000283000 |
| B | 2.816330000  | -0.090765000 | 0.000058000  |
| F | 3.639613000  | -1.121673000 | -0.000070000 |
| F | 3.321744000  | 1.132136000  | 0.000257000  |

## References

1. Kosobokov, M. D.; Zubkov, M. O.; Levin, V. V.; Kokorekin, V. A.; A. D. Dilman, A. D., Fluoroalkyl sulfides as photoredox-active coupling reagents for alkene difunctionalization. *Chem. Commun.* **2020**, *56*, 9453–9456.
2. Wang, W.; Zhou, R.; Jiang, Z.-J.; Wang, K.; Fu, H.-Y.; Zheng, X.-L.; Chen, H.; Li, R.-X., An Efficient Palladium-Catalyzed Synthesis of Cinnamyl Ethers from Aromatic Halides, Phenols, and Allylic Chloride. *Adv. Synth. Catal.* **2014**, *356*, 616-622.
3. Di Noja, S.; Garrido, M.; Gualandi, L.; Ragazzon, G., Control over Dethreading Kinetics Allows Evaluating the Entropy Stored in an Interlocked Molecular Machine Out-of-Equilibrium. *Chem. Eur. J.* **2023**, *29*, e202300295.
4. Yin, G.; Li, Y.; Li, S.; Xu, B.; Yang, Q.; Zhang, Y.; Zhao, J.; Cao, X., Hexaphenylbenzene based push-pull fluorophores displaying intriguing polarity-dependent fluorescence behavior, AIE(E) characteristics and mega-large Stokes shifts. *Dyes Pigm.* **2022**, *198*, 110013.
5. Singh, P.; Kaur, M.; Holzer, W., Synthesis and evaluation of indole, pyrazole, chromone and pyrimidine based conjugates for tumor growth inhibitory activities – Development of highly efficacious cytotoxic agents. *Eur. J. Med. Chem.* **2010**, *45*, 4968-4982.
6. Rostoll-Berenguer, J.; Blay, G.; Pedro, J. R.; Vila, C., Photocatalytic Giese Addition of 1,4-Dihydroquinoxalin-2-ones to Electron-Poor Alkenes Using Visible Light. *Org. Lett.* **2020**, *22*, 8012-8017.
7. Zhang, Y.; Ji, P.; Hu, W.; Wei, Y.; Huang, H.; Wang, W., Organocatalytic Transformation of Aldehydes to Thioesters with Visible Light. *Chem. Eur. J.* **2019**, *25*, 8225-8228.
8. Manthou, V. S.; Perganti, D.; Rotas, G.; Falaras, P.; Vougioukalakis, G. C., 5-Alkyl-8-hydroxyquinolines: Synthesis and Application in Dye-Sensitized Solar Cells. *Synlett* **2017**, *28*, 929-933.
9. Chauhan, J.; Ravva, M. K.; Sen, S., Harnessing Autoxidation of Aldehydes: In Situ Iodoarene Catalyzed Synthesis of Substituted 1,3,4-Oxadiazole, in the Presence of Molecular Oxygen. *Org. Lett.* **2019**, *21*, 6562-6565.
10. Liu, X.; Liu, H.; Bian, C.; Wang, K.-H.; Wang, J.; Huang, D.; Su, Y.; Lv, X.; Hu, Y., Synthesis of 3-Trifluoromethyl-1,2,4-triazolines and 1,2,4-Triazoles via Tandem Addition/Cyclization of Trifluoromethyl N-Acylhydrazones with Cyanamide. *J. Org. Chem.* **2022**, *87*, 5882-5892.
11. Dmitriev, I. A.; Levin, V. V.; Dilman, A. D., Boron Chelates Derived from N-Acylhydrazones as Radical Acceptors: Photocatalyzed Coupling of Hydrazones with Carboxylic Acids. *Org. Lett.* **2021**, *23*, 8973-8977.
12. Hopper, A. T.; Sibley, L. D.; Janetka, J. W.; Helander, J., CDPK1 inhibitors, compositions, and methods related thereto. *U.S. Patent No. 11,518,761*, **2022**, Washington, DC: U.S. Patent and Trademark Office.
13. Lerebours, R.; Wolf, C., Chemoselective Nucleophilic Arylation and Single-Step Oxidative Esterification of Aldehydes Using Siloxanes and a Palladium–Phosphinous Acid as a Reaction Switch. *J. Am. Chem. Soc.* **2006**, *128*, 13052-13053.
14. Li, M.; Li, B.; Xia, H.-F.; Ye, D.; Wu, J.; Shi, Y., Mesoporous silica KIT-6 supported superparamagnetic CuFe<sub>2</sub>O<sub>4</sub> nanoparticles for catalytic asymmetric hydrosilylation of ketones in air. *Green Chem.* **2014**, *16*, 2680-2688.
15. Shen, Z.-L.; Yeo, Y.-L.; Loh, T.-P., Indium–Copper and Indium–Silver Mediated Barbier–Grignard-Type Alkylation Reaction of Aldehydes Using Unactivated Alkyl Halides in Water. *J. Org. Chem.* **2008**, *73*, 3922-3924.
16. Liu, Z.; Kole, G. K.; Budiman, Y. P.; Tian, Y.-M.; Friedrich, A.; Luo, X.; Westcott, S. A.; Radius, U.; Marder, T. B., Transition Metal Catalyst-Free, Base-Promoted 1,2-Additions of Polyfluorophenylboronates to Aldehydes and Ketones. *Angew. Chem. Int. Ed.* **2021**, *60*, 16529-16538.
17. Wu, H.; Li, X.; Yang, L.; Chen, W.; Zou, C.; Deng, W.; Wang, Z.; Hu, J.; Li, Y.; Huang, Y., Cathodic Carbonyl Alkylation of Aryl Ketones or Aldehydes with Unactivated Alkyl Halides. *Org. Lett.* **2022**, *24*, 9342-9347.
18. Yahata, K.; Sakurai, S.; Hori, S.; Yoshioka, S.; Kaneko, Y.; Hasegawa, K.; Akai, S., Coupling Reaction between Aldehydes and Non-Activated Hydrocarbons via the Reductive Radical-Polar Crossover Pathway. *Org. Lett.* **2020**, *22*, 1199-1203.
19. Peng, P.; Zhong, Y.; Zhou, C.; Tao, Y.; Li, D.; Lu, Q., Unlocking the Nucleophilicity of Strong Alkyl C–H Bonds via Cu/Cr Catalysis. *ACS Cent. Sci.* **2023**, *9*, 756-762.

20. Dhiman, S.; Ramasastry, S. S. V., Acid Catalyzed Ring Transformation of Benzofurans to Tri- and Tetrasubstituted Furans. *J. Org. Chem.* **2013**, *78*, 10427-10436.
21. Satpathi, B.; Dhiman, S.; Ramasastry, S. S. V., Synthesis of 1,2,3-Trisubstituted Cyclopentannulated Benzothiophenes through an Acid-Mediated, Solvent-Free, One-Pot Domino Process. *Eur. J. Org. Chem.* **2014**, *2014*, 2022-2026.
22. Almansa, R.; Guijarro, D.; Yus, M., Nickel-accelerated addition of dialkylzinc reagents to aldehydes. Application to enantioselective synthesis. *ARKIVOC* **2006**, *2006*, 18-28.
23. Almeida, A. R.; Dias, R. D.; Monteiro, C. J. P.; Abreu, A. R.; Gois, P. M. P.; Bayon, J. C.; Pereira, M. M., Rhodium-Catalysed Tandem Hydroformylation/Arylation Reaction with Boronic Acids. *Adv. Synth. Catal.* **2014**, *356*, 1223-1228.
24. Lamani, M.; Ravikumara, G. S.; Prabhu, K. R., Iron(III) Chloride-Catalysed Aerobic Reduction of Olefins using Aqueous Hydrazine at Ambient Temperature. *Adv. Synth. Catal.* **2012**, *354*, 1437-1442.
25. Zhou, C.; Wang, Z., Cadmium-Mediated Carbonyl Benzoylation in Tap Water. *Synthesis* **2005**, *2005*, 1649-1655.
26. Surendra, K.; Krishnaveni, S. N.; Kumar, P. V.; Nageswar, V. D. Y.; Rao, R. K., Regioselective Ring Opening of Oxiranes to Halohydrins with Tetrabutylammonium Halide in Water in the Presence of Cyclodextrin. *Lett. Org. Chem.* **2005**, *2*, 652-658.
27. Mühlthau, F.; Stadler, D.; Goeppert, A.; Olah, G. A.; Prakash, G. K. S.; Bach, T., Chiral  $\alpha$ -Branched Benzylic Carbocations: Diastereoselective Intermolecular Reactions with Arene Nucleophiles and NMR Spectroscopic Studies. *J. Am. Chem. Soc.* **2006**, *128*, 9668-9675.
28. Pace, V.; Castoldi, L.; Alcántara, A. R.; Holzer, W., Robust eco-friendly protocol for the preparation of  $\gamma$ -hydroxy- $\alpha,\beta$ -acetylenic esters by sequential one-pot elimination-addition of 2-bromoacrylates to aldehydes promoted by LTMP in 2-MeTHF. *Green Chem.* **2012**, *14*, 1859-1863.
29. Shailaja, J.; Kaanumalle, L. S.; Sivasubramanian, K.; Natarajan, A.; Ponchot, K. J.; Pradhan, A.; Ramamurthy, V., Asymmetric induction during electron transfer mediated photoreduction of carbonyl compounds: role of zeolites. *Org. Biomol. Chem.* **2006**, *4*, 1561-1571.
30. Boit, T. B.; Mehta, M. M.; Kim, J.; Baker, E. L.; Garg, N. K., Reductive Arylation of Amides via a Nickel-Catalyzed Suzuki-Miyaura-Coupling and Transfer-Hydrogenation Cascade. *Angew. Chem. Int. Ed.* **2021**, *60*, 2472-2477.
31. Fallica, A. N.; Sorrenti, V.; D'Amico, A. G.; Salerno, L.; Romeo, G.; Intagliata, S.; Consoli, V.; Floresta, G.; Rescifina, A.; D'Agata, V.; Vanella, L.; Pittalà, V., Discovery of Novel Acetamide-Based Heme Oxygenase-1 Inhibitors with Potent In Vitro Antiproliferative Activity. *J. Med. Chem.* **2021**, *64*, 13373-13393.
32. B. J. Kim and D. S. Matteson, *Angew. Chem. Int. Ed.*, 2004, *43*, 3056-3058.
33. CrysAlisPro. Version 1.171.41. *Rigaku Oxford Diffraction*, **2021**.
34. Sheldrick, G. M. SHELXT - Integrated space-group and crystal-structure determination. *Acta Cryst. A* **2015**, *71*, 3-8.
35. Sheldrick, G. M. Crystal structure refinement with SHELXL. *Acta Cryst. C* **2015**, *71*, 3-8.
36. Dolomanov O.V.; Bourhis L.J.; Gildea R.J.; Howard J.A.K.; Puschmann H. OLEX2: a complete structure solution, refinement and analysis program. *J. Appl. Cryst.* **2009**, *42*, 229-341.
37. Gaussian 16, Revision C.01, M. J. Frisch, G. W. Trucks, H. B. Schlegel, G. E. Scuseria, M. A. Robb, J. R. Cheeseman, G. Scalmani, V. Barone, G. A. Petersson, H. Nakatsuji, X. Li, M. Caricato, A. V. Marenich, J. Bloino, B. G. Janesko, R. Gomperts, B. Mennucci, H. P. Hratchian, J. V. Ortiz, A. F. Izmaylov, J. L. Sonnenberg, D. Williams-Young, F. Ding, F. Lipparini, F. Egidi, J. Goings, B. Peng, A. Petrone, T. Henderson, D. Ranasinghe, V. G. Zakrzewski, J. Gao, N. Rega, G. Zheng, W. Liang, M. Hada, M. Ehara, K. Toyota, R. Fukuda, J. Hasegawa, M. Ishida, T. Nakajima, Y. Honda, O. Kitao, H. Nakai, T. Vreven, K. Throssell, J. A. Montgomery, Jr., J. E. Peralta, F. Ogliaro, M. J. Bearpark, J. J. Heyd, E. N. Brothers, K. N. Kudin, V. N. Staroverov, T. A. Keith, R. Kobayashi, J. Normand, K. Raghavachari, A. P. Rendell, J. C. Burant, S. S. Iyengar, J. Tomasi, M. Cossi, J. M. Millam, M. Klene, C. Adamo, R. Cammi, J. W. Ochterski, R. L. Martin, K. Morokuma, O. Farkas, J. B. Foresman, and D. J. Fox, Gaussian, Inc., Wallingford CT, 2019.

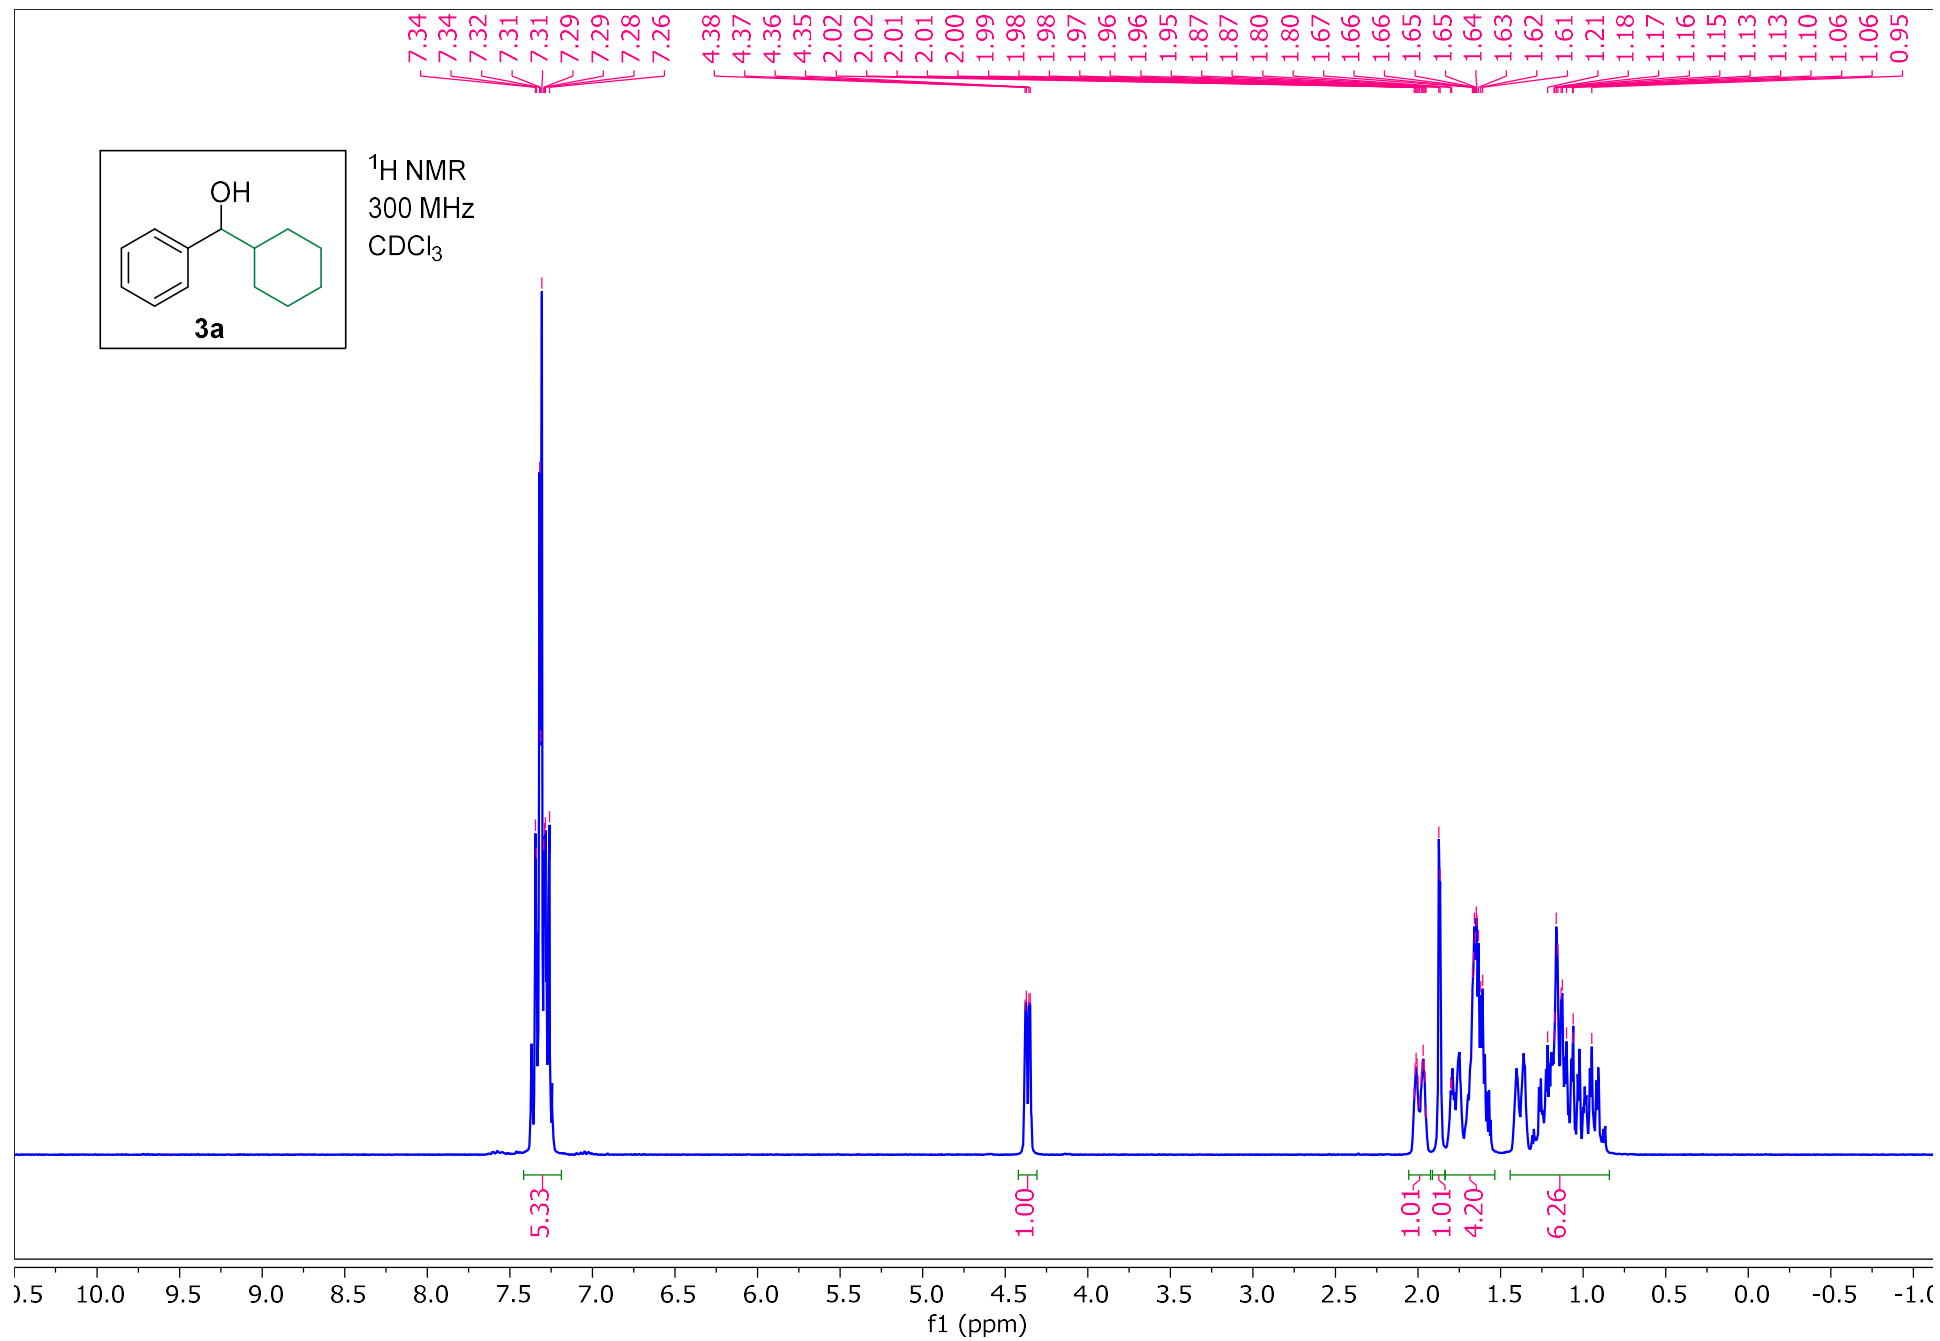



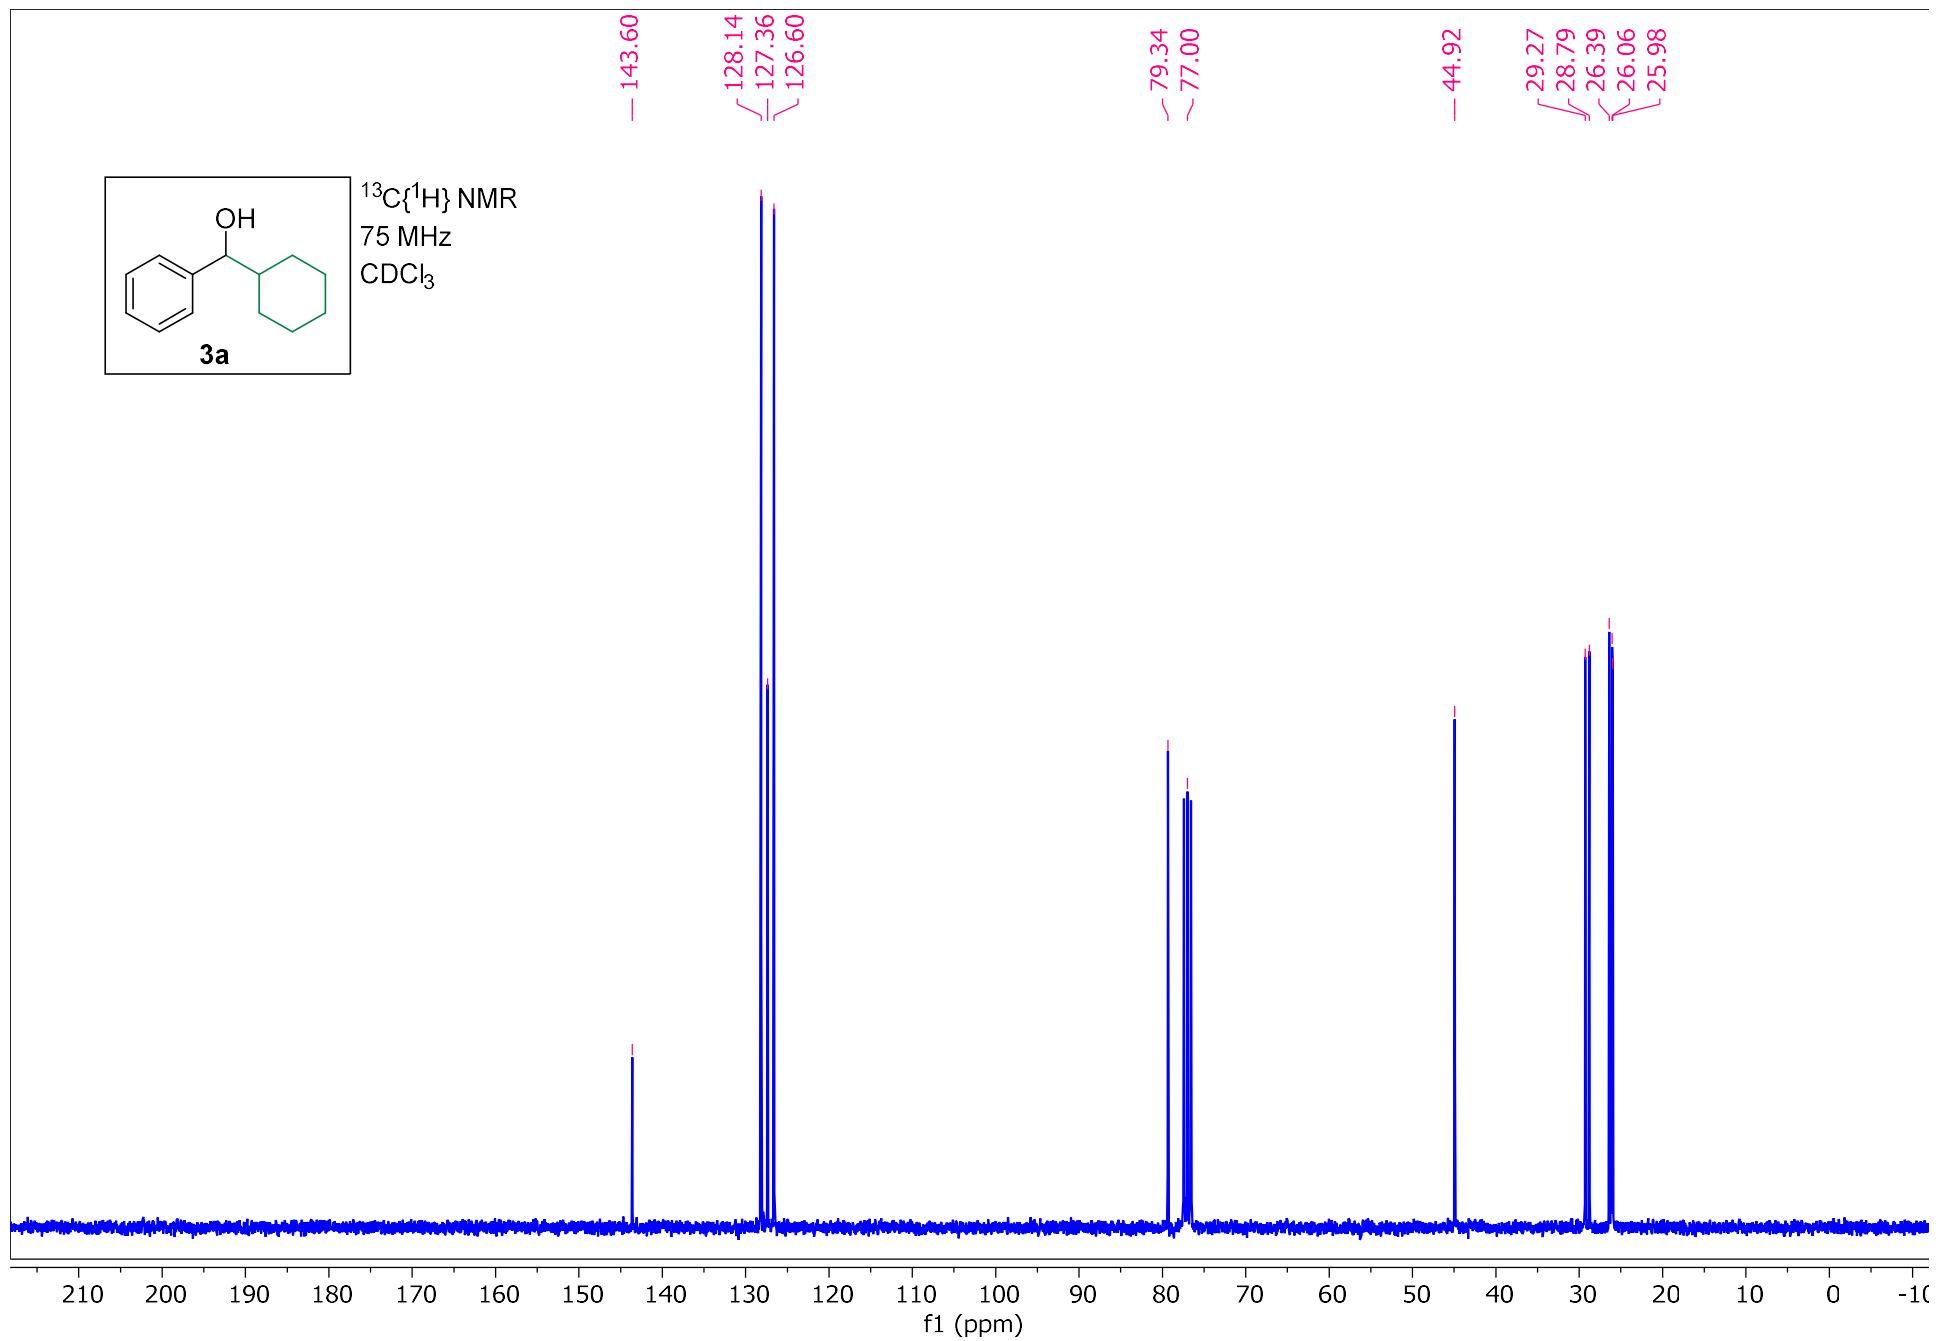

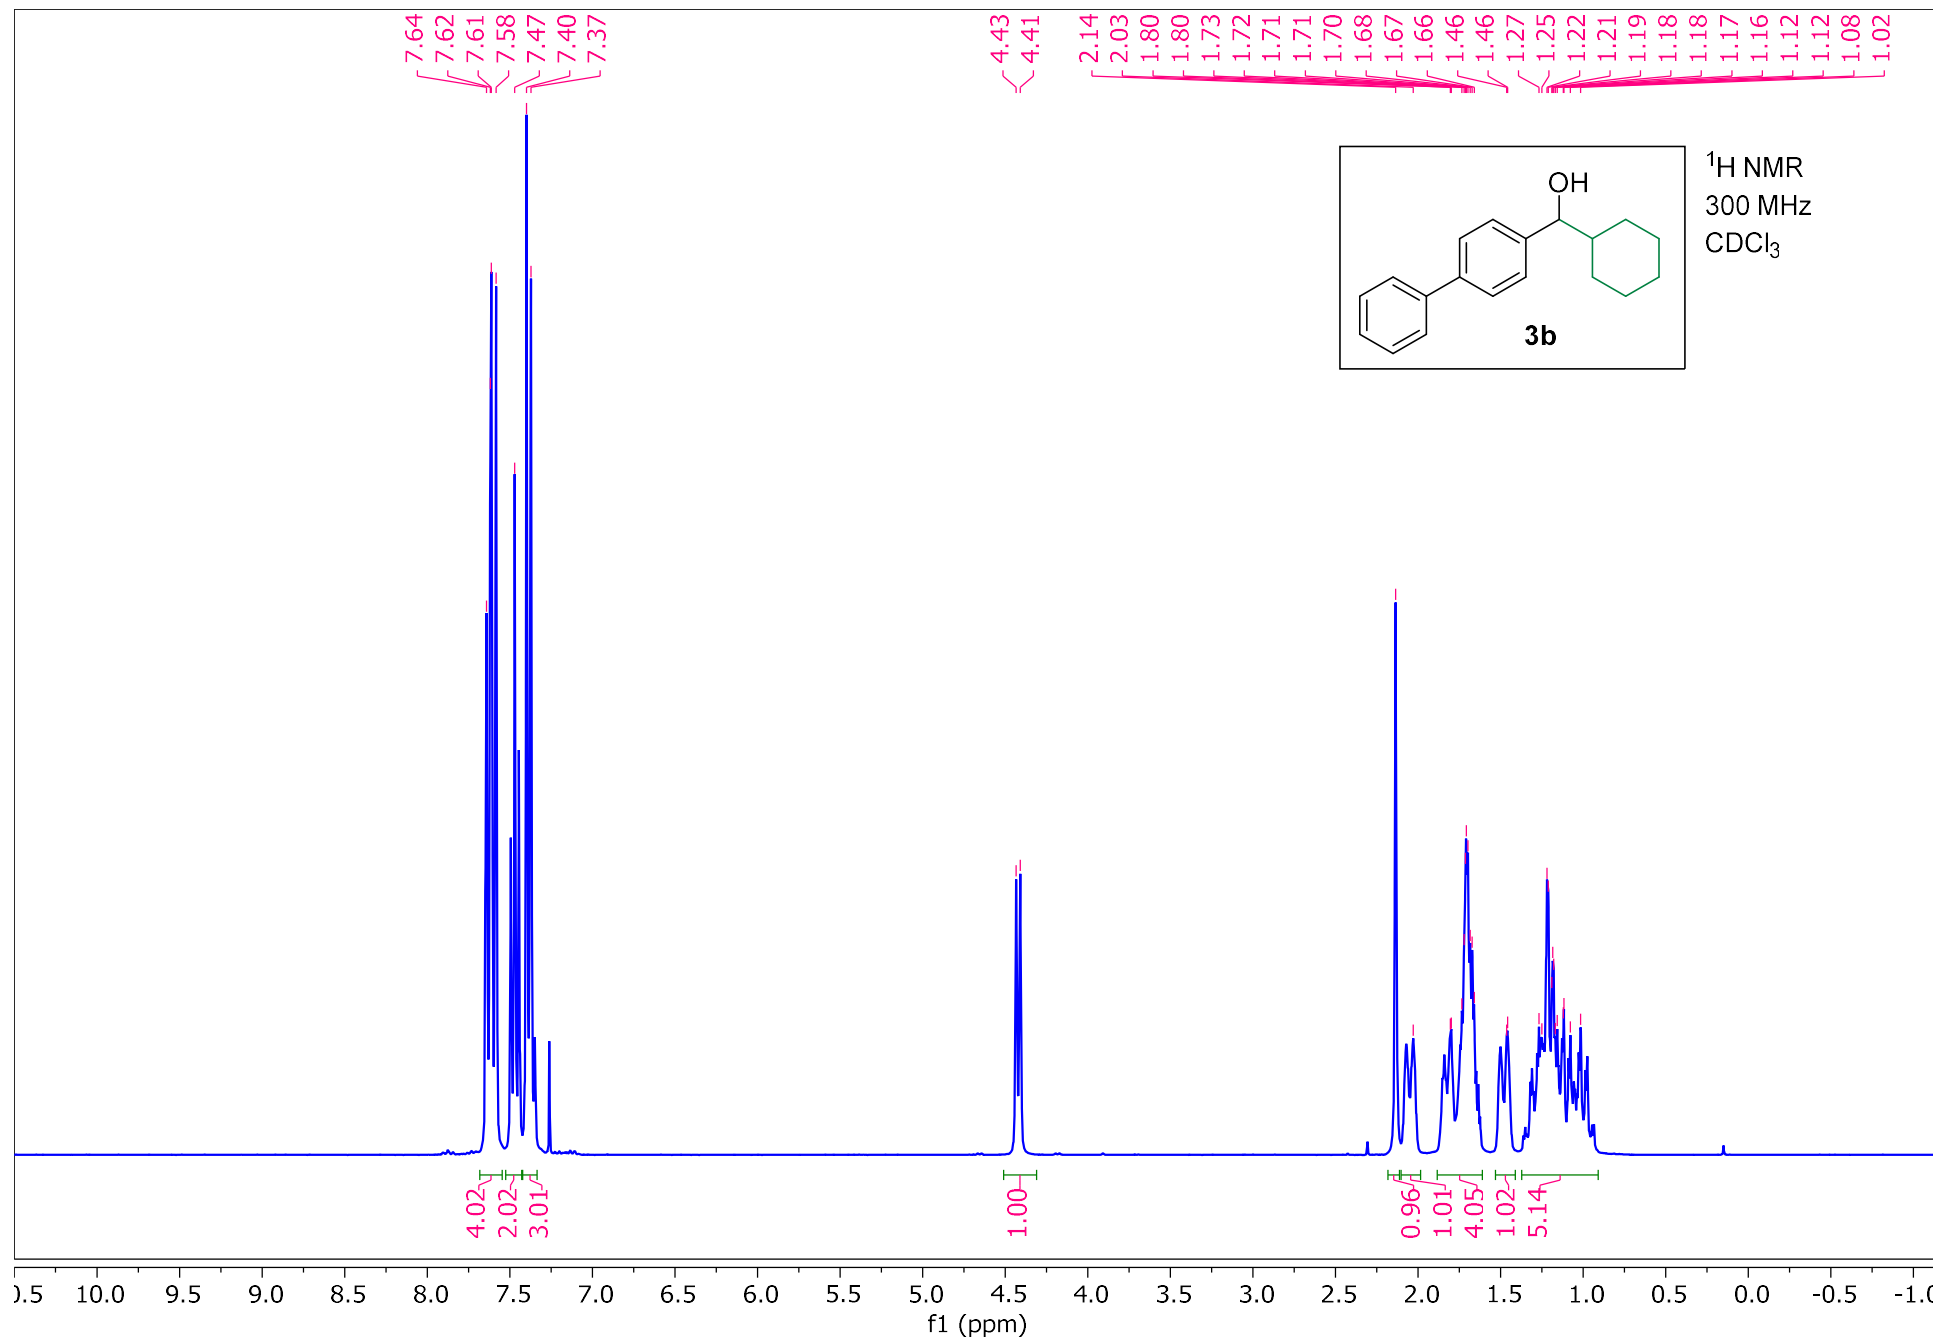

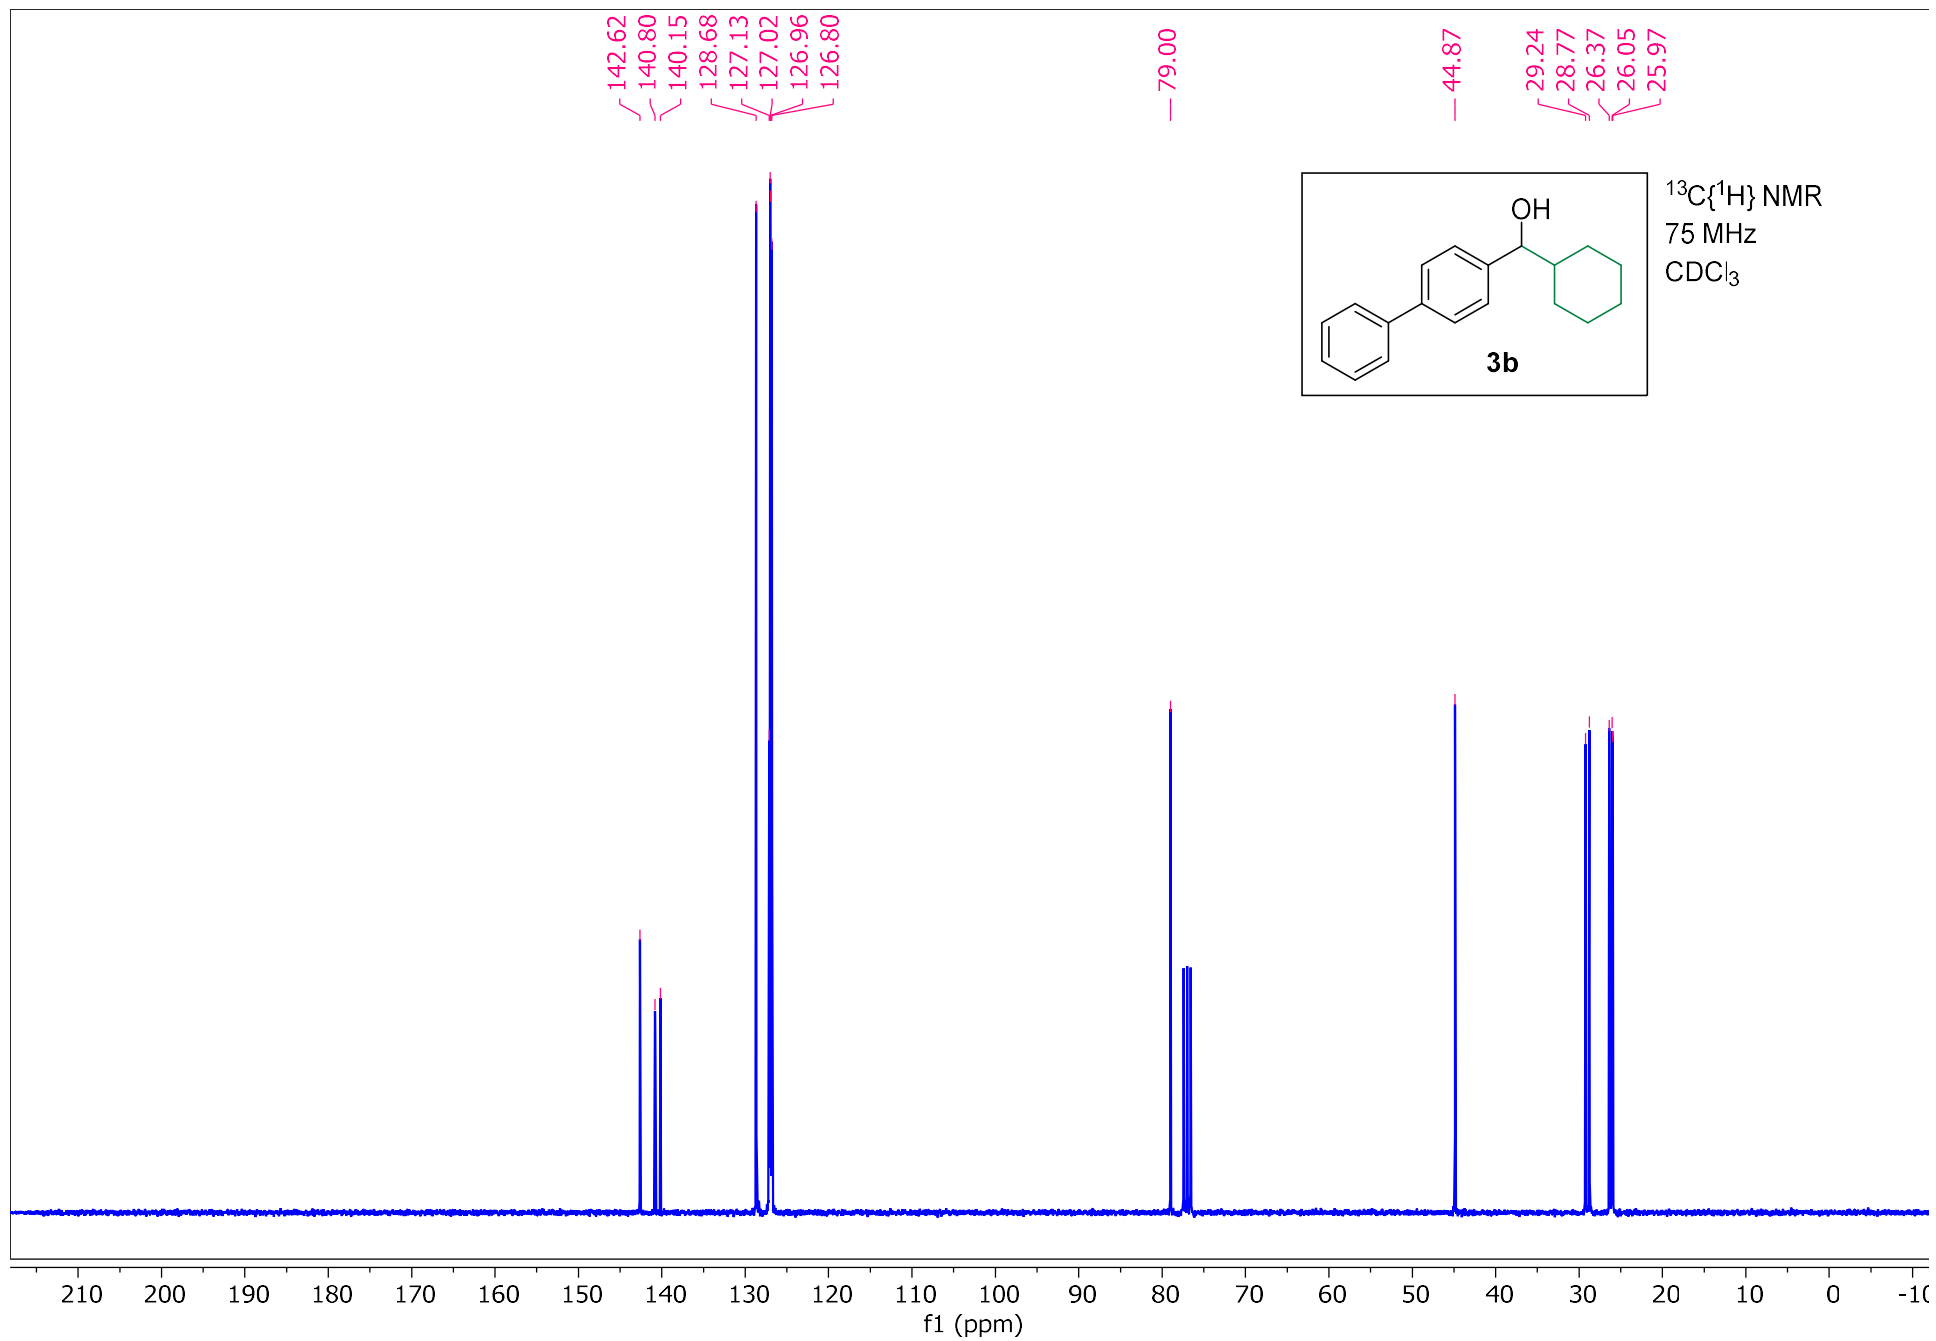

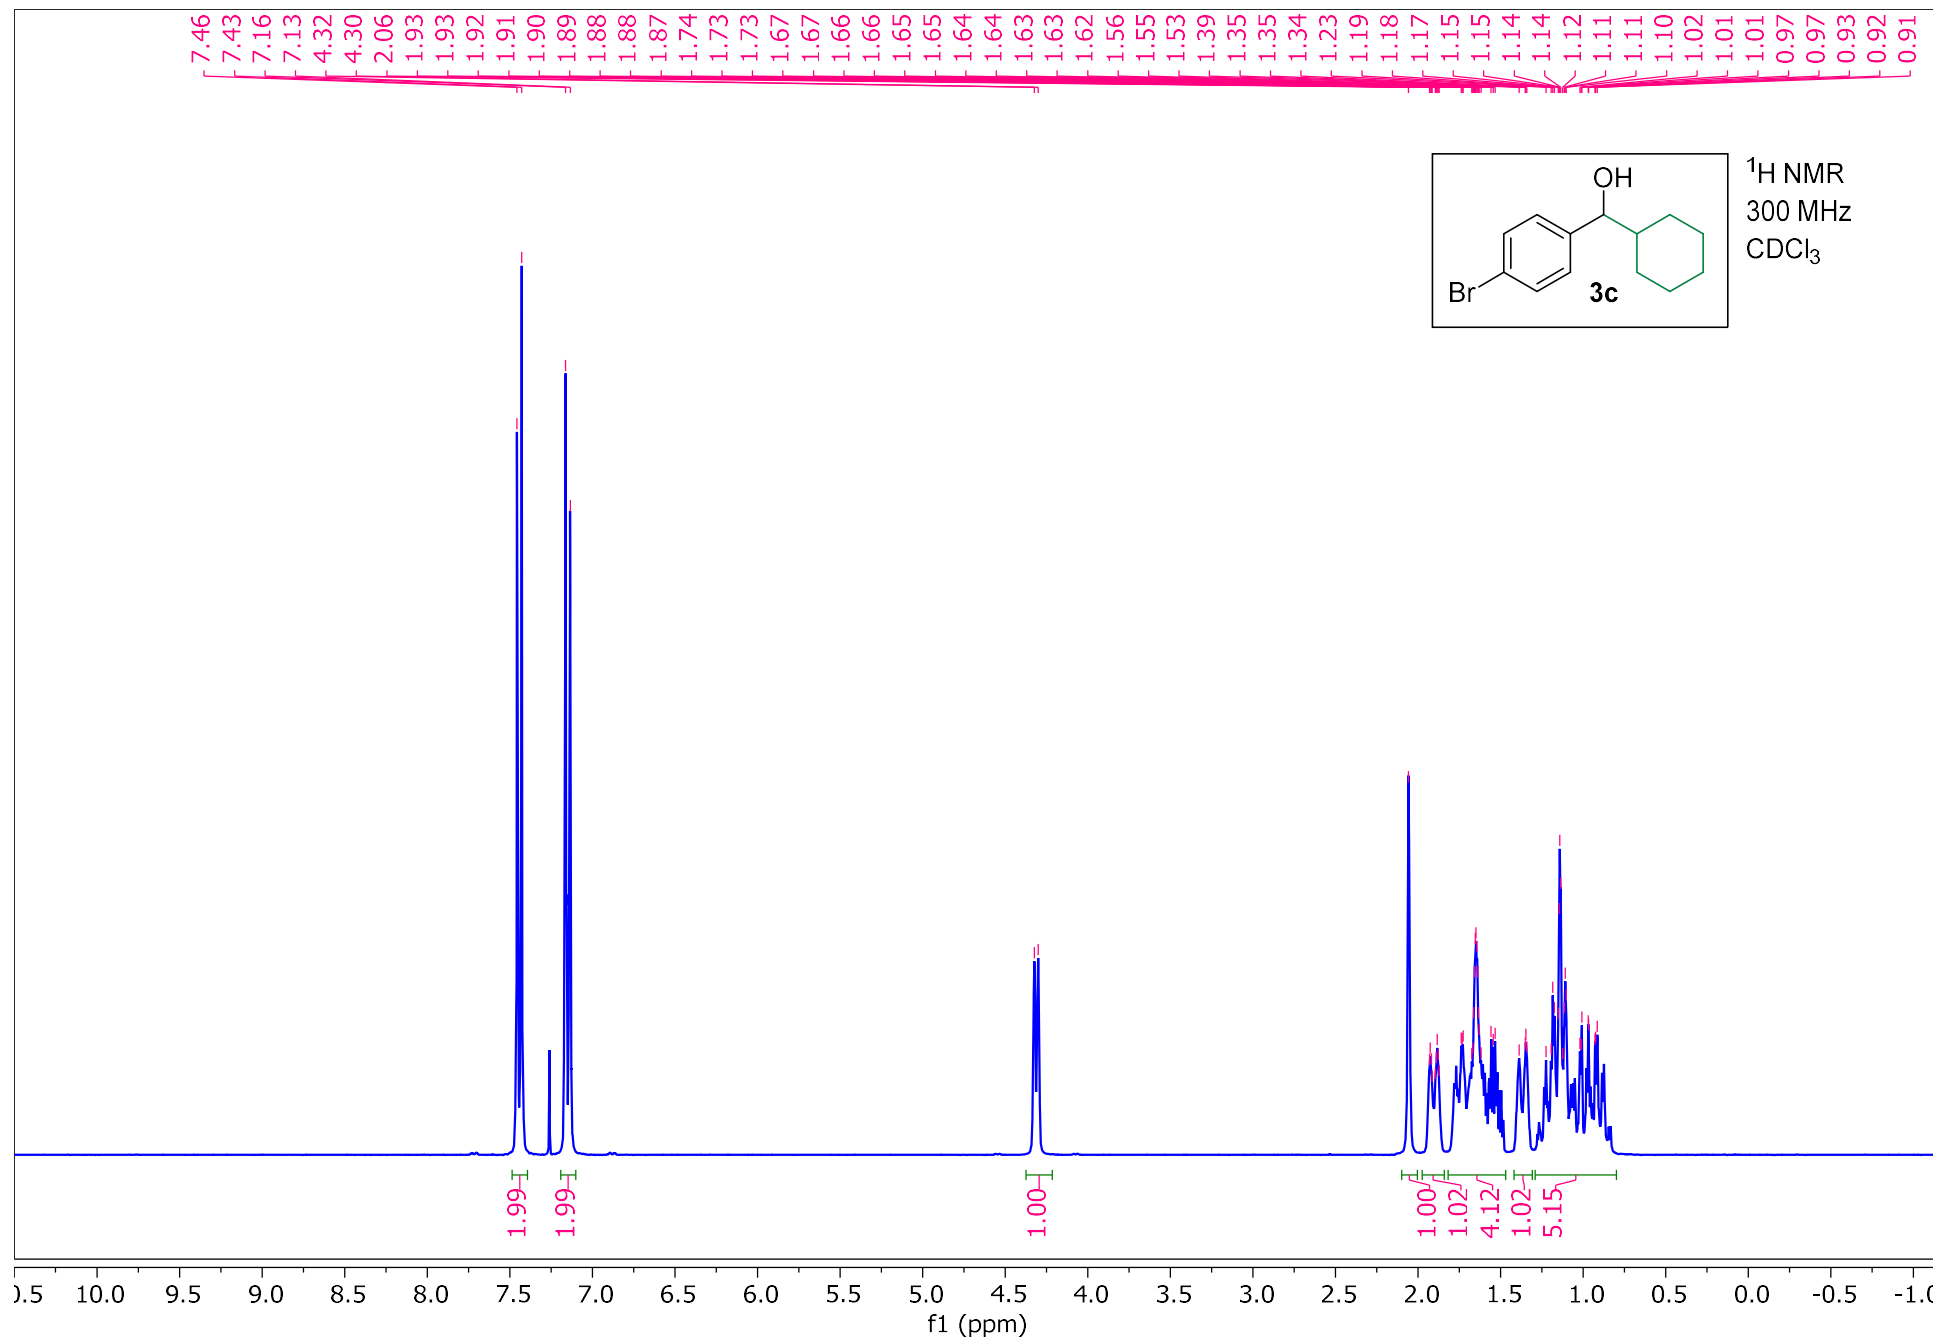

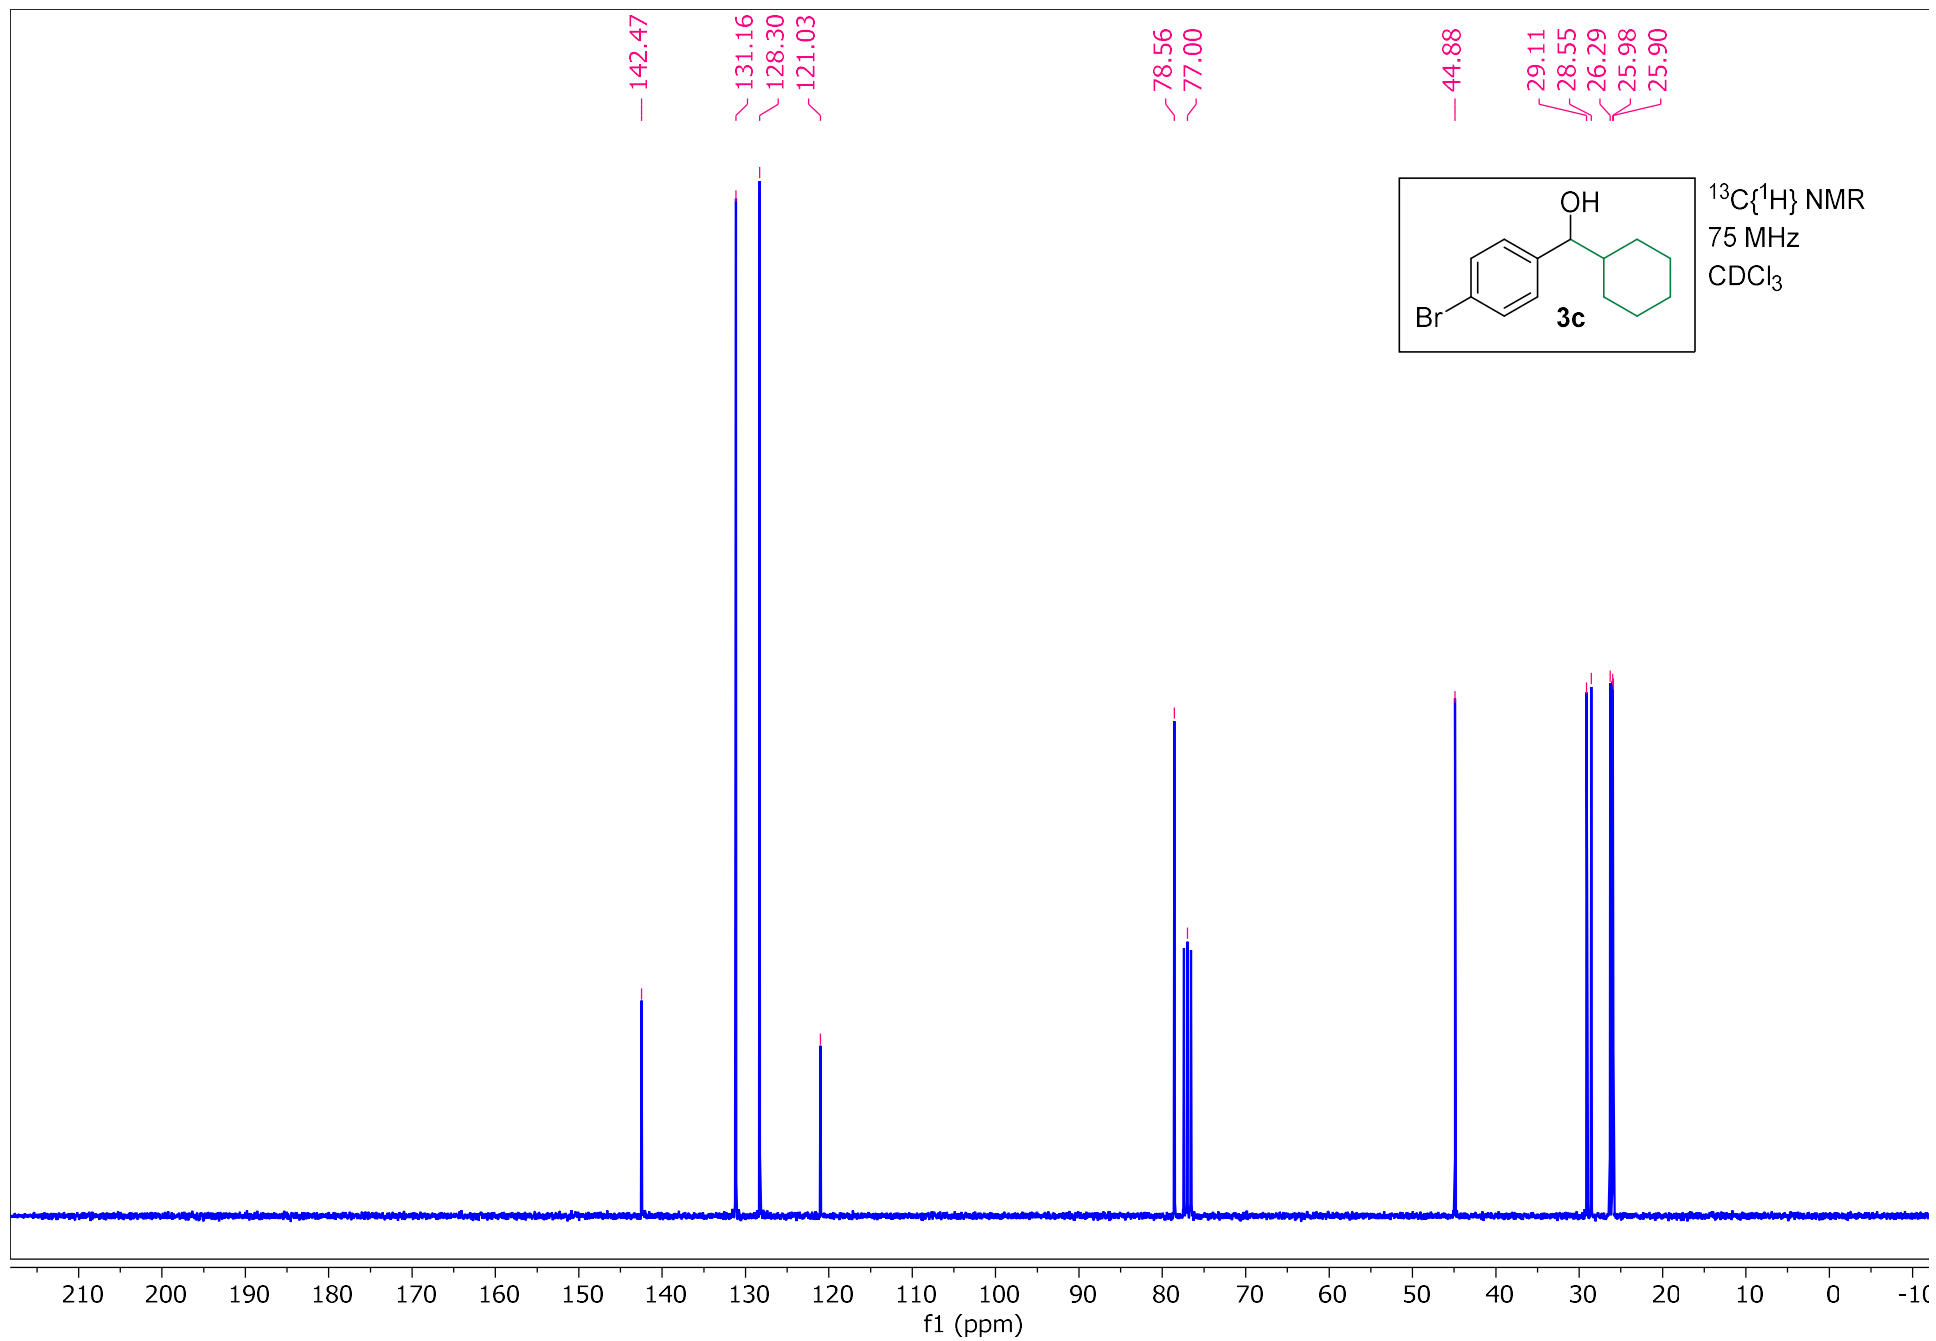

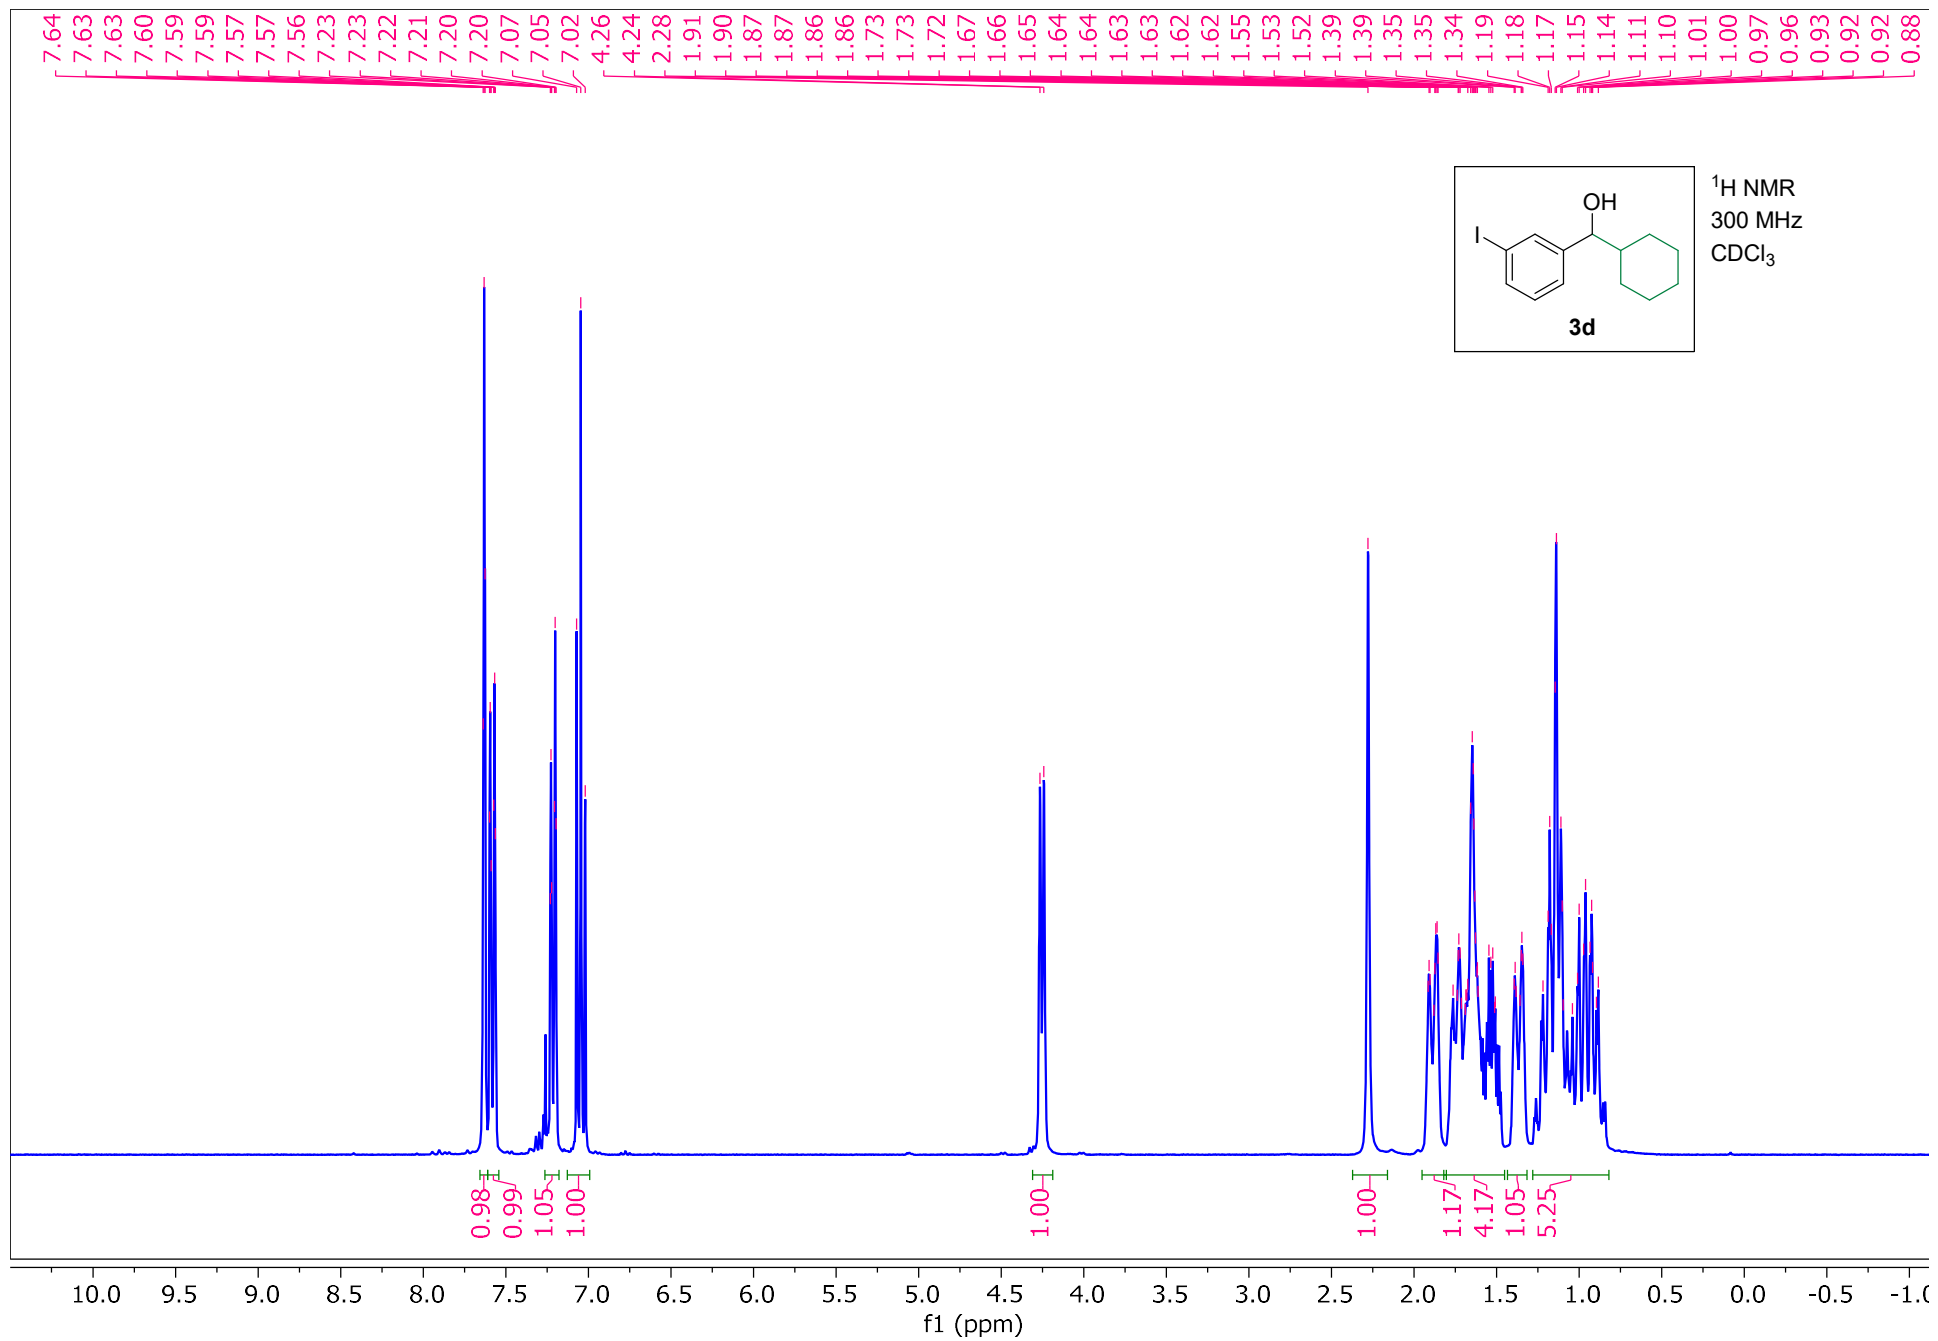

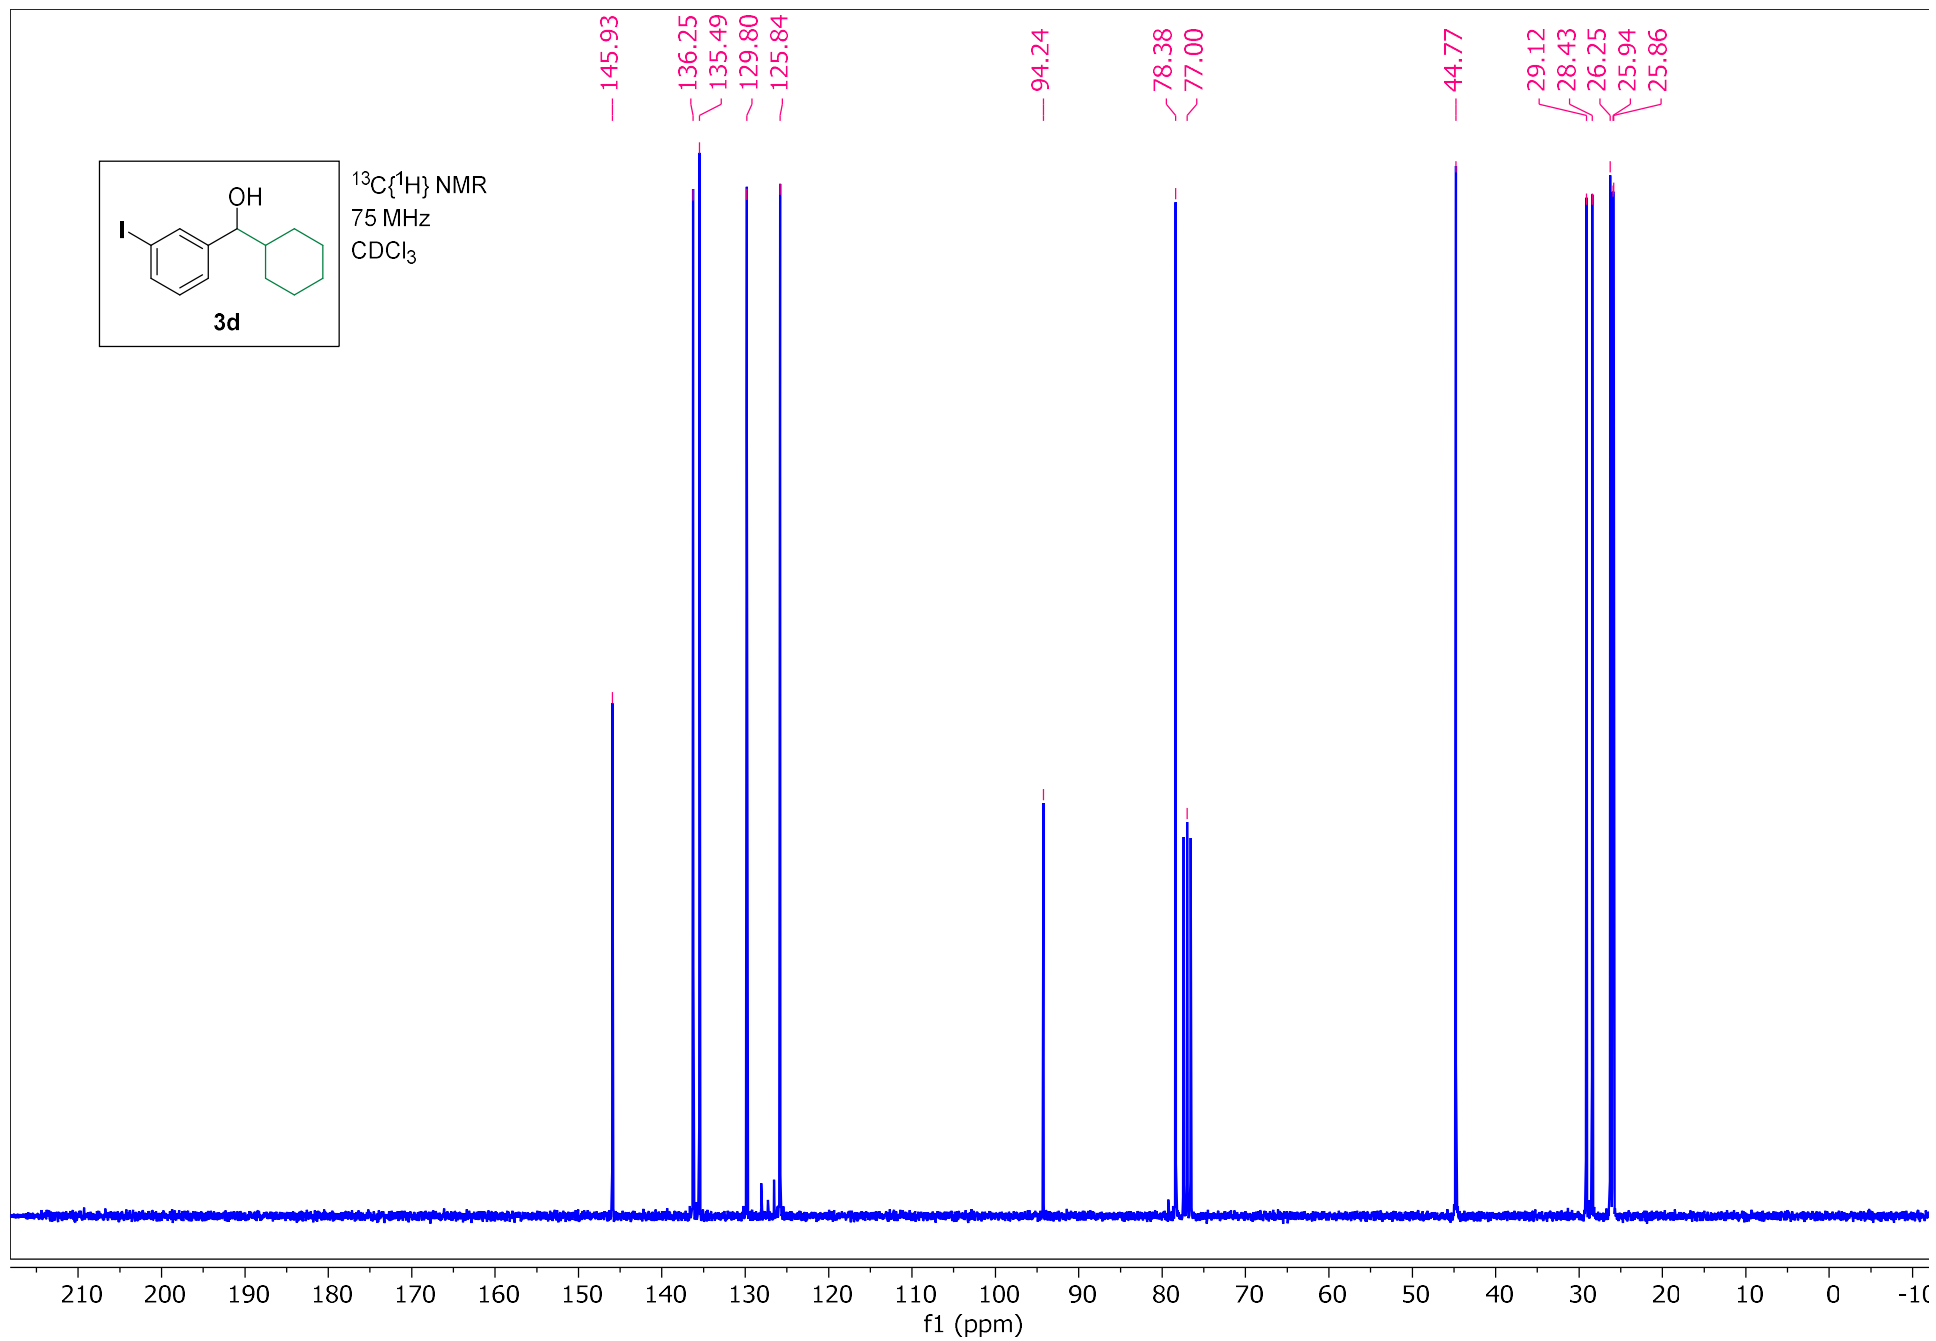

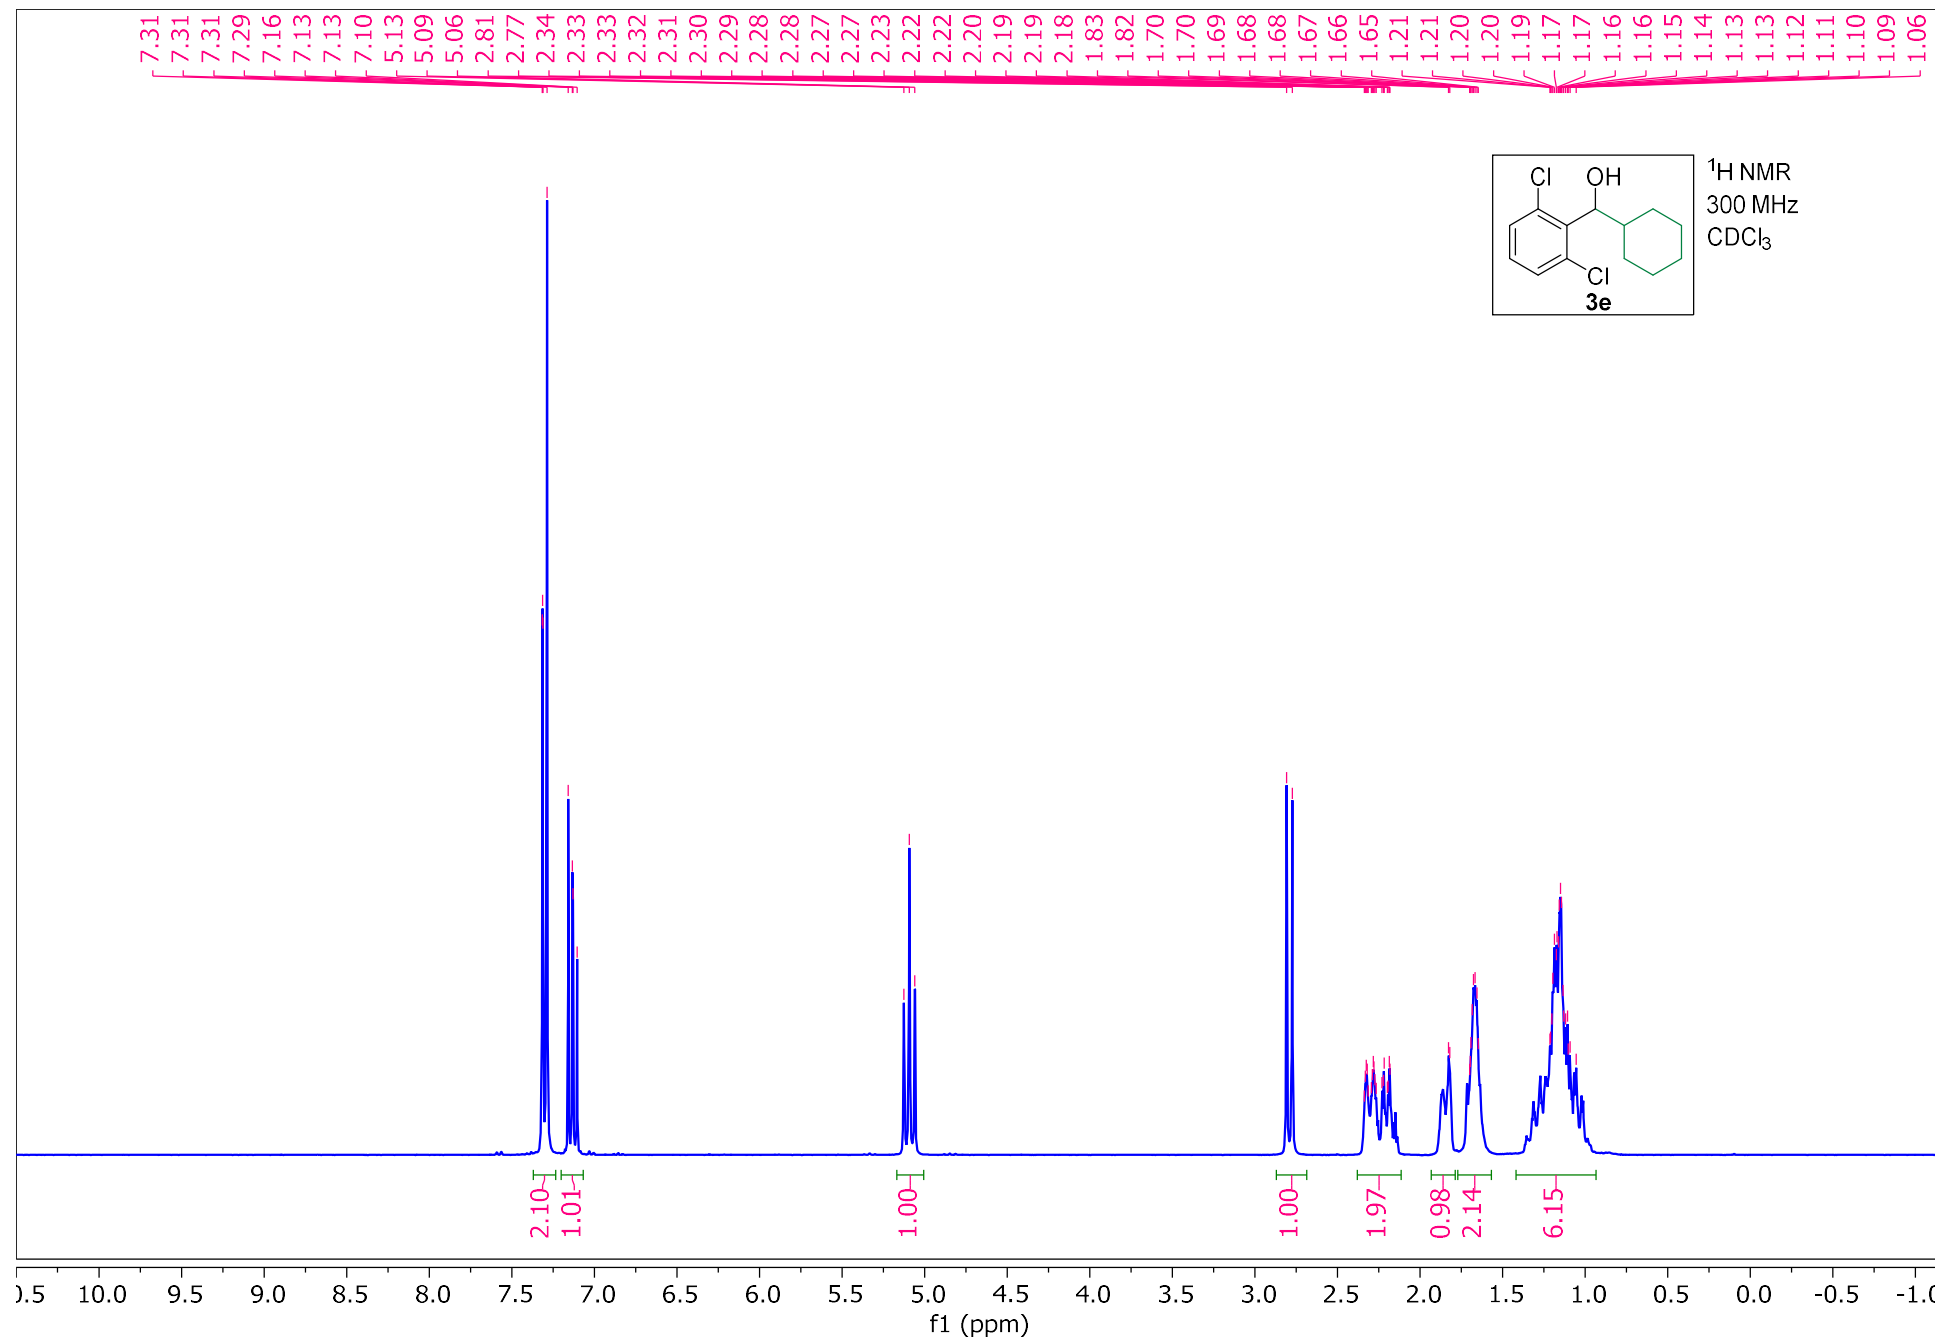



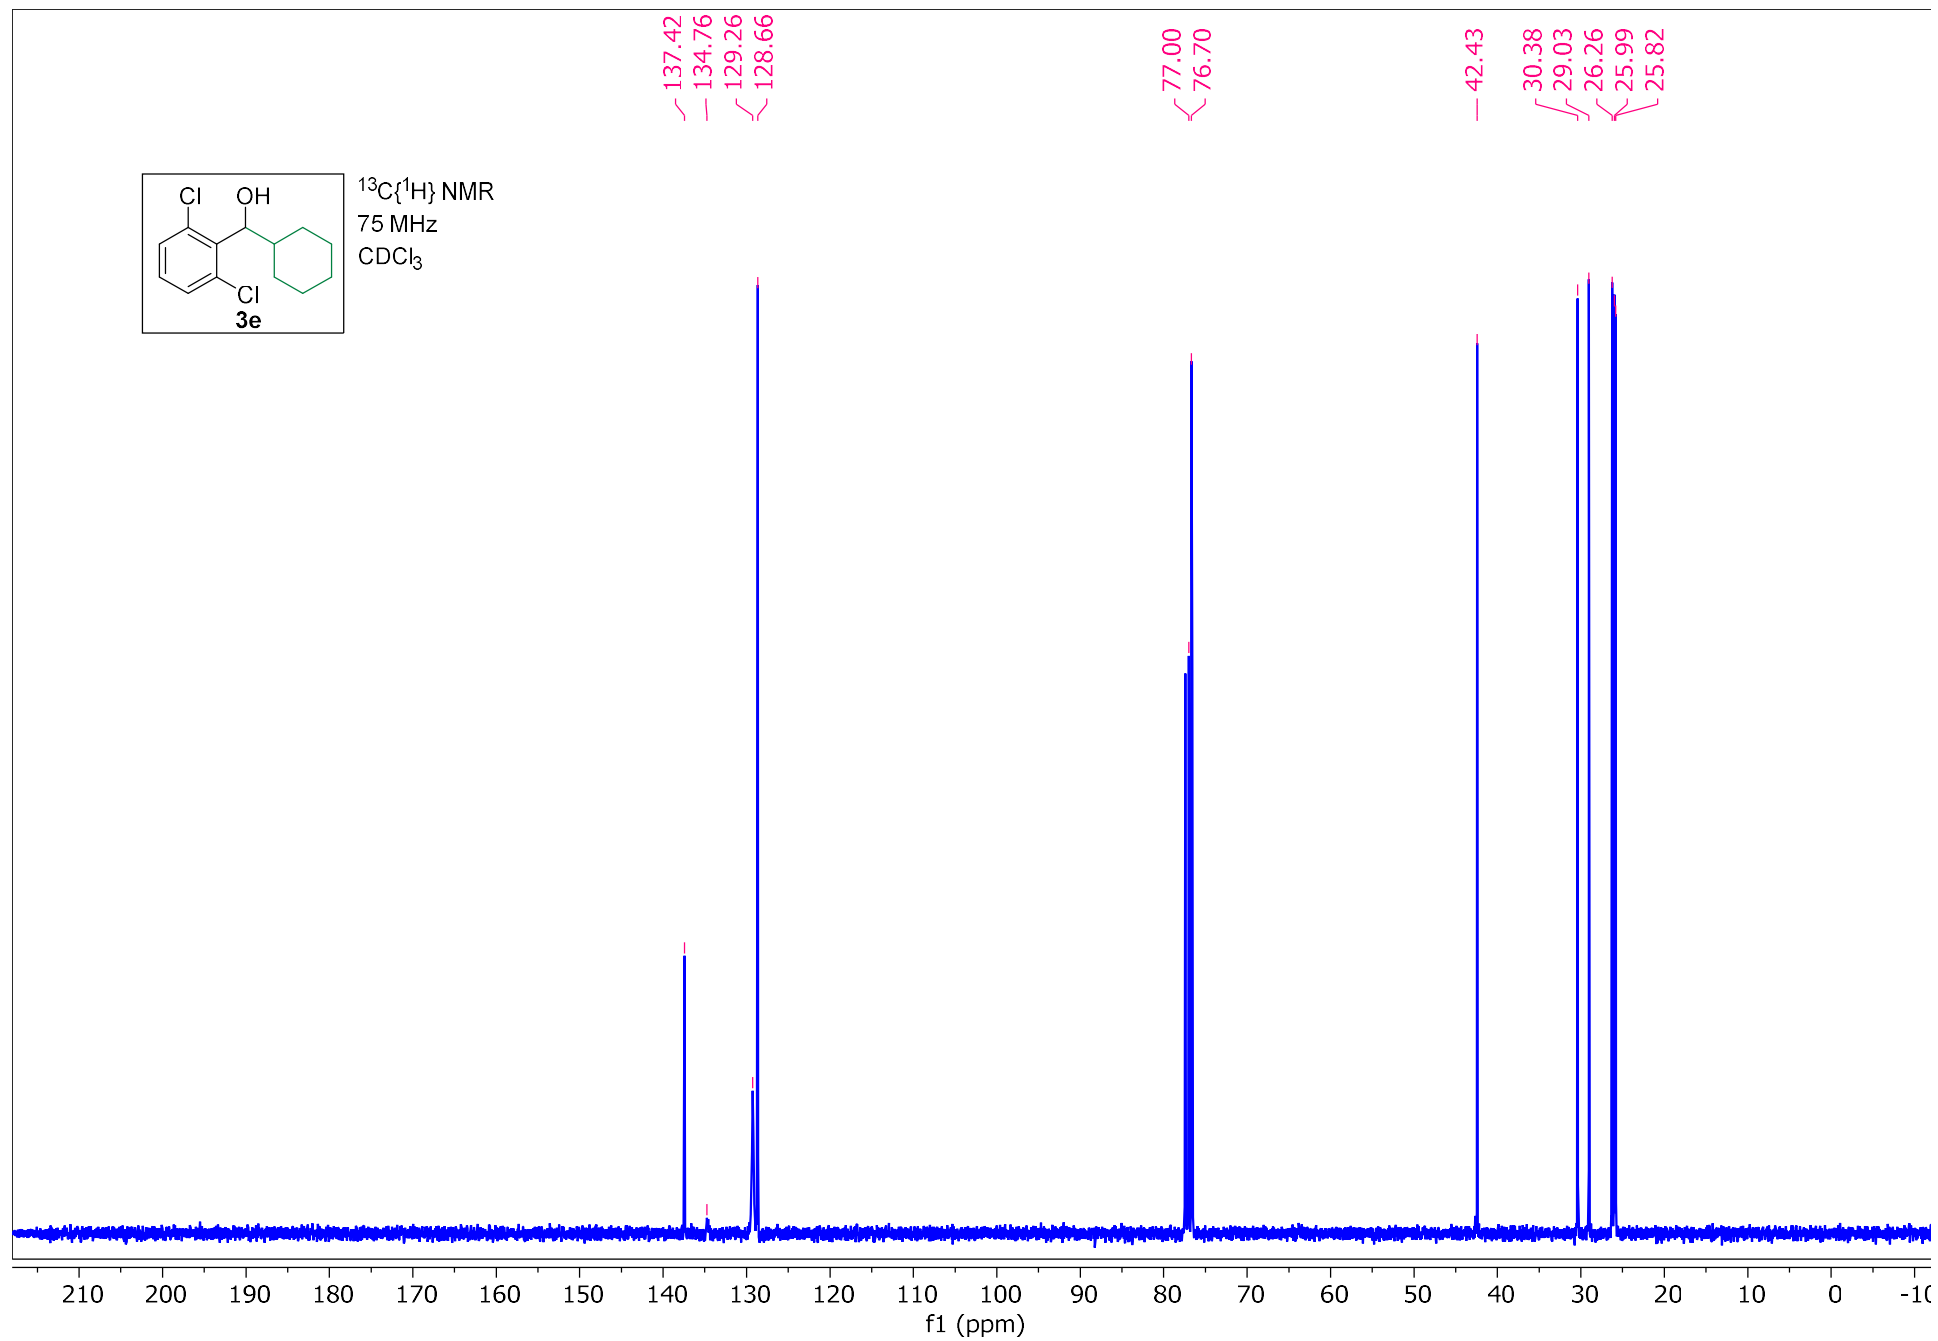

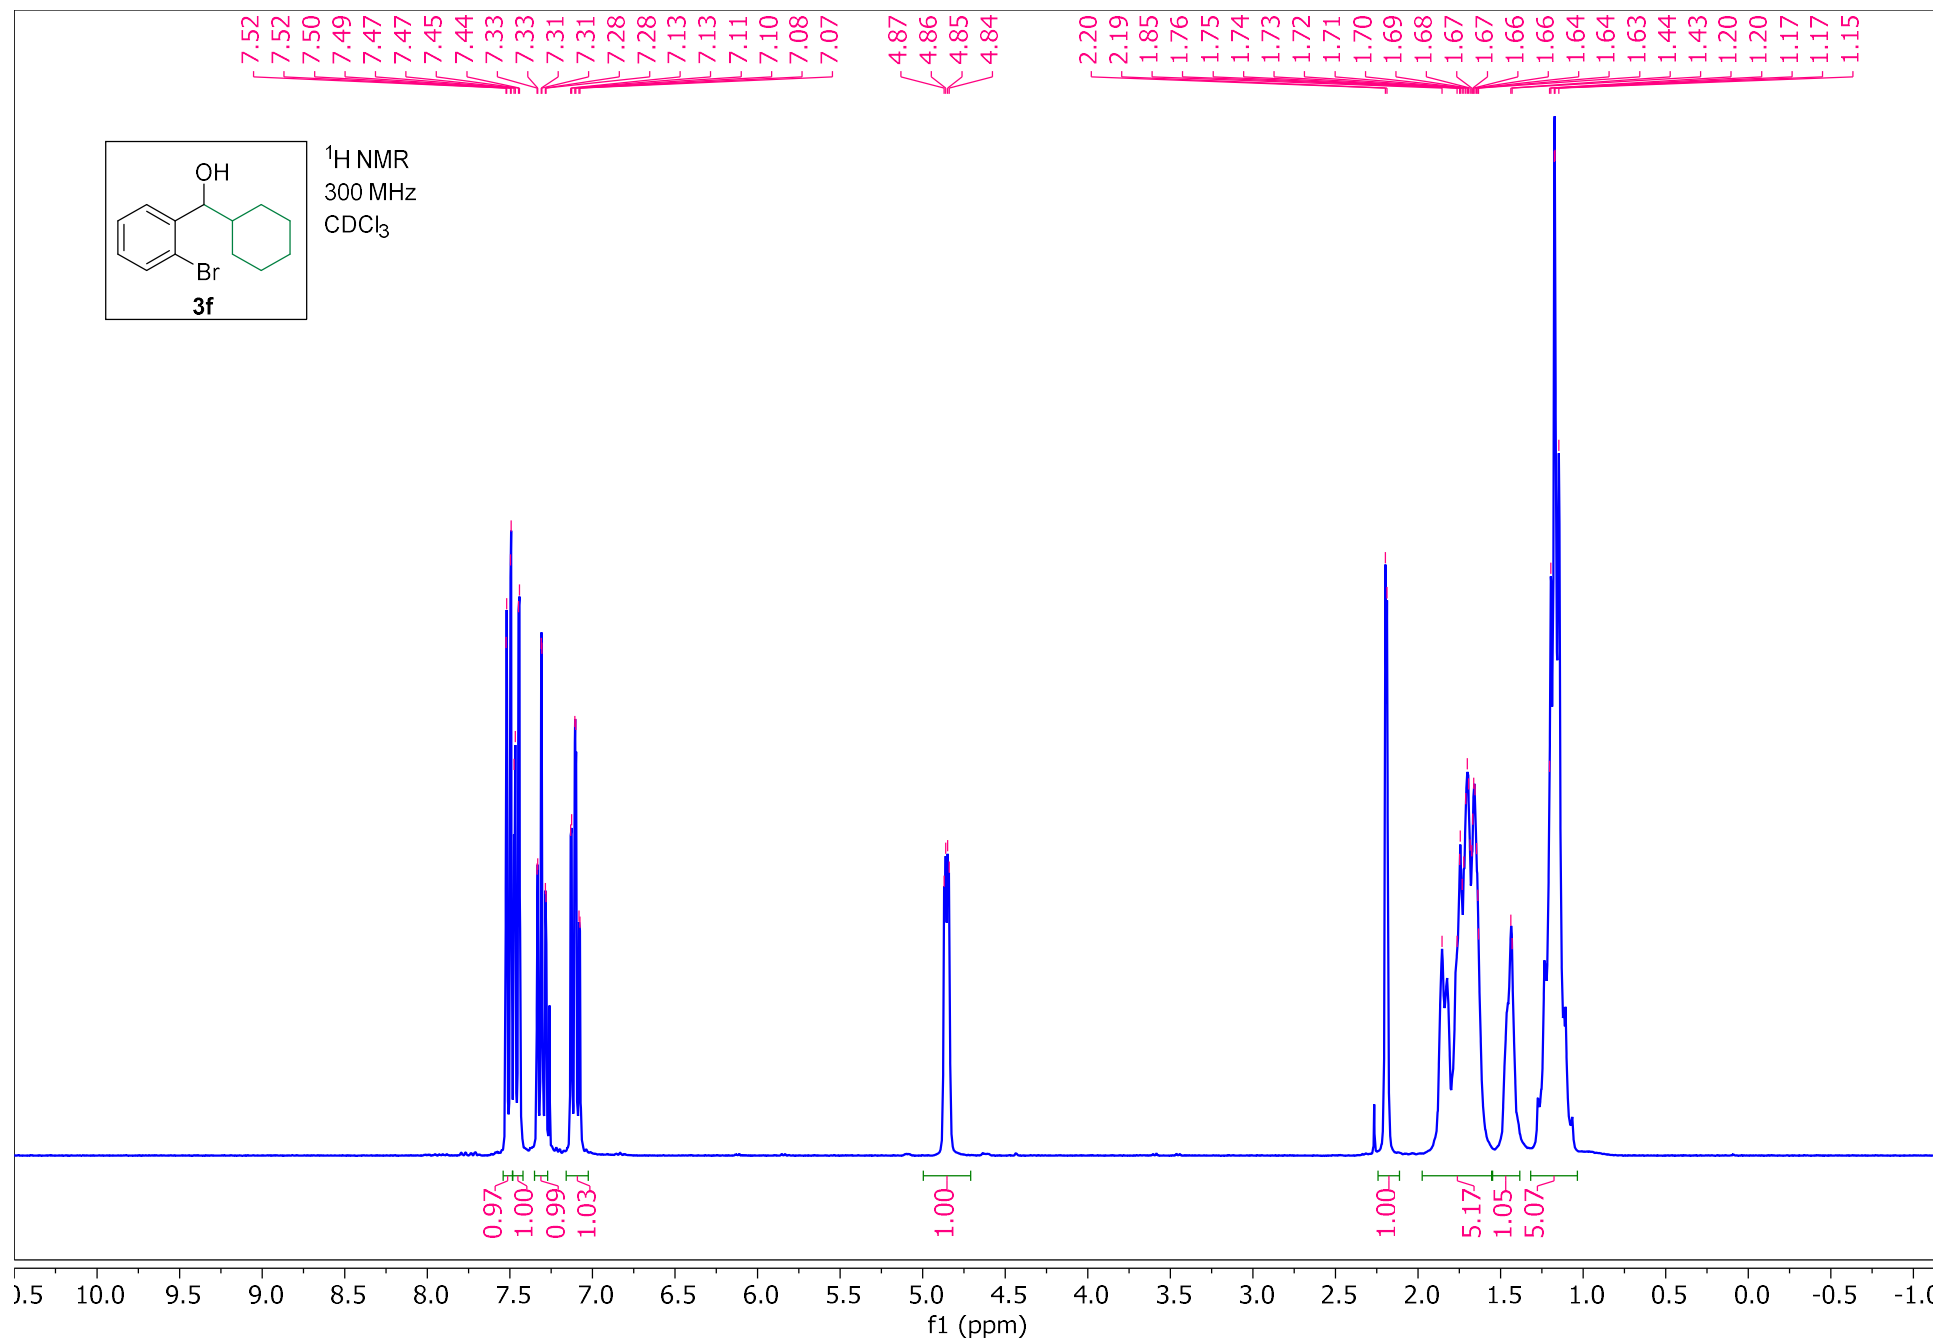

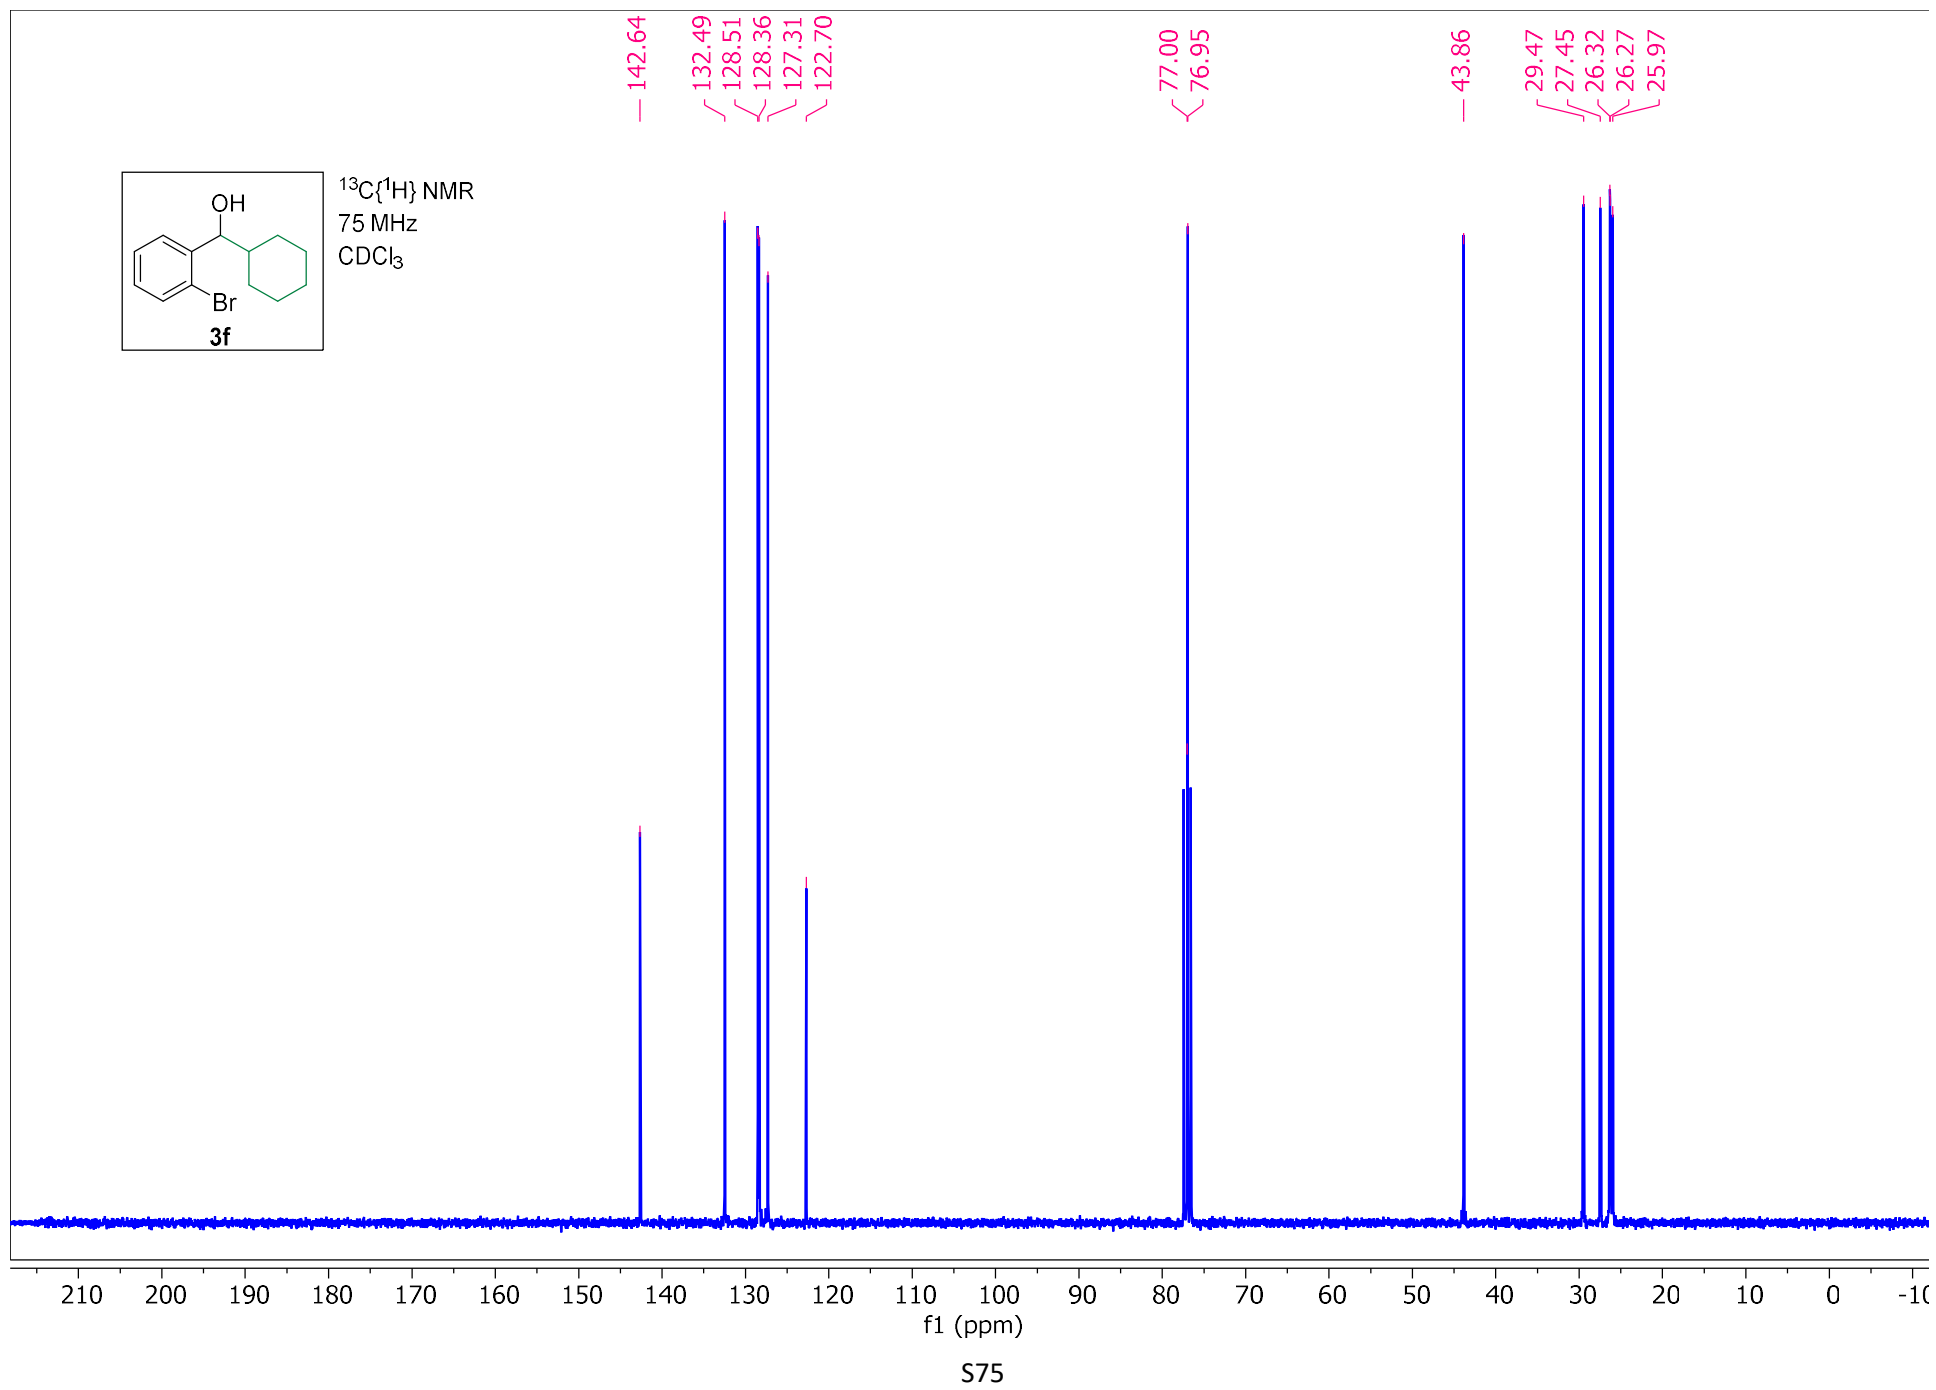

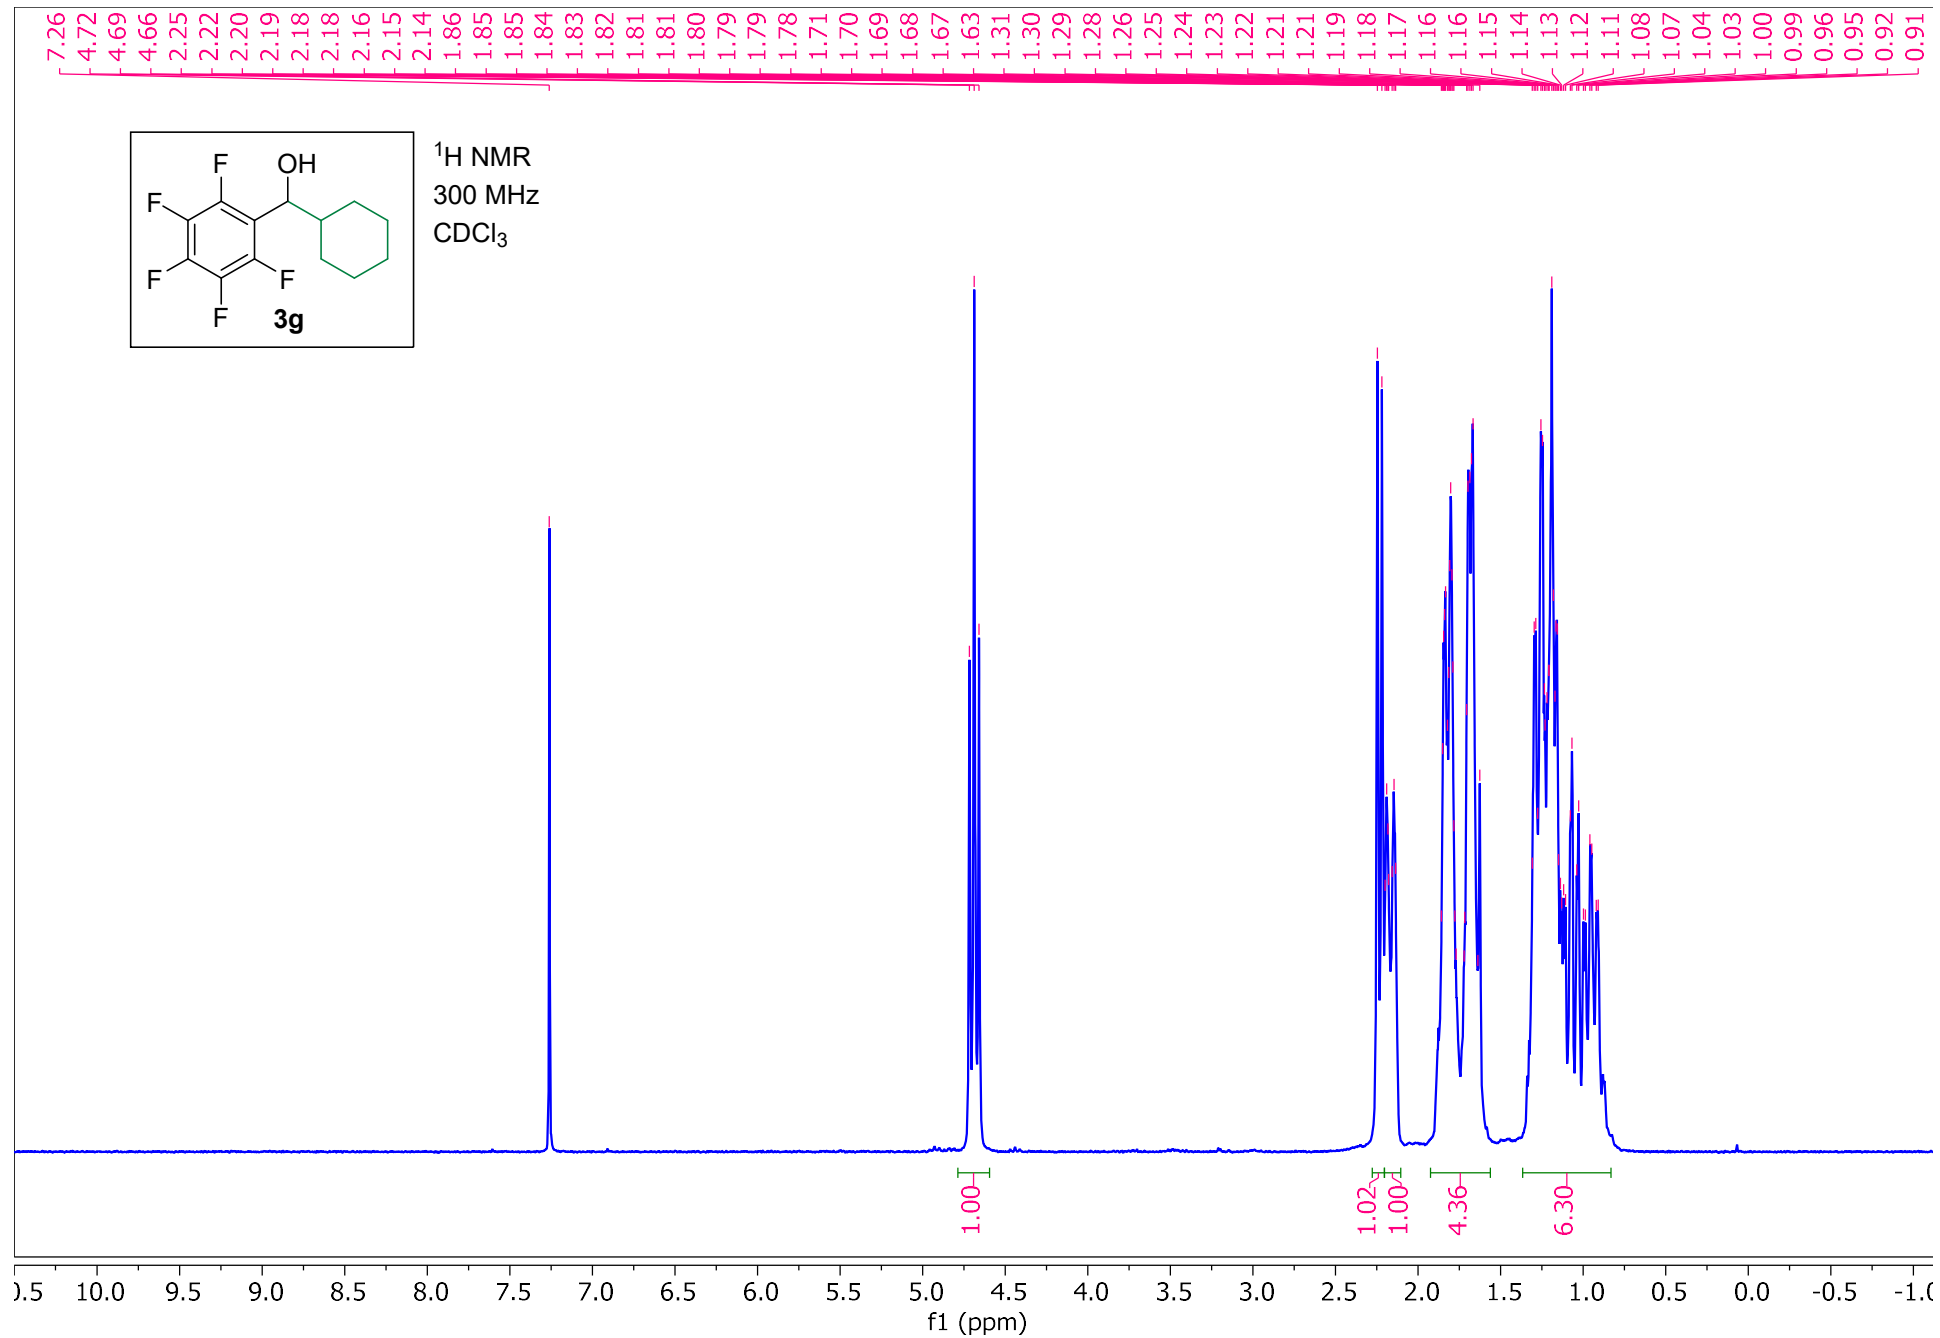

S76

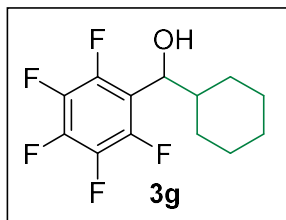

$^{13}\text{C}\{^1\text{H}\}$  NMR  
75 MHz  
 $\text{CDCl}_3$

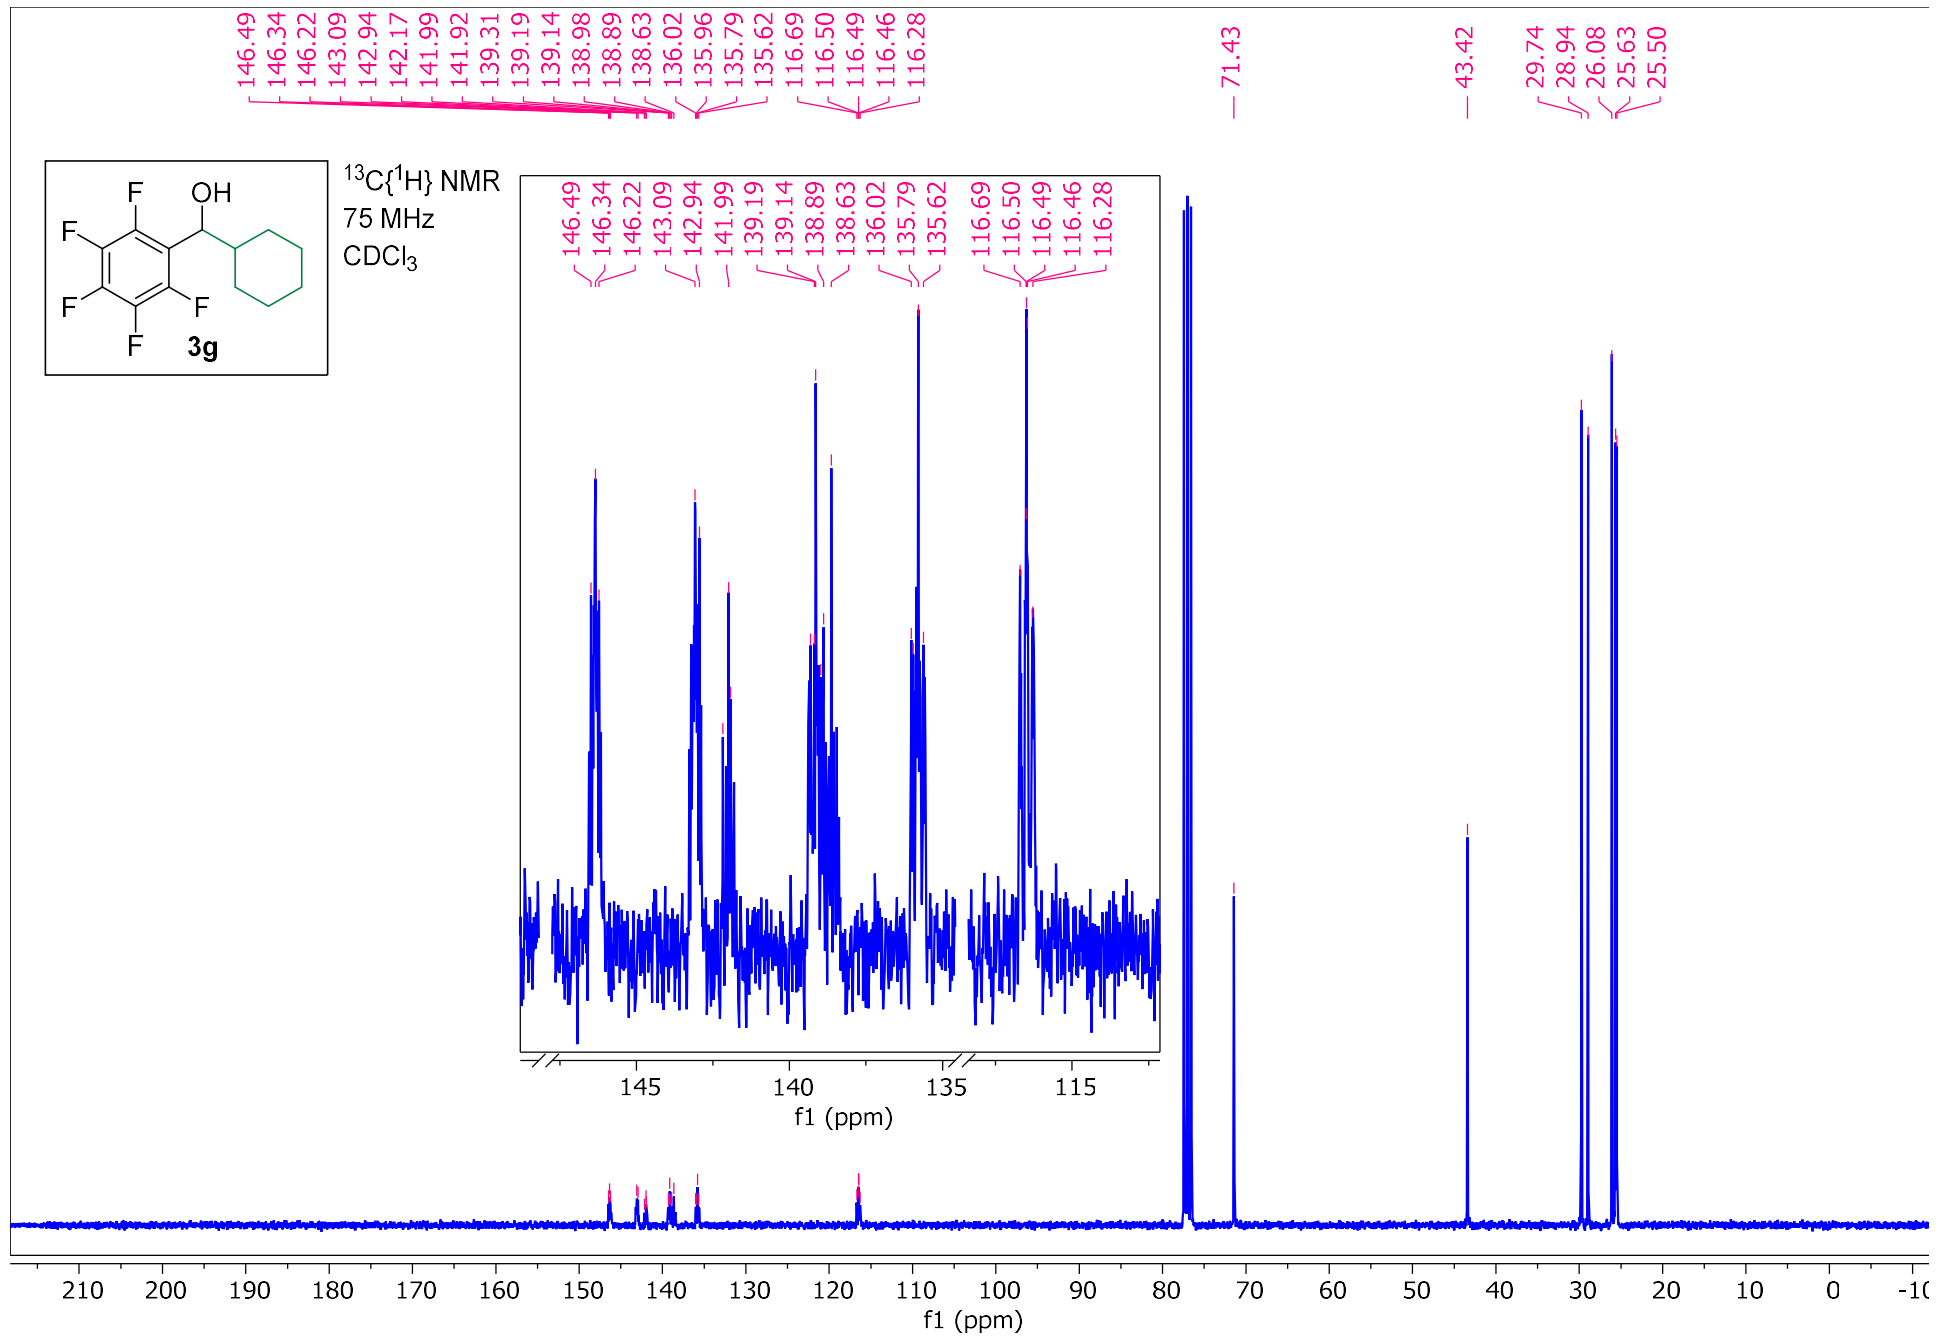

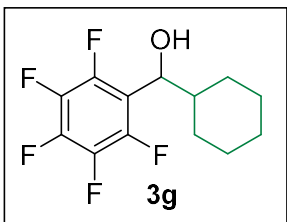

<sup>19</sup>F NMR  
271 MHz  
CDCl<sub>3</sub>

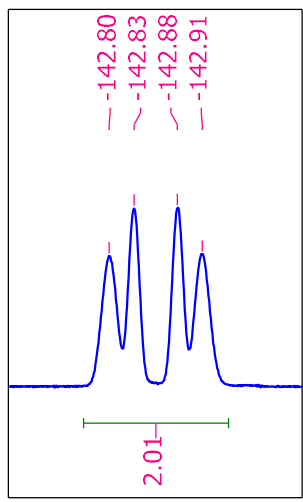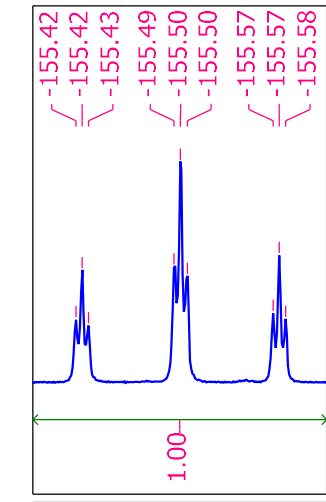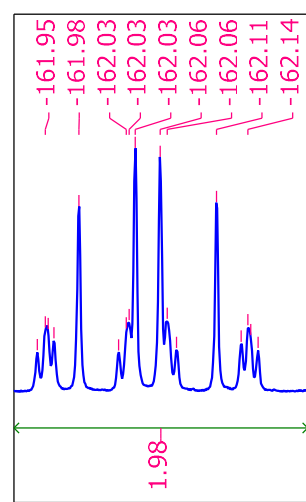

Chemical shift values (ppm): -142.80, -142.83, -142.88, -142.91, -155.42, -155.42, -155.49, -155.50, -155.50, -155.57, -155.57, -155.58, -161.95, -161.95, -161.98, -162.03, -162.03, -162.03, -162.06, -162.06, -162.11, -162.14

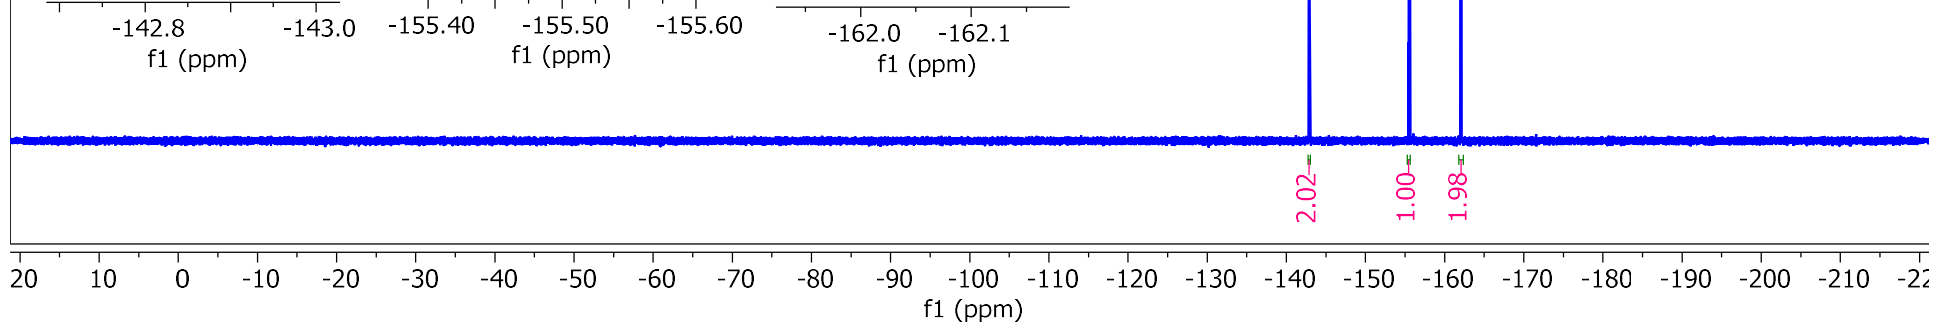

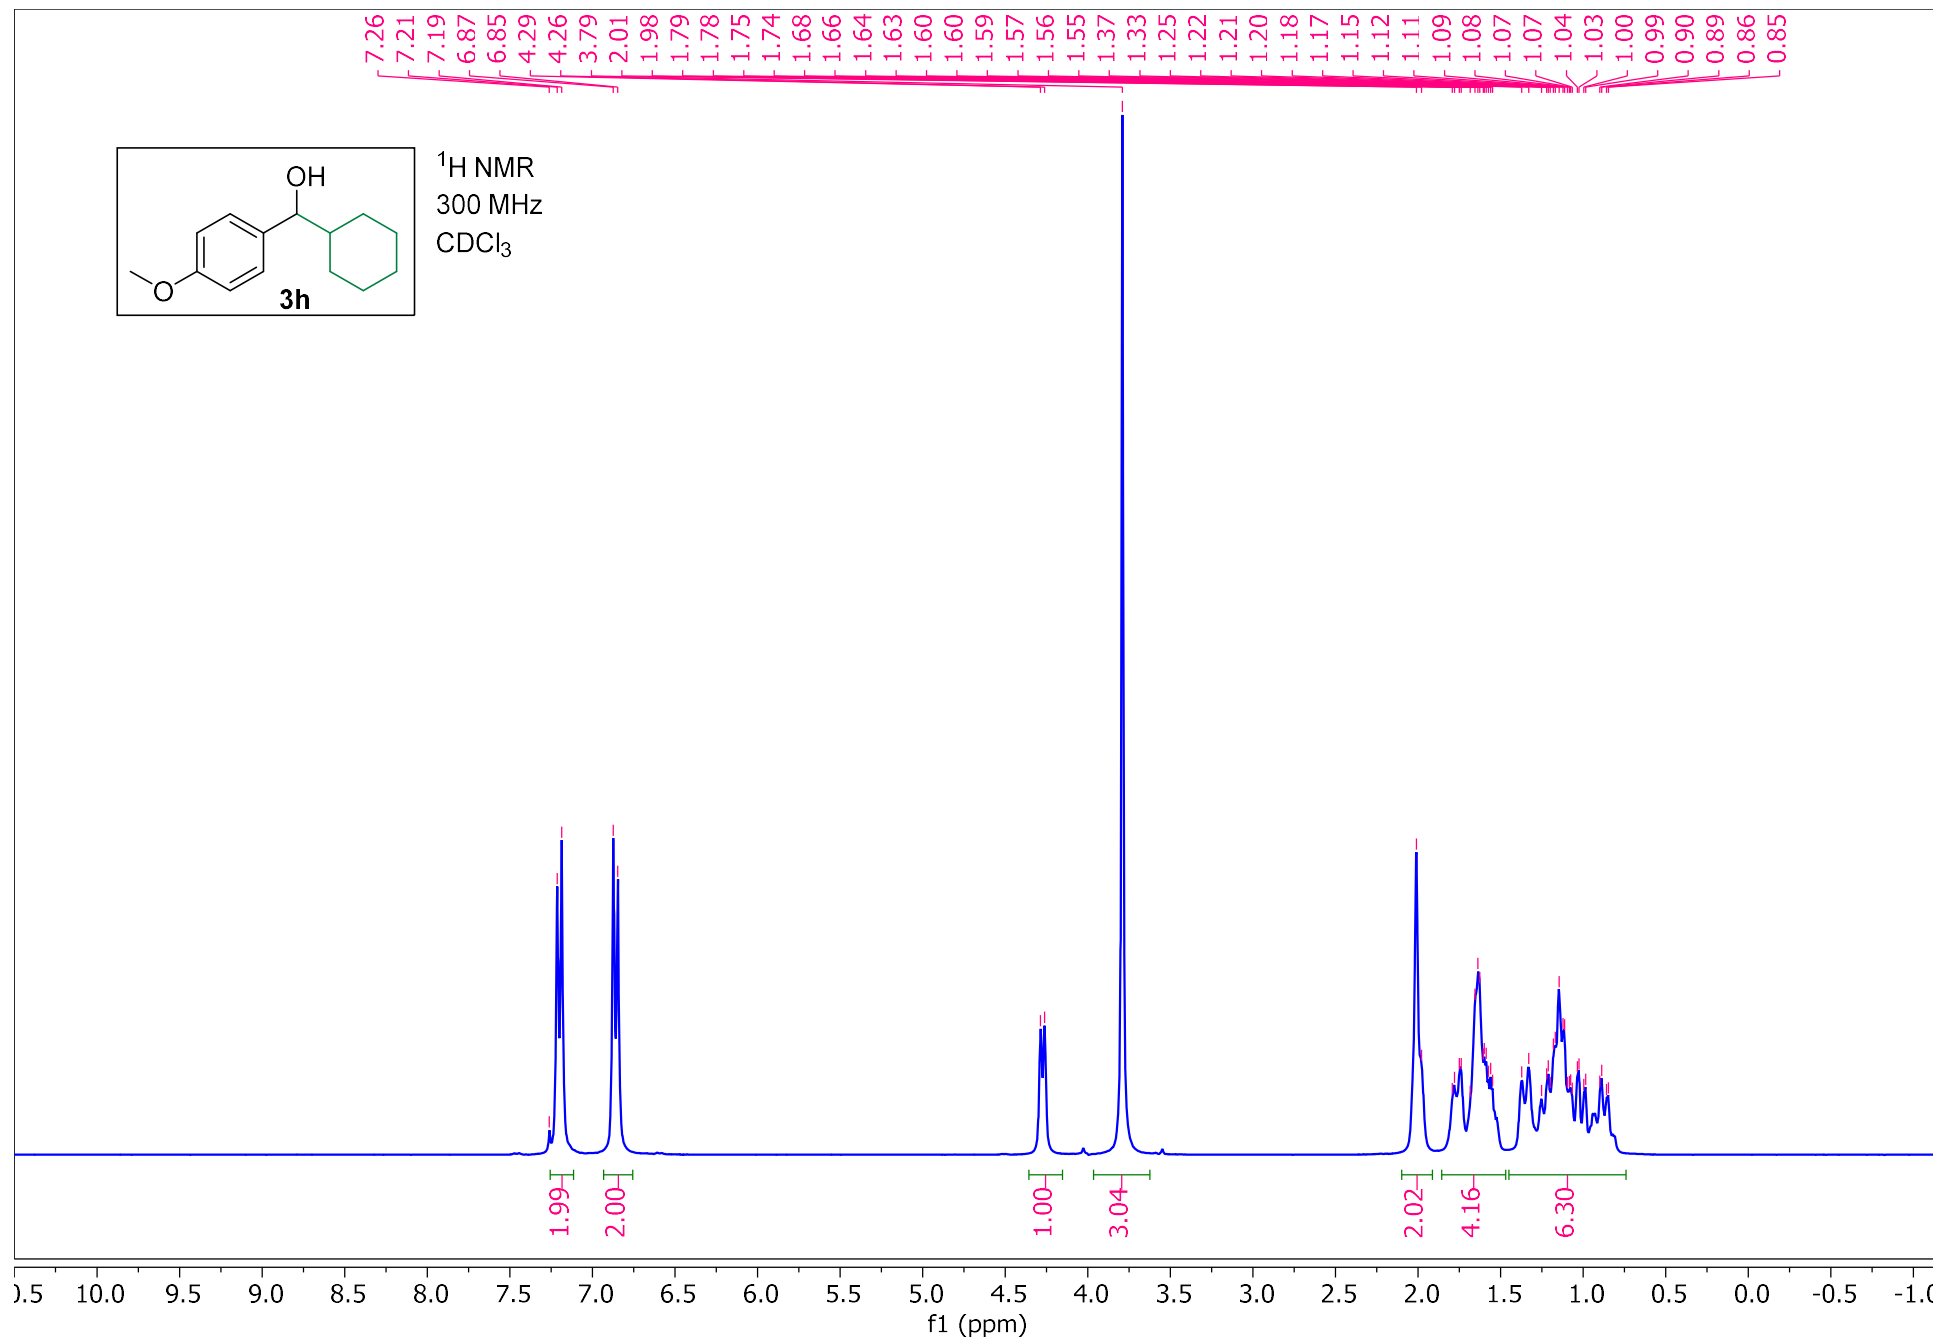

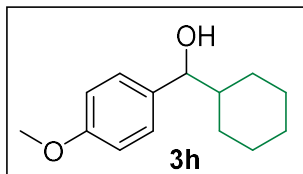

$^{13}\text{C}\{^1\text{H}\}$  NMR  
75 MHz  
 $\text{CDCl}_3$

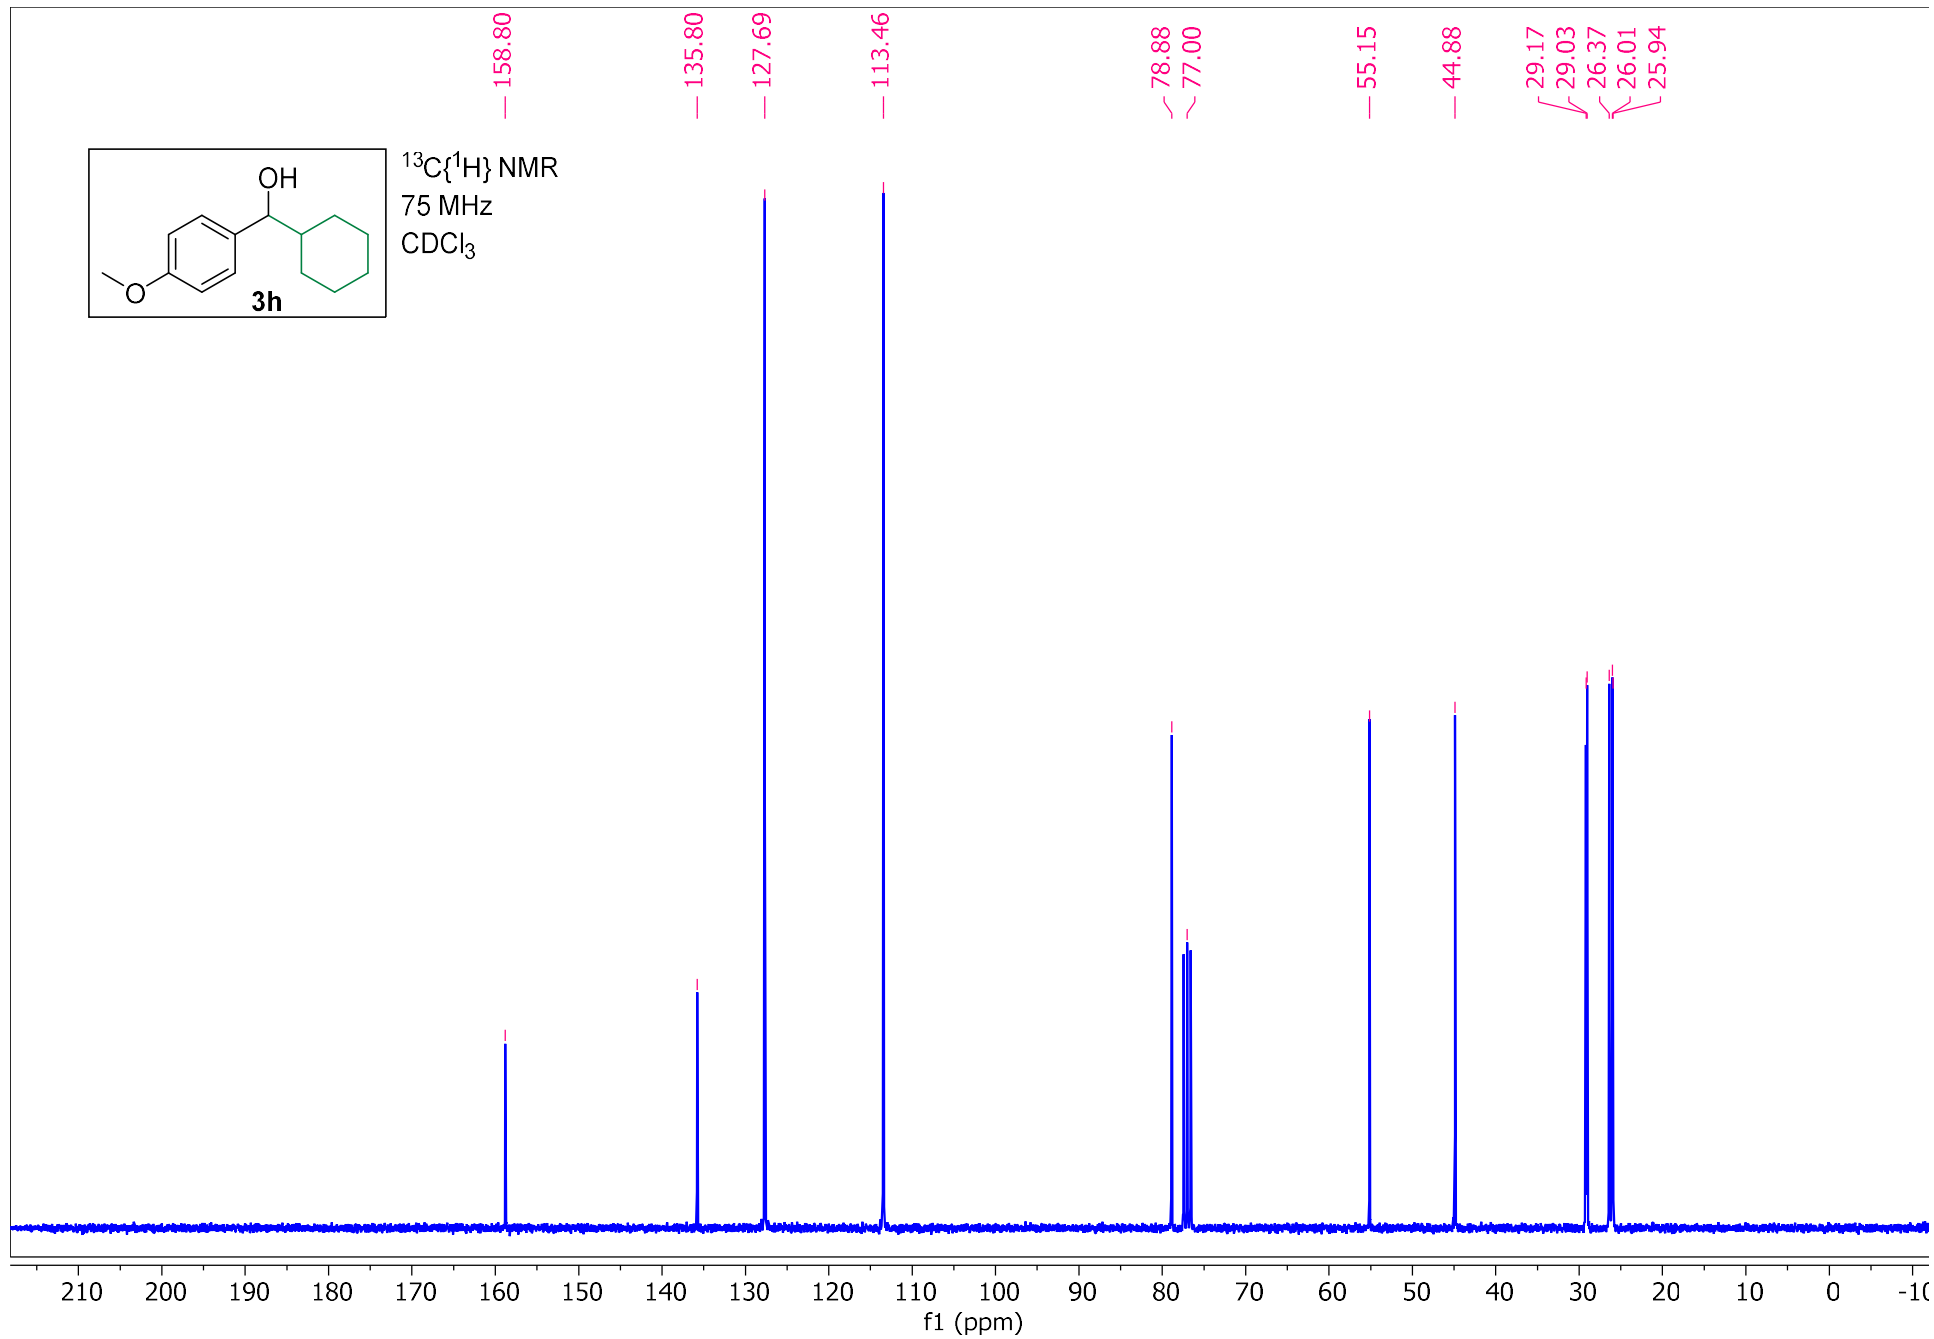

S80



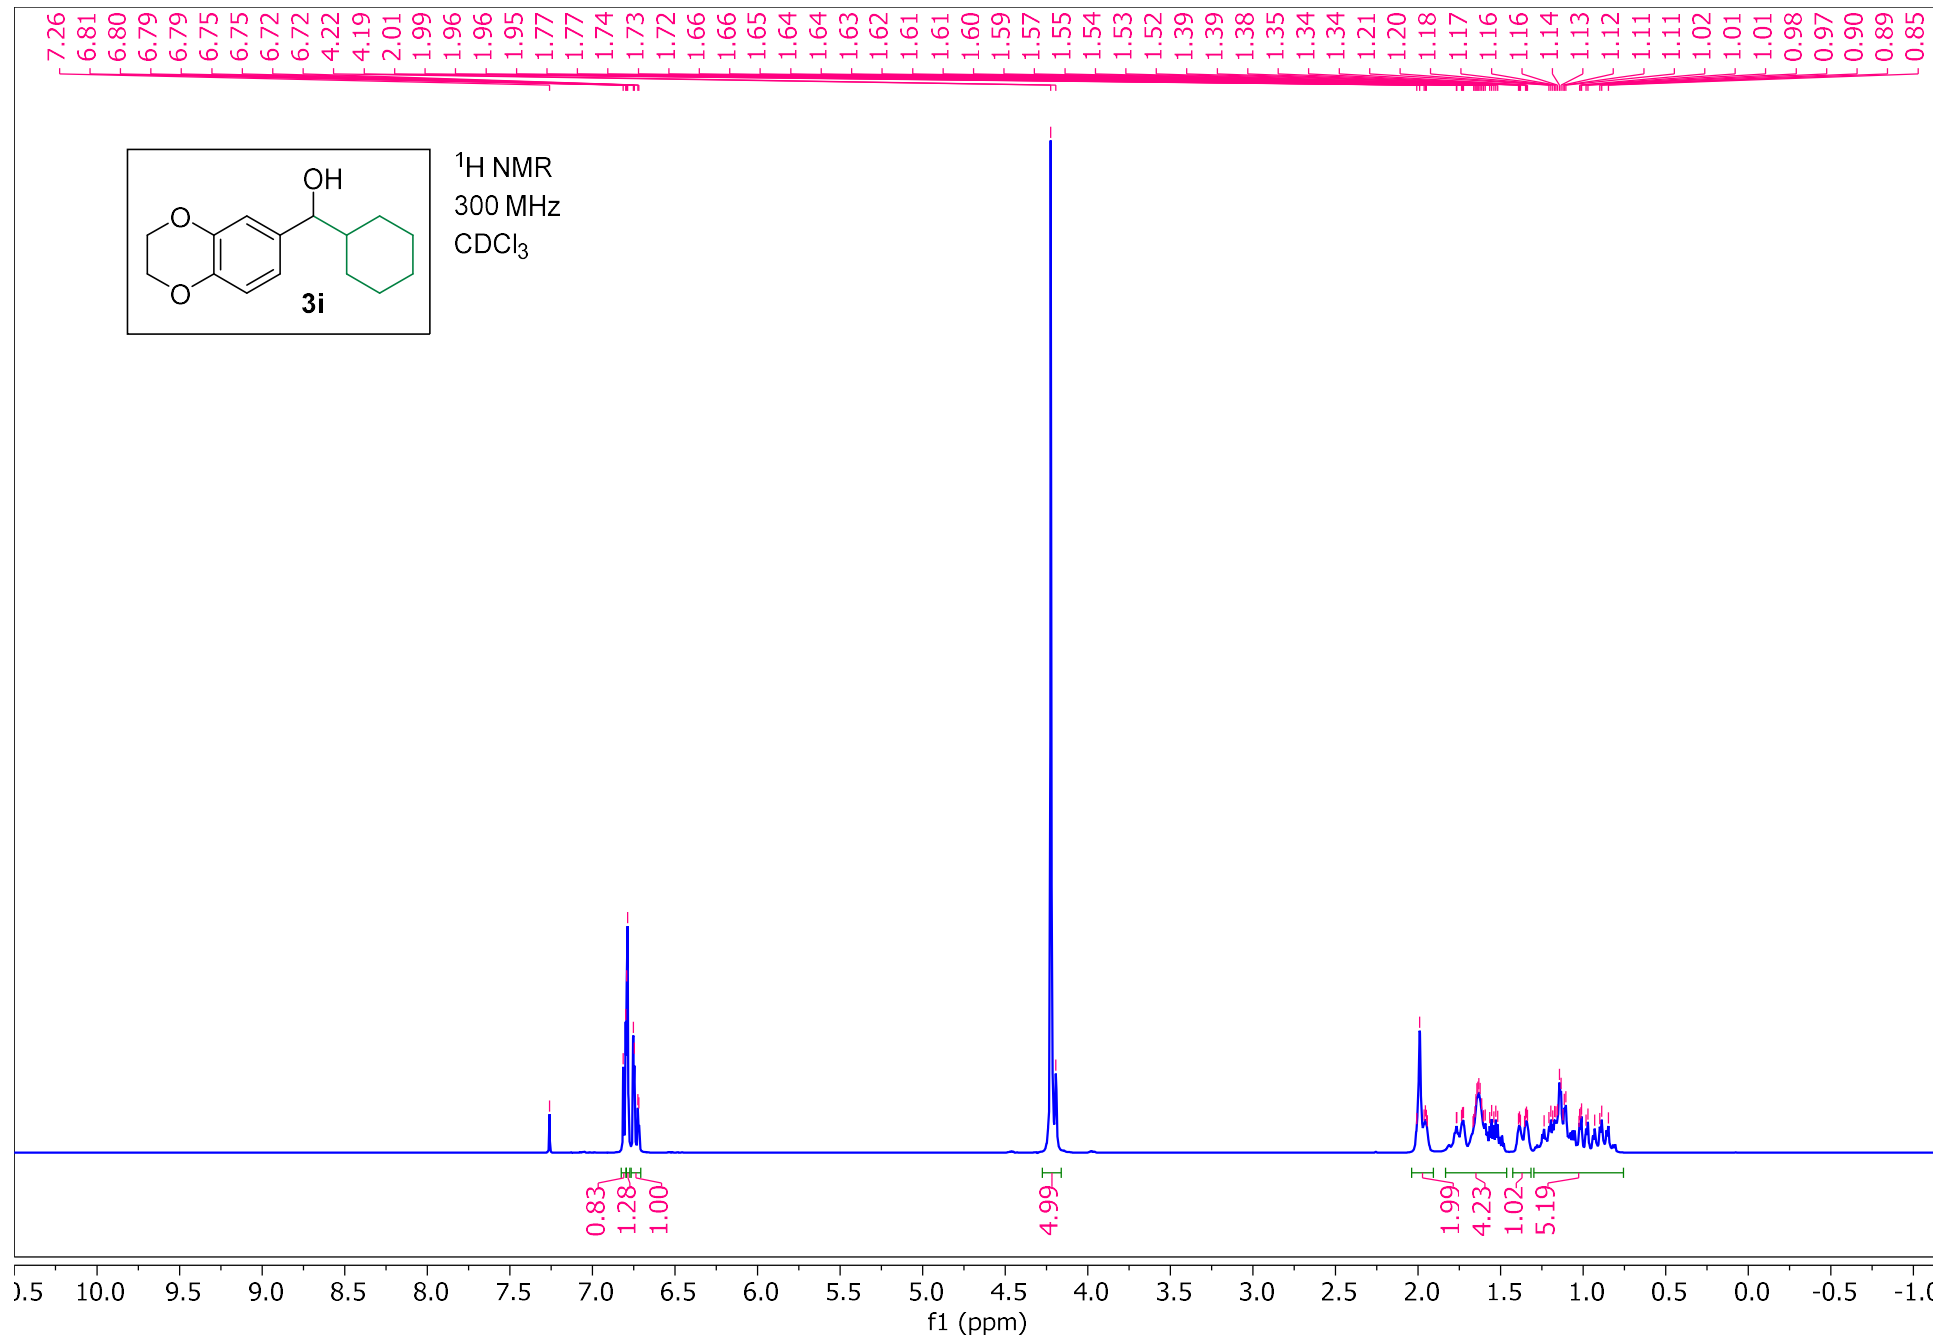

S81

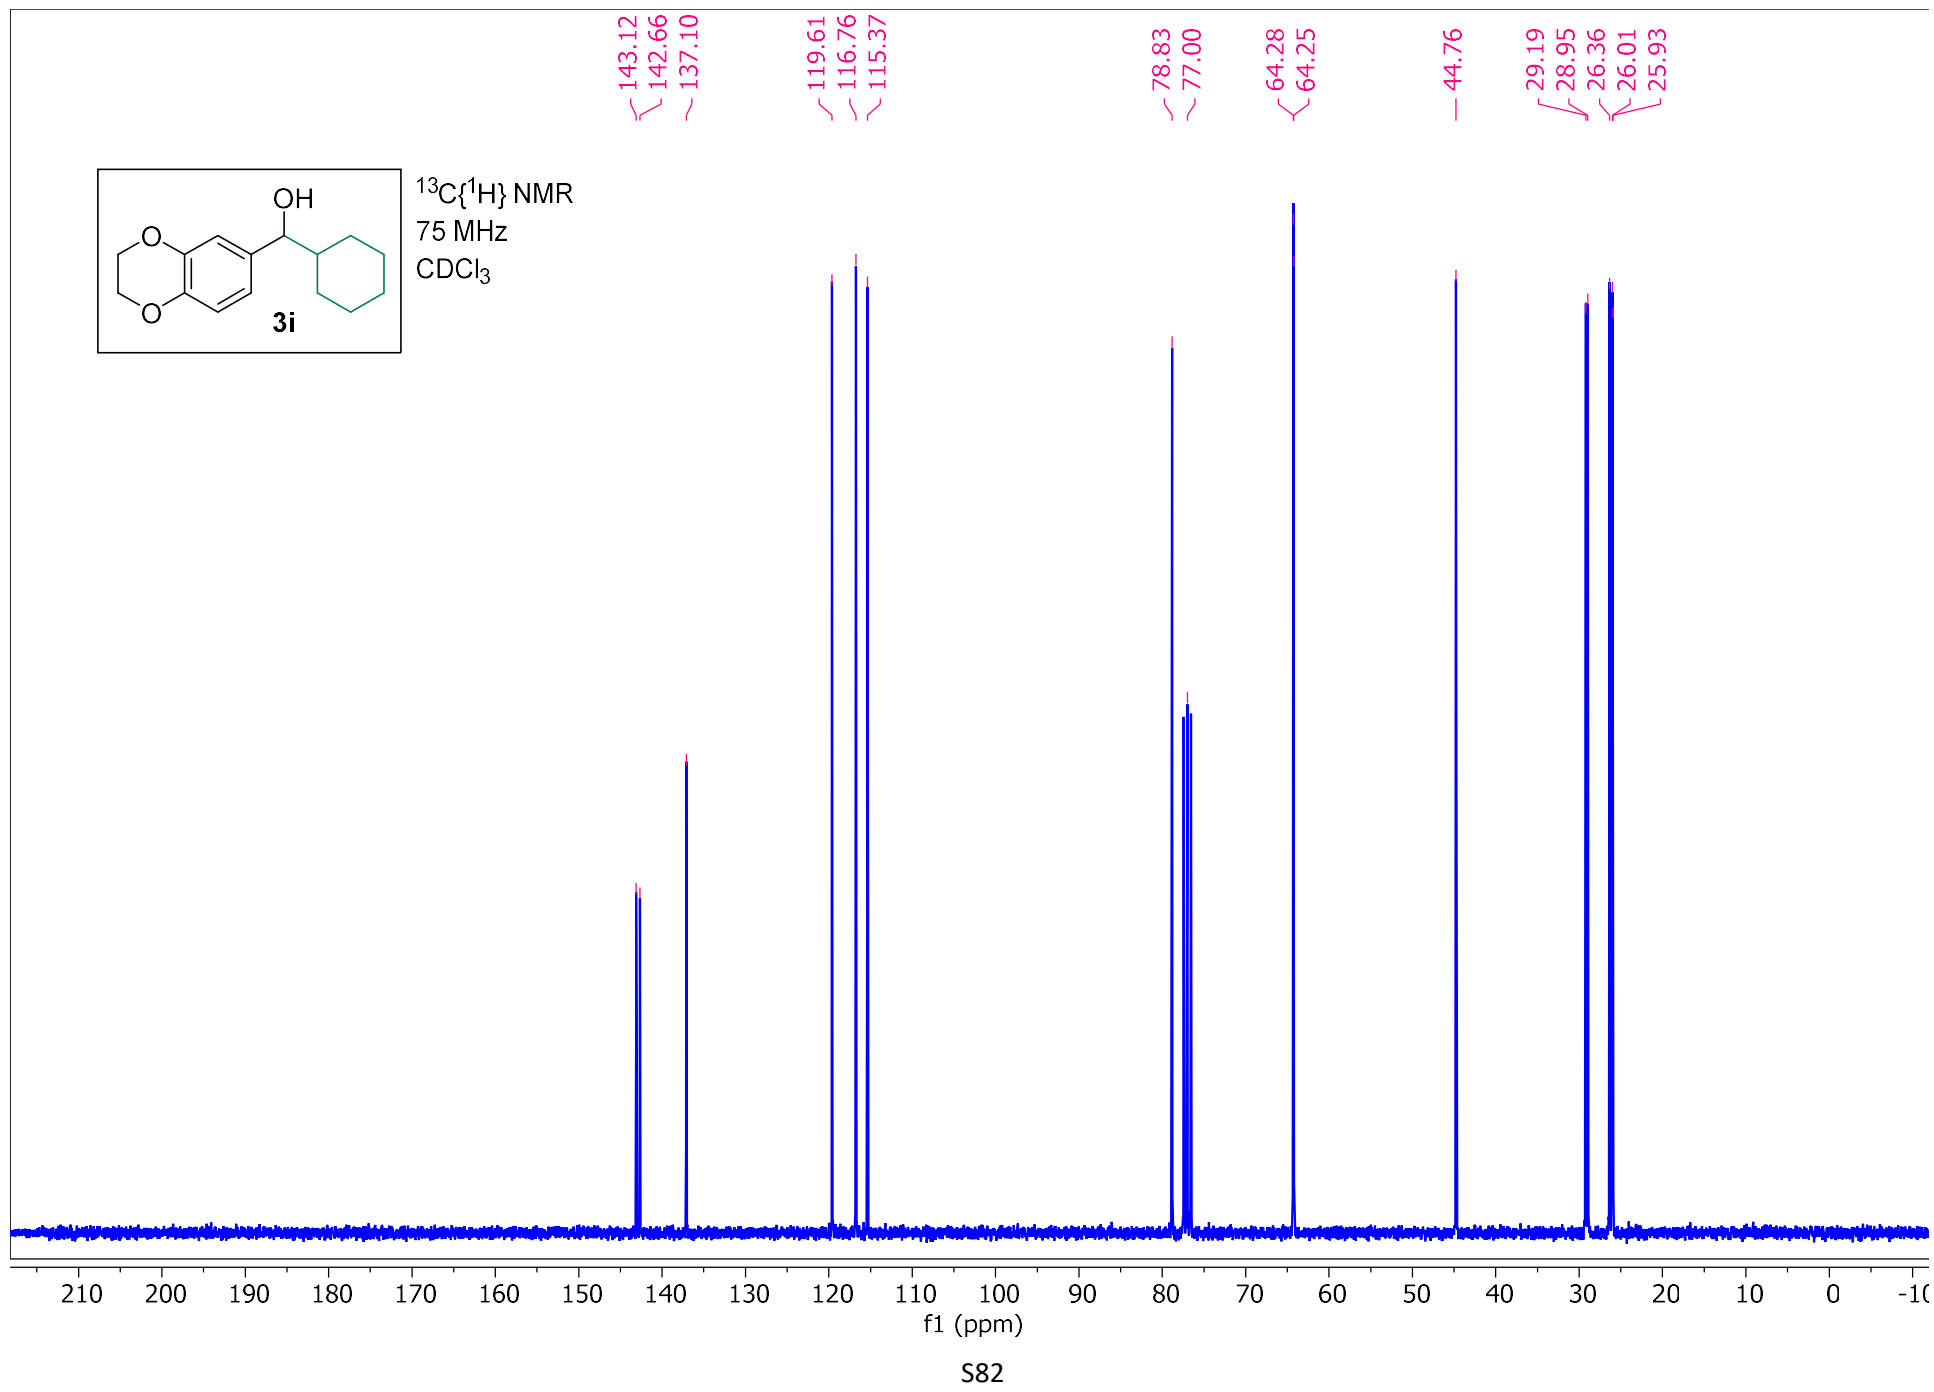

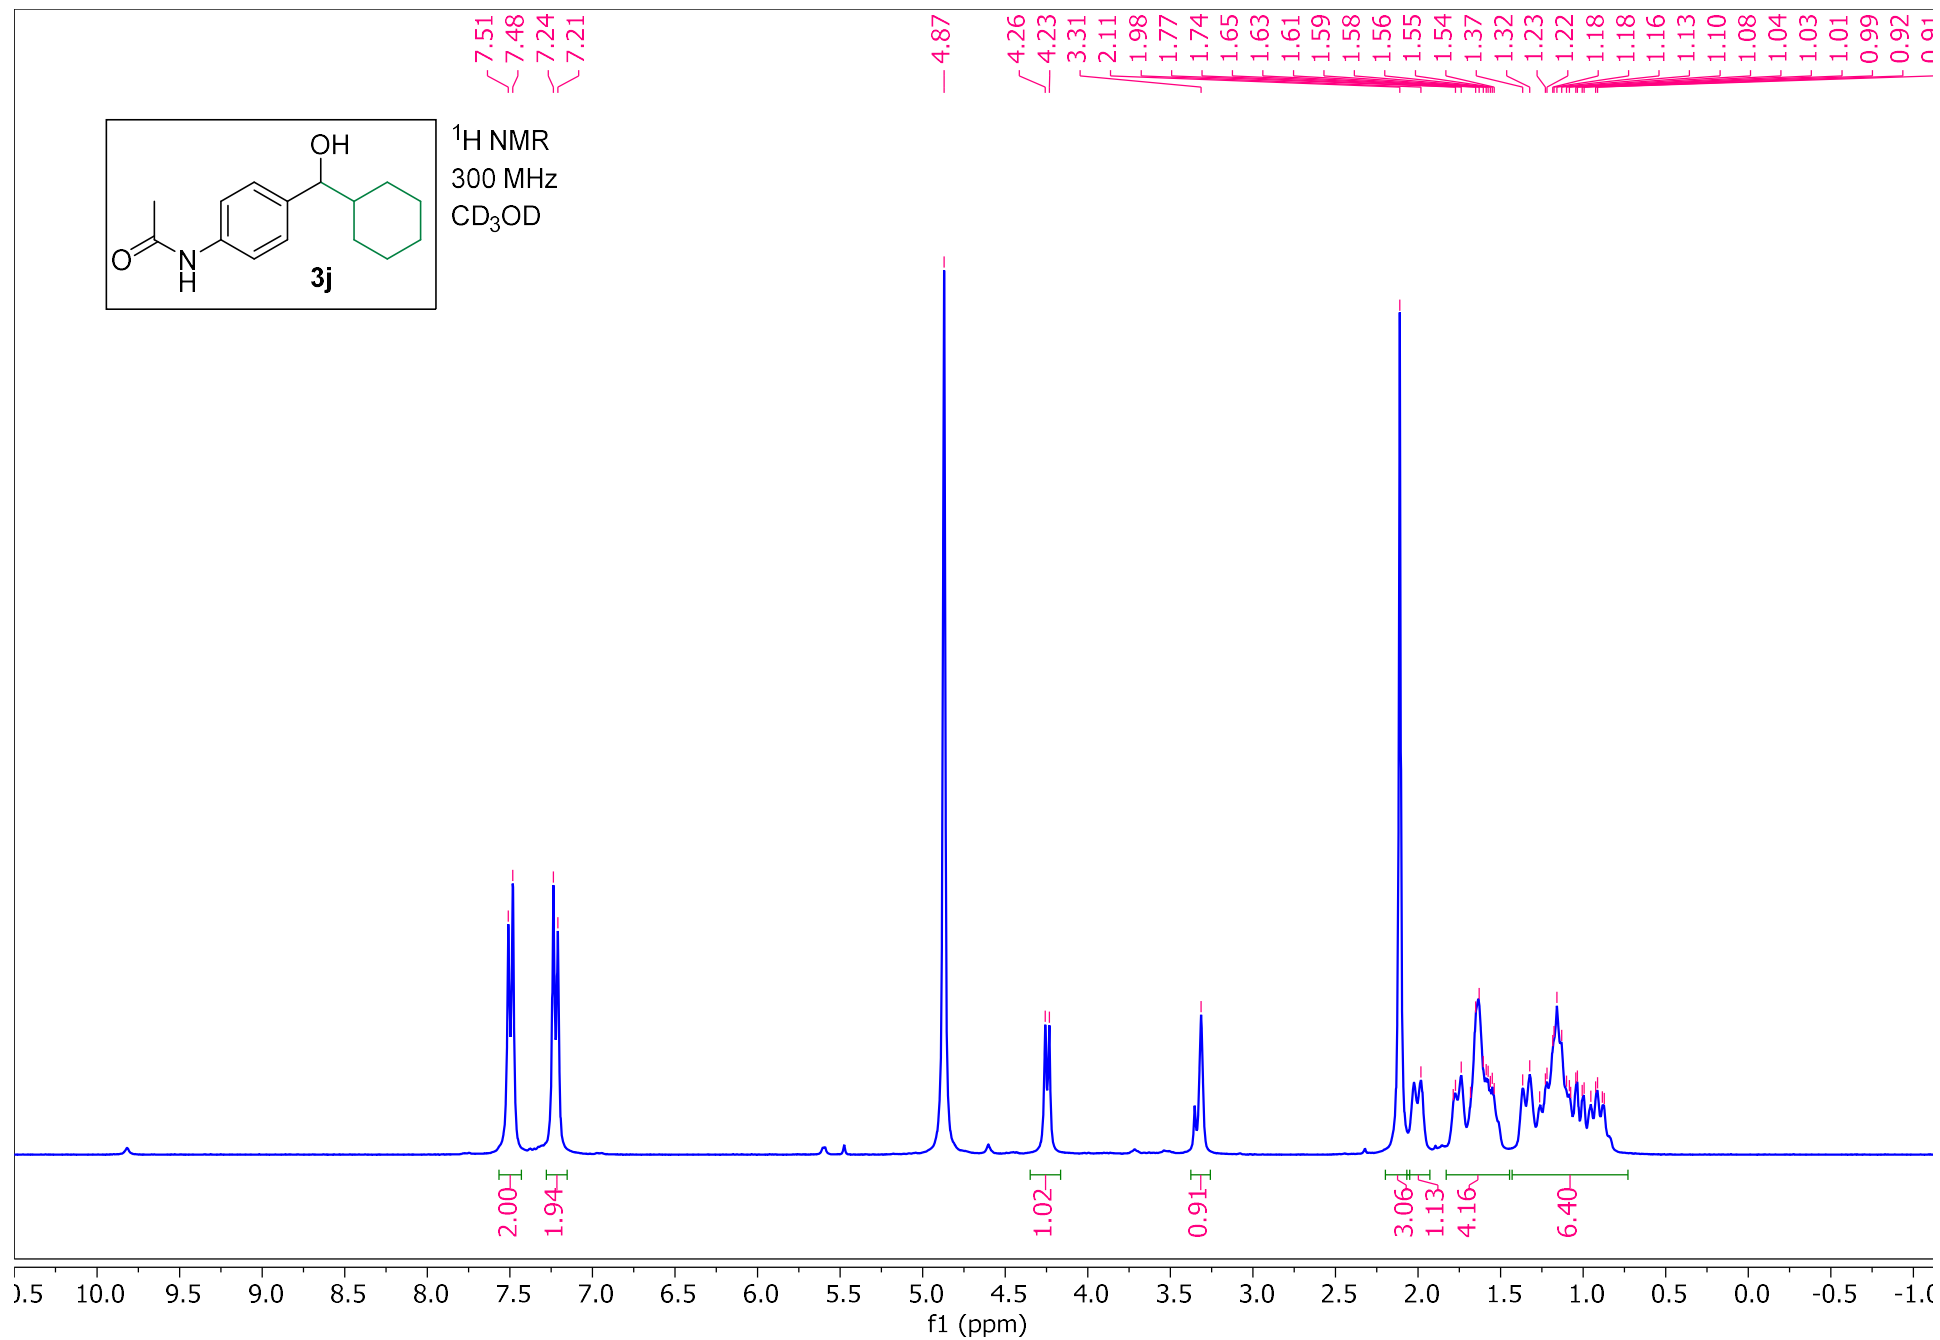

S83

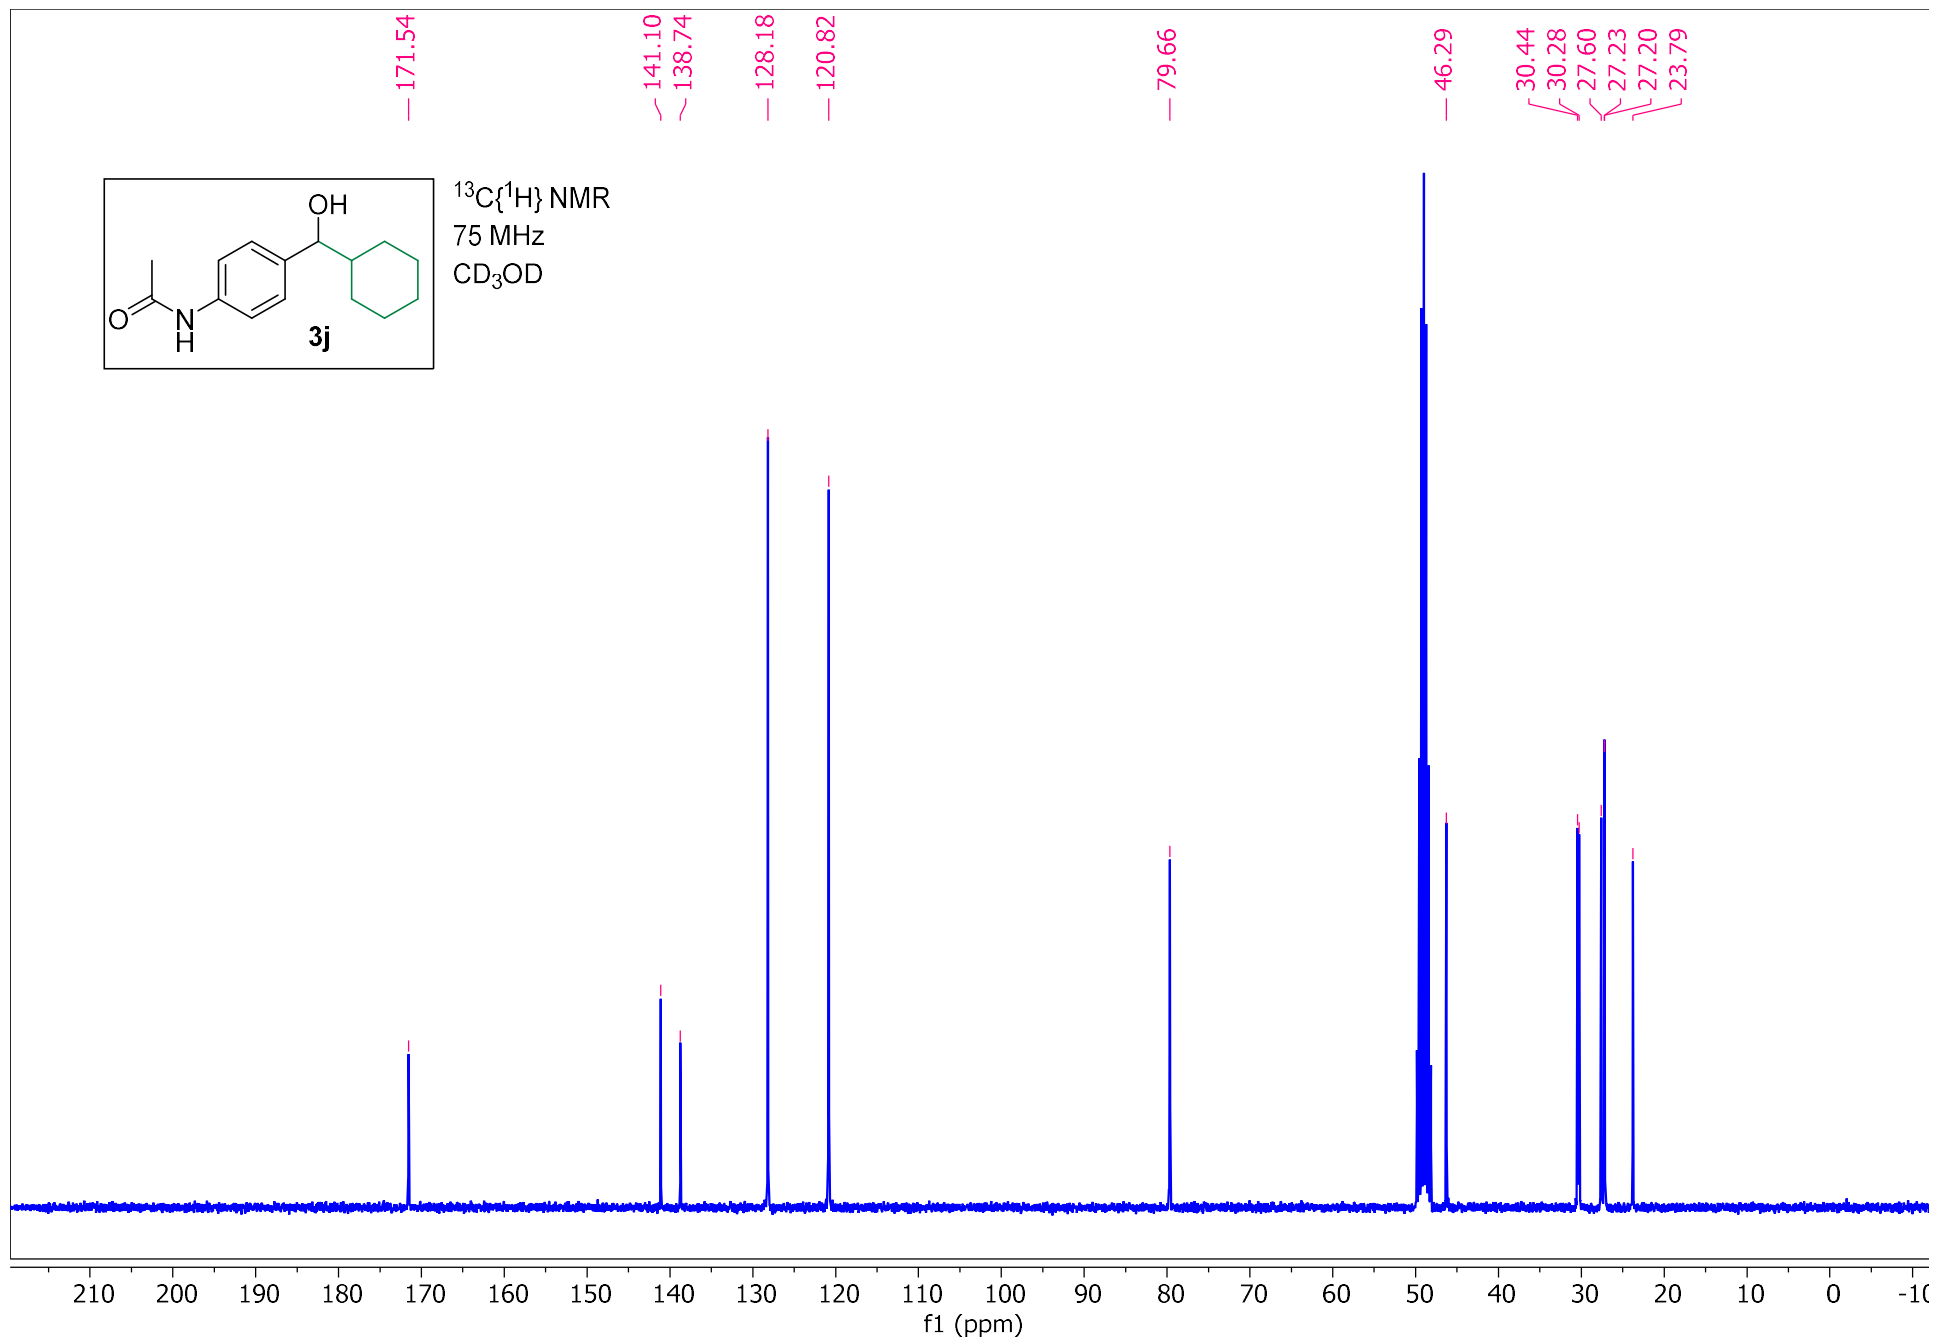

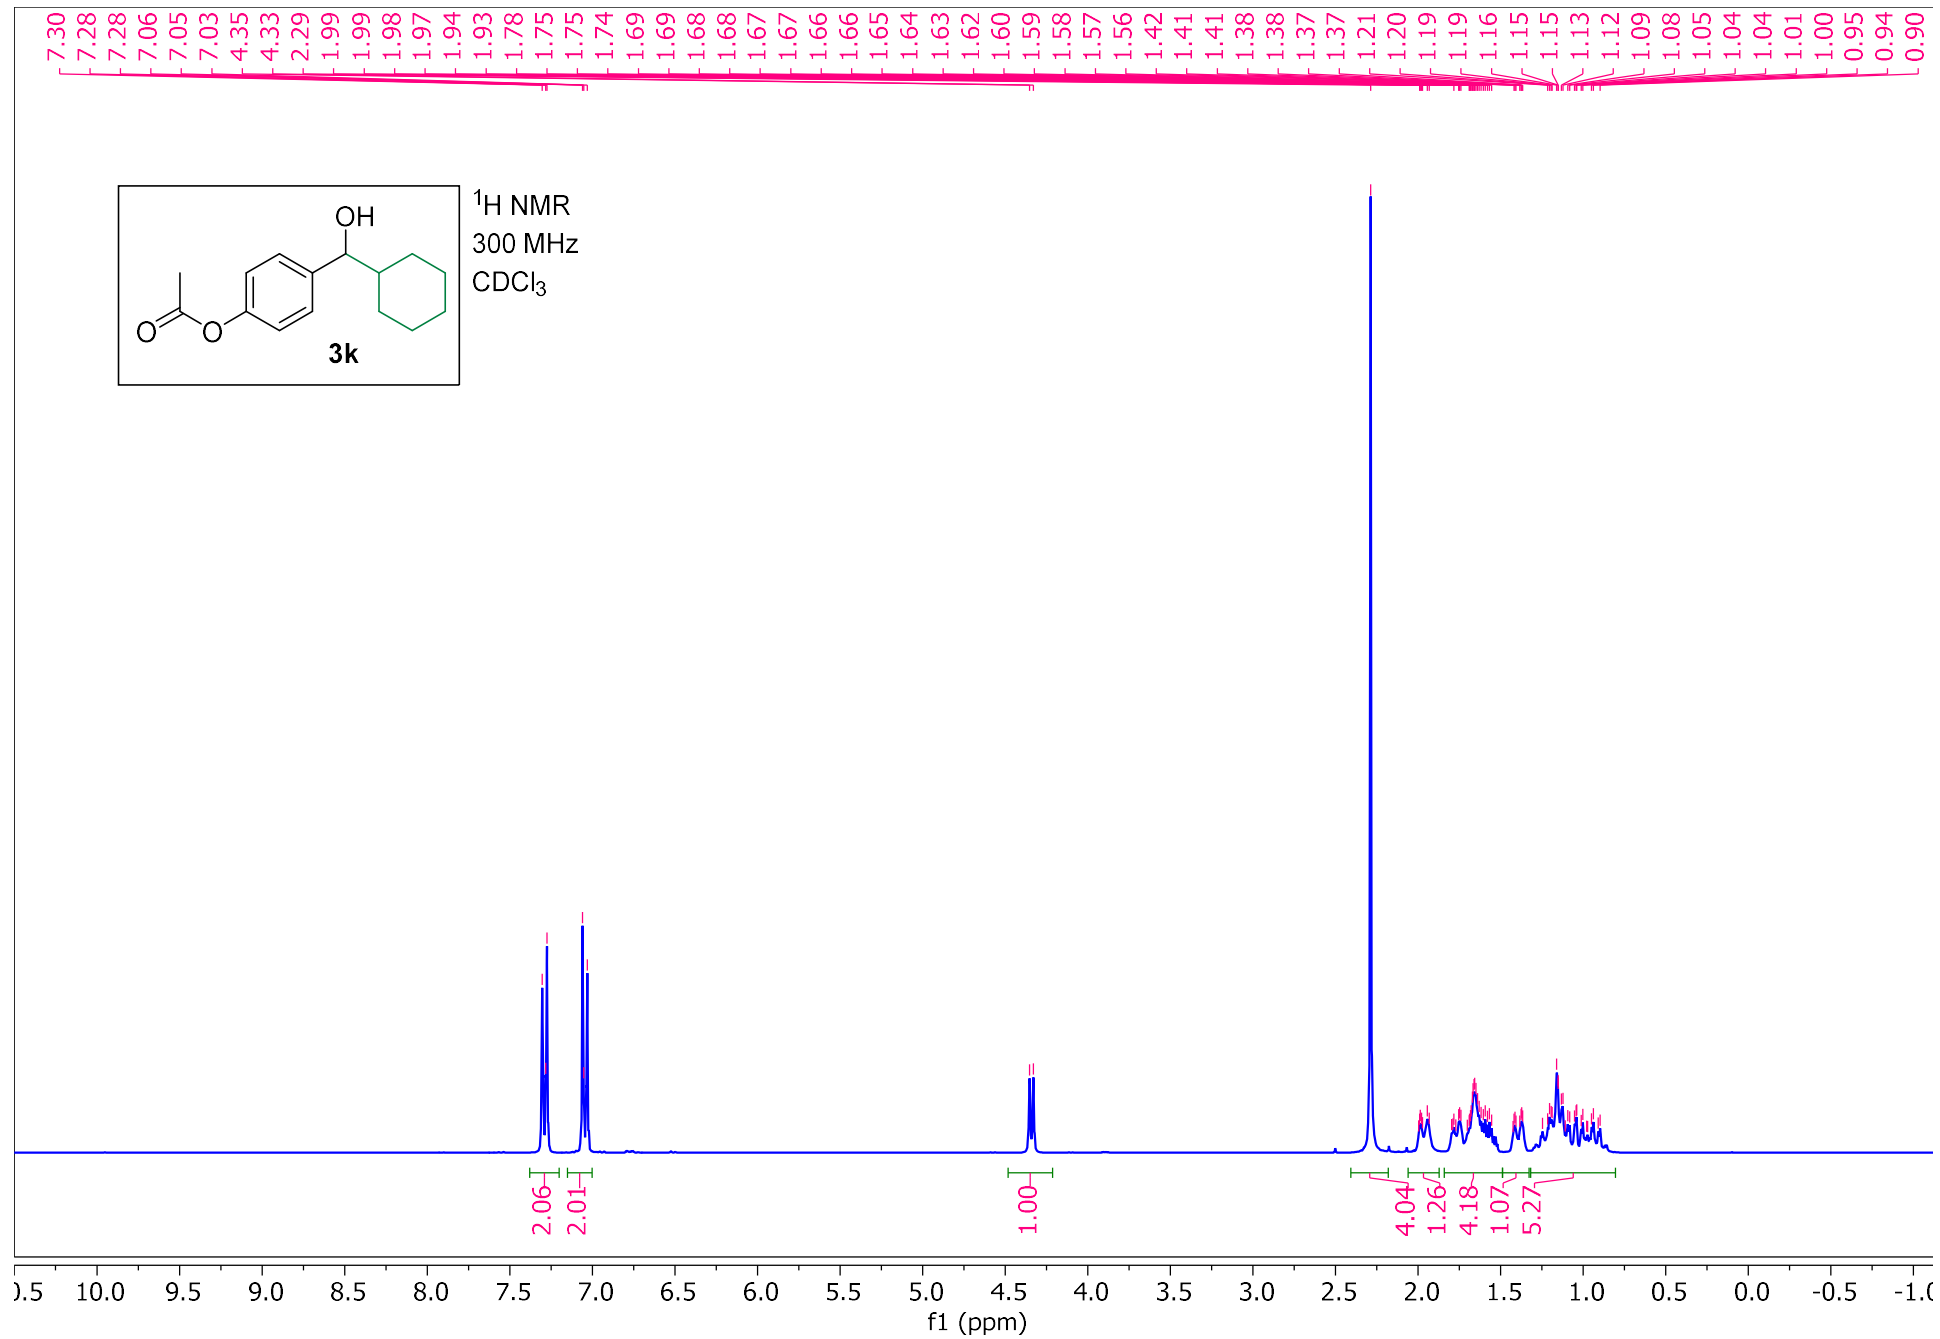

S85

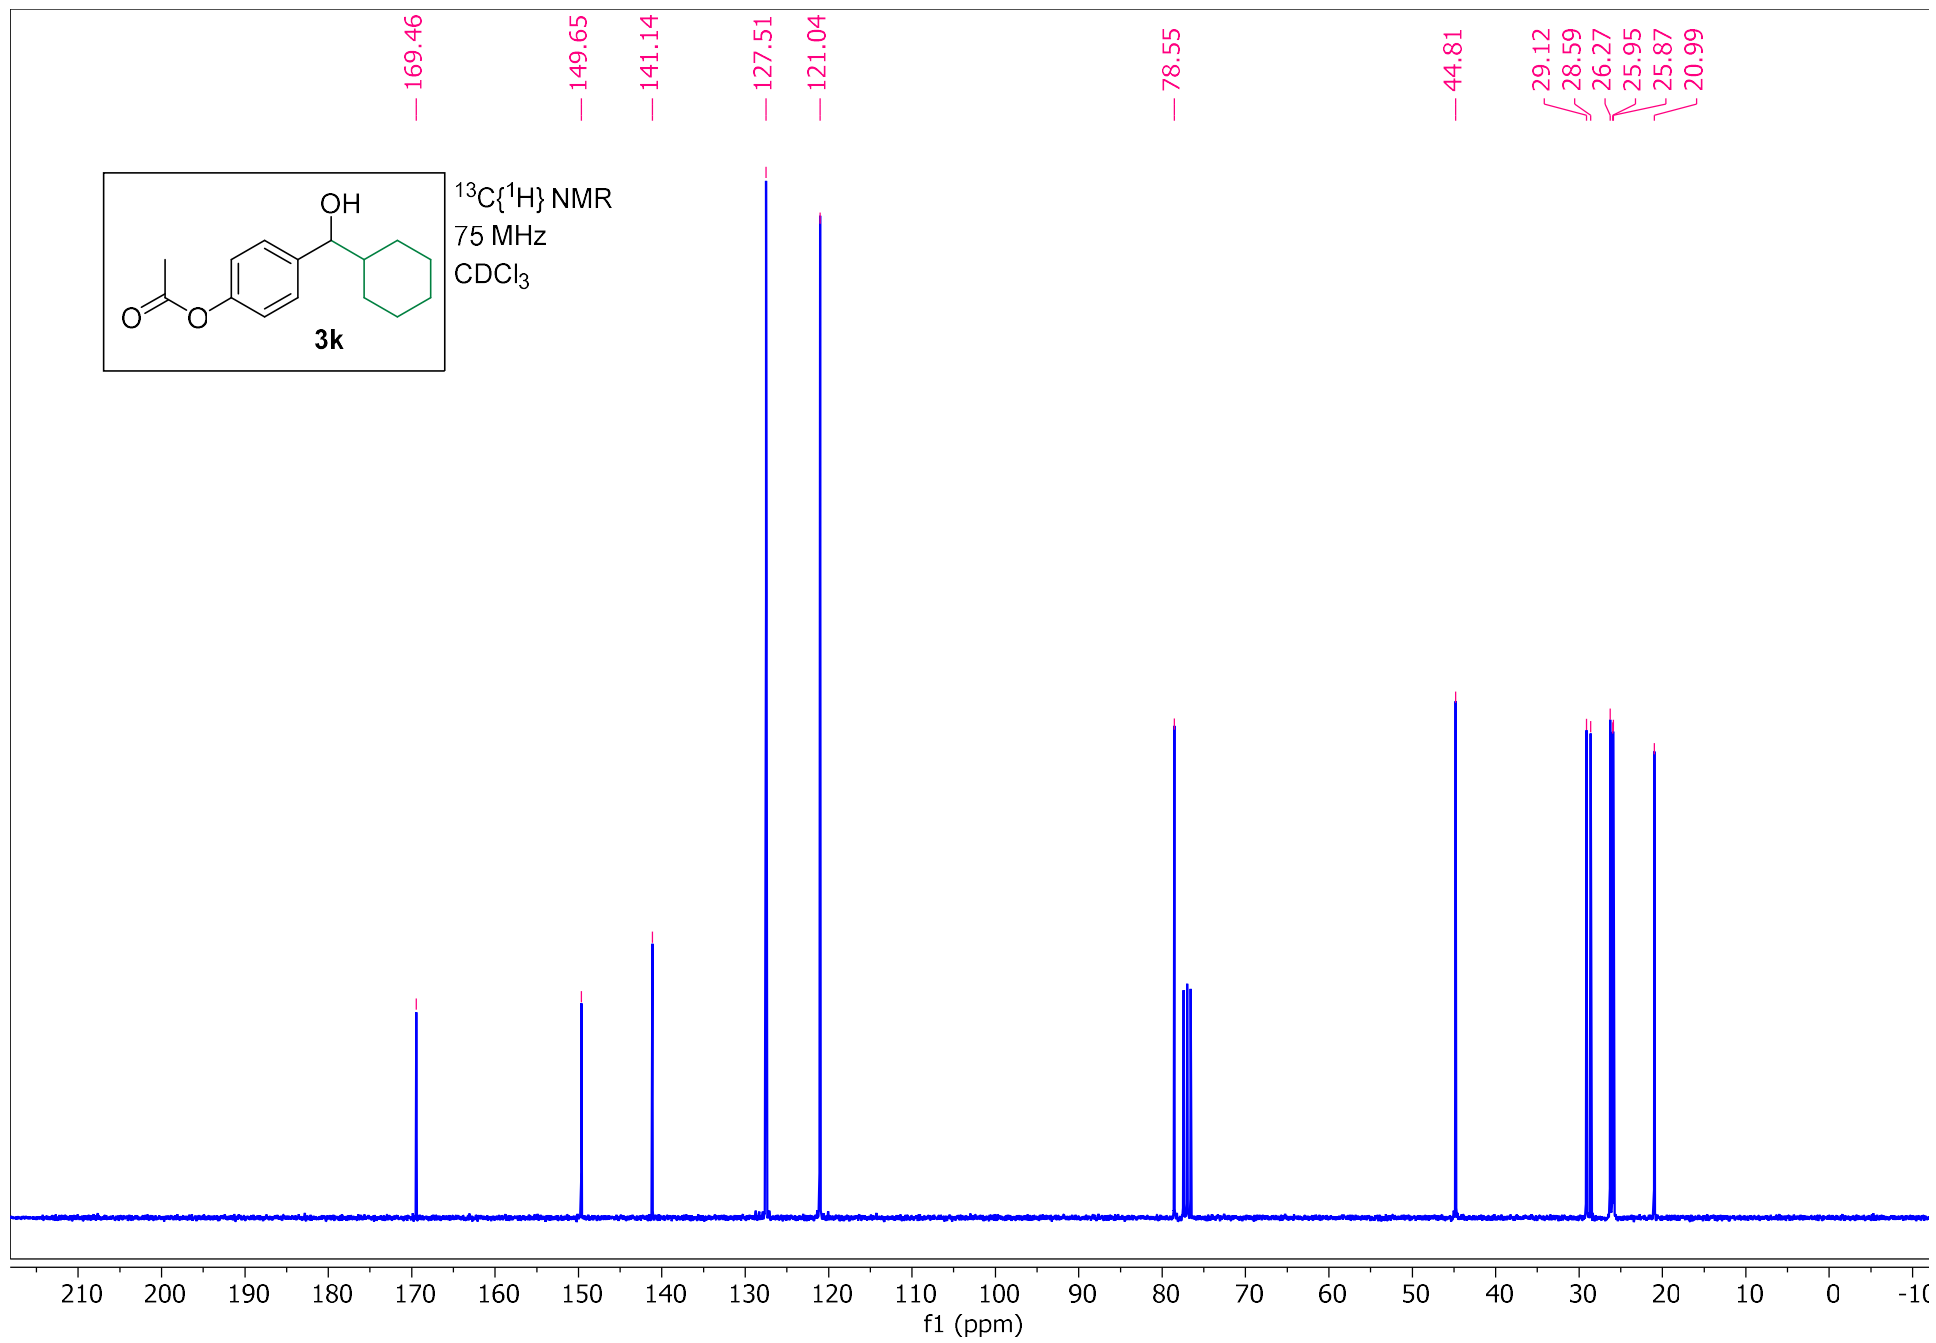

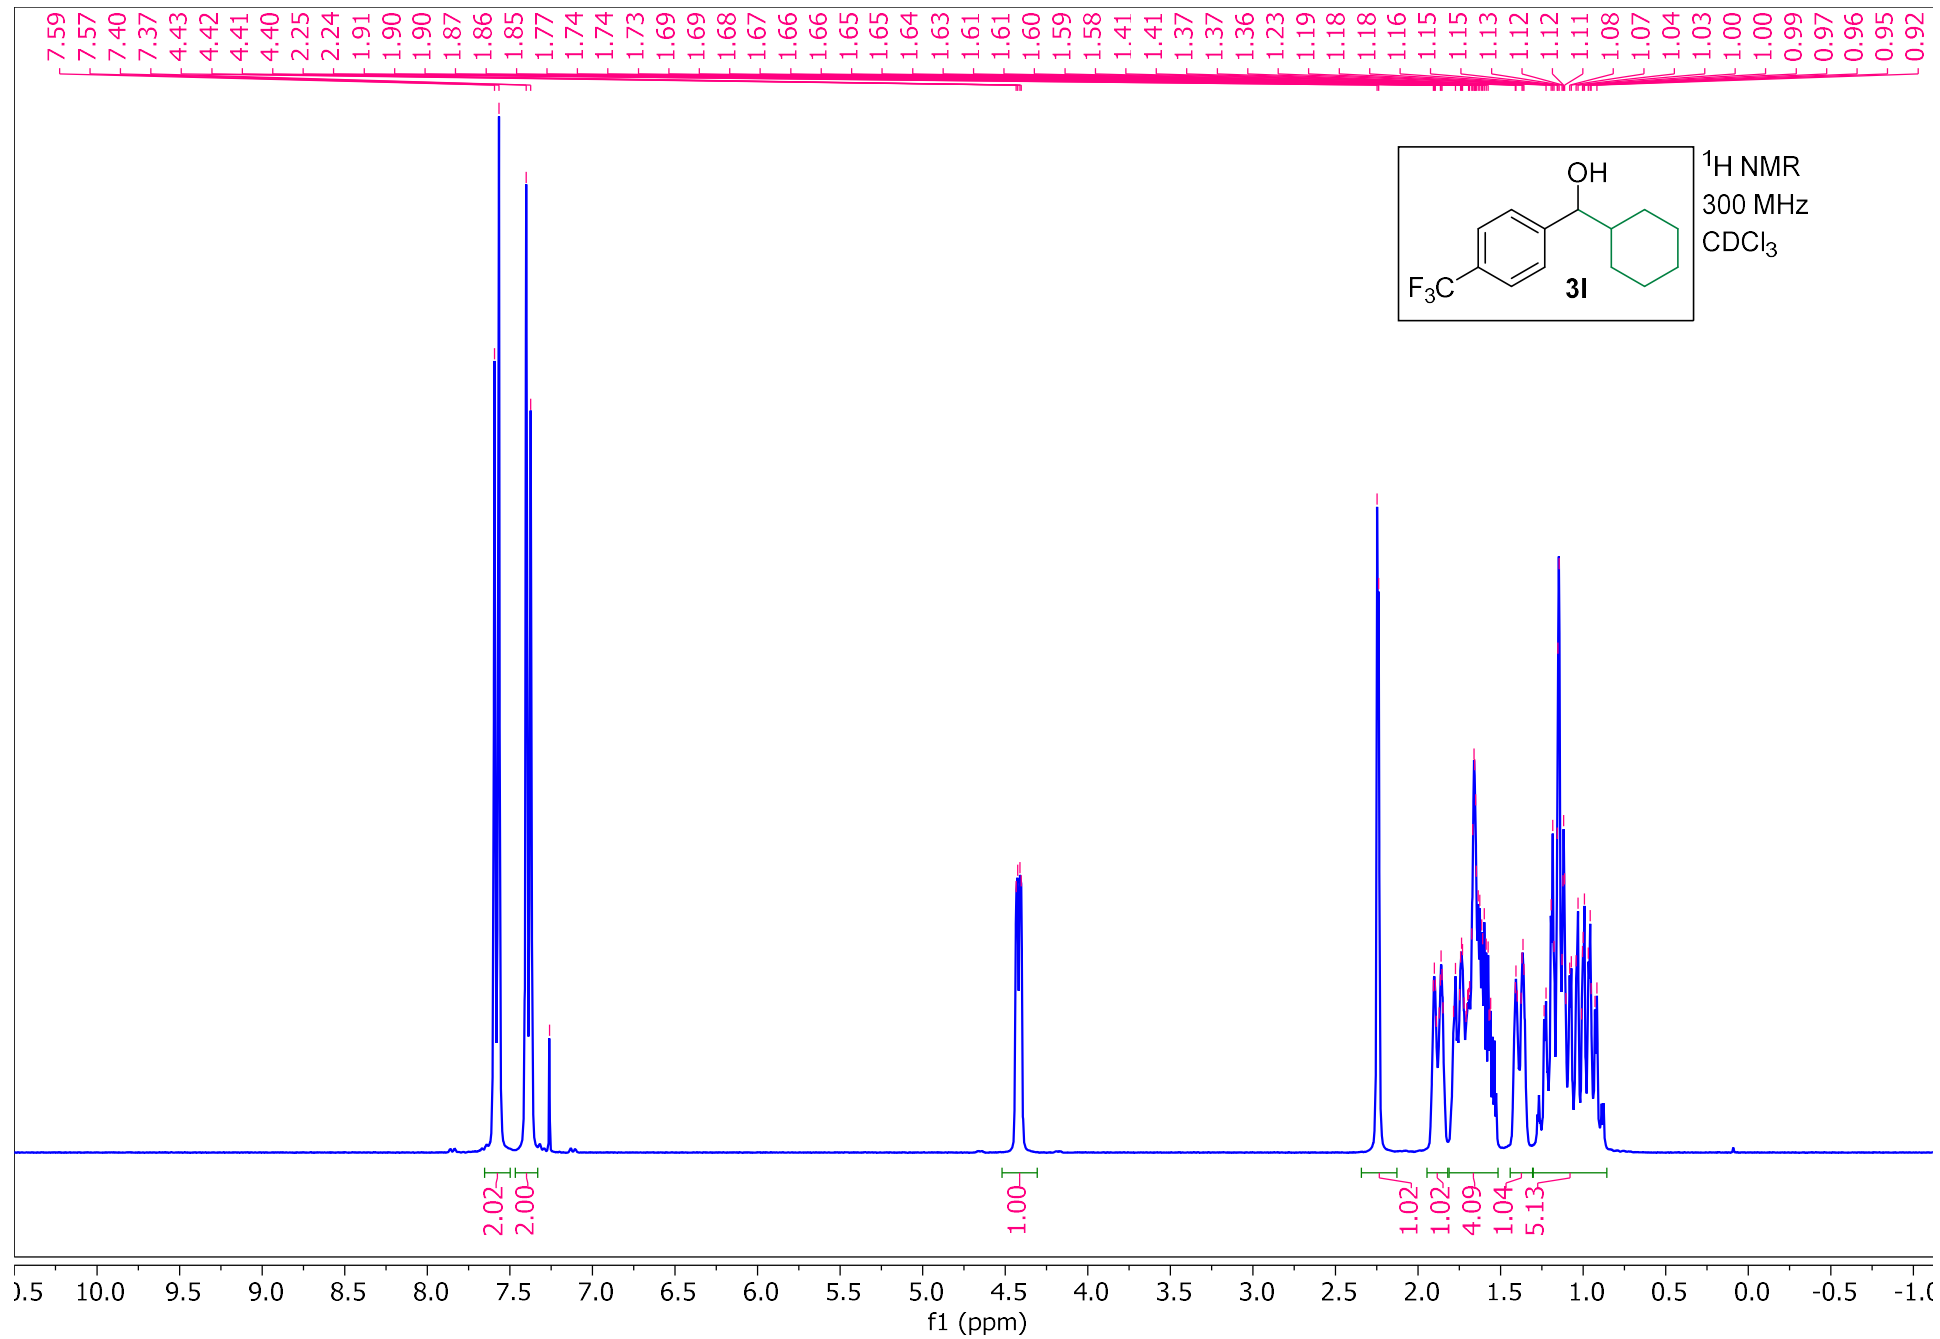

S87

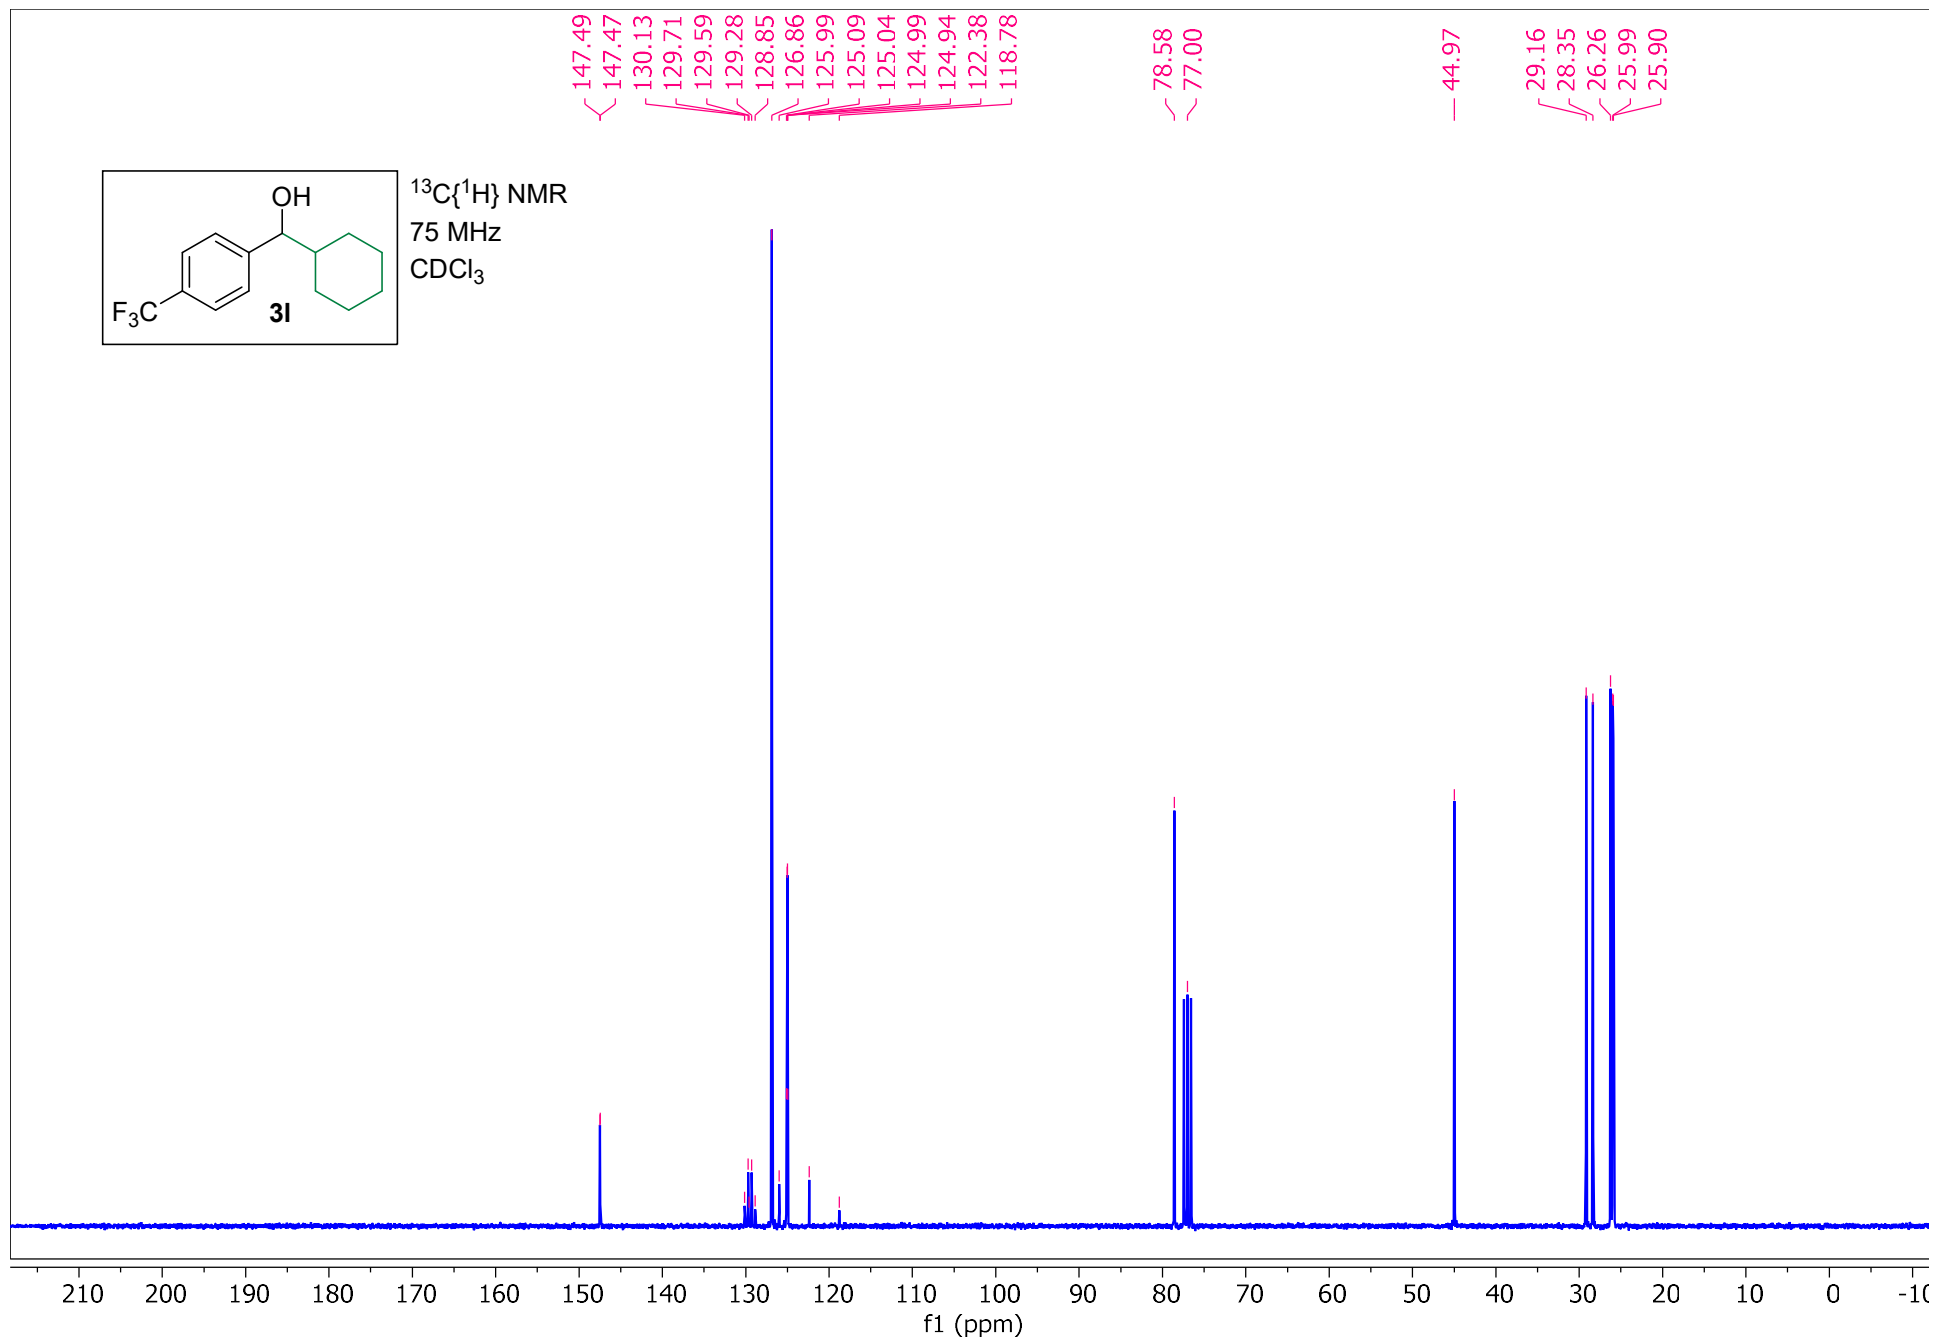

S88



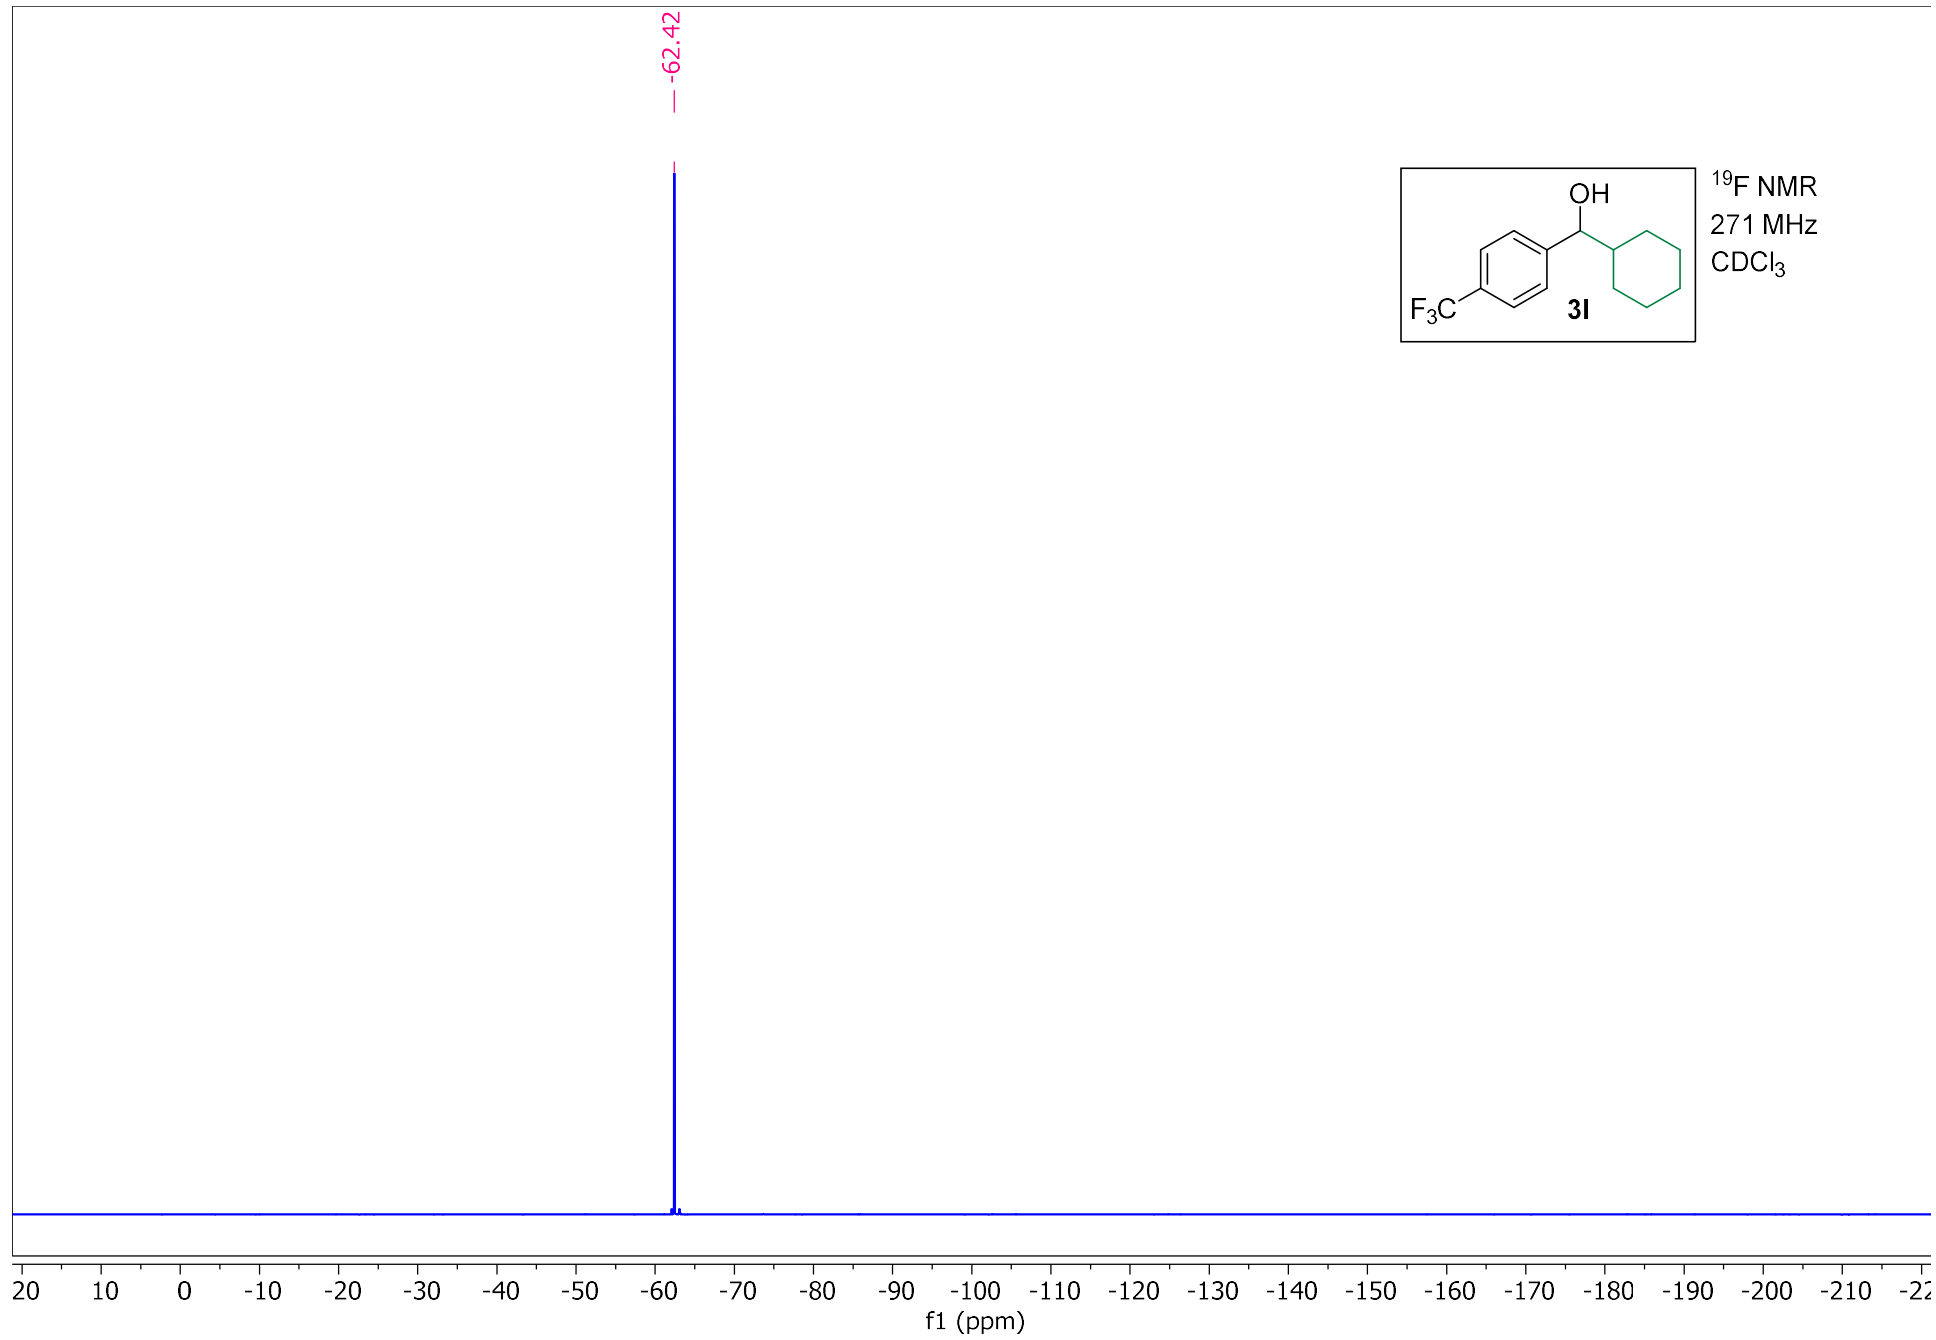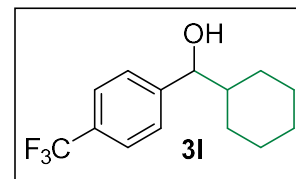

<sup>19</sup>F NMR  
271 MHz  
CDCl<sub>3</sub>

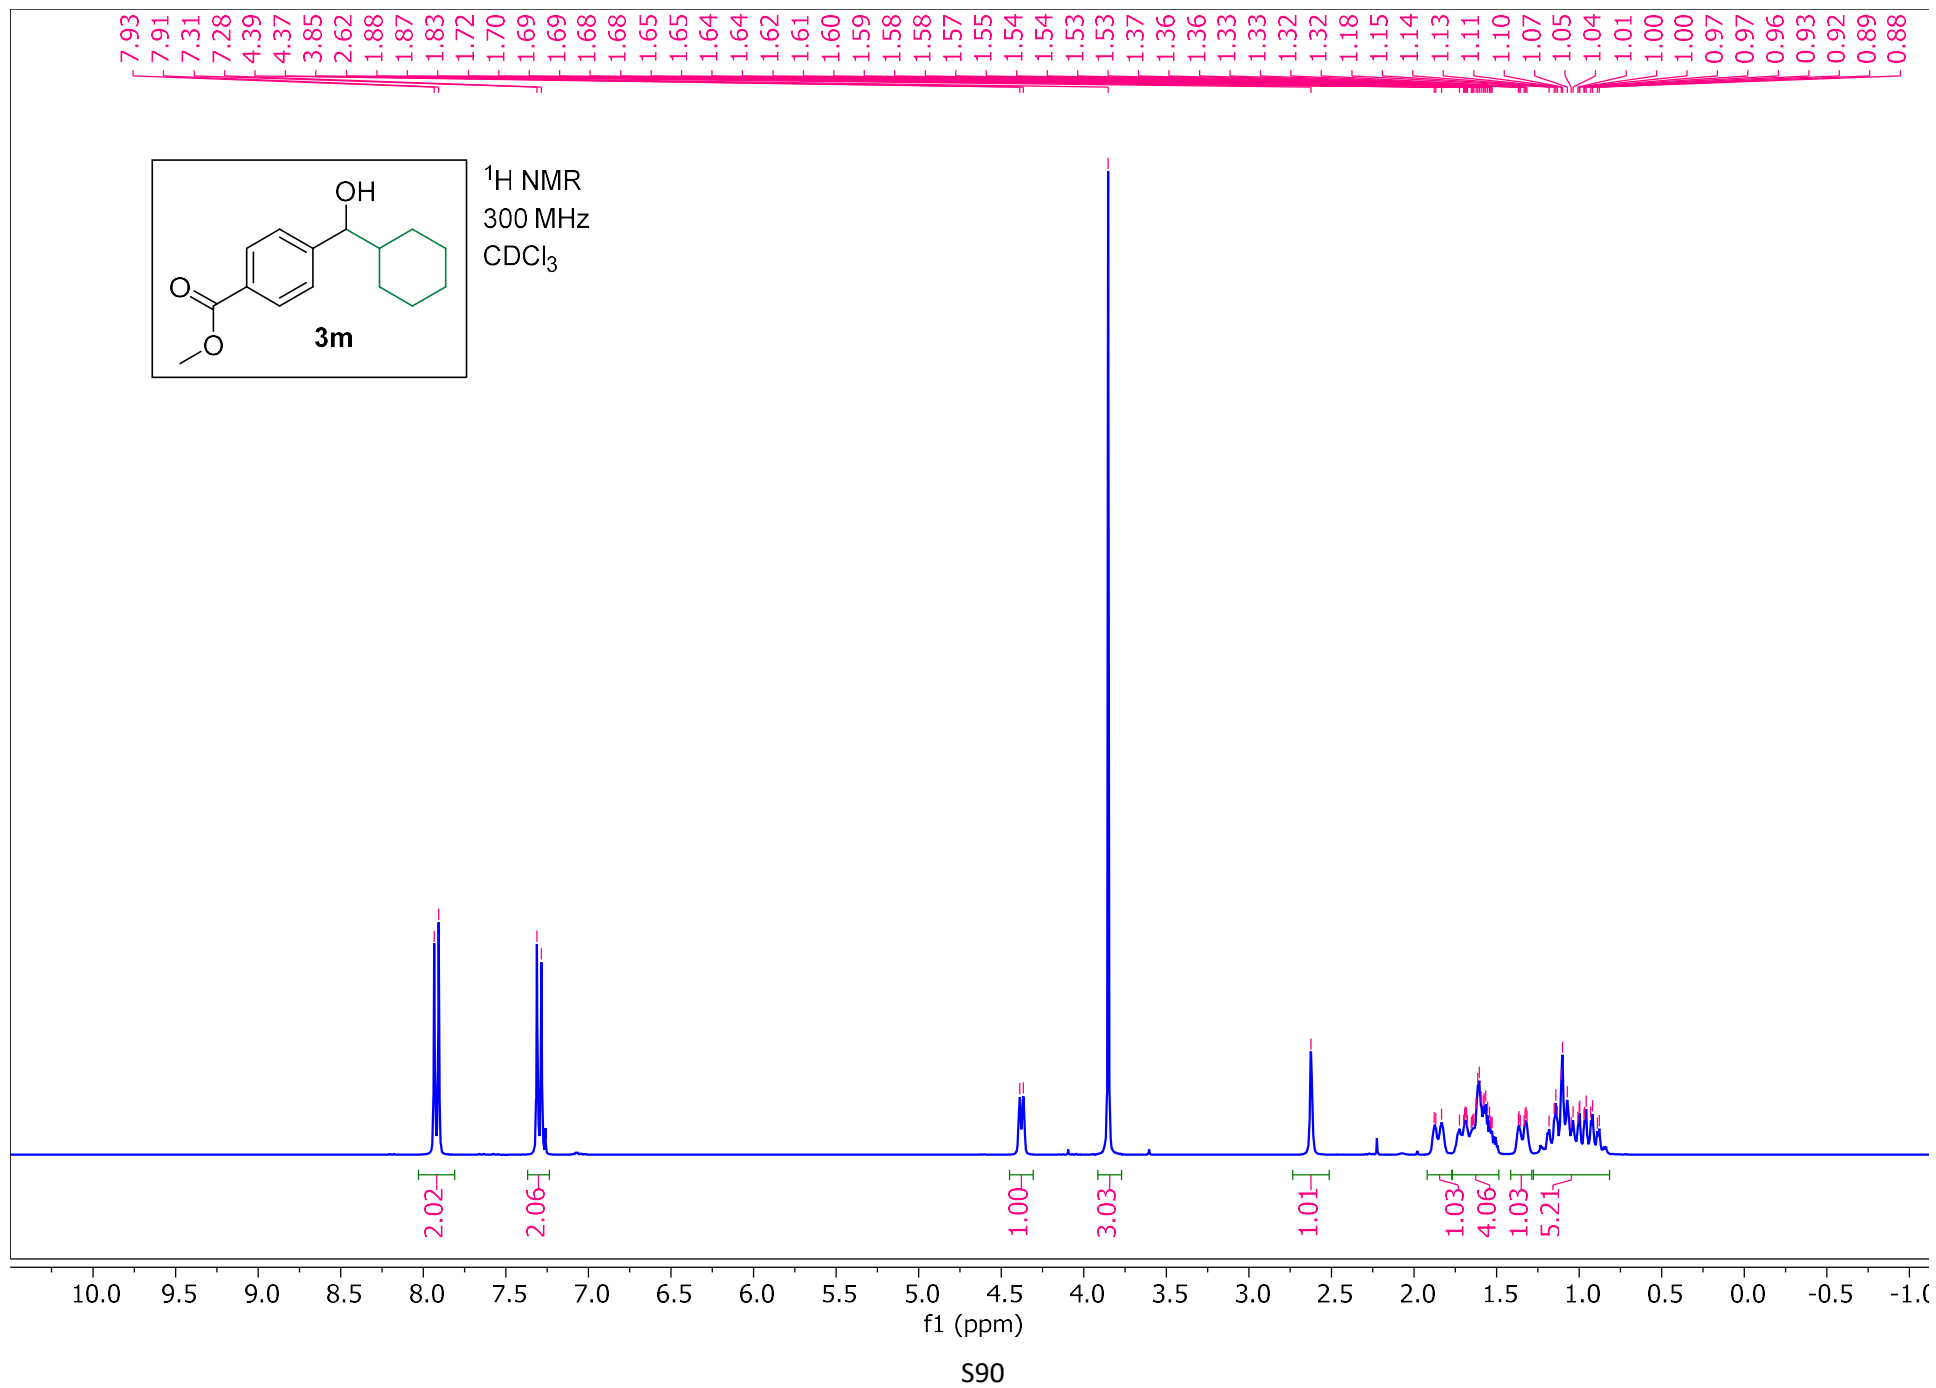

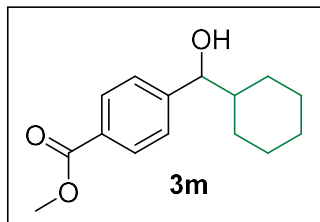

$^{13}\text{C}\{^1\text{H}\}$  NMR  
75 MHz  
 $\text{CDCl}_3$

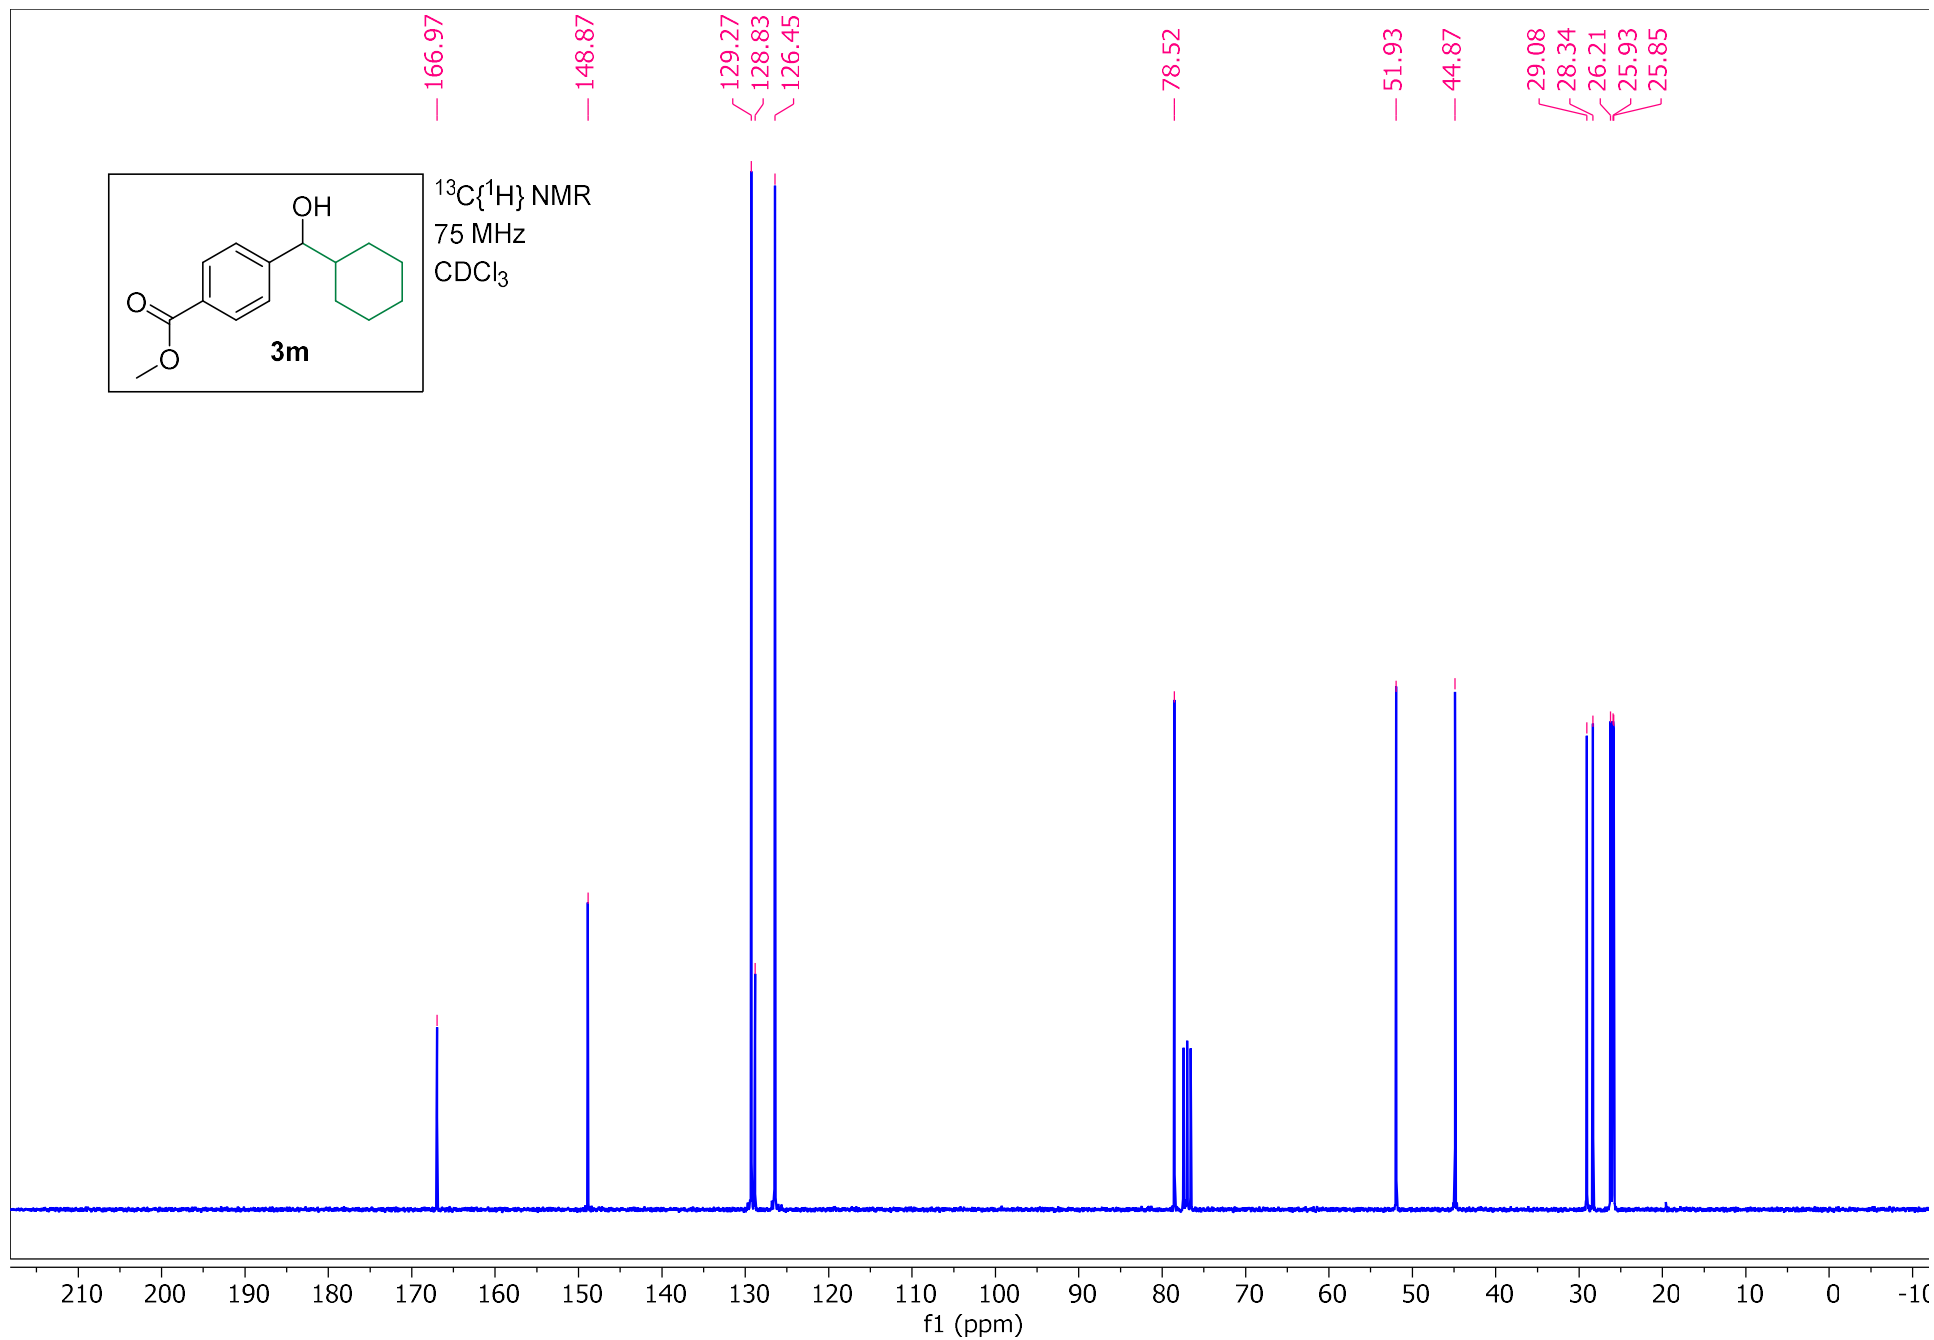

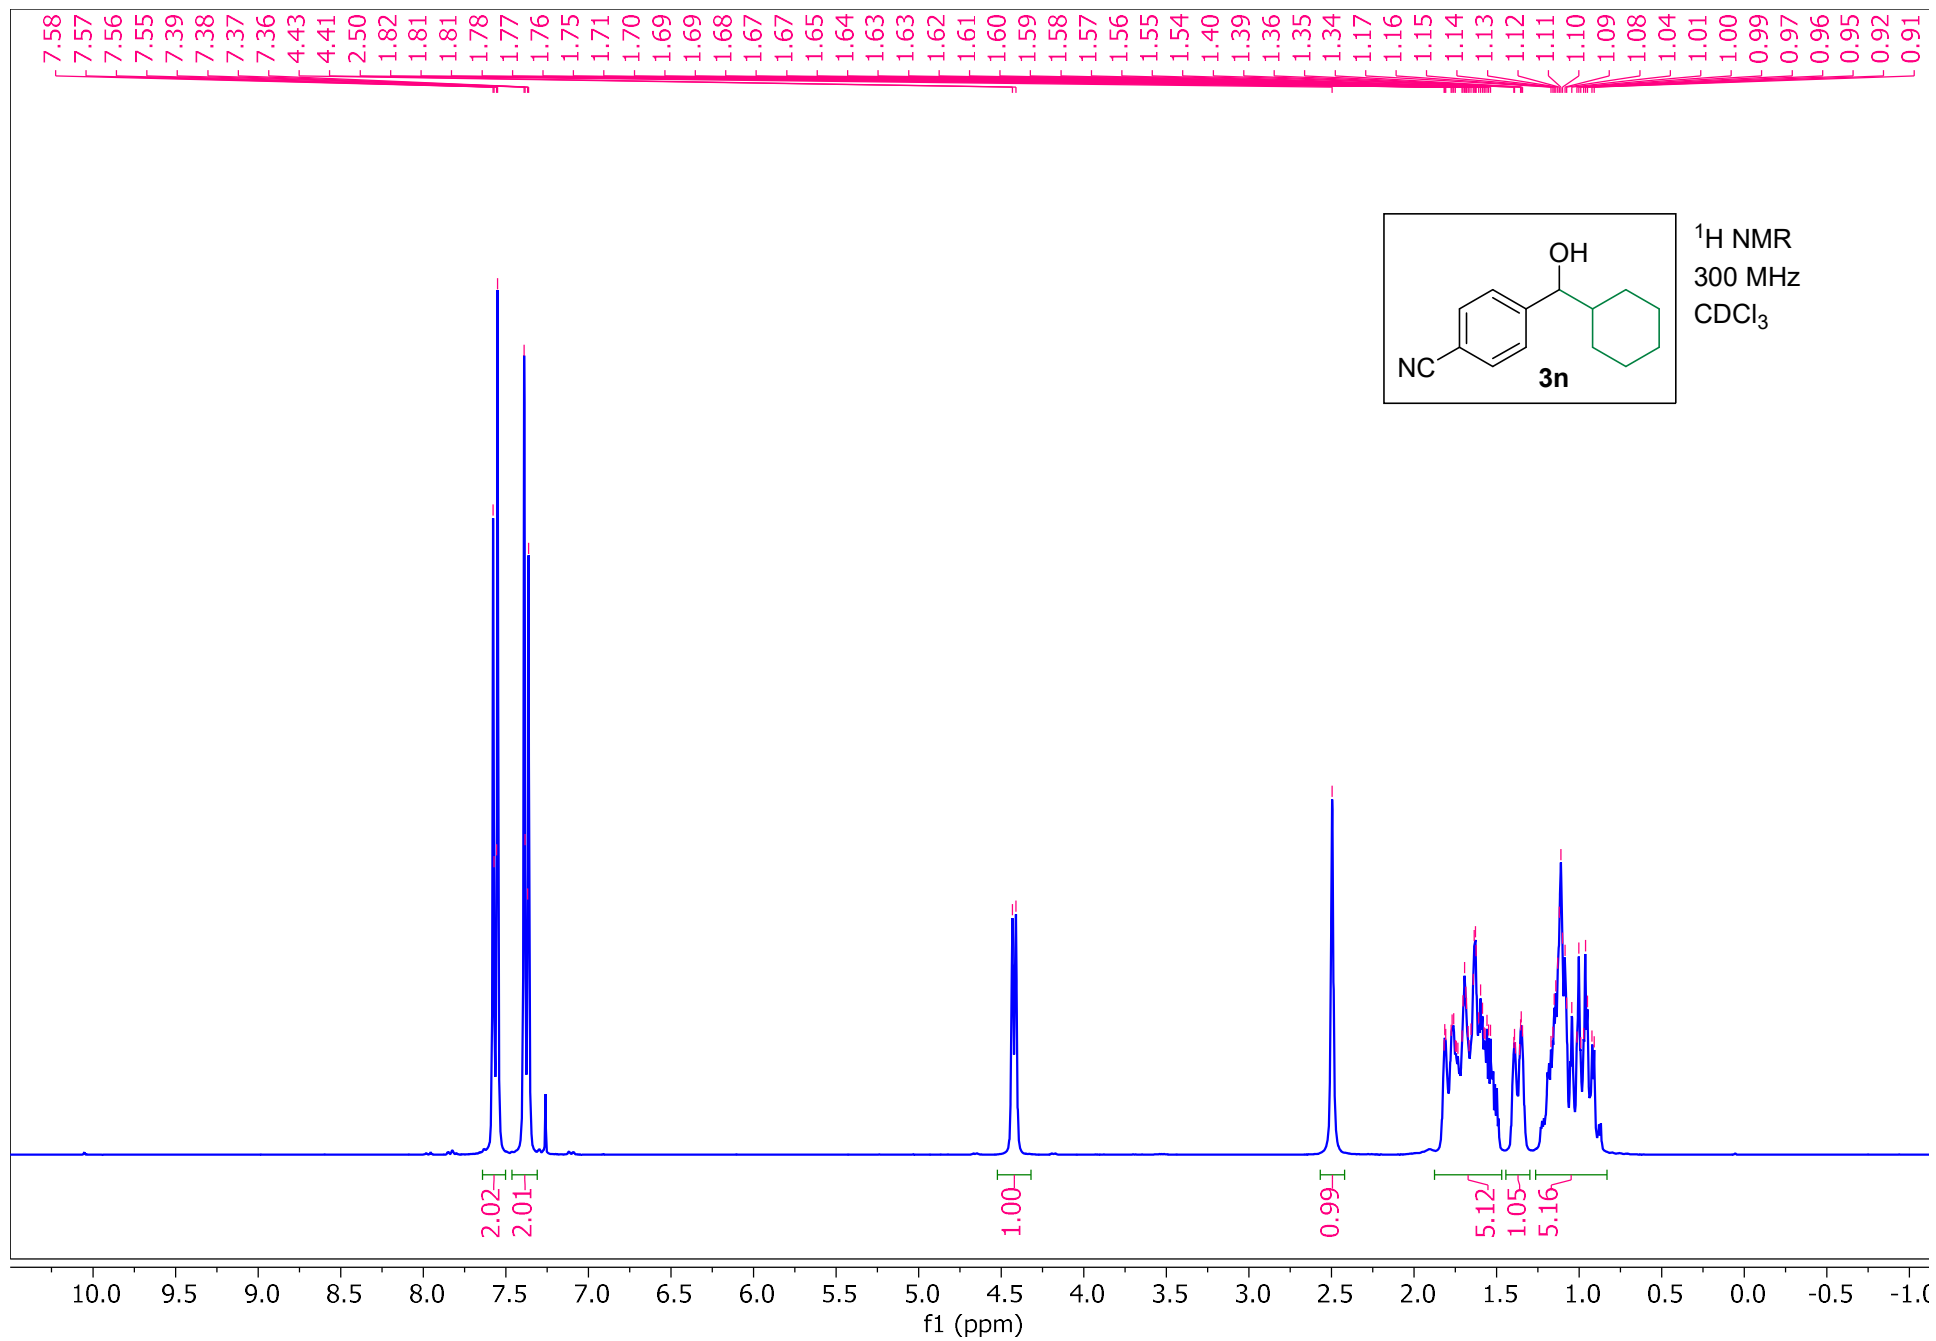

S92

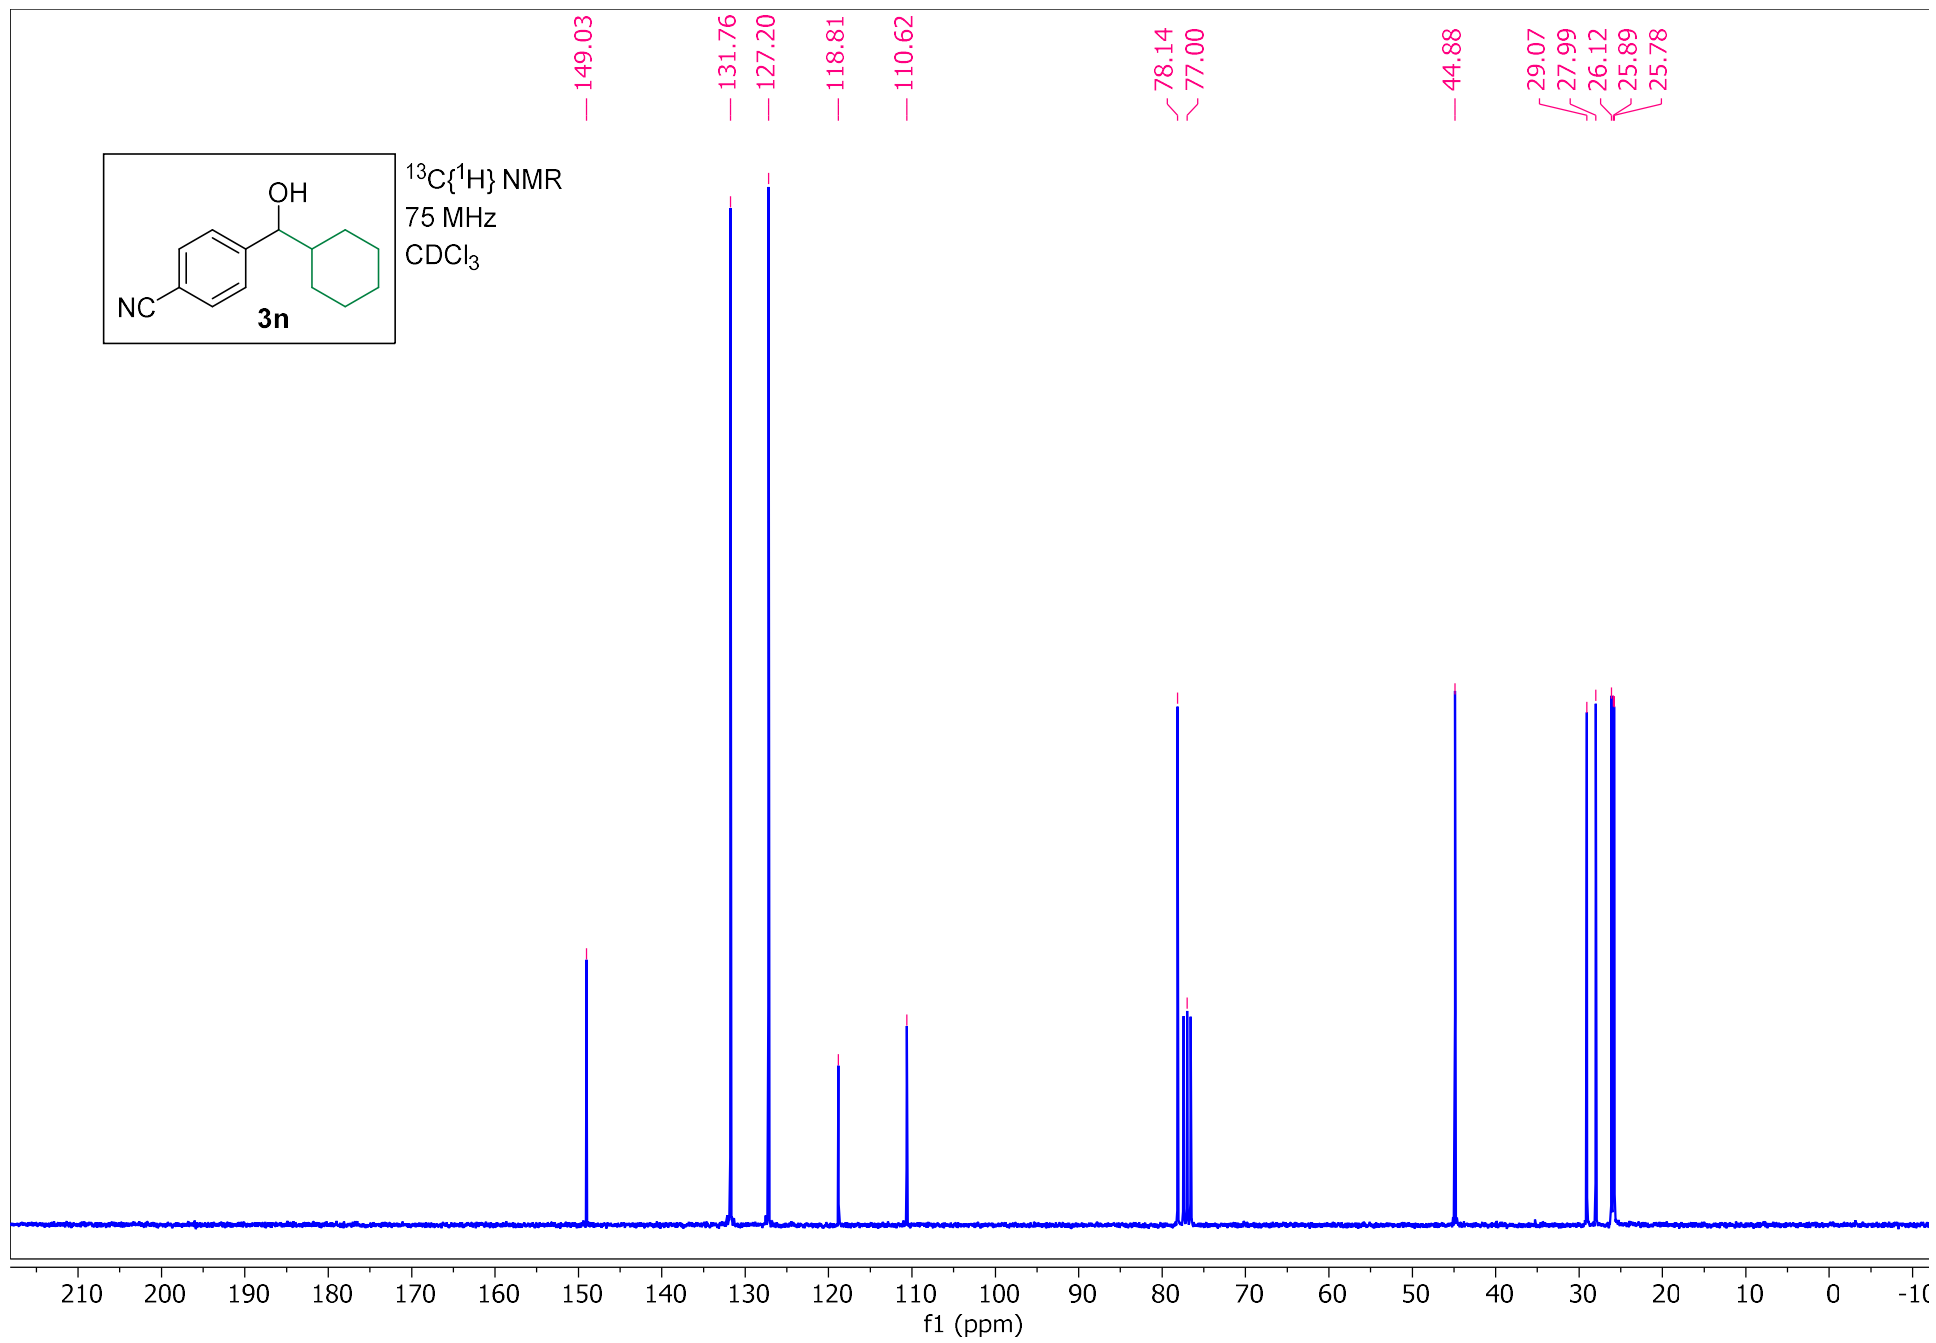

S93

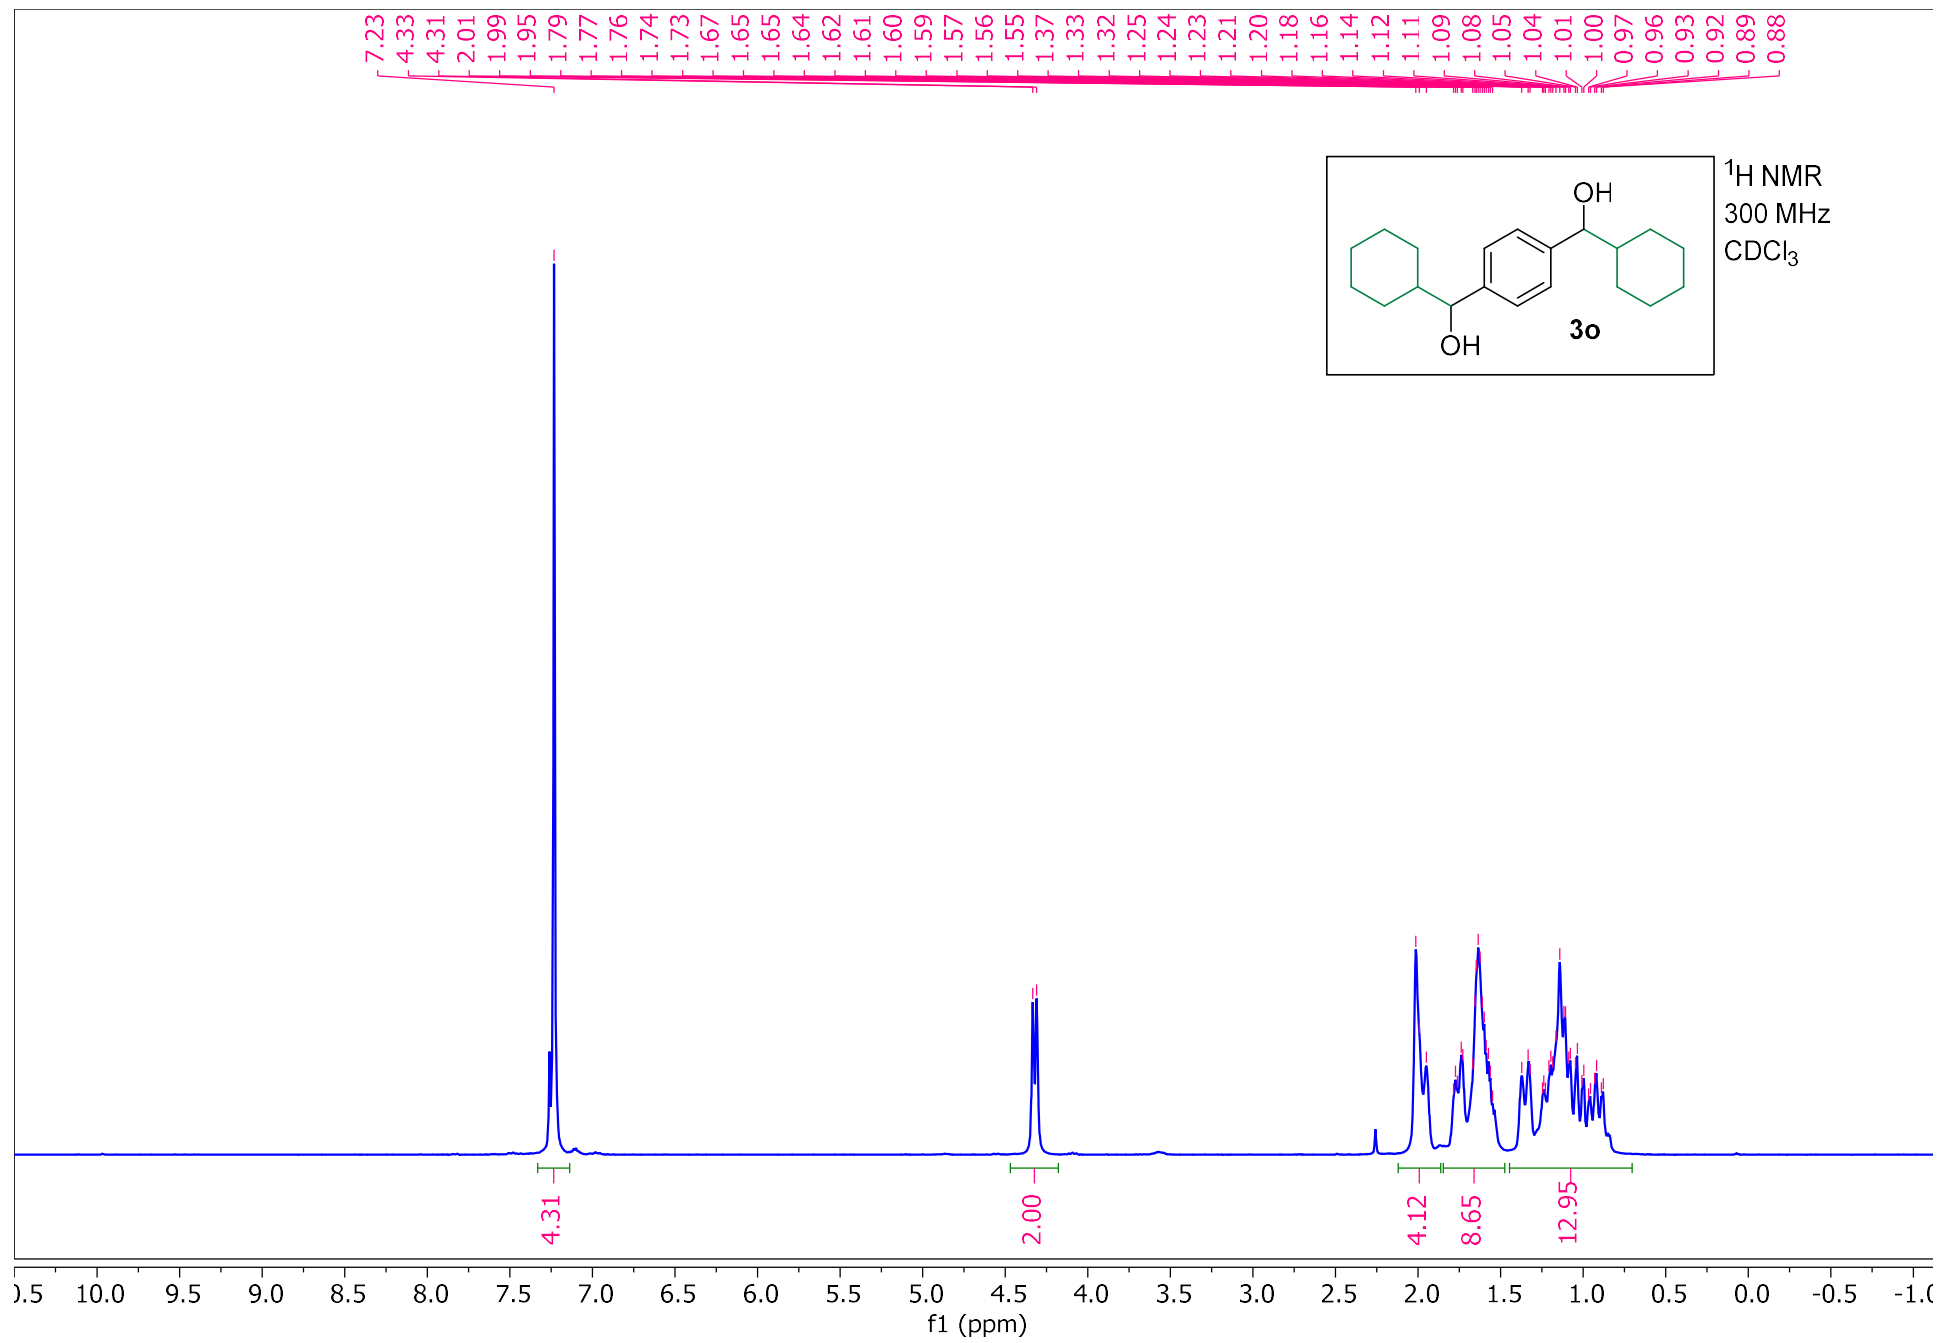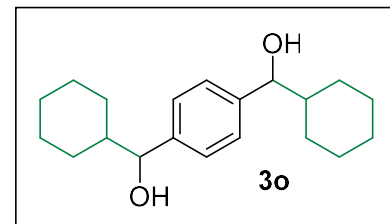

<sup>1</sup>H NMR  
300 MHz  
CDCl<sub>3</sub>

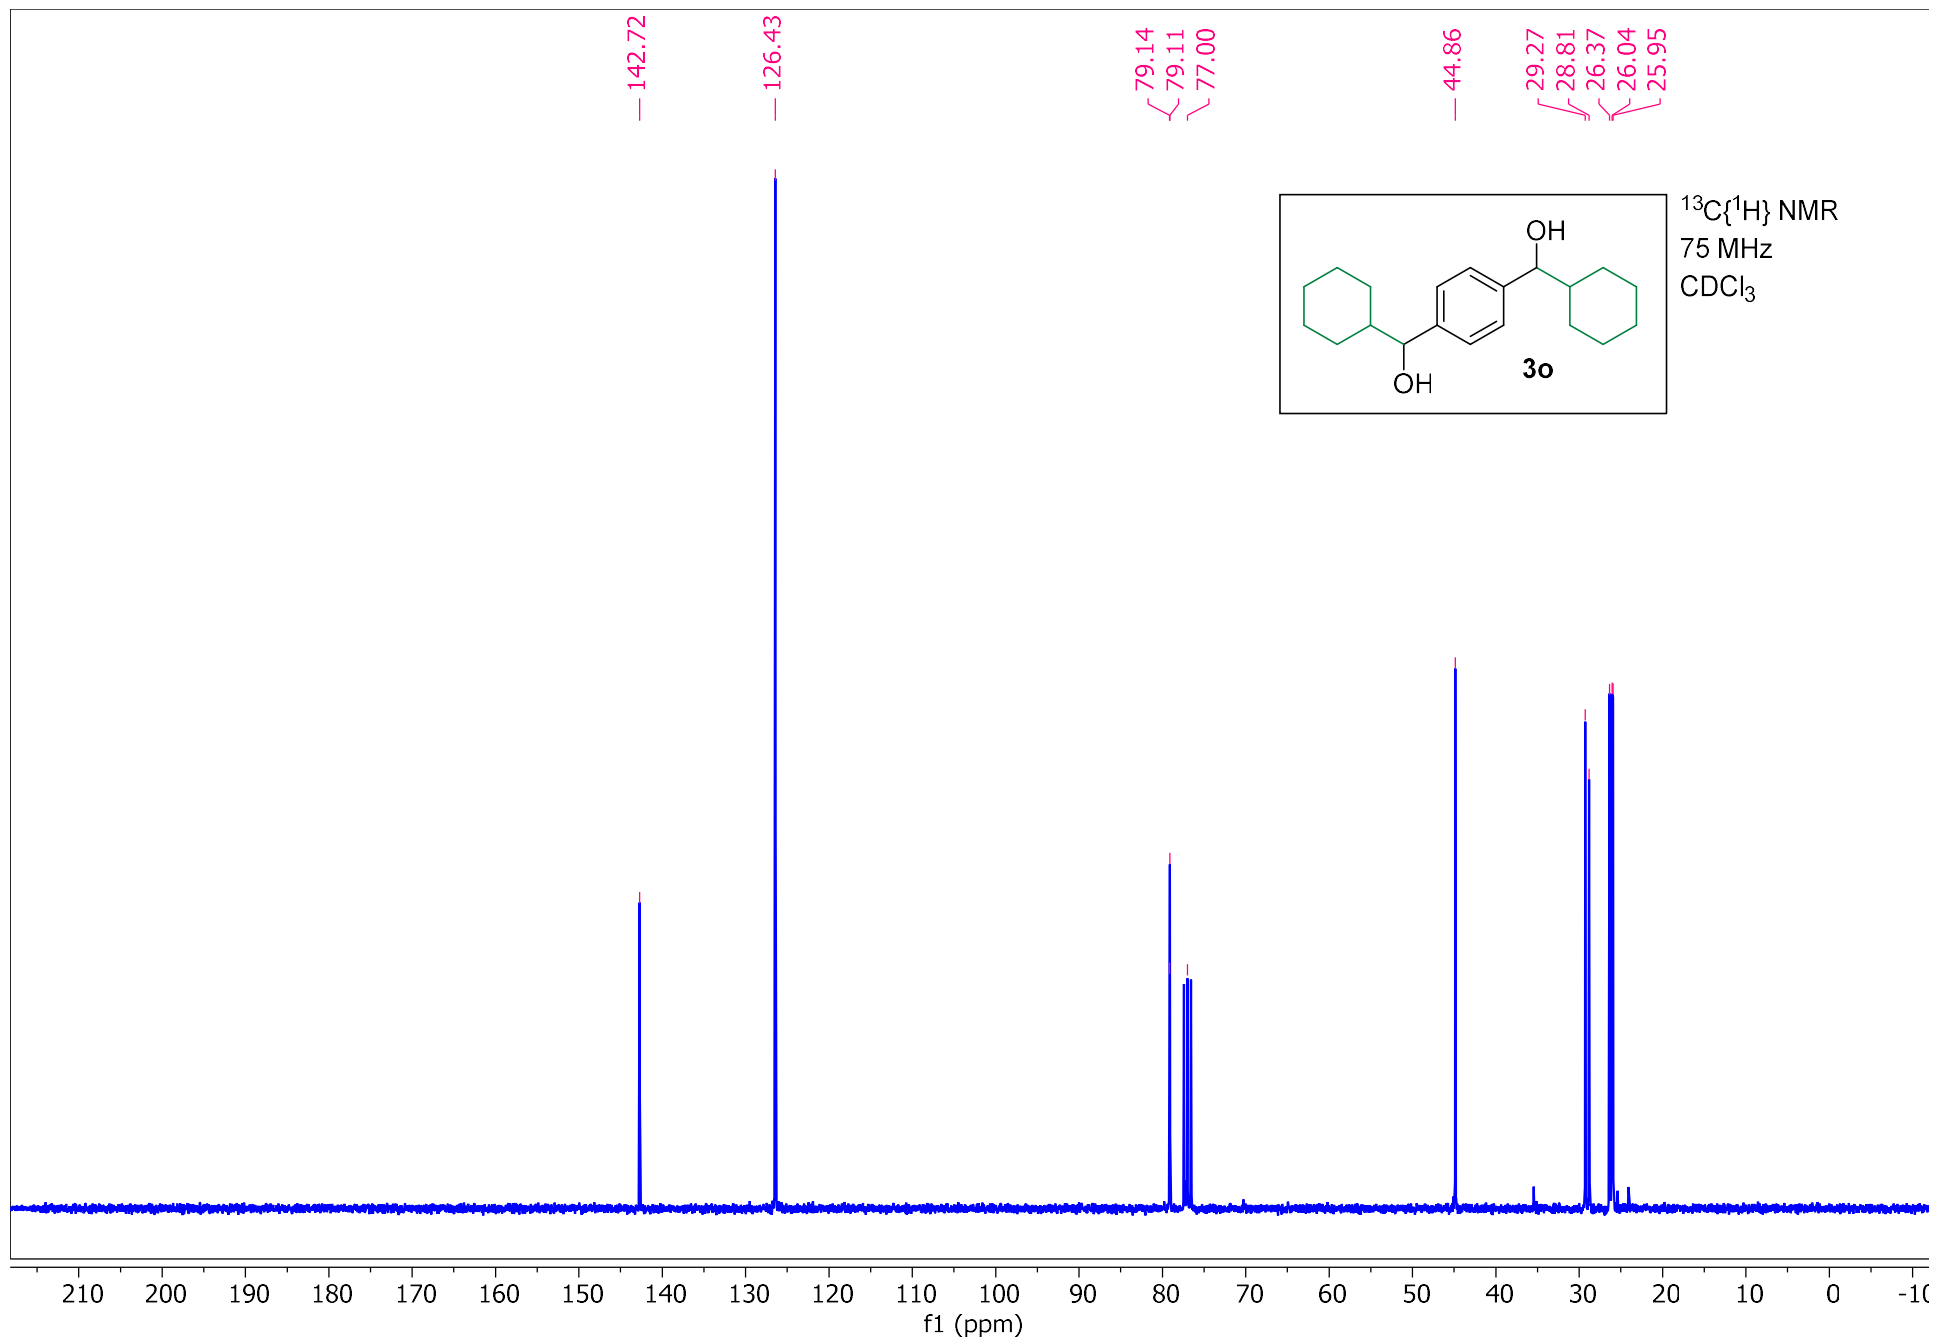

S95

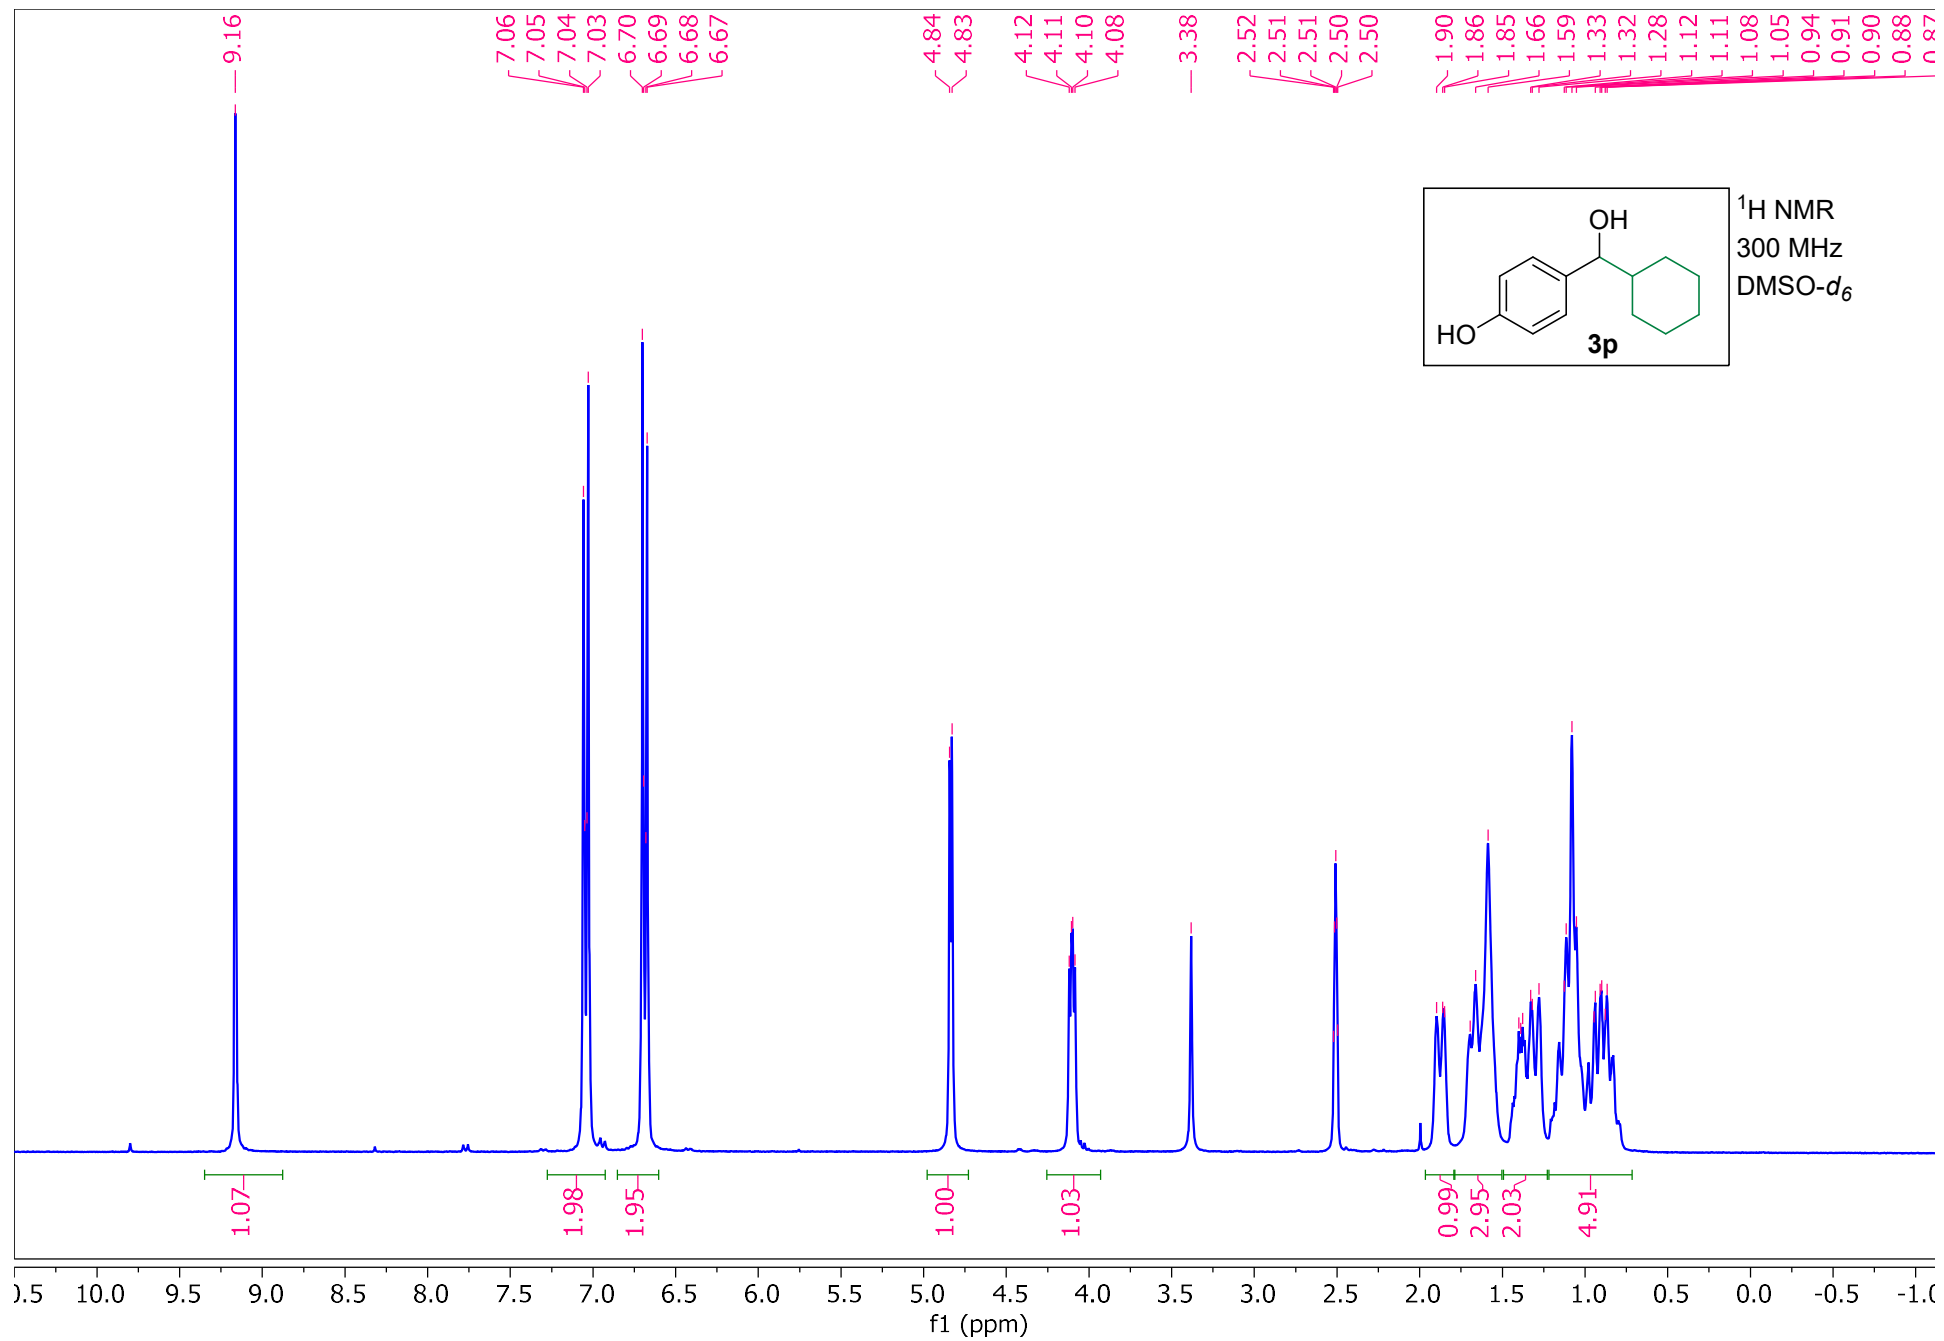



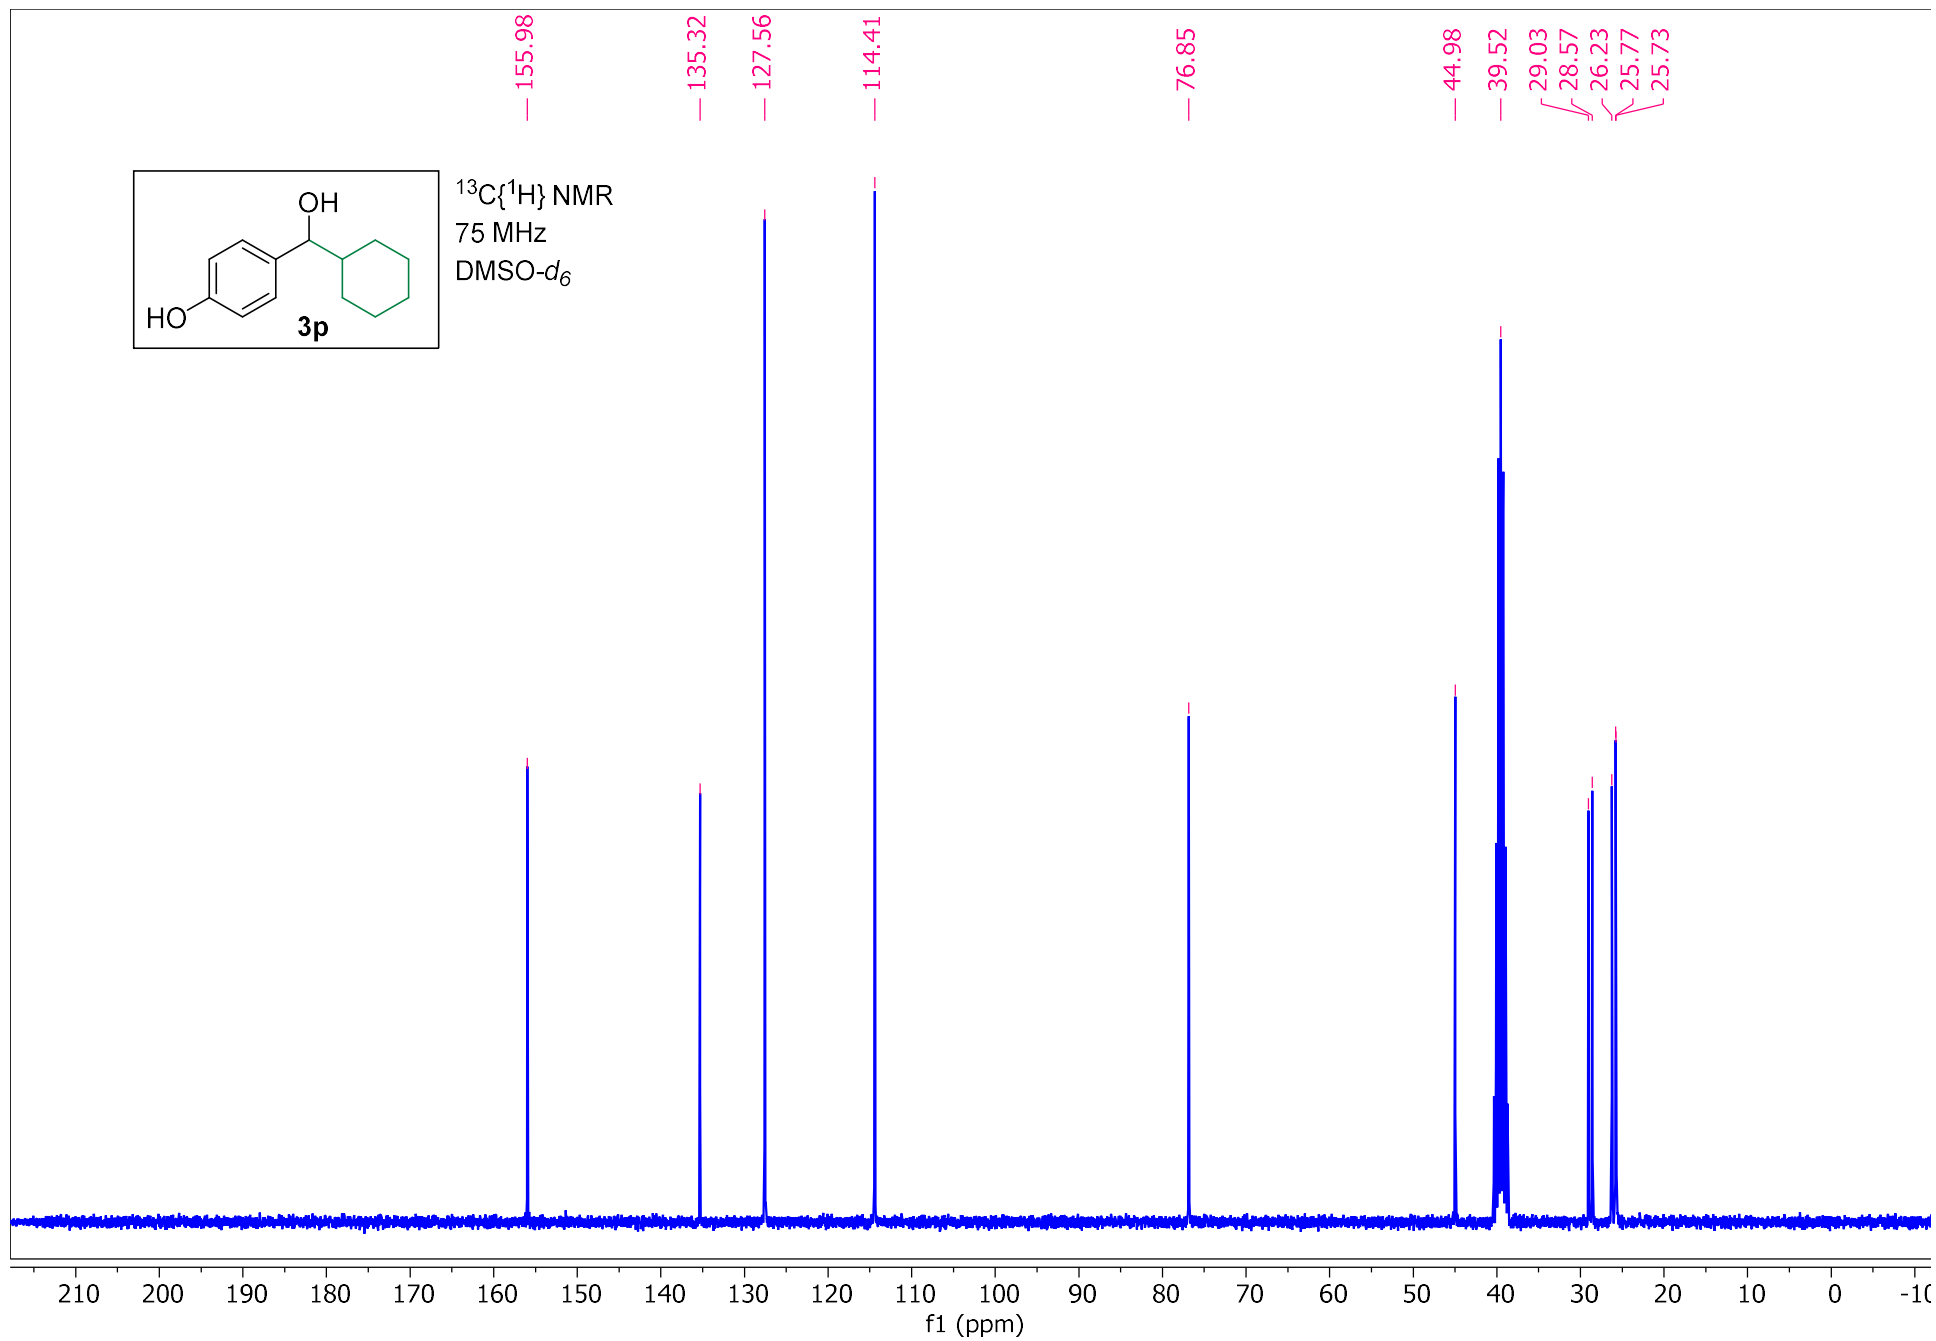

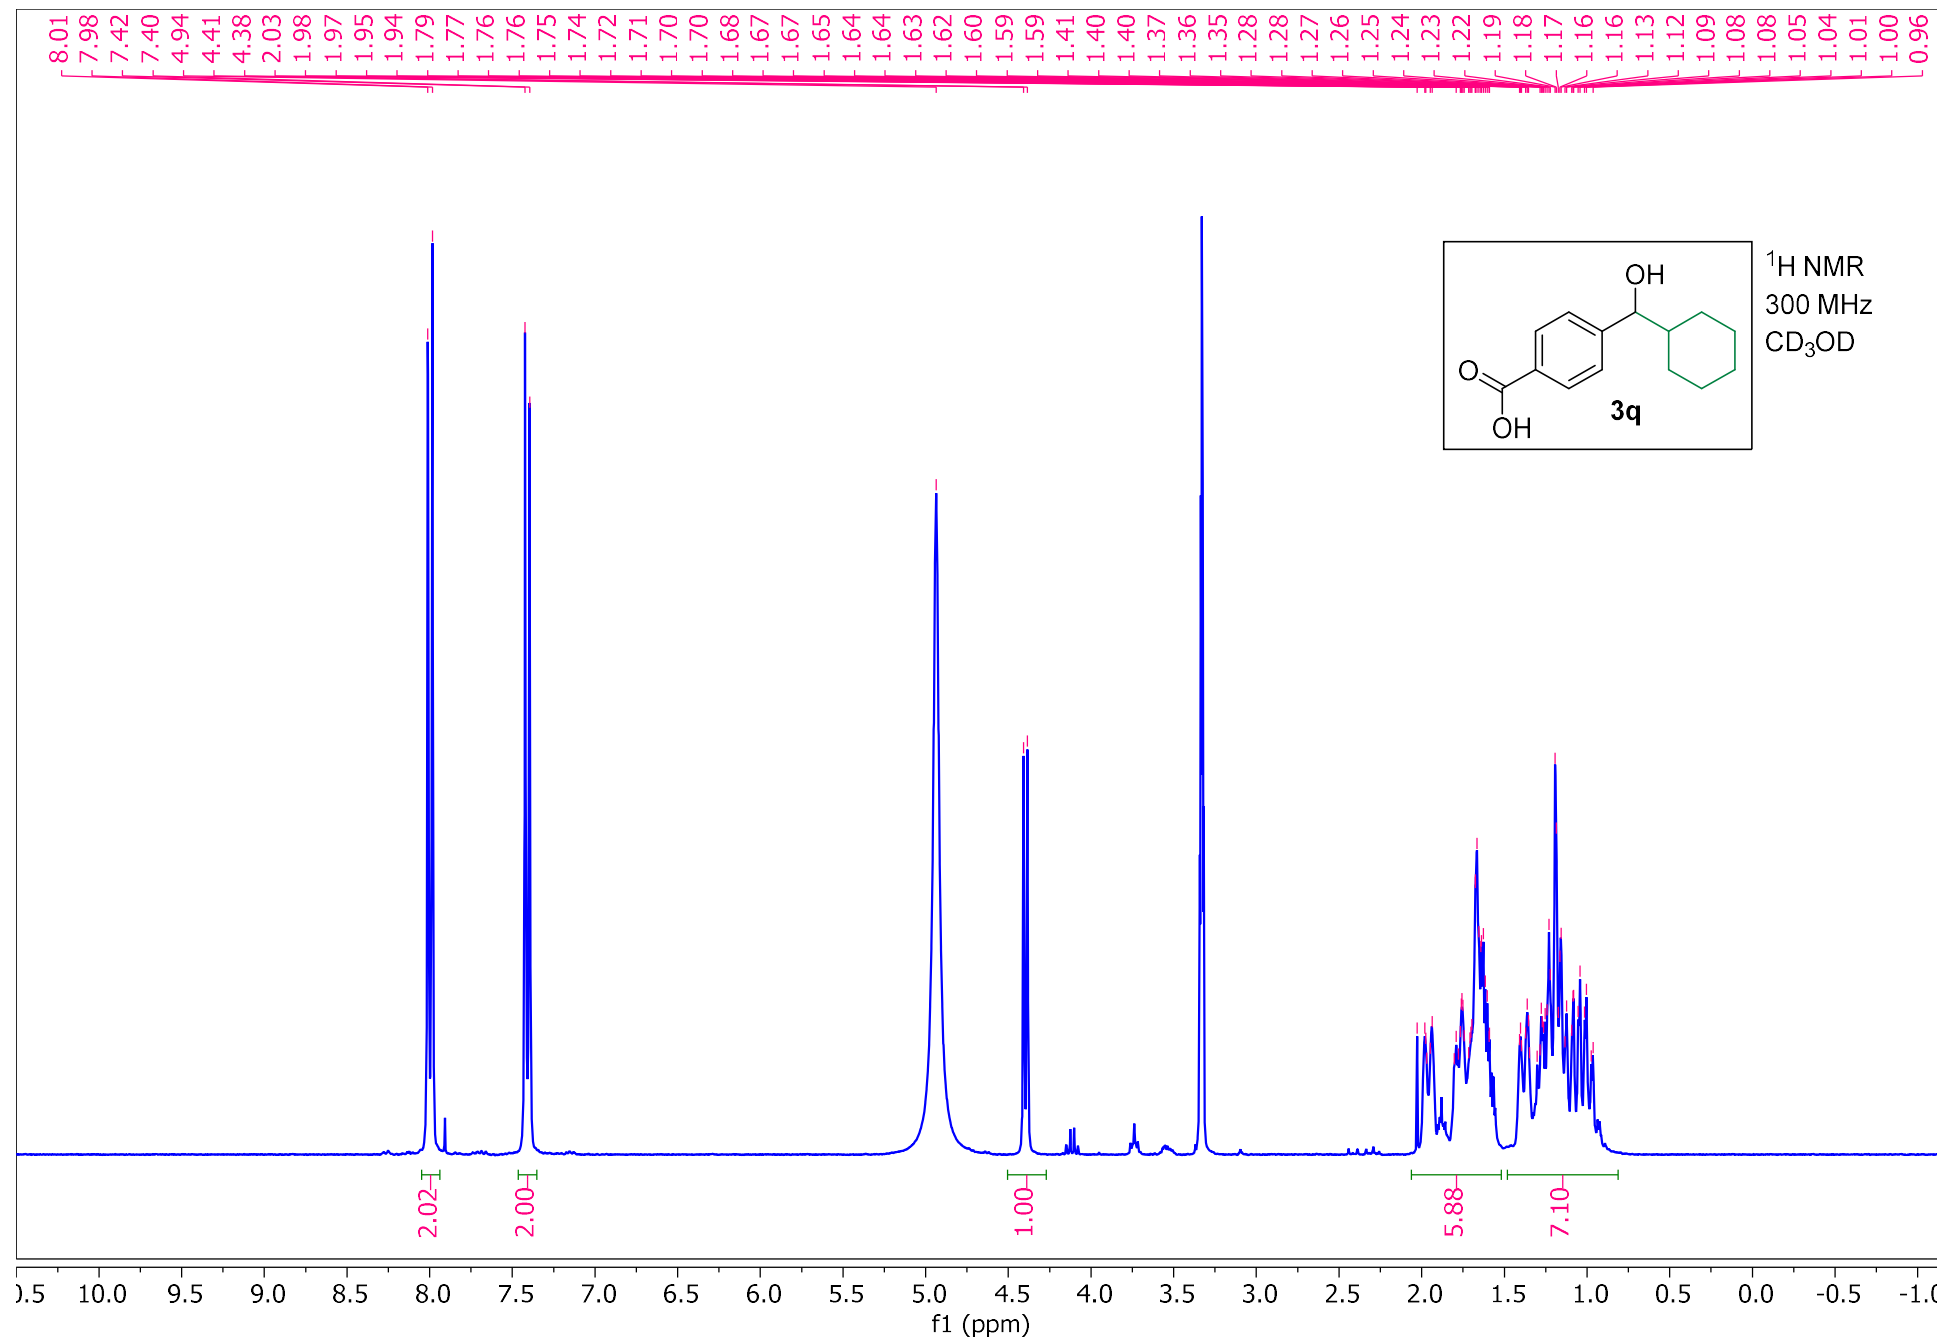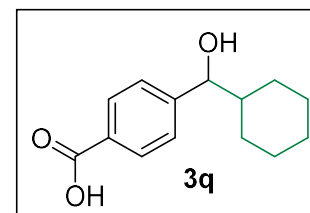

<sup>1</sup>H NMR  
300 MHz  
CD<sub>3</sub>OD

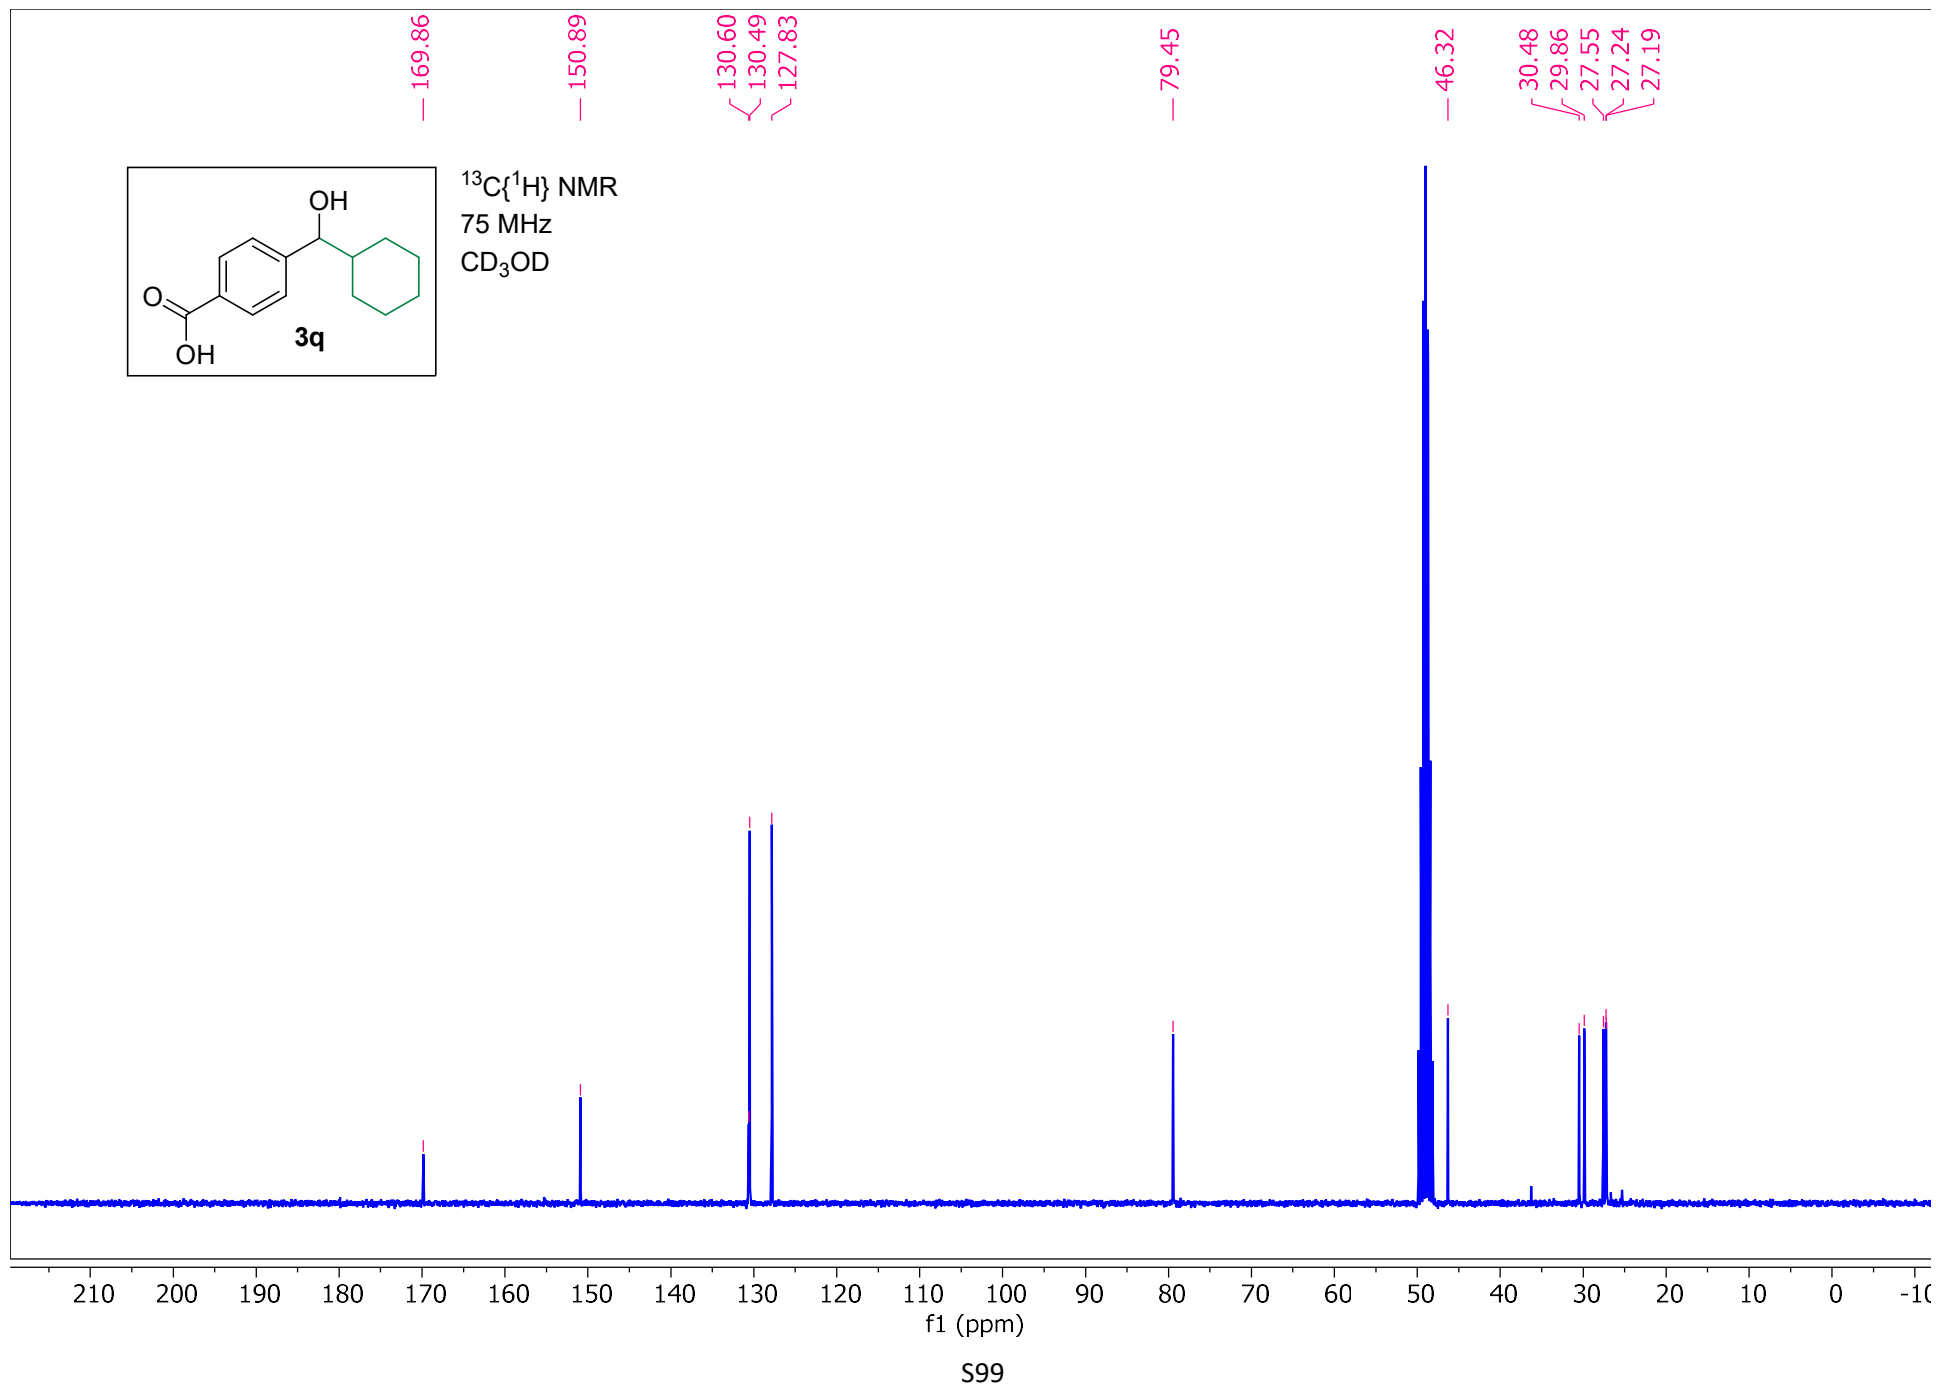

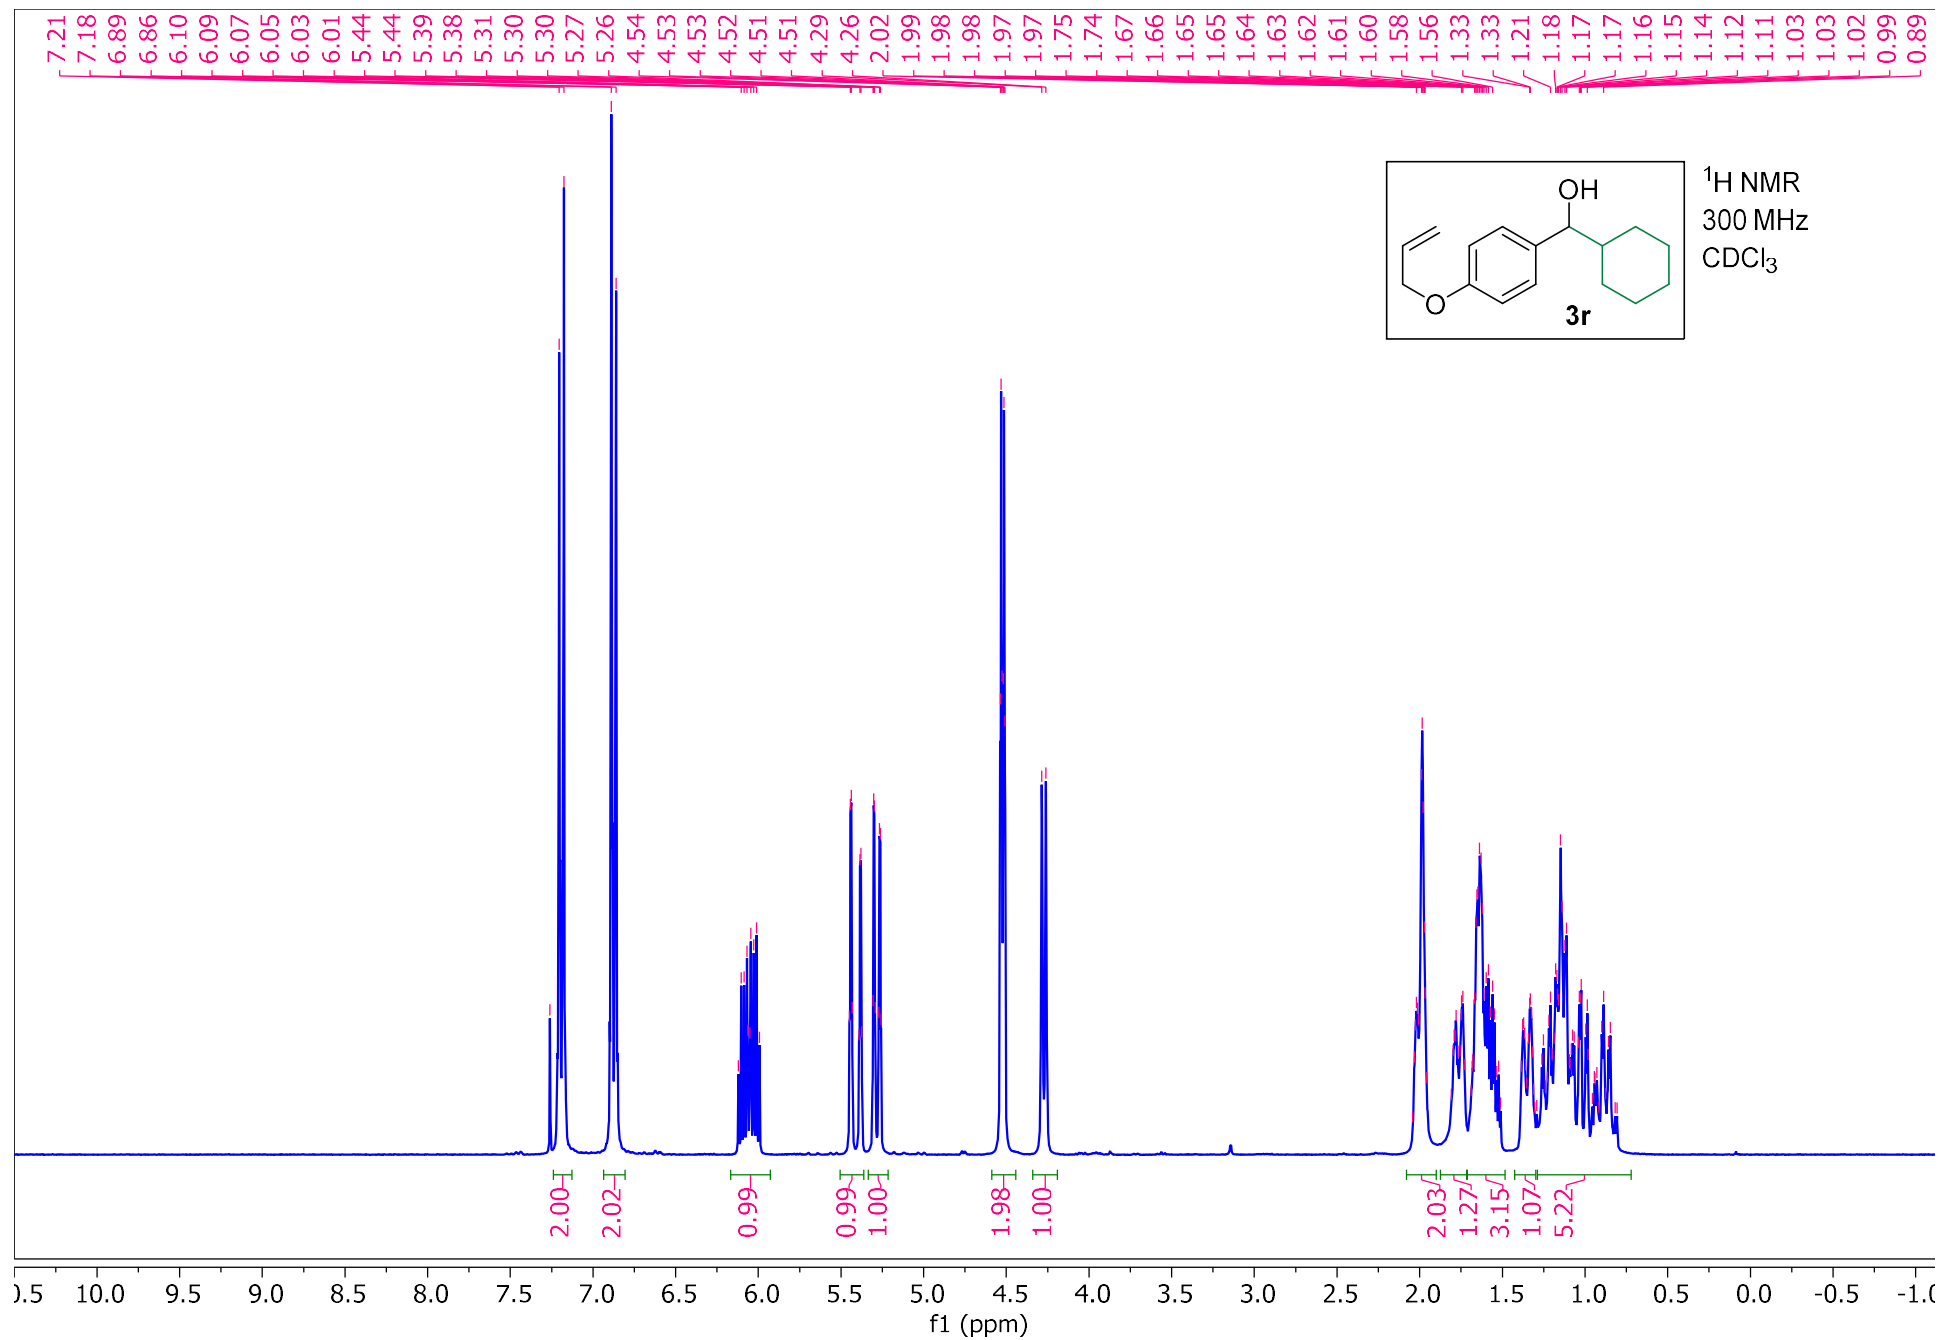

S100

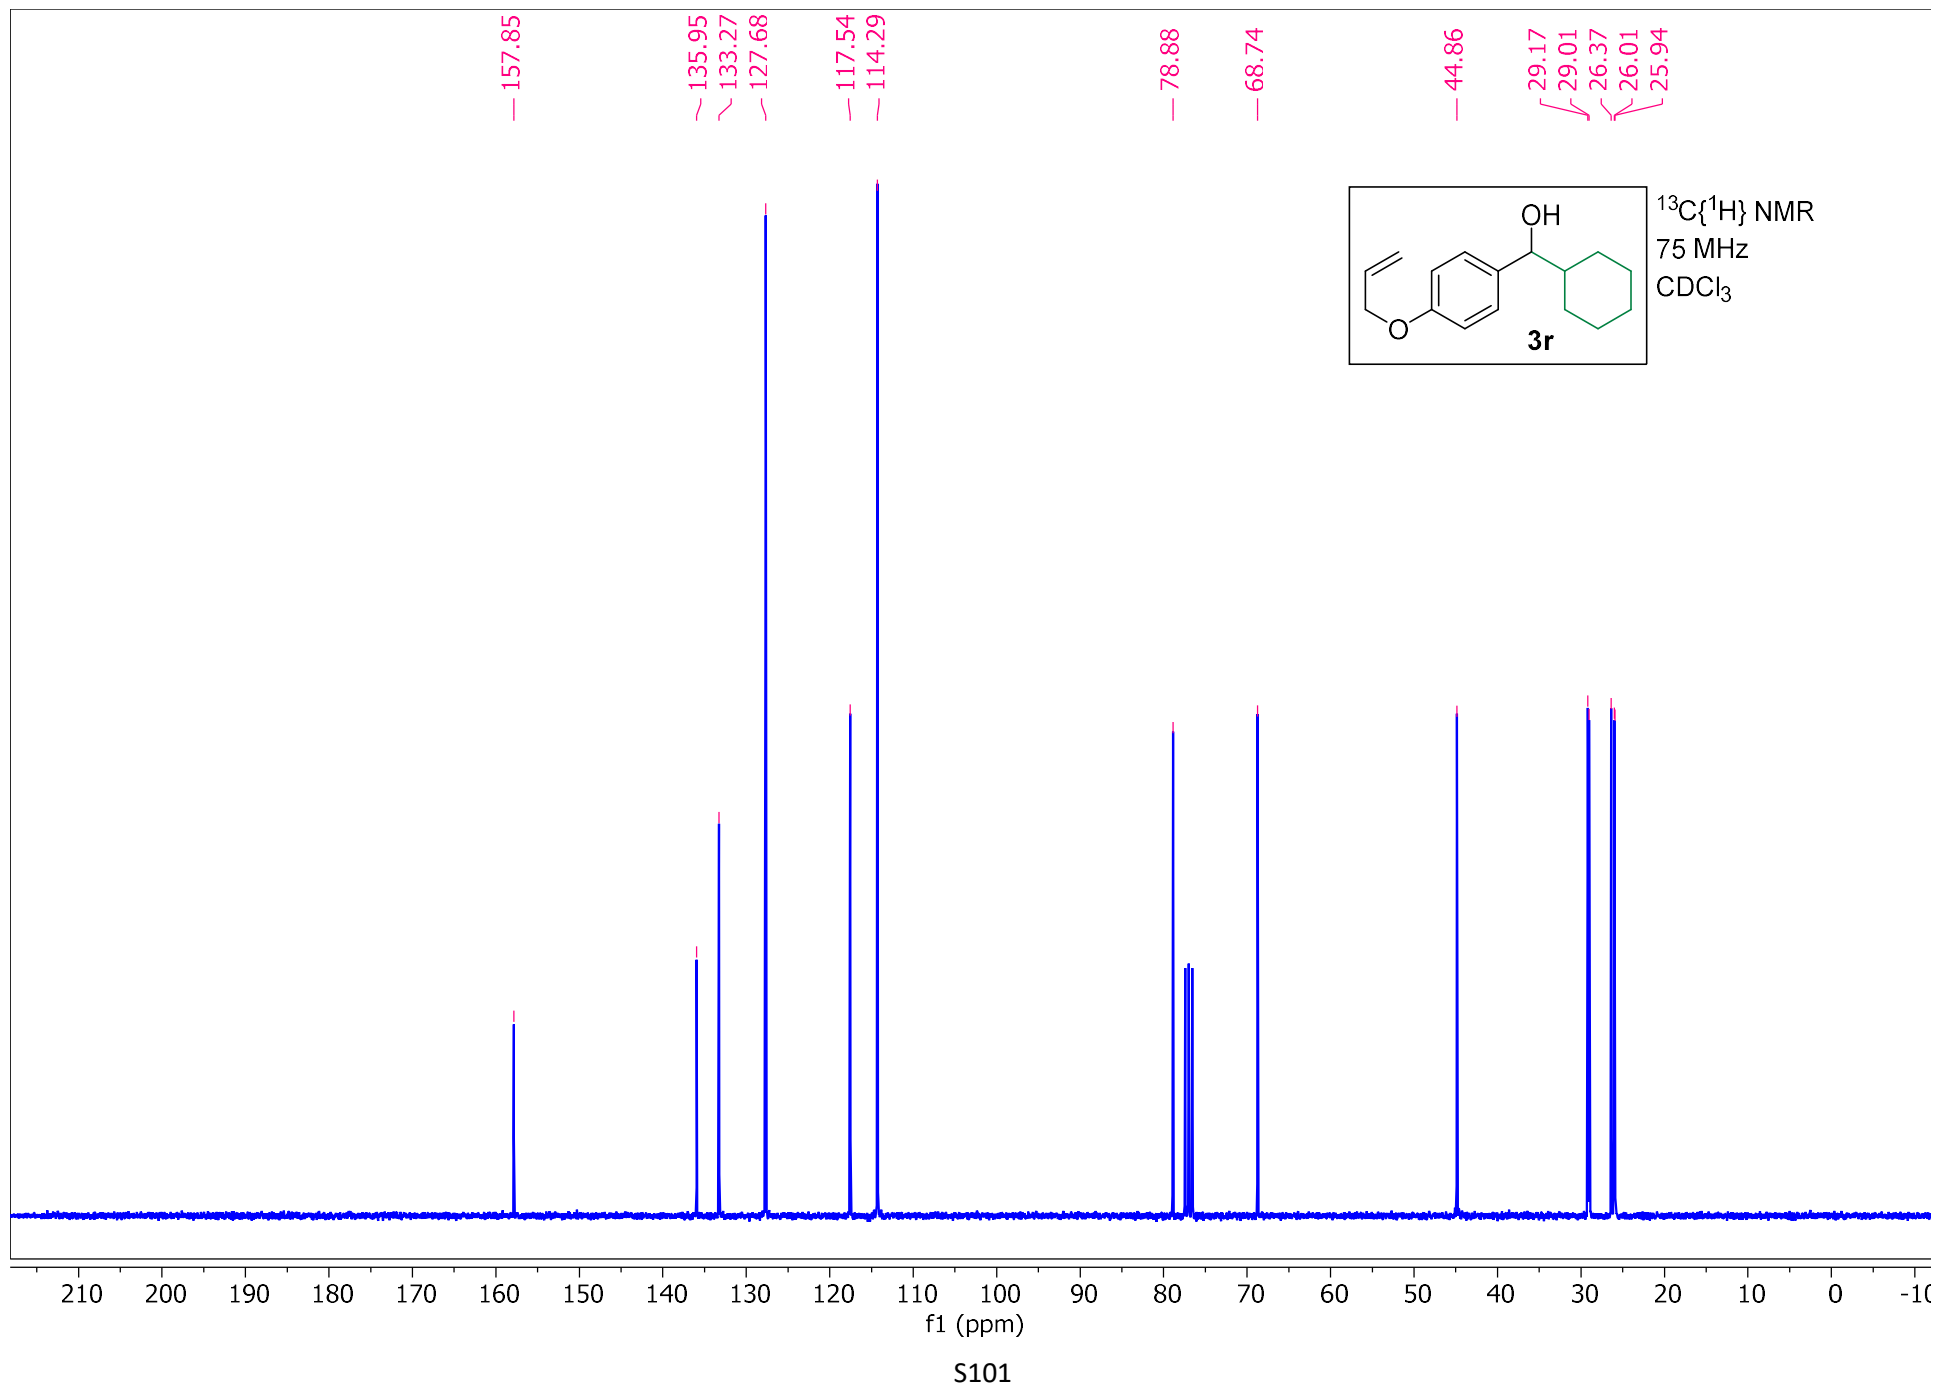

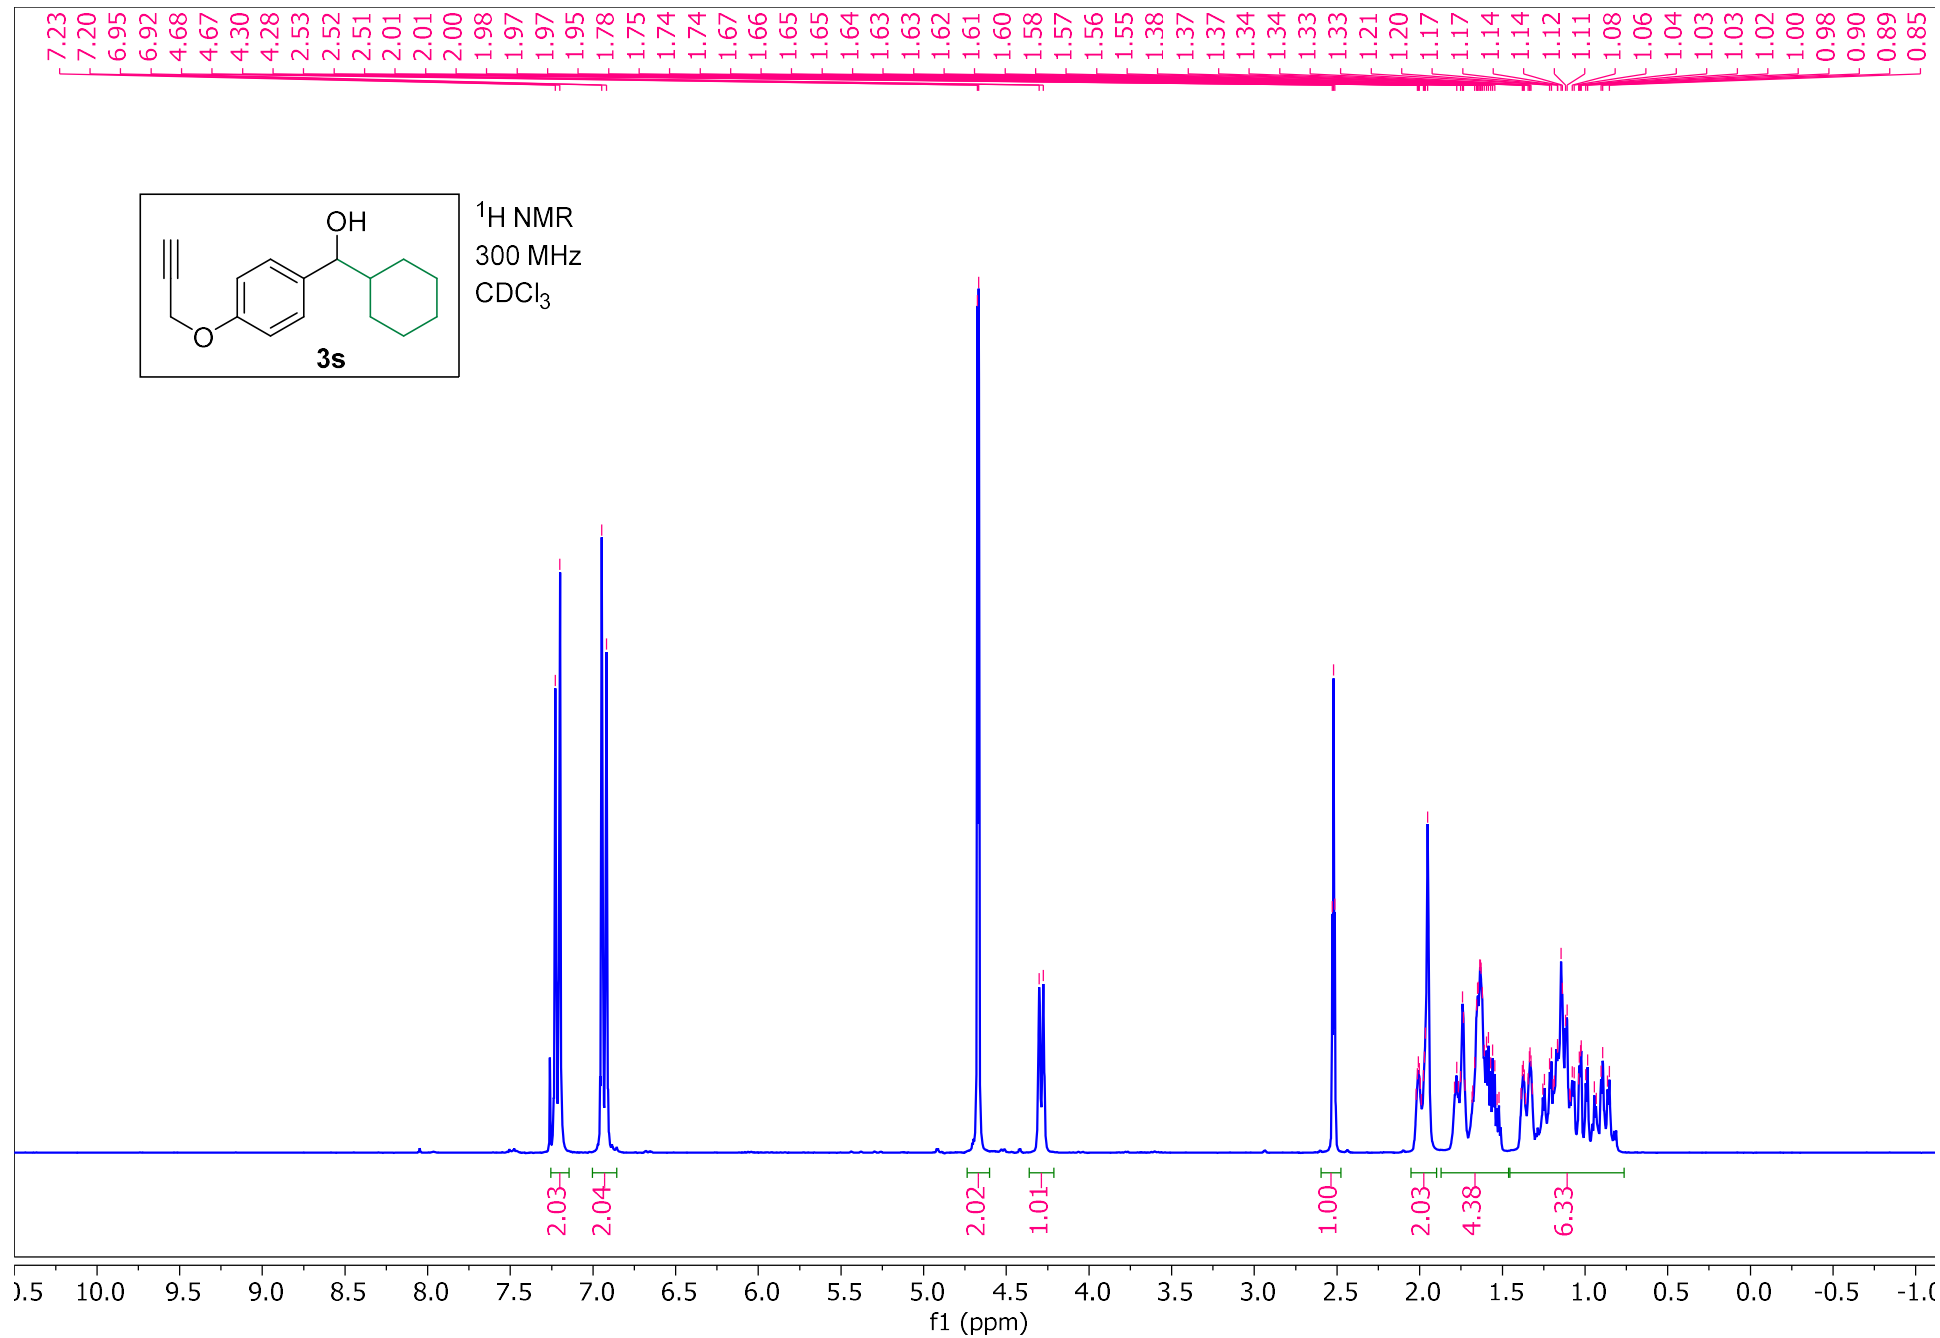

S102

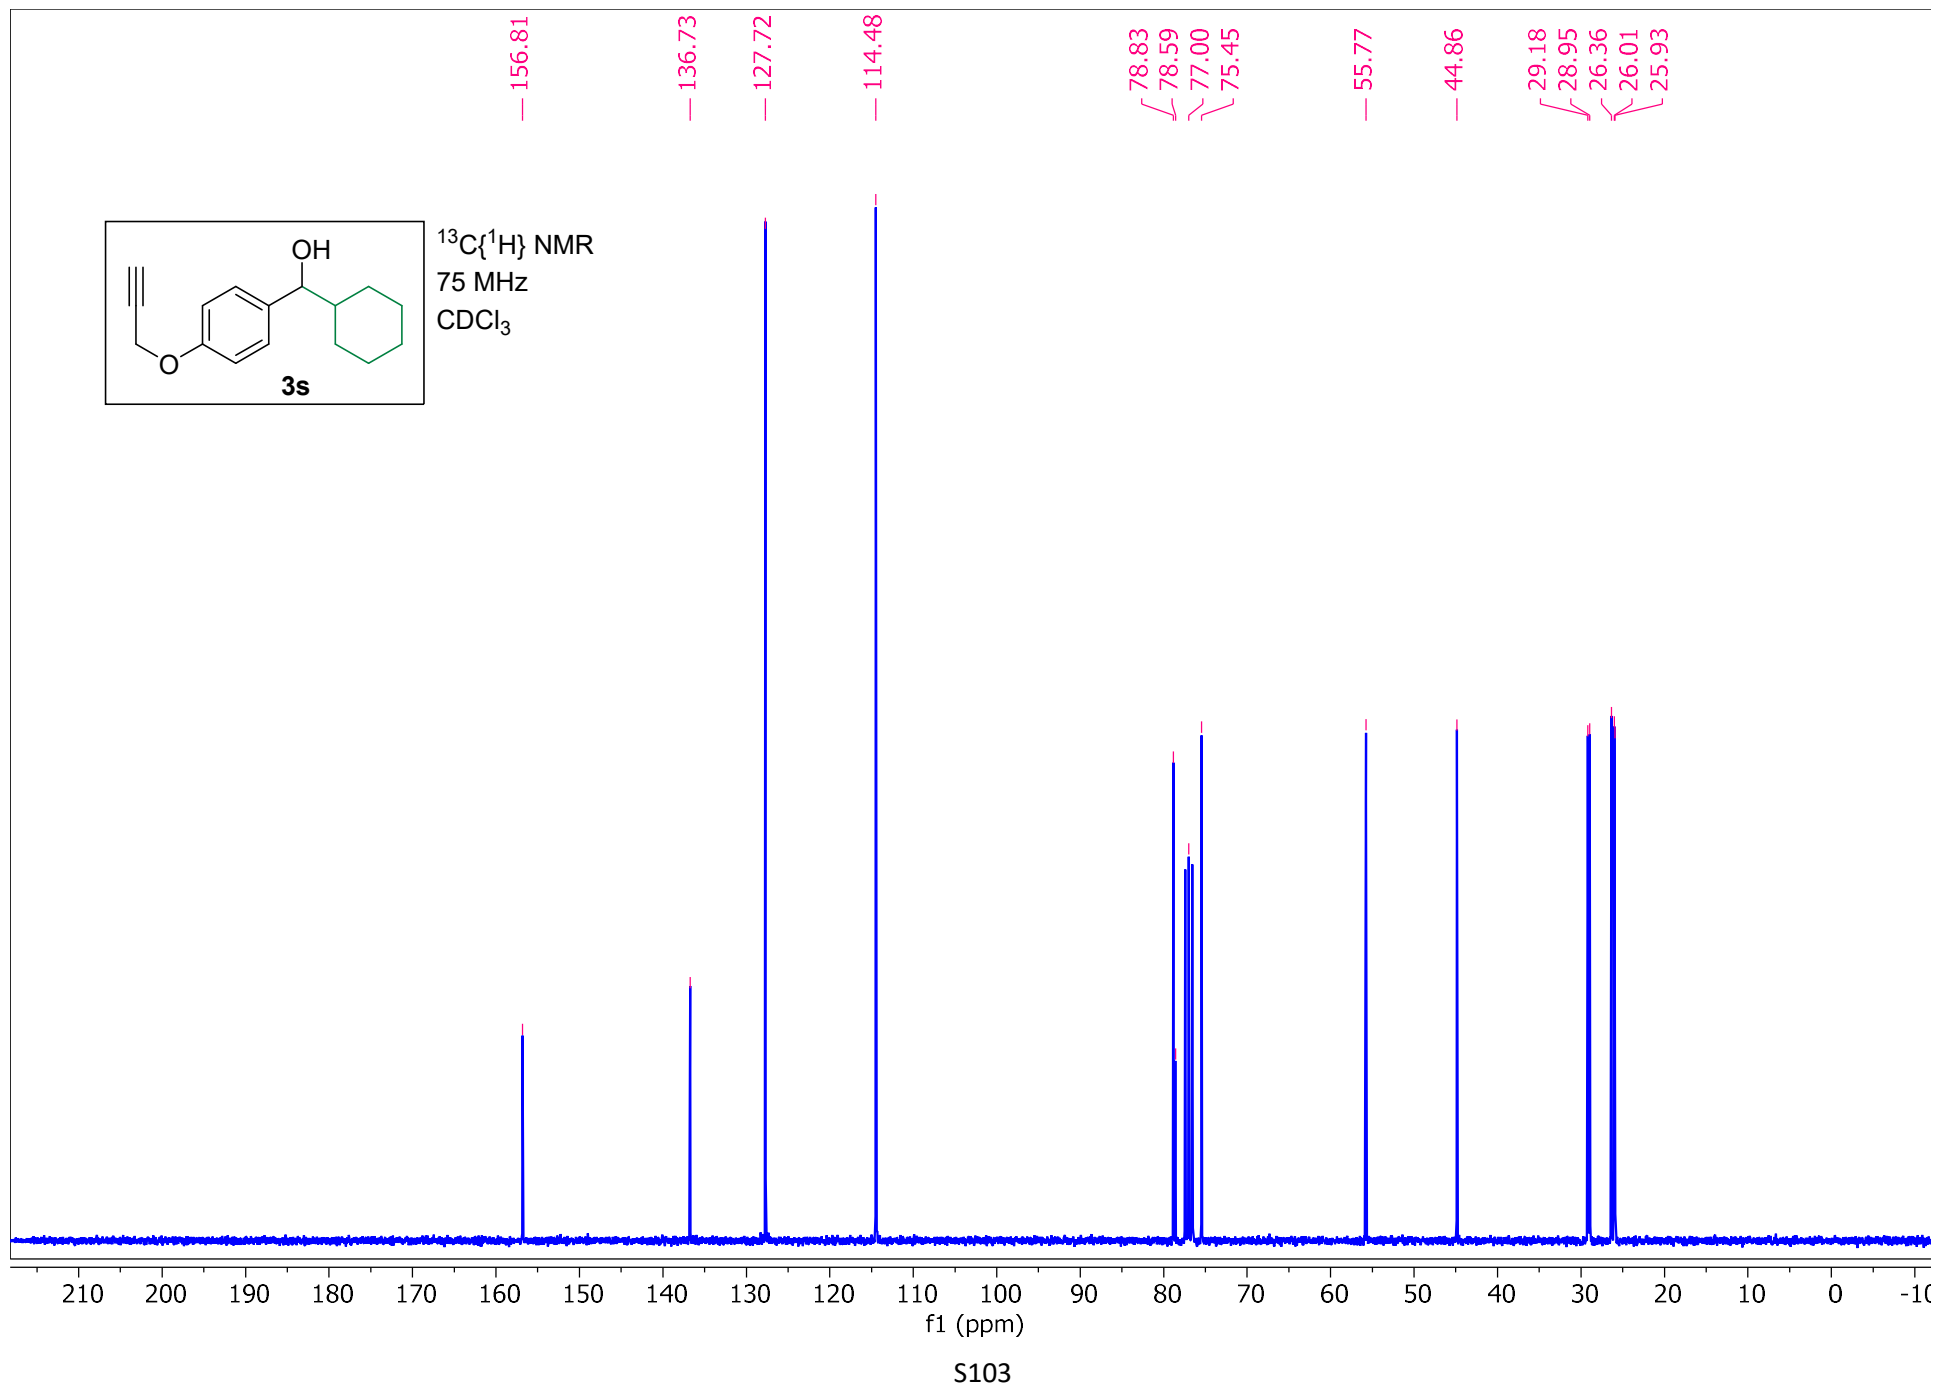

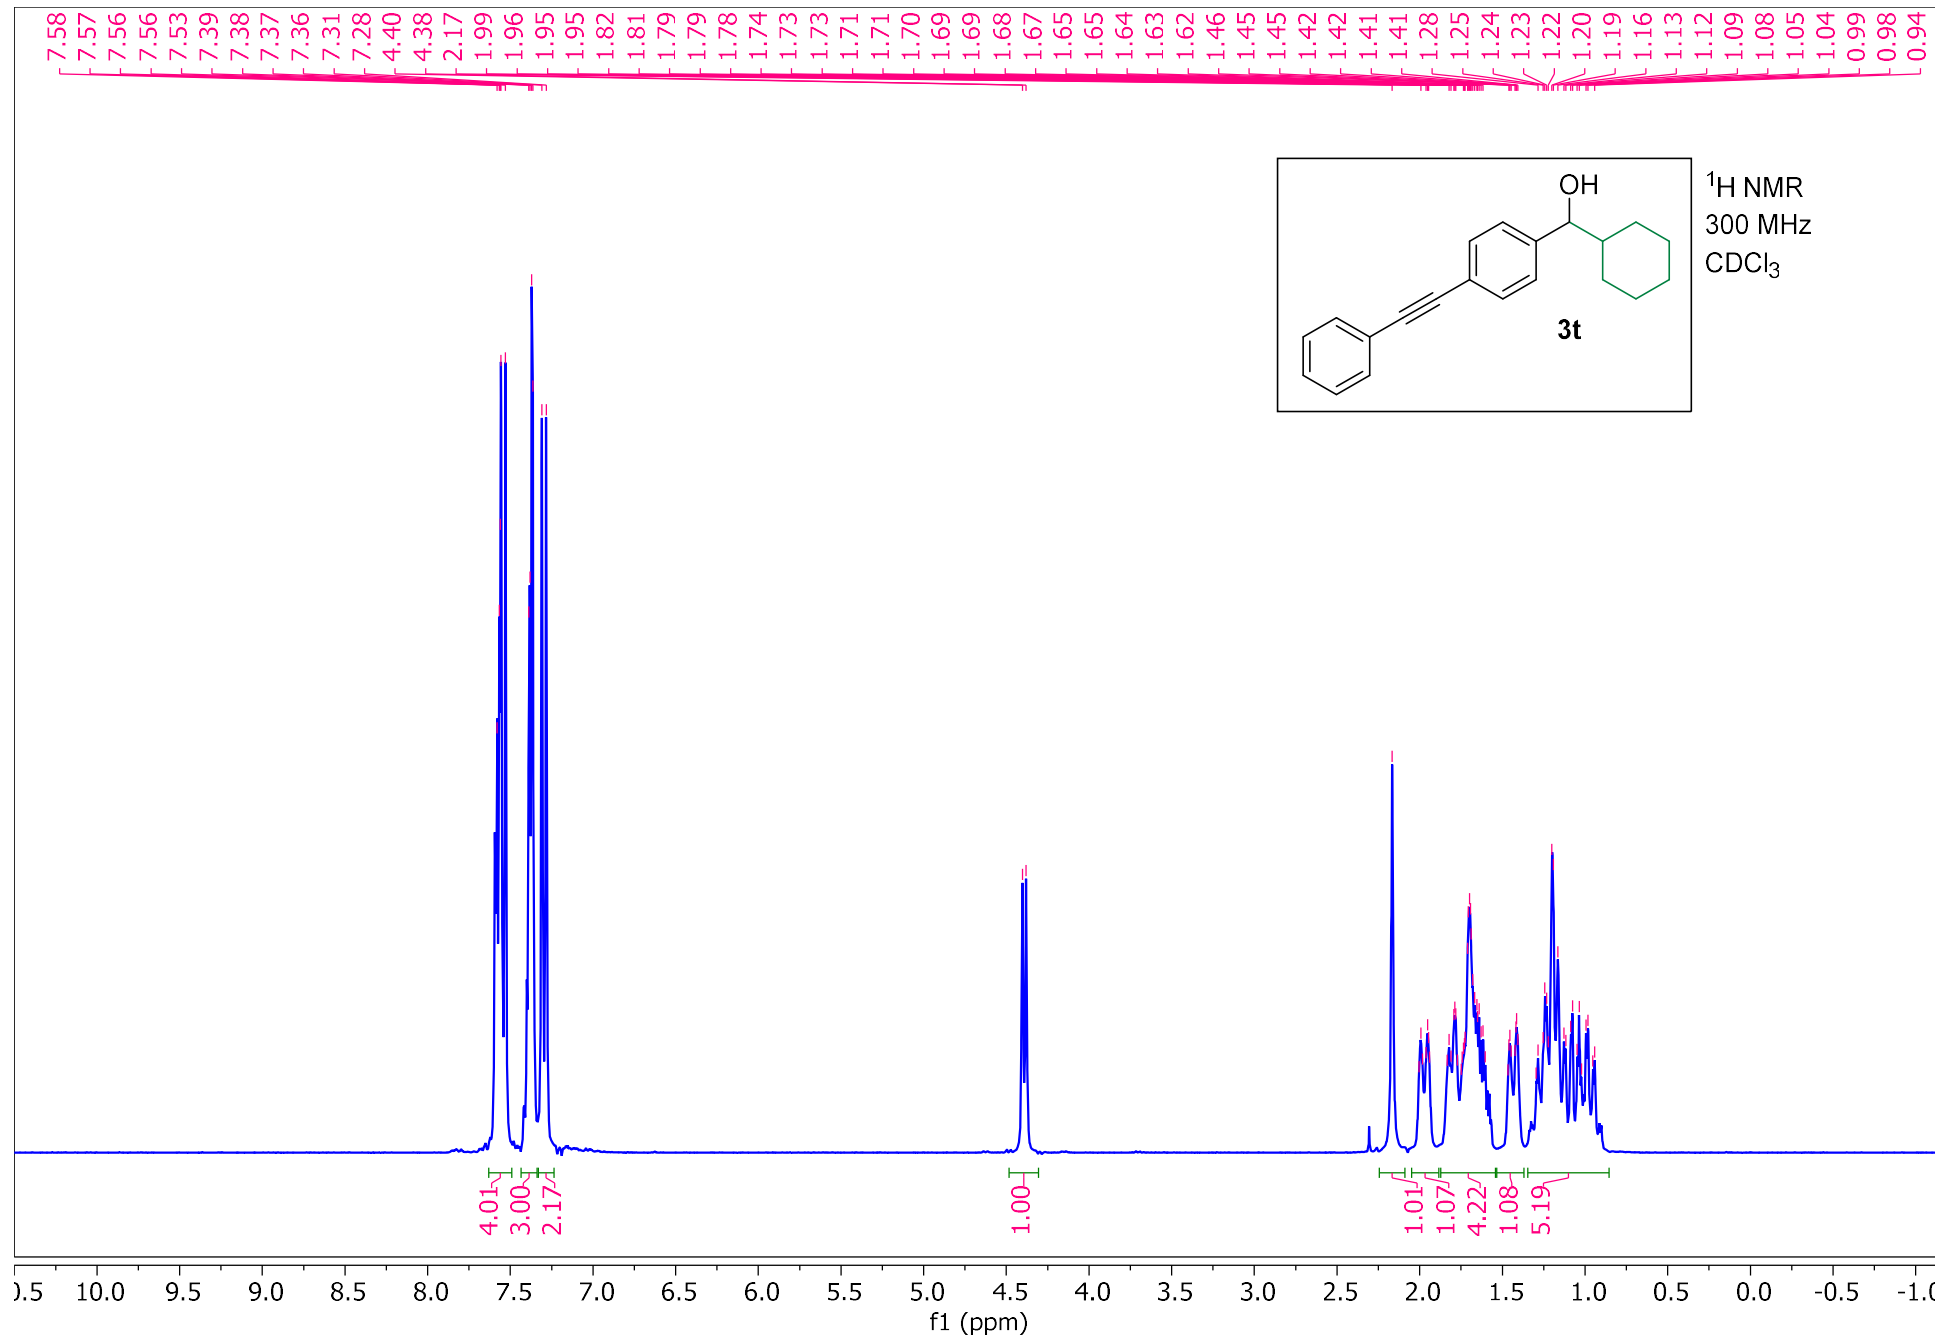

S104



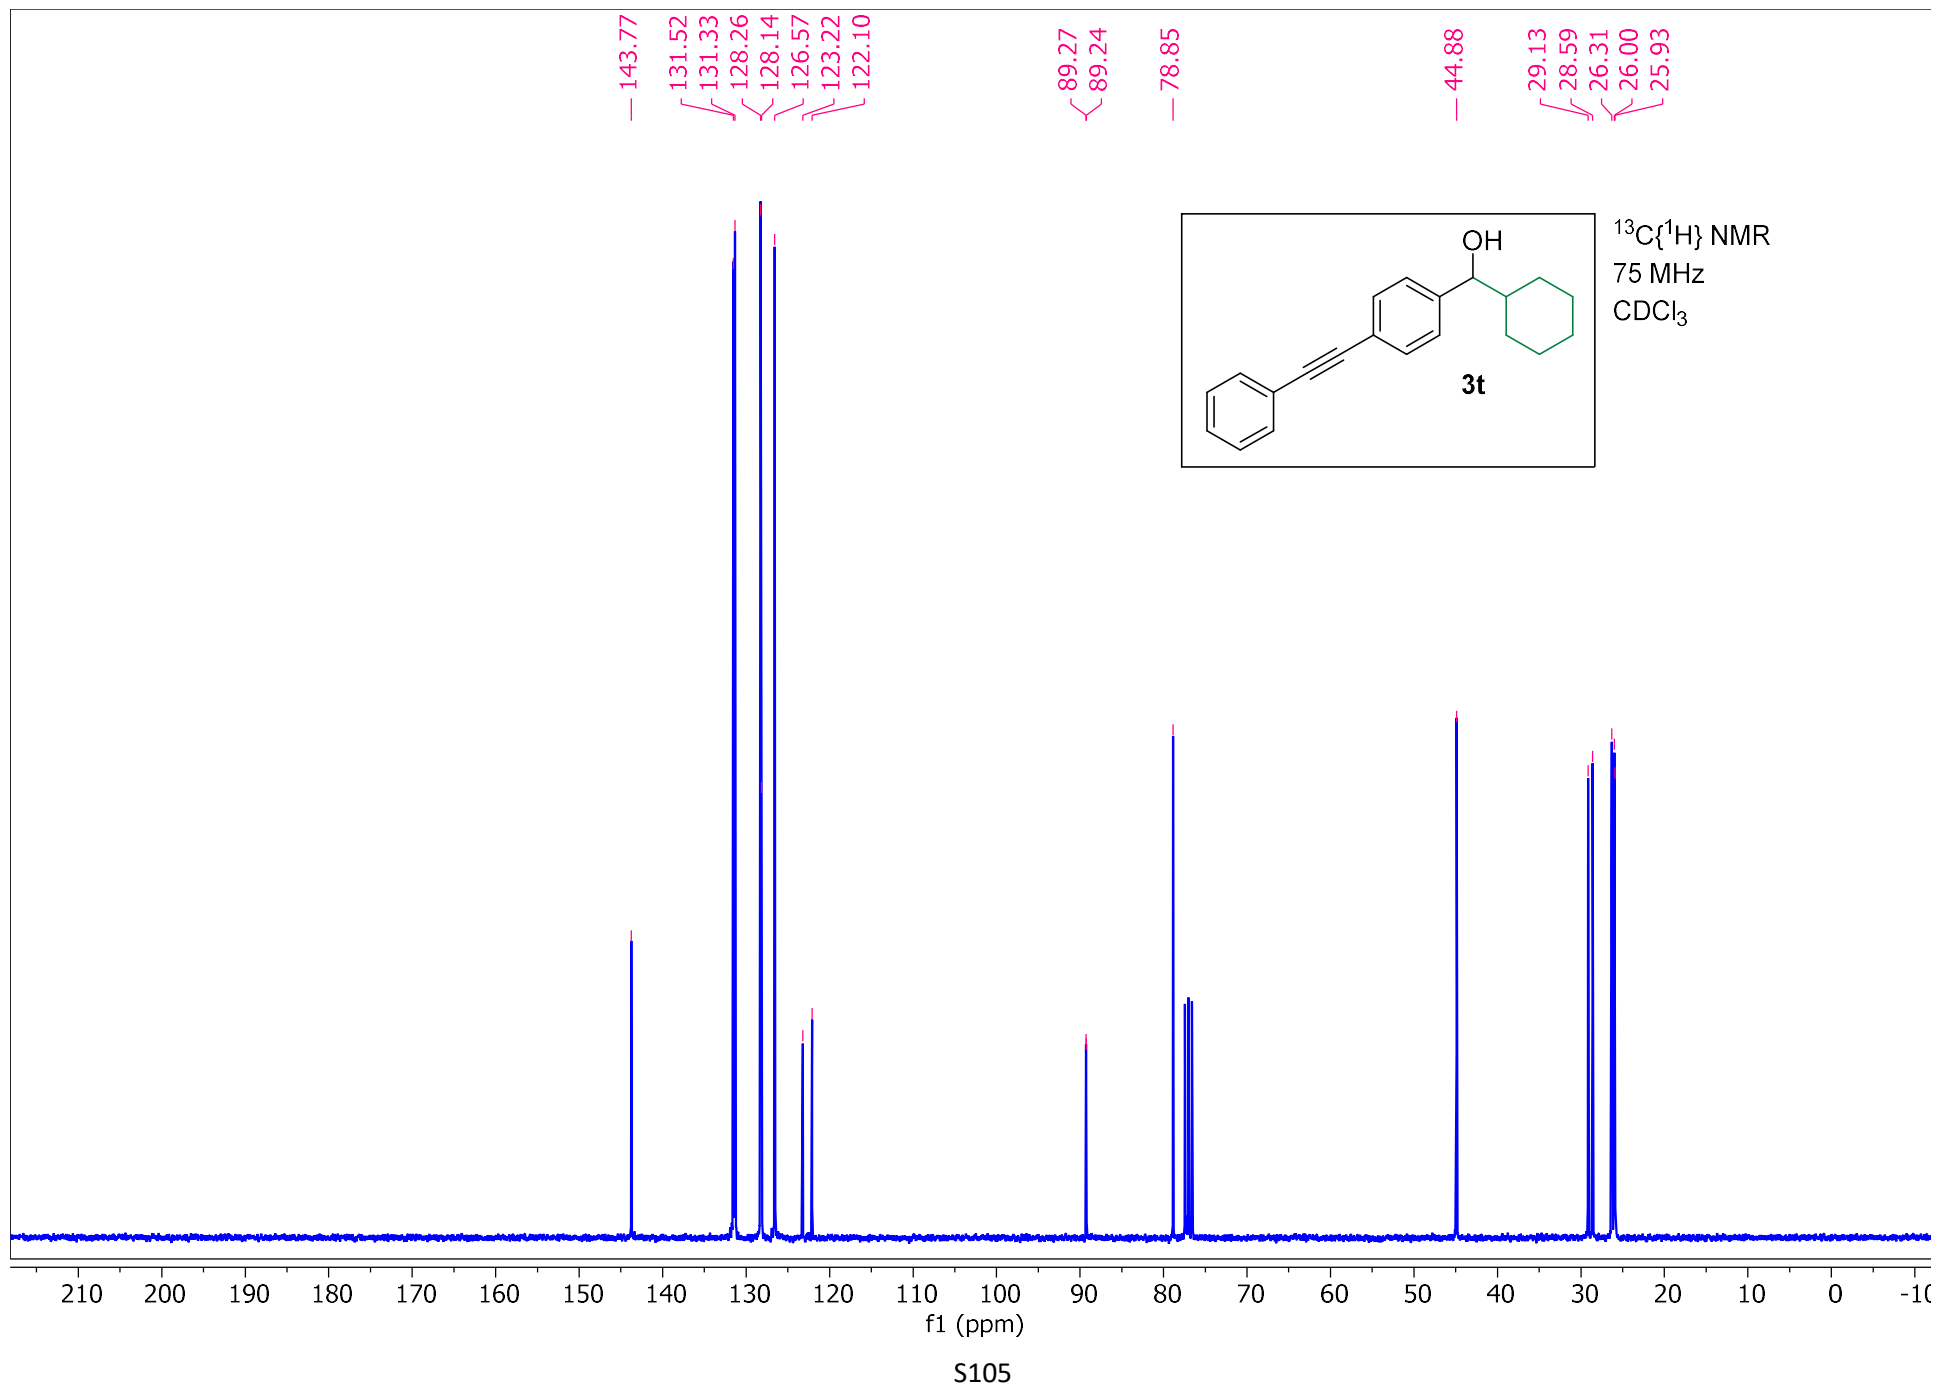

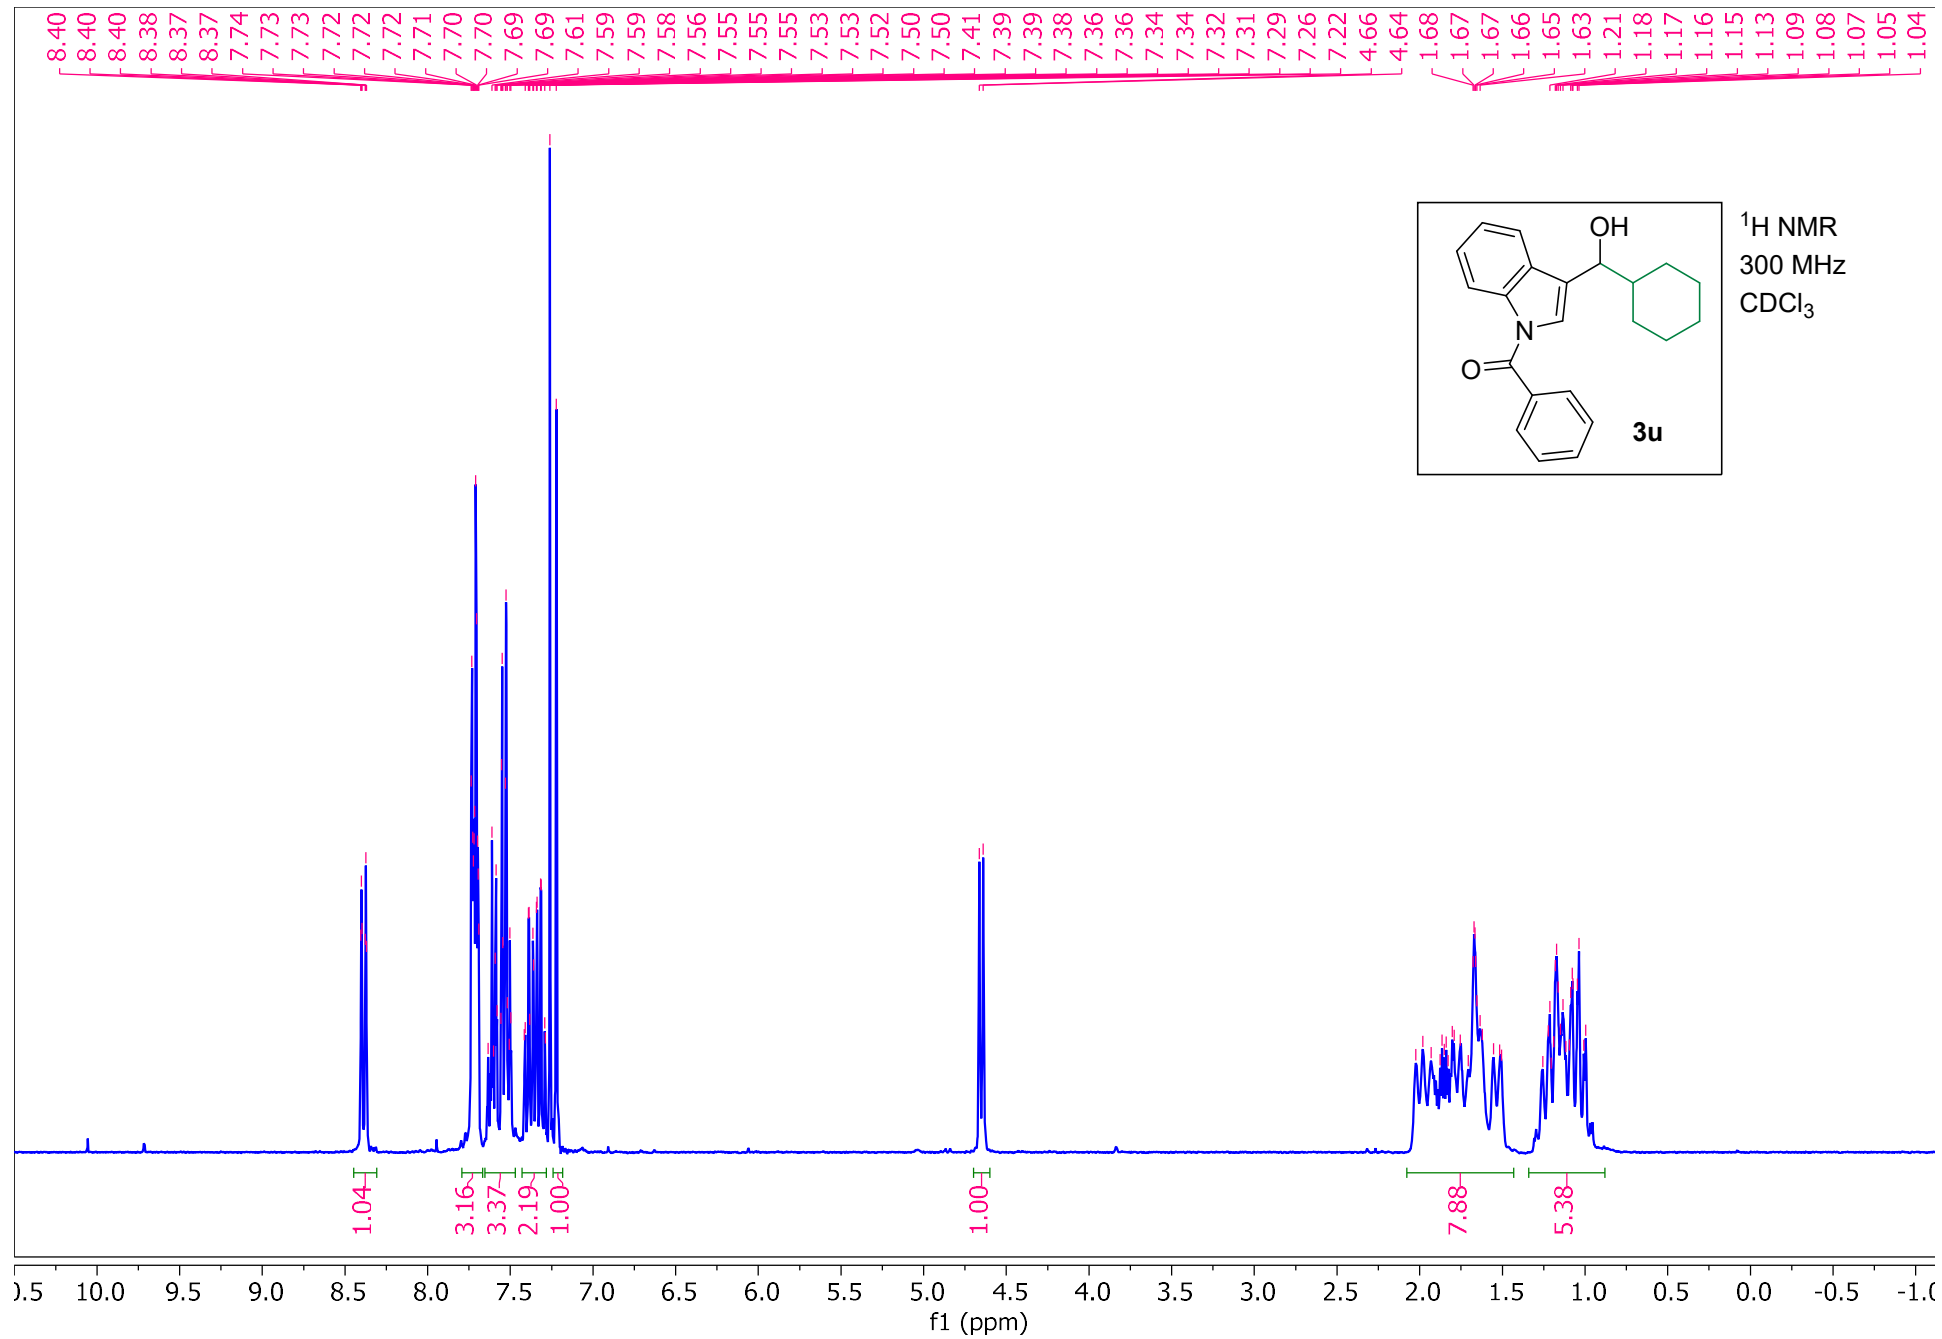

S106

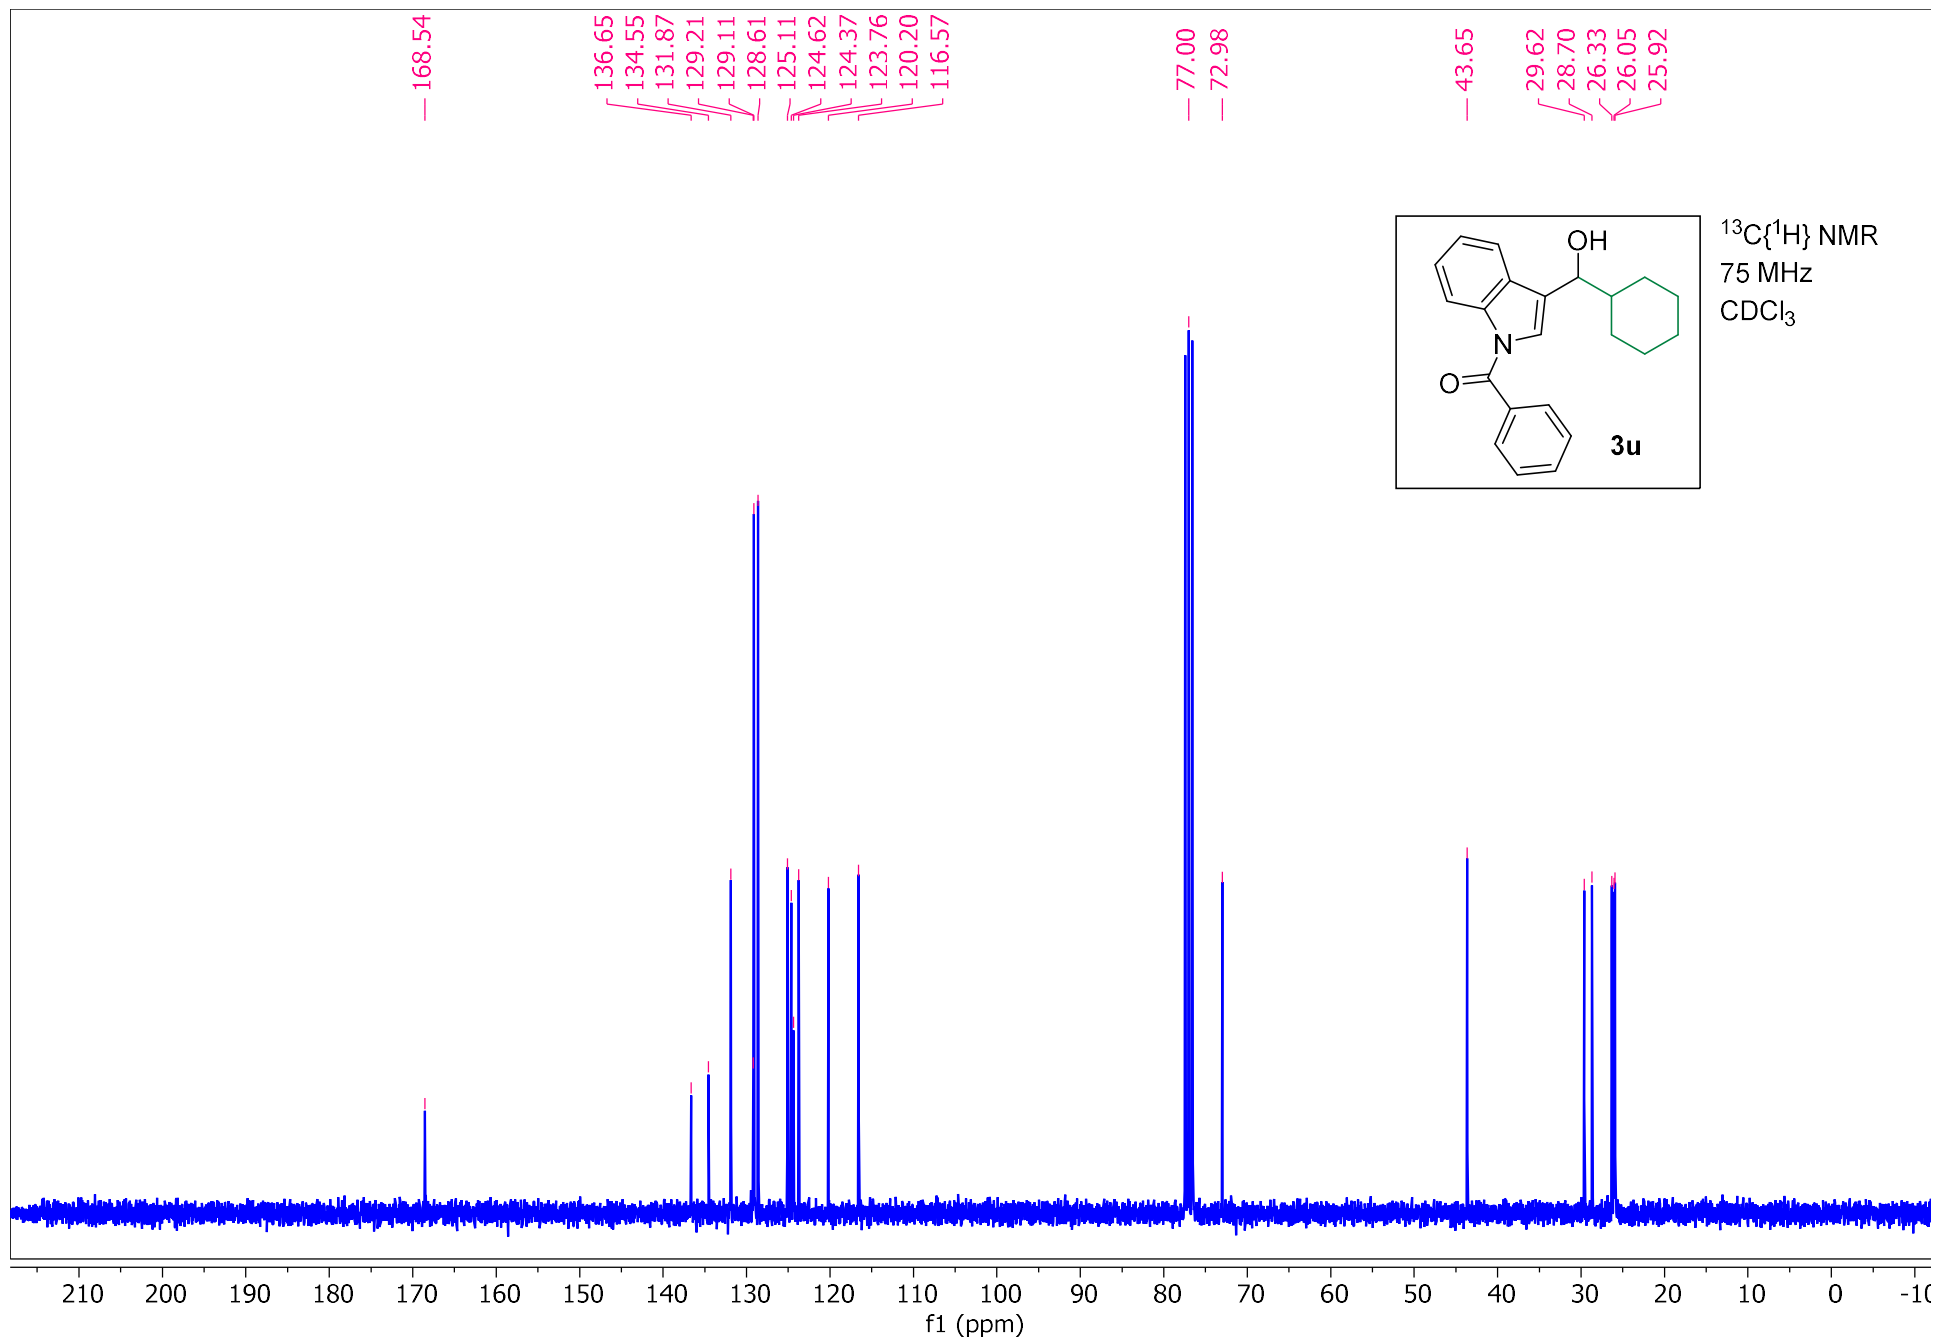

S107

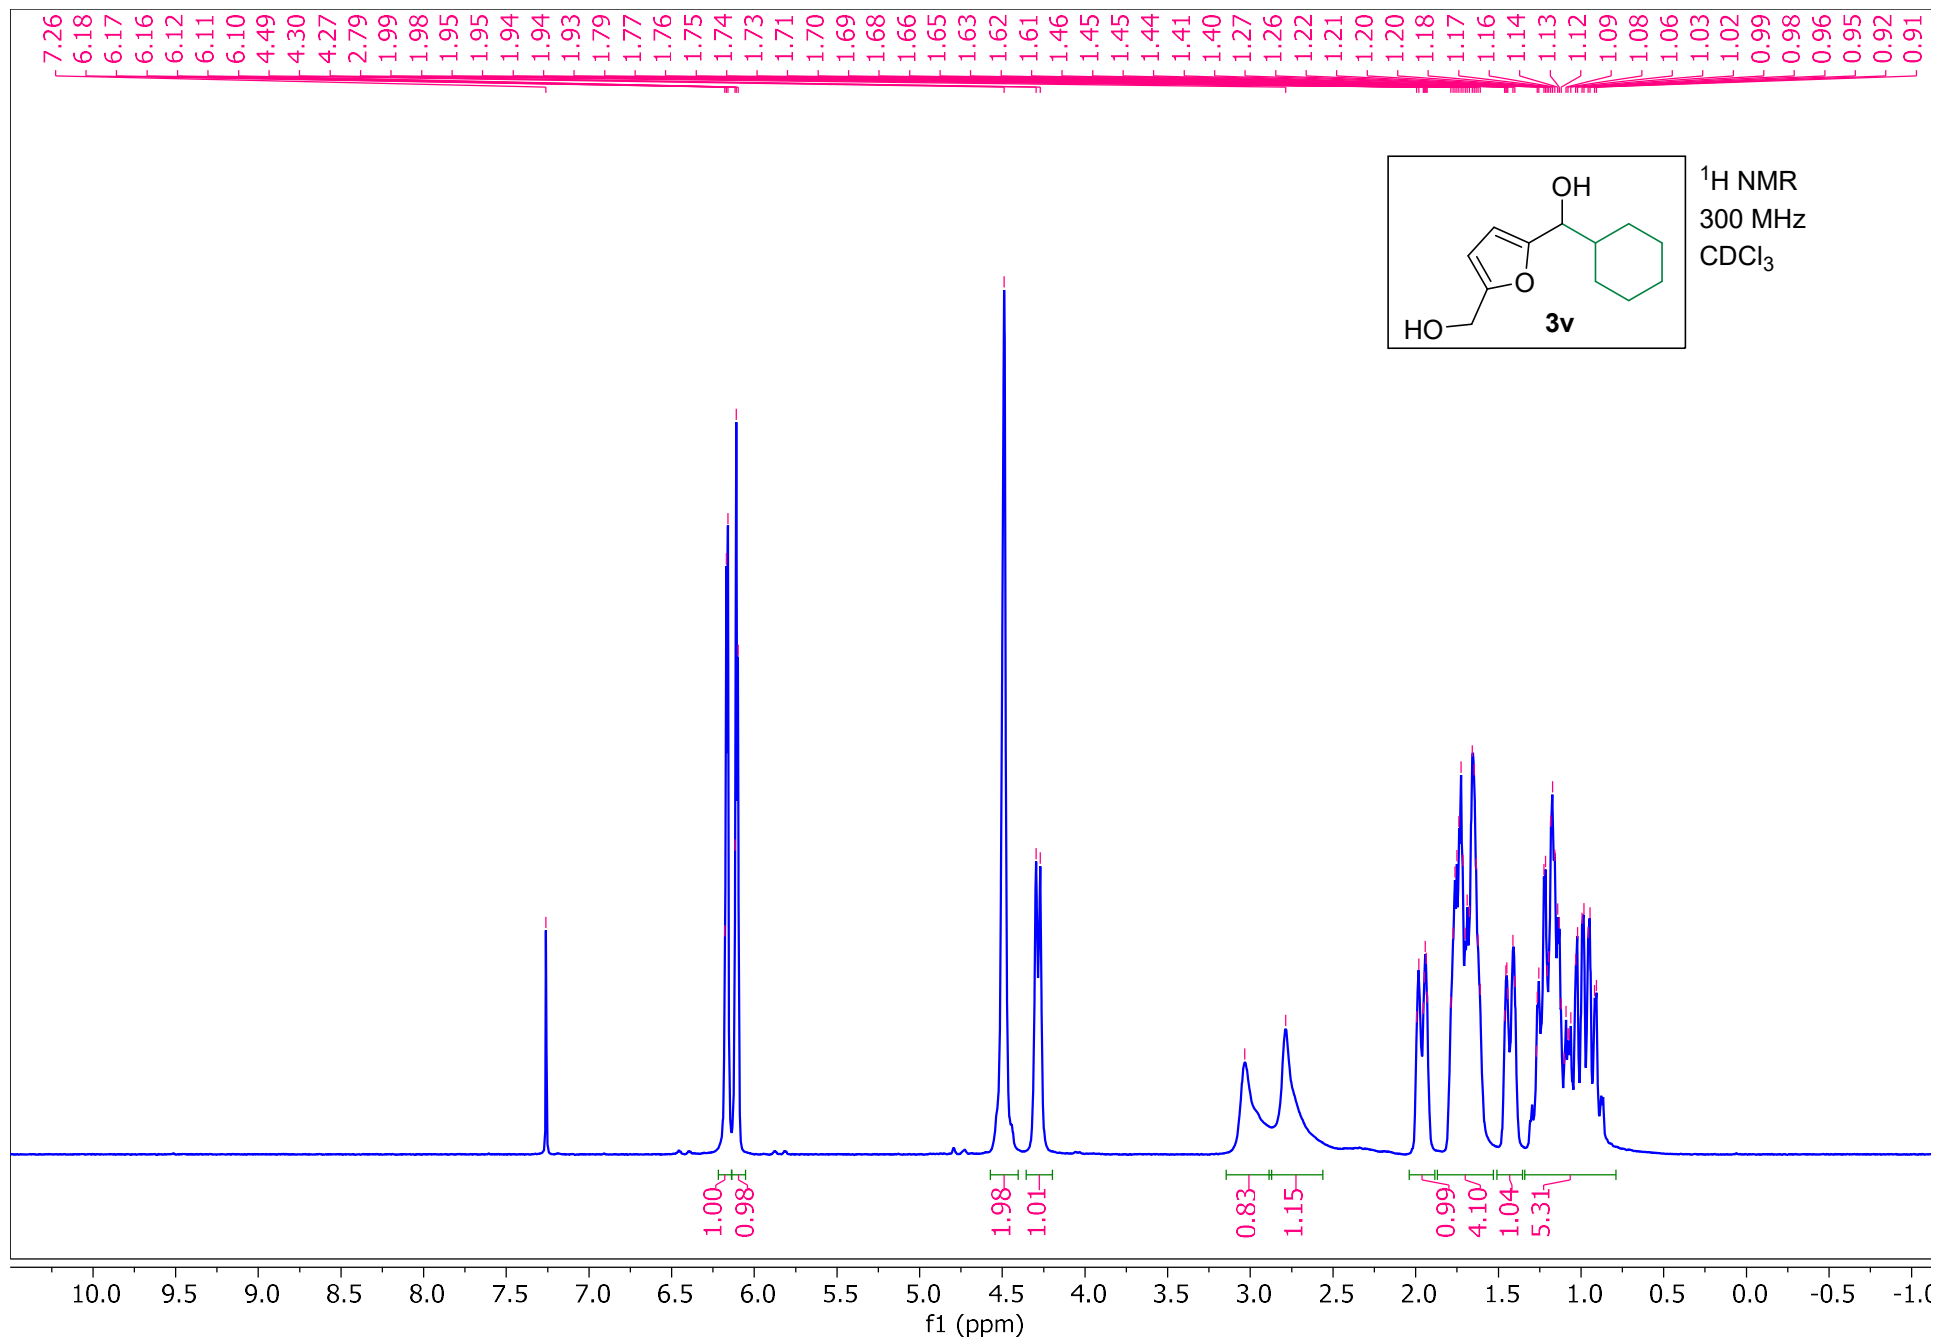

S108

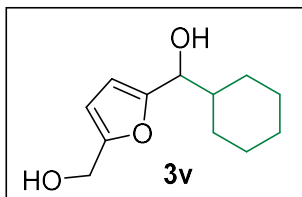

$^{13}\text{C}\{^1\text{H}\}$  NMR  
75 MHz  
 $\text{CDCl}_3$

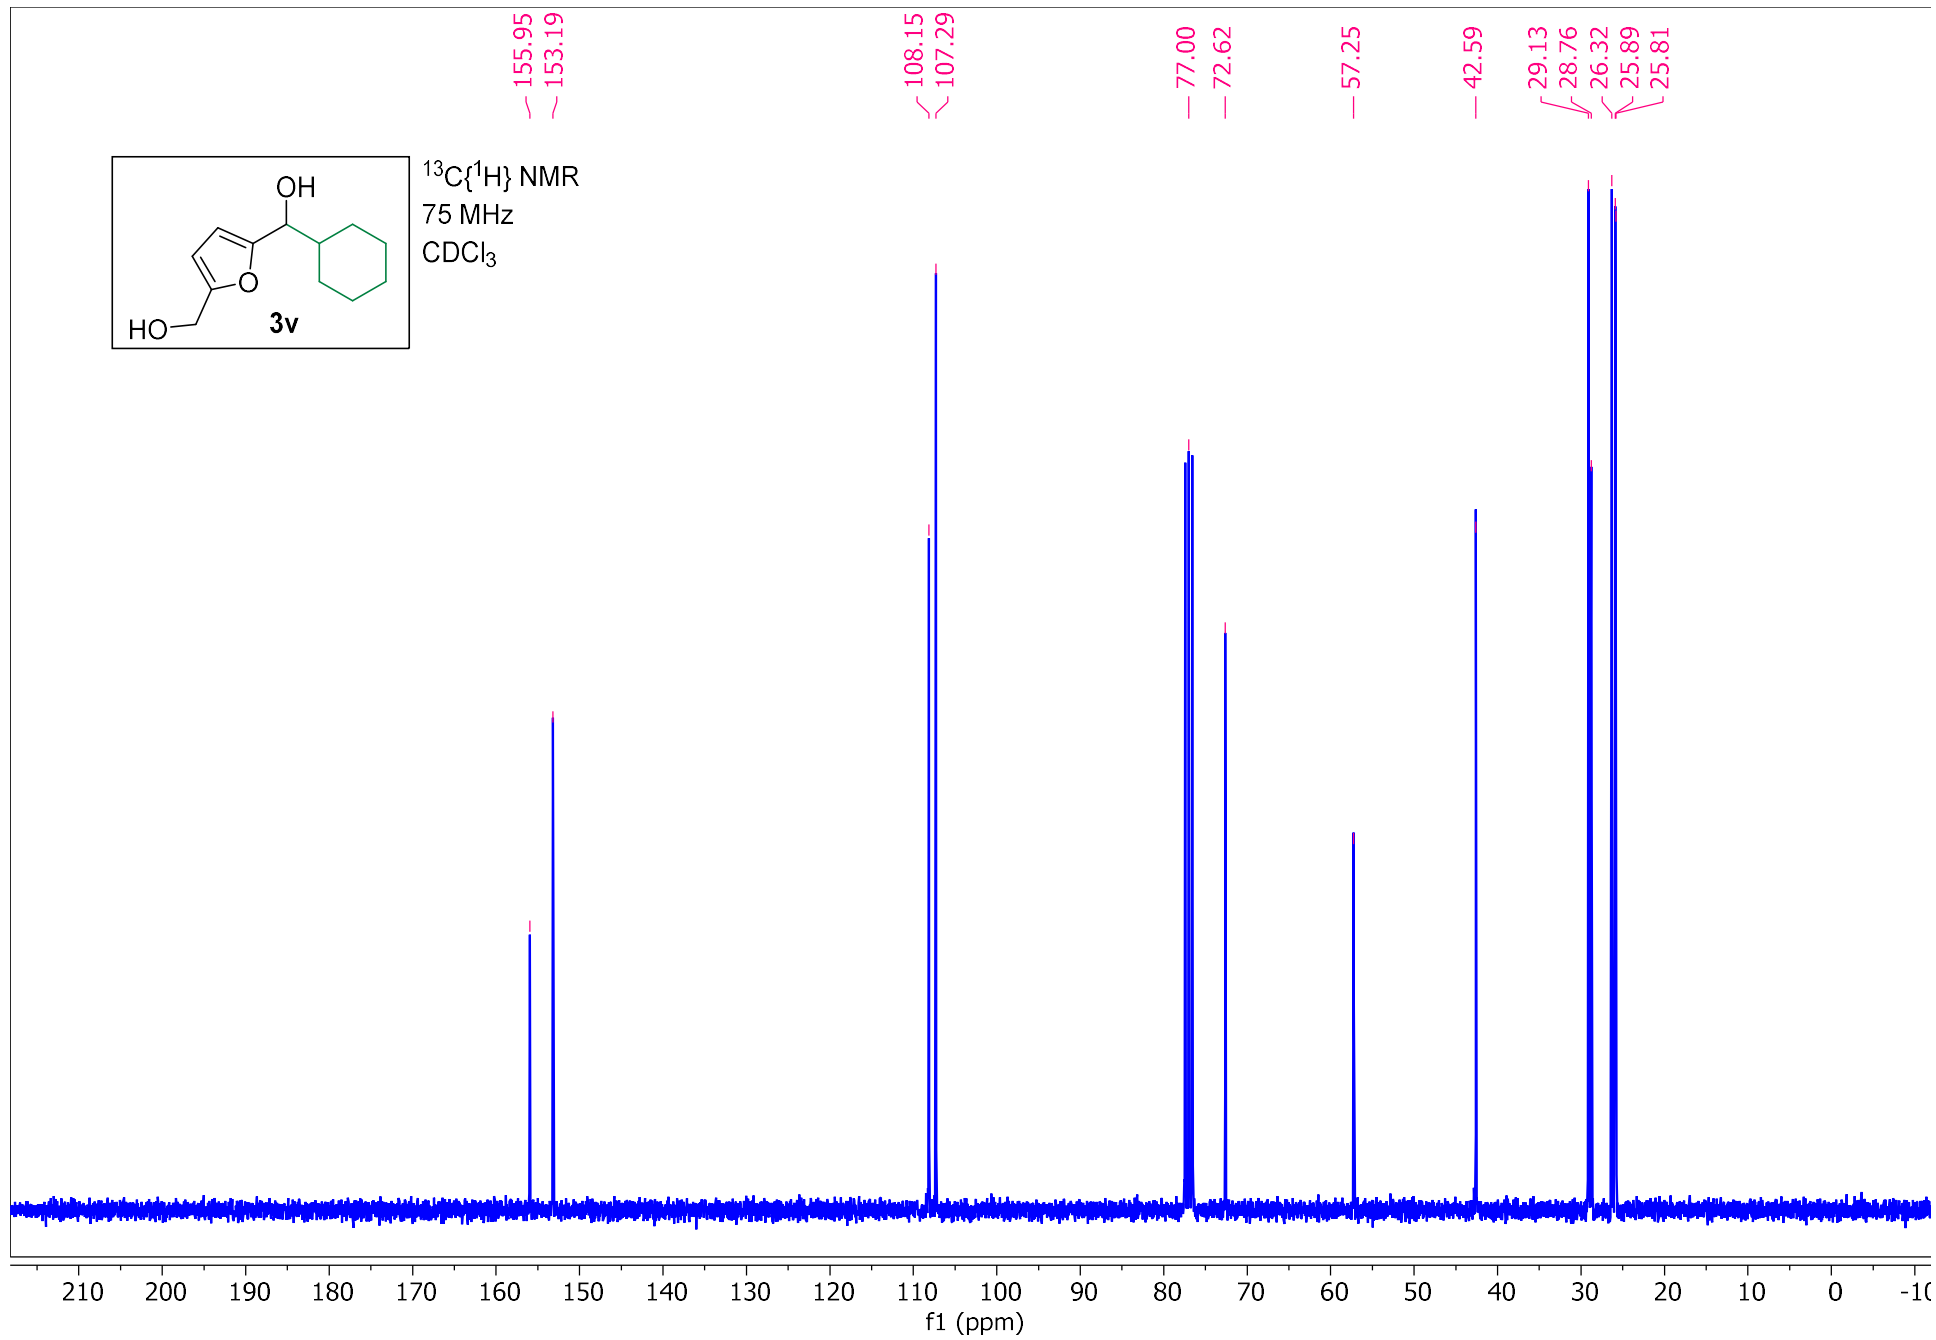

S109

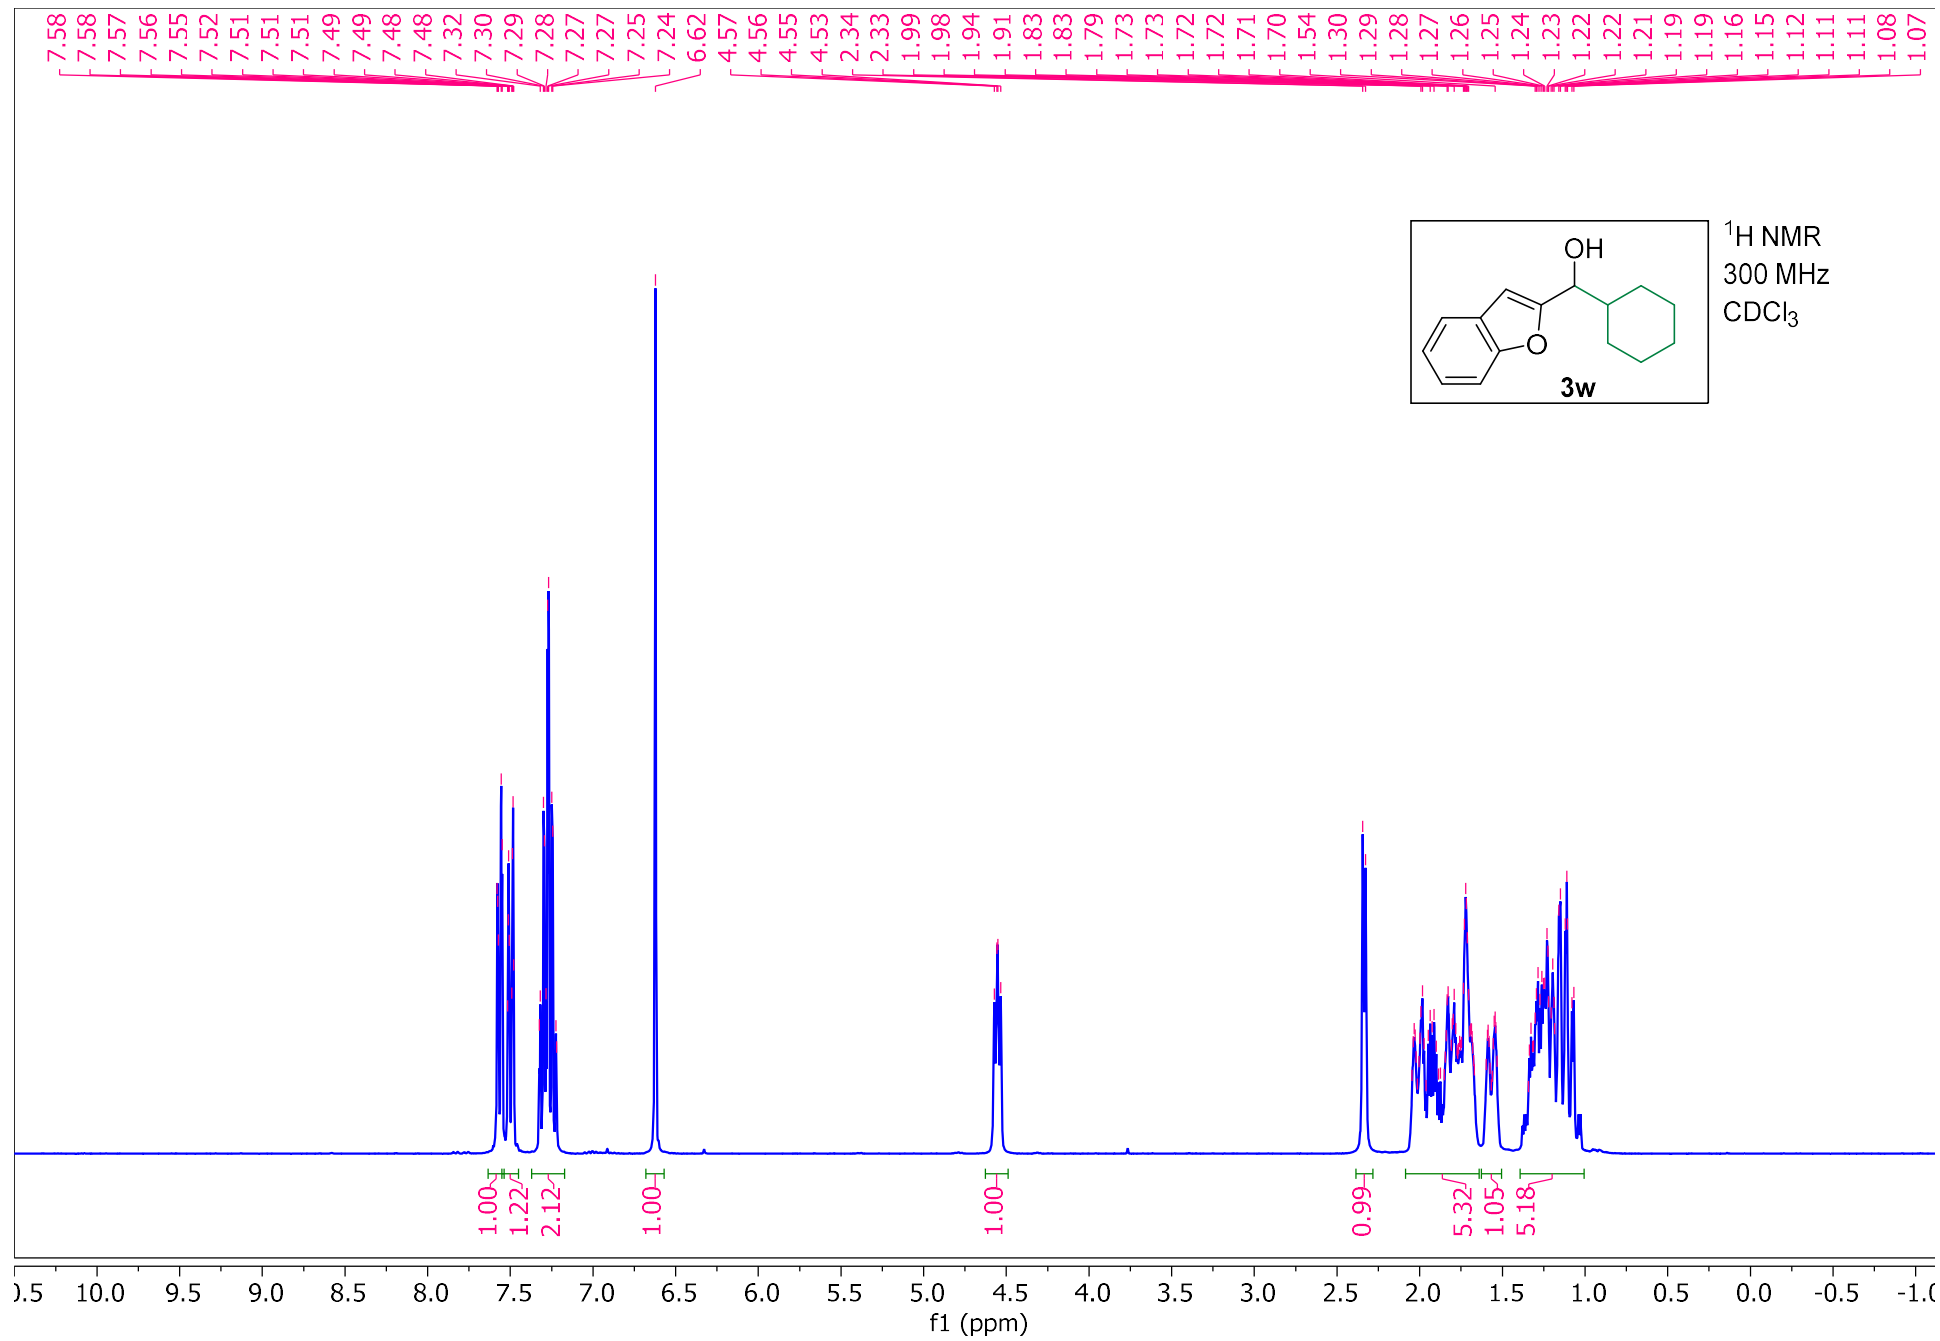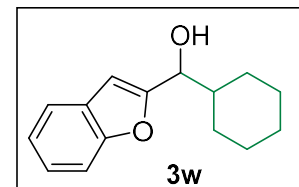

<sup>1</sup>H NMR  
300 MHz  
CDCl<sub>3</sub>

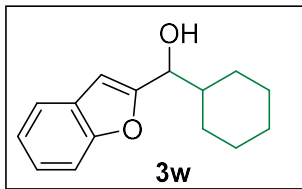

$^{13}\text{C}\{^1\text{H}\}$  NMR  
75 MHz  
 $\text{CDCl}_3$

- 158.67
- 154.61
- ✓ 128.07
- ✓ 123.85
- 122.65
- ✓ 120.82
- 111.16
- 103.34
- 77.00
- 73.06
- 42.65
- ✓ 29.08
- ✓ 28.38
- ✓ 26.27
- ✓ 25.90
- ✓ 25.82

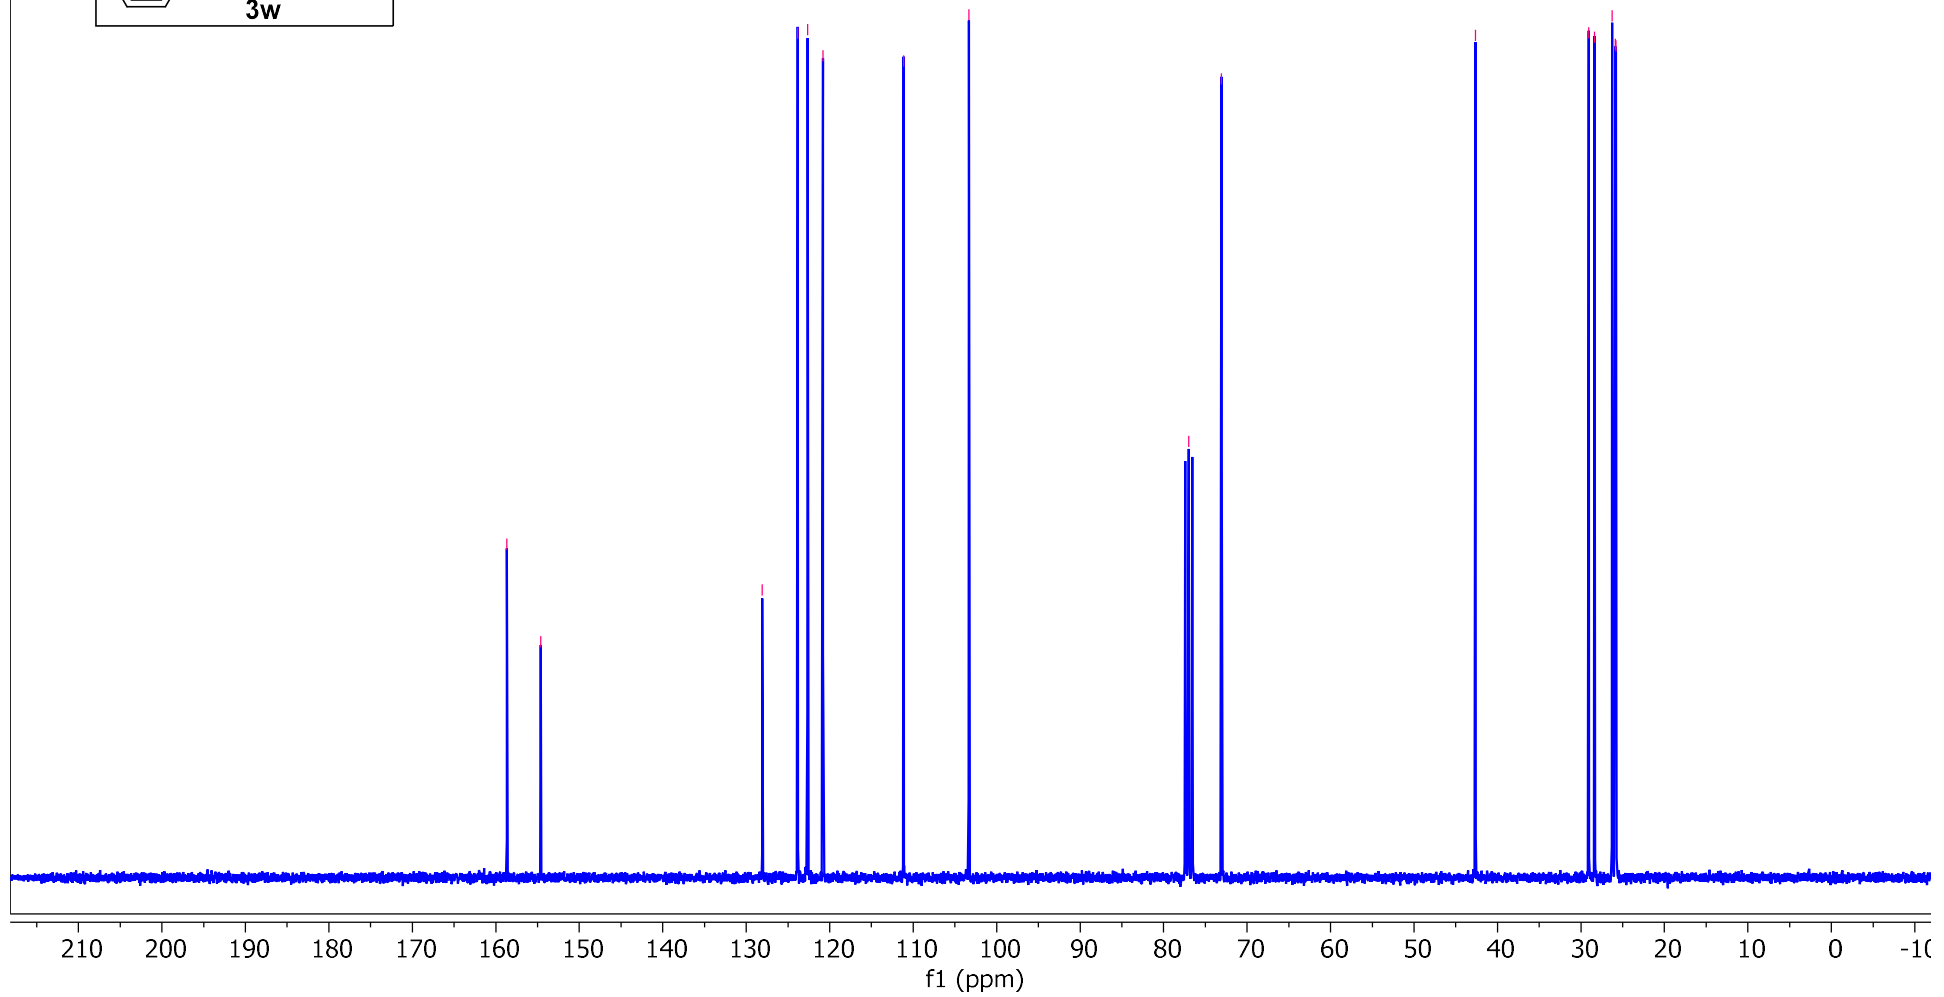

S111

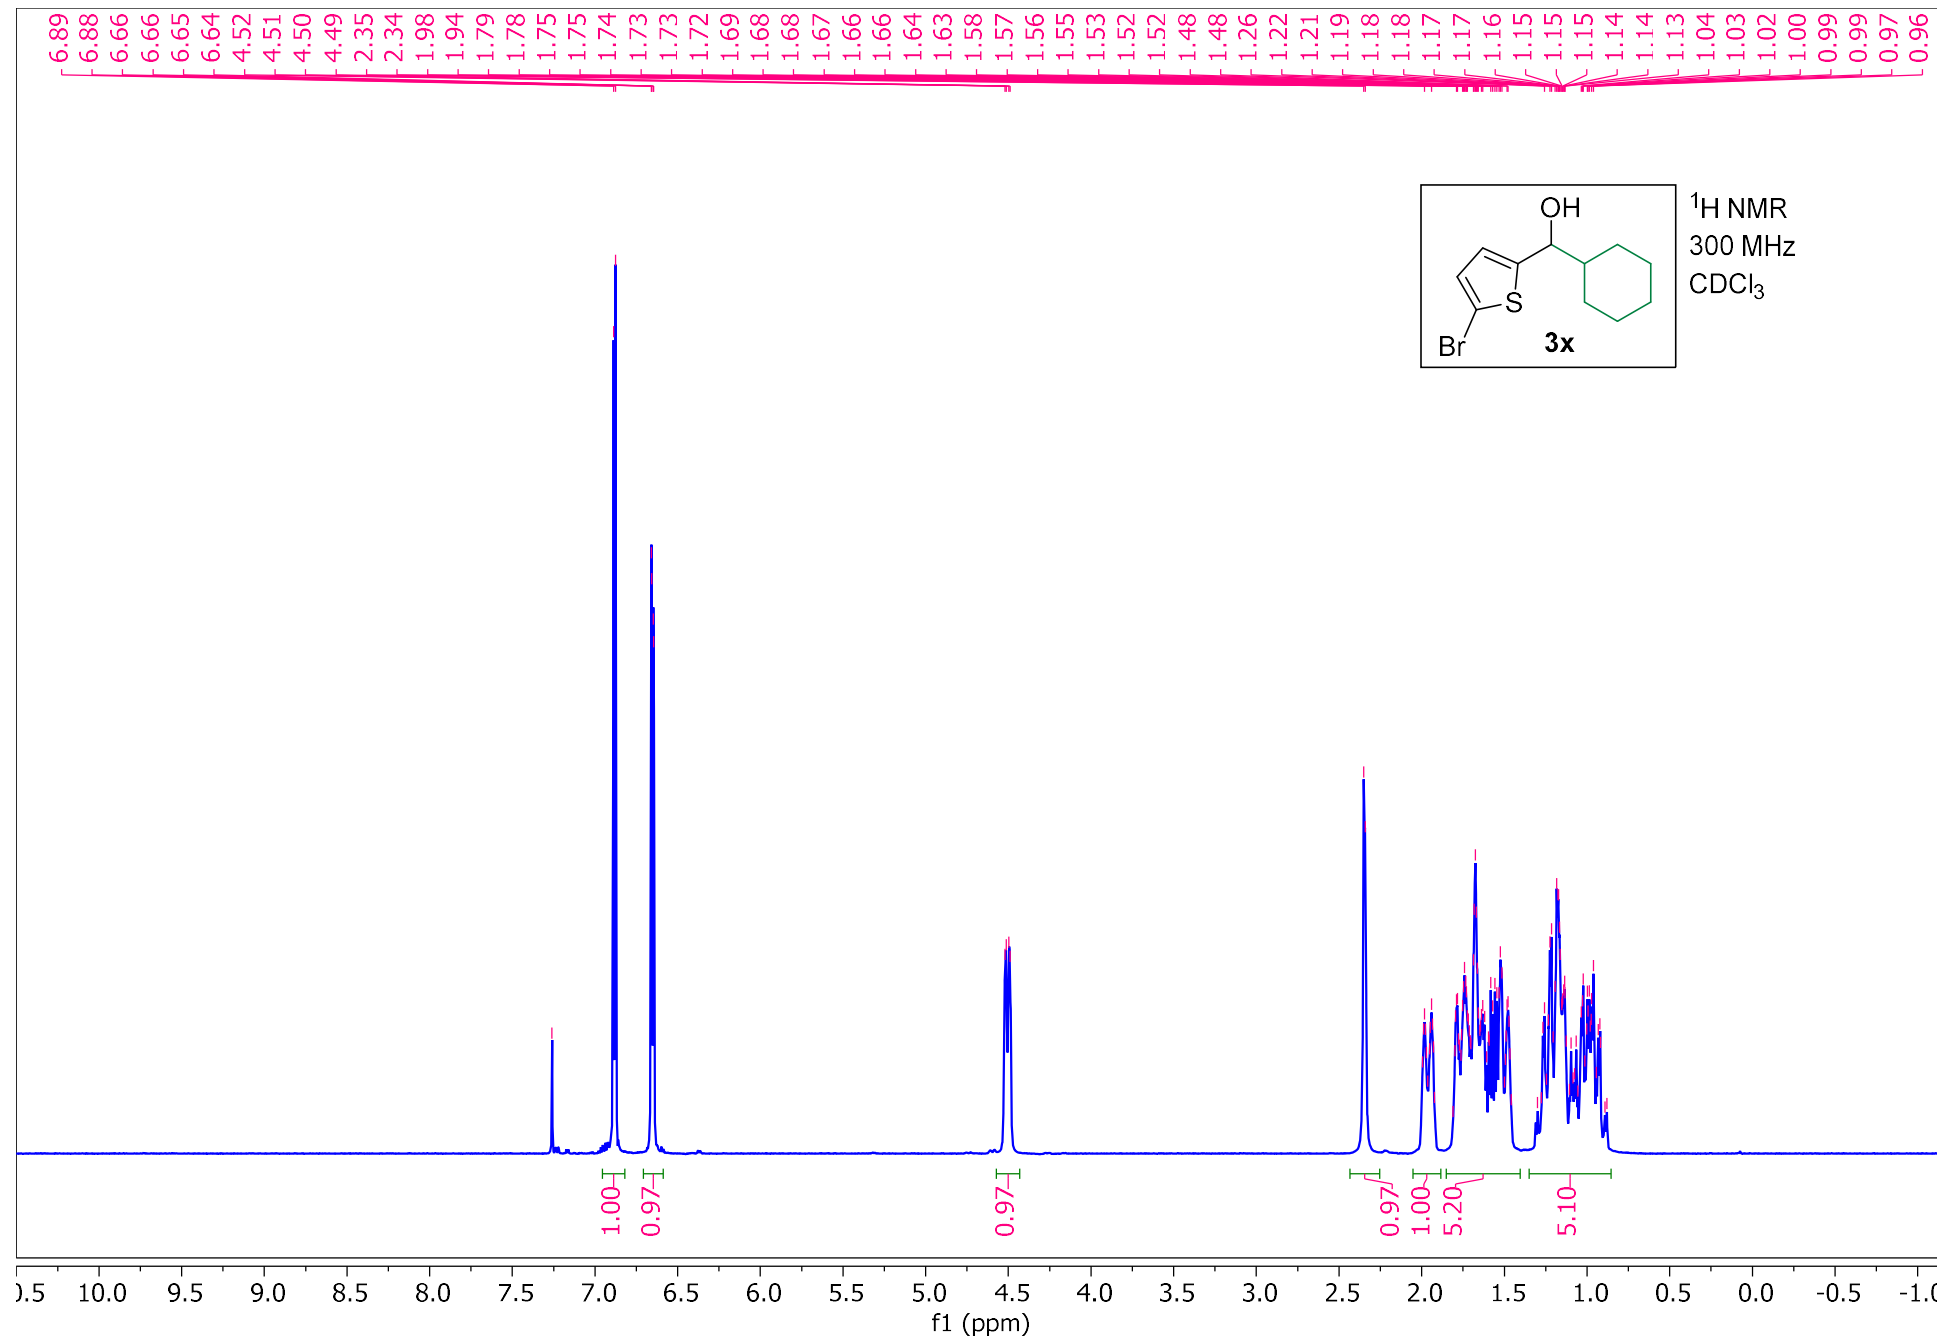

S112



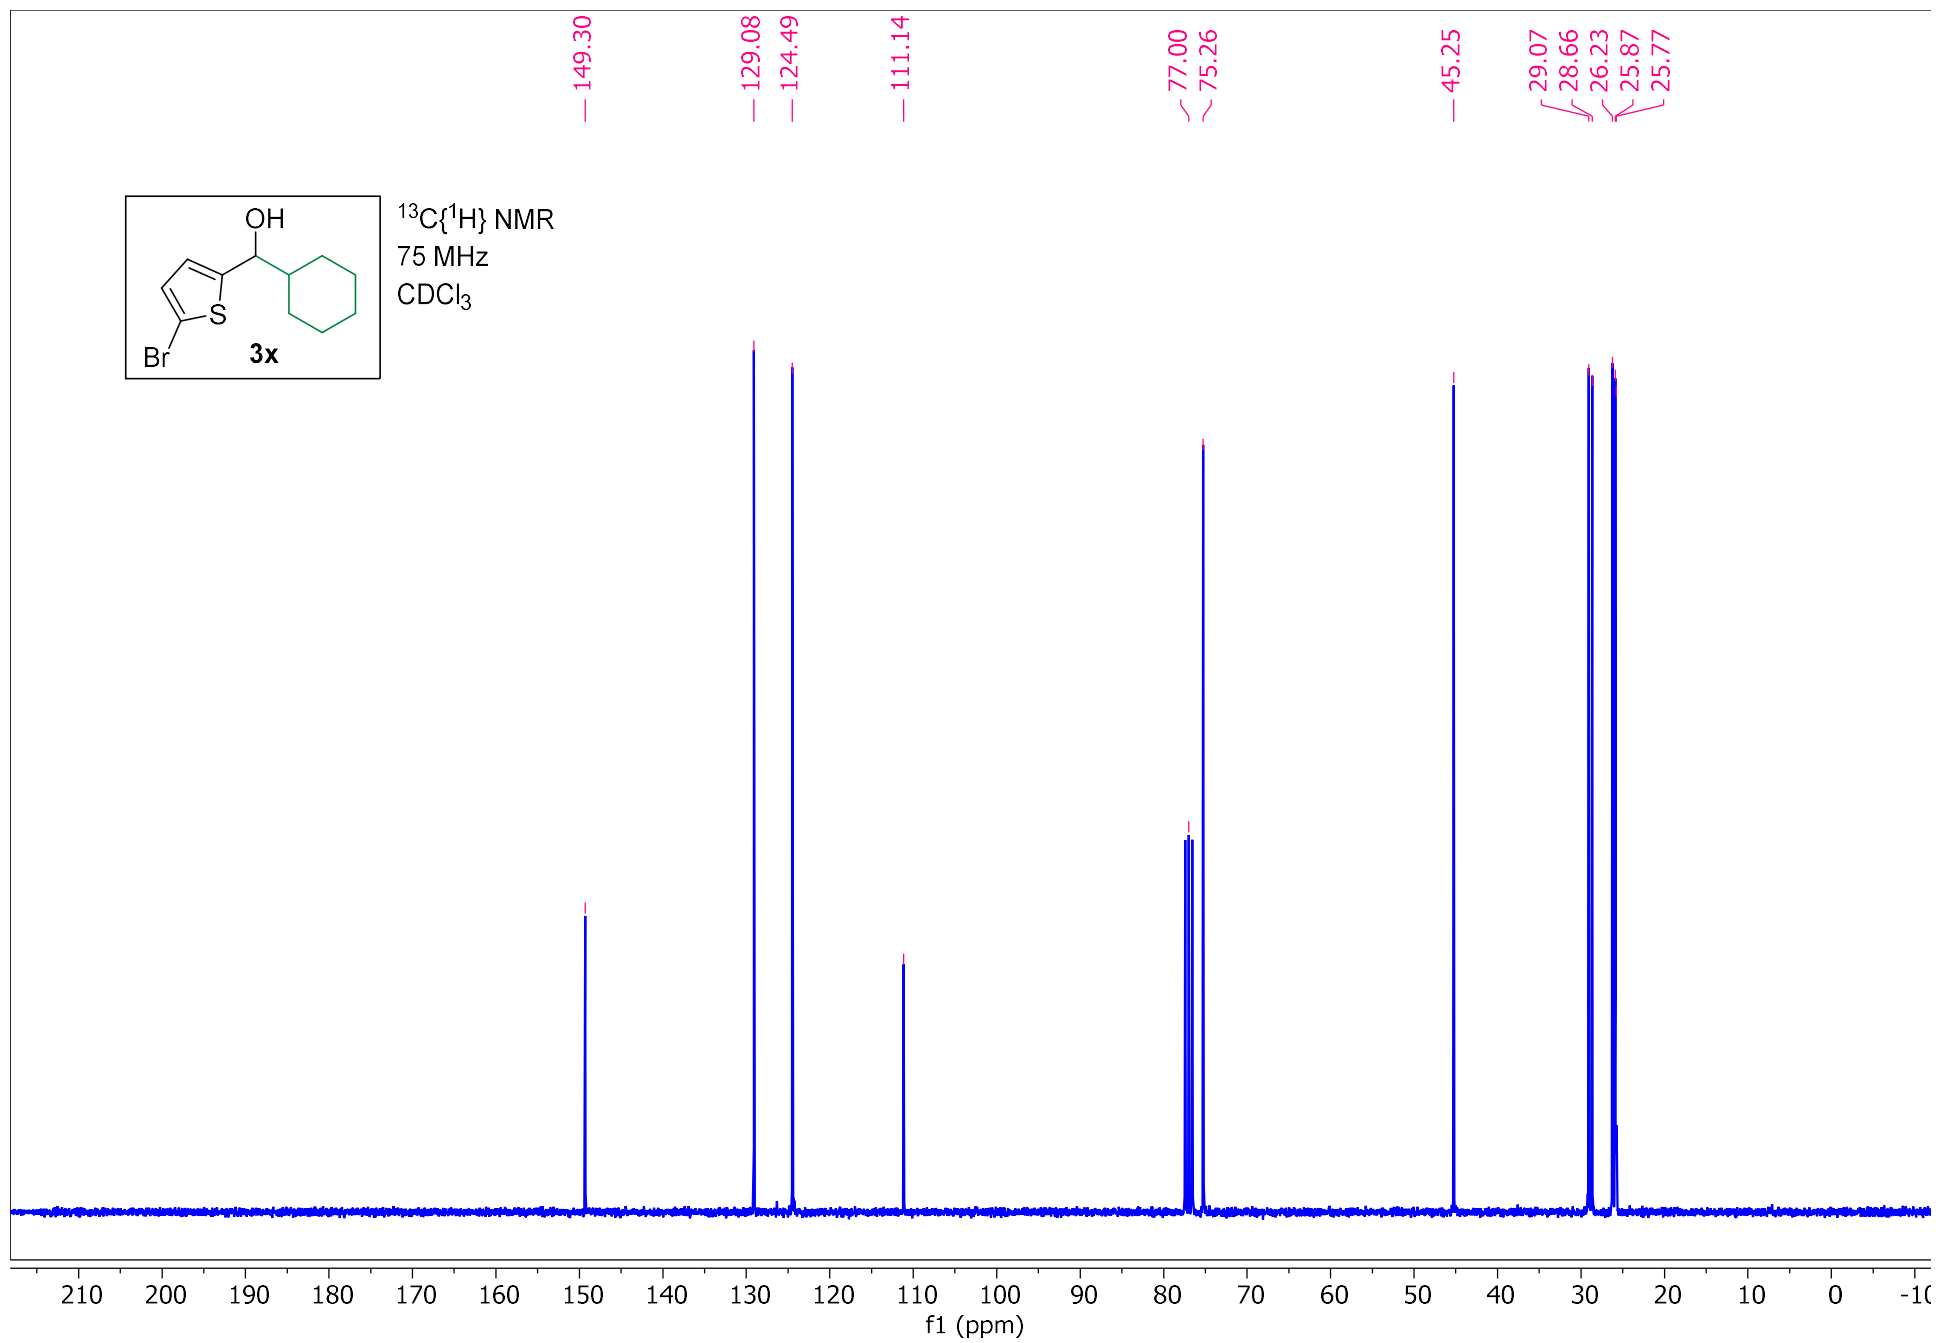

S113

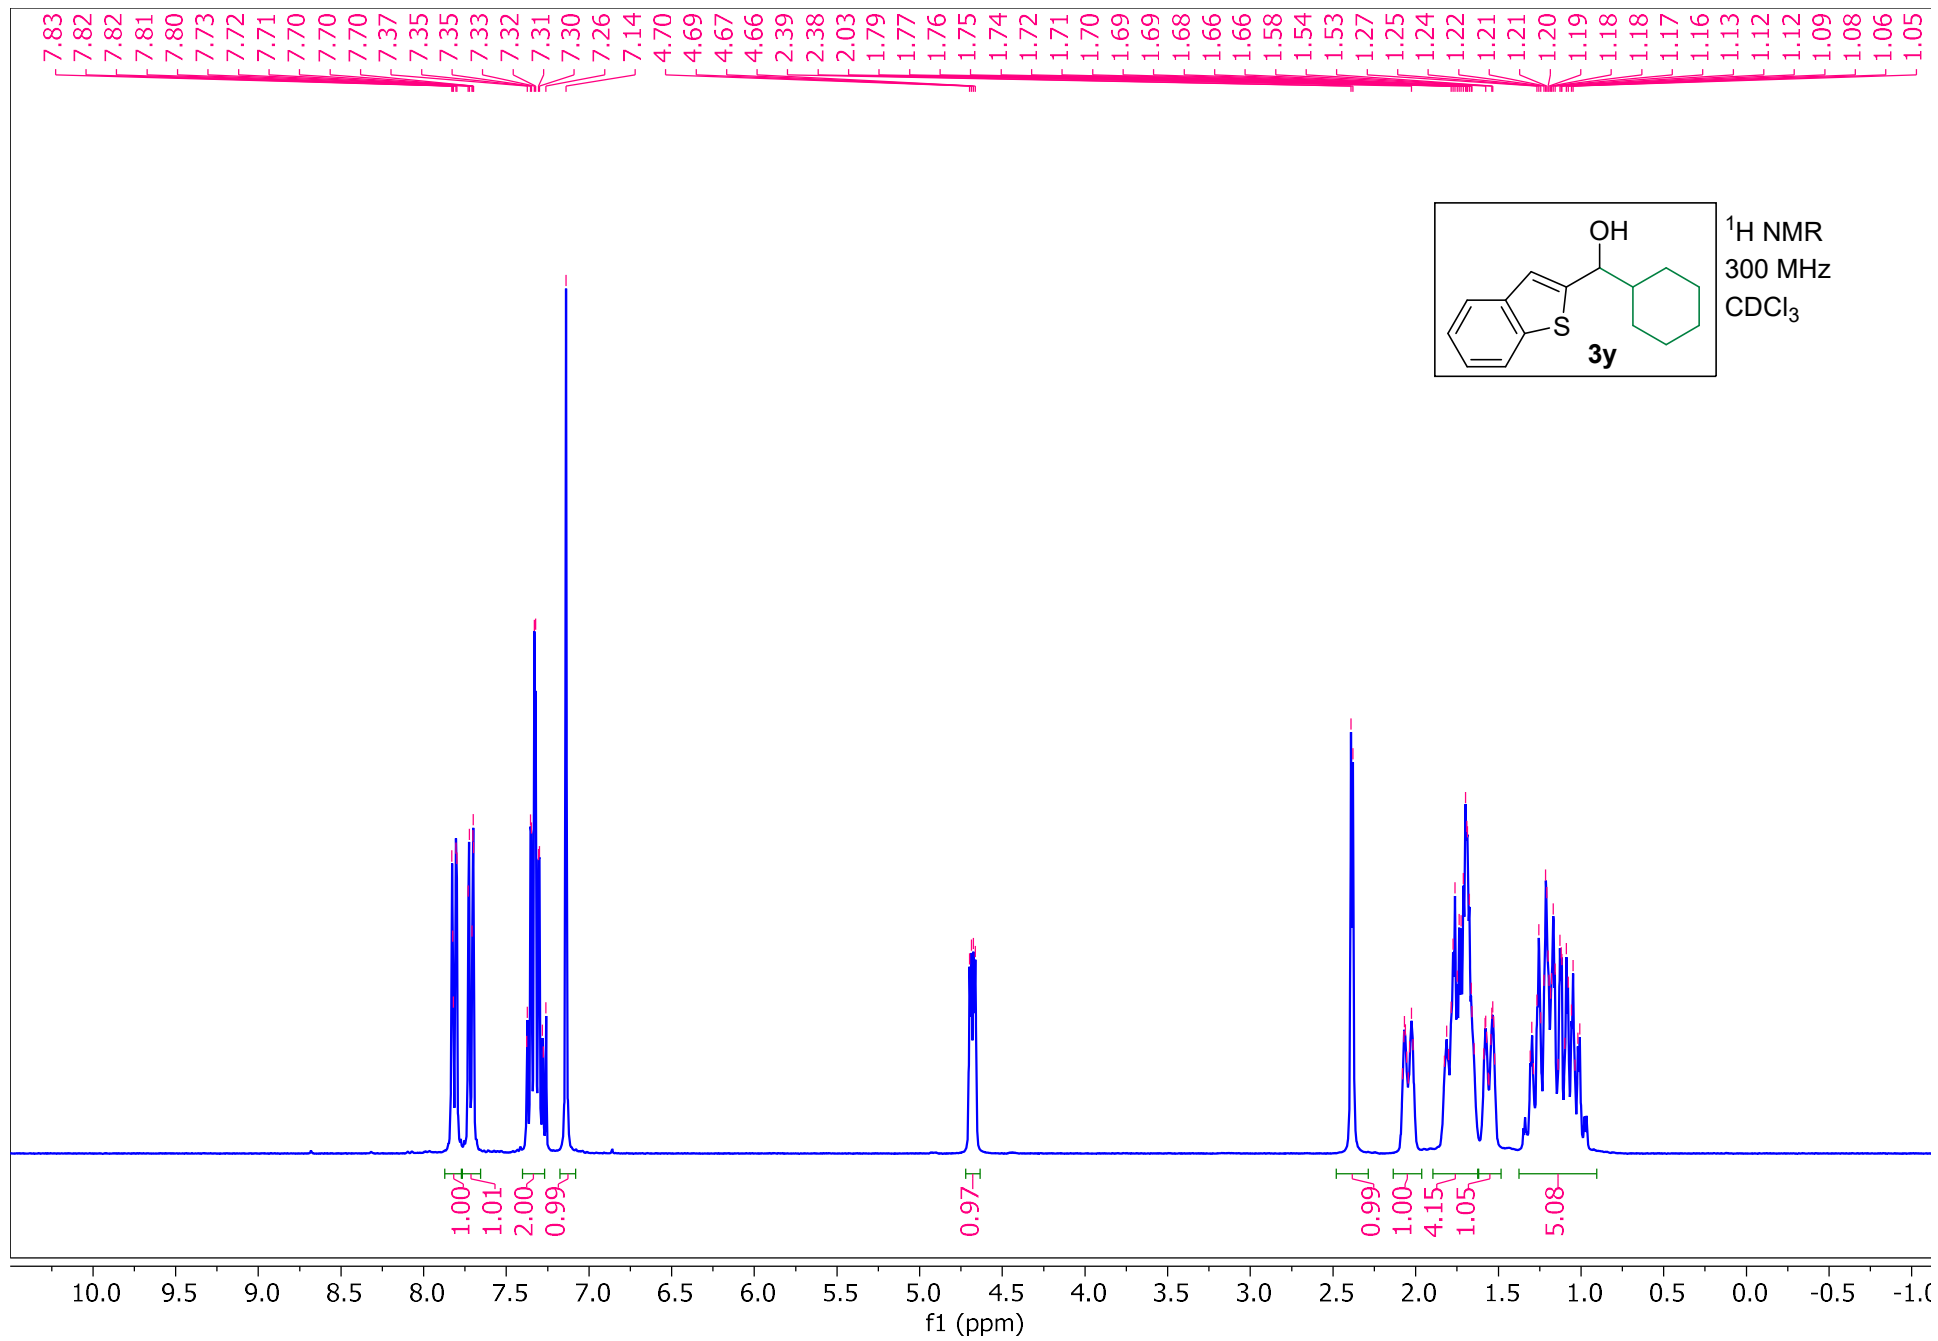

S114

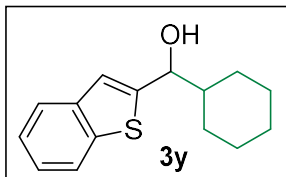

$^{13}\text{C}\{^1\text{H}\}$  NMR  
75 MHz  
 $\text{CDCl}_3$

— 148.33  
139.34  
139.30  
124.12  
123.97  
123.26  
122.37  
120.77  
— 75.55  
— 45.12  
29.23  
28.61  
26.27  
25.91  
25.82

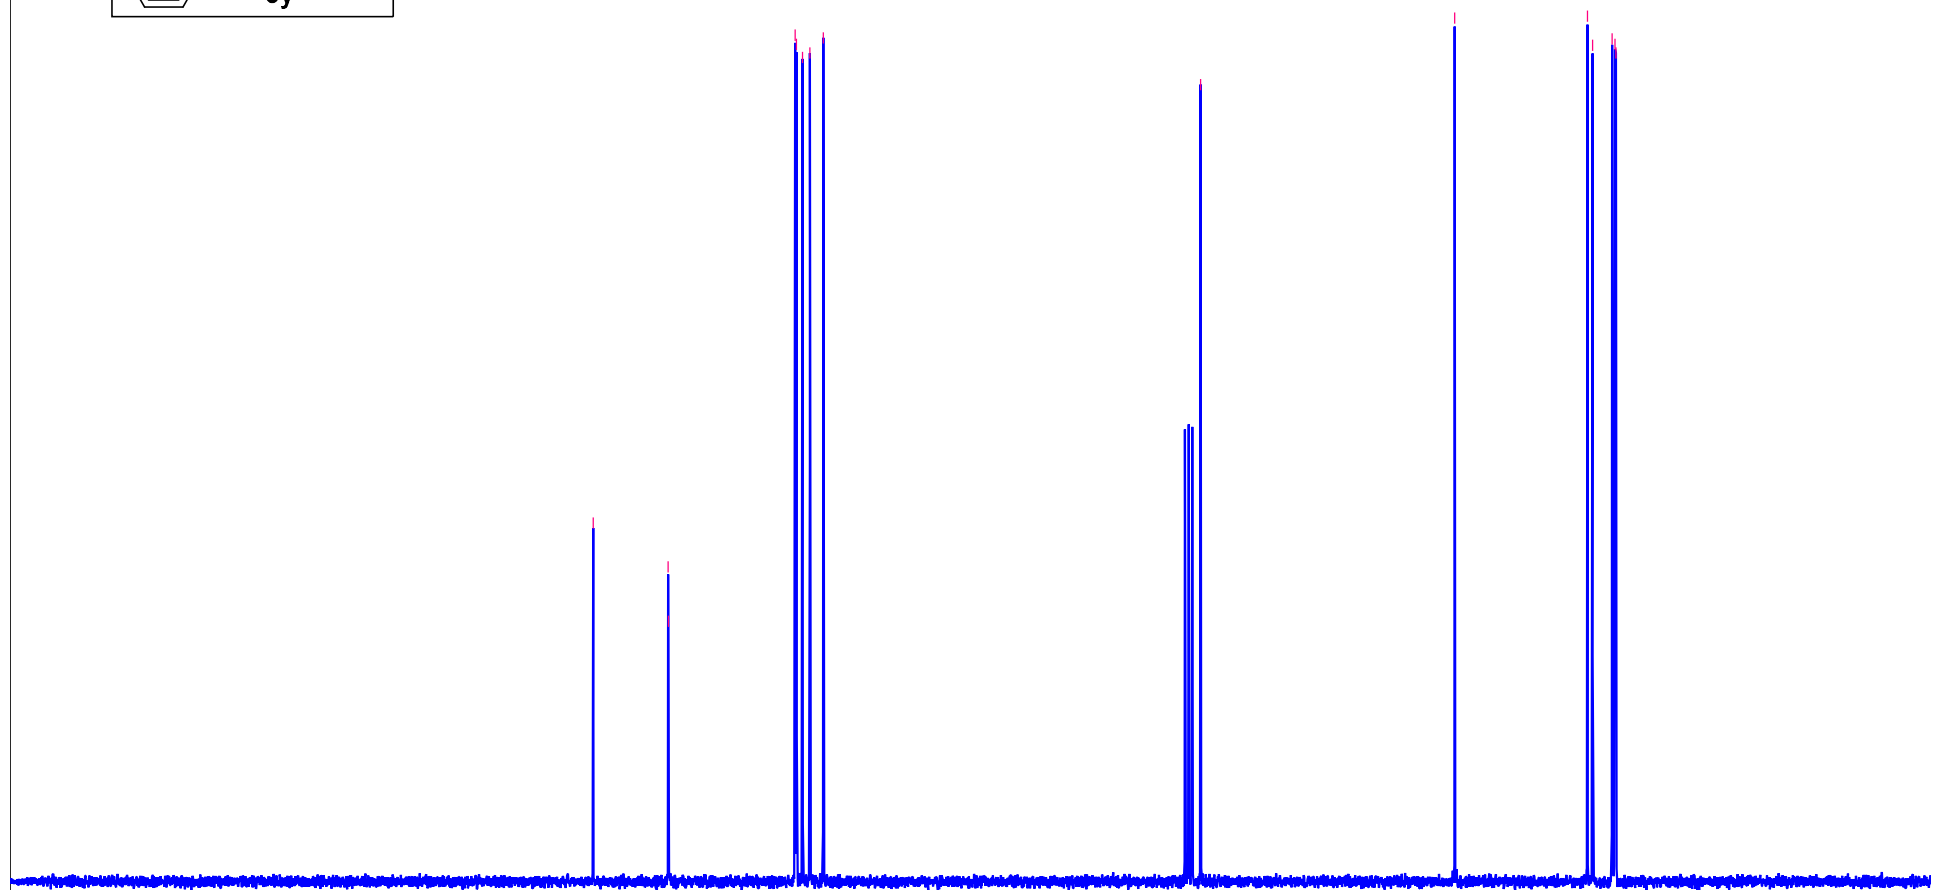

210 200 190 180 170 160 150 140 130 120 110 100 90 80 70 60 50 40 30 20 10 0 -10

f1 (ppm)  
S115

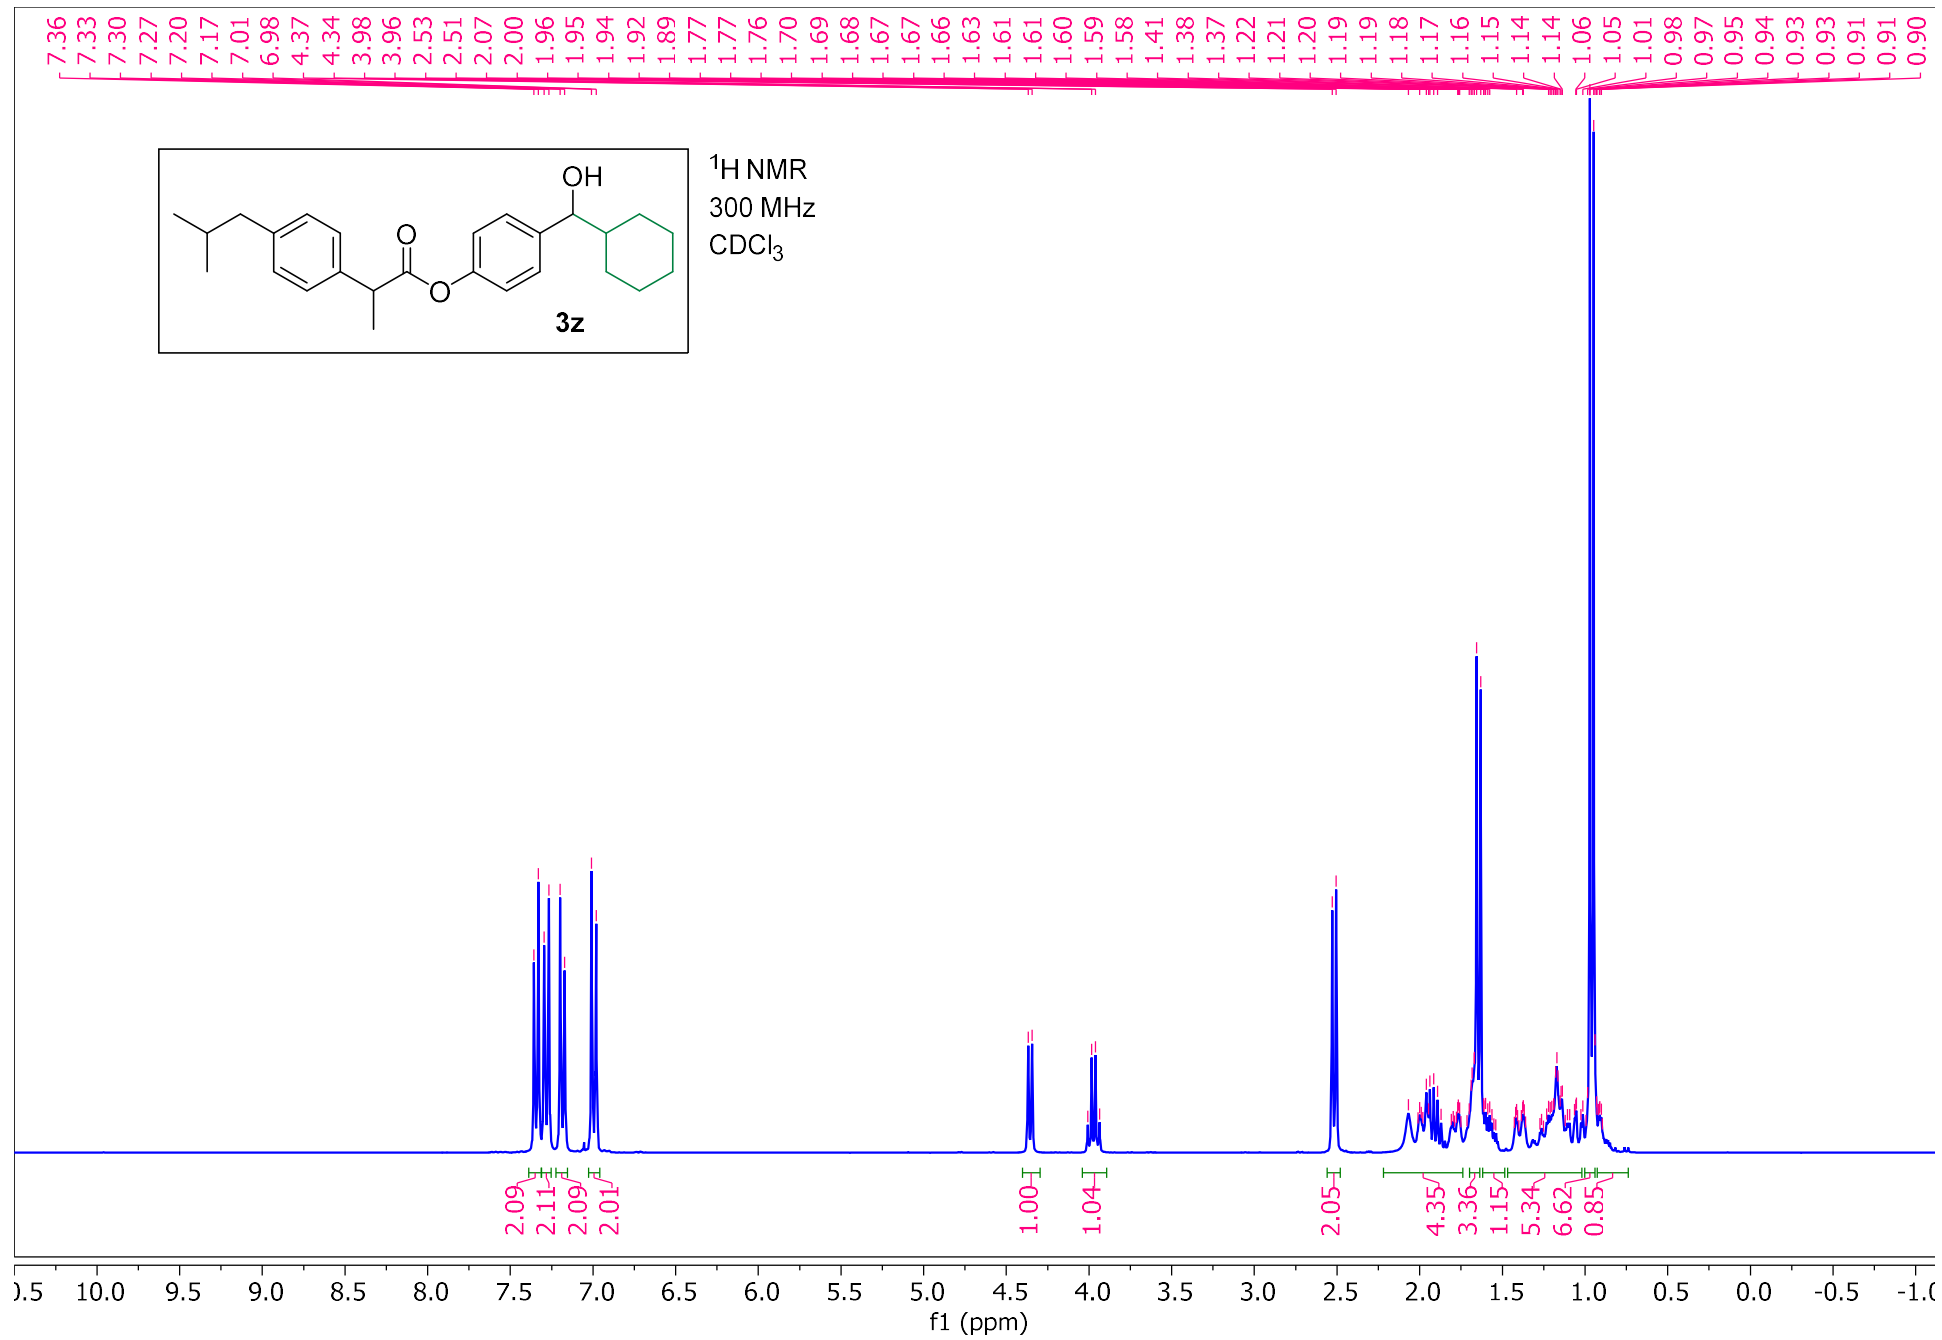

S116

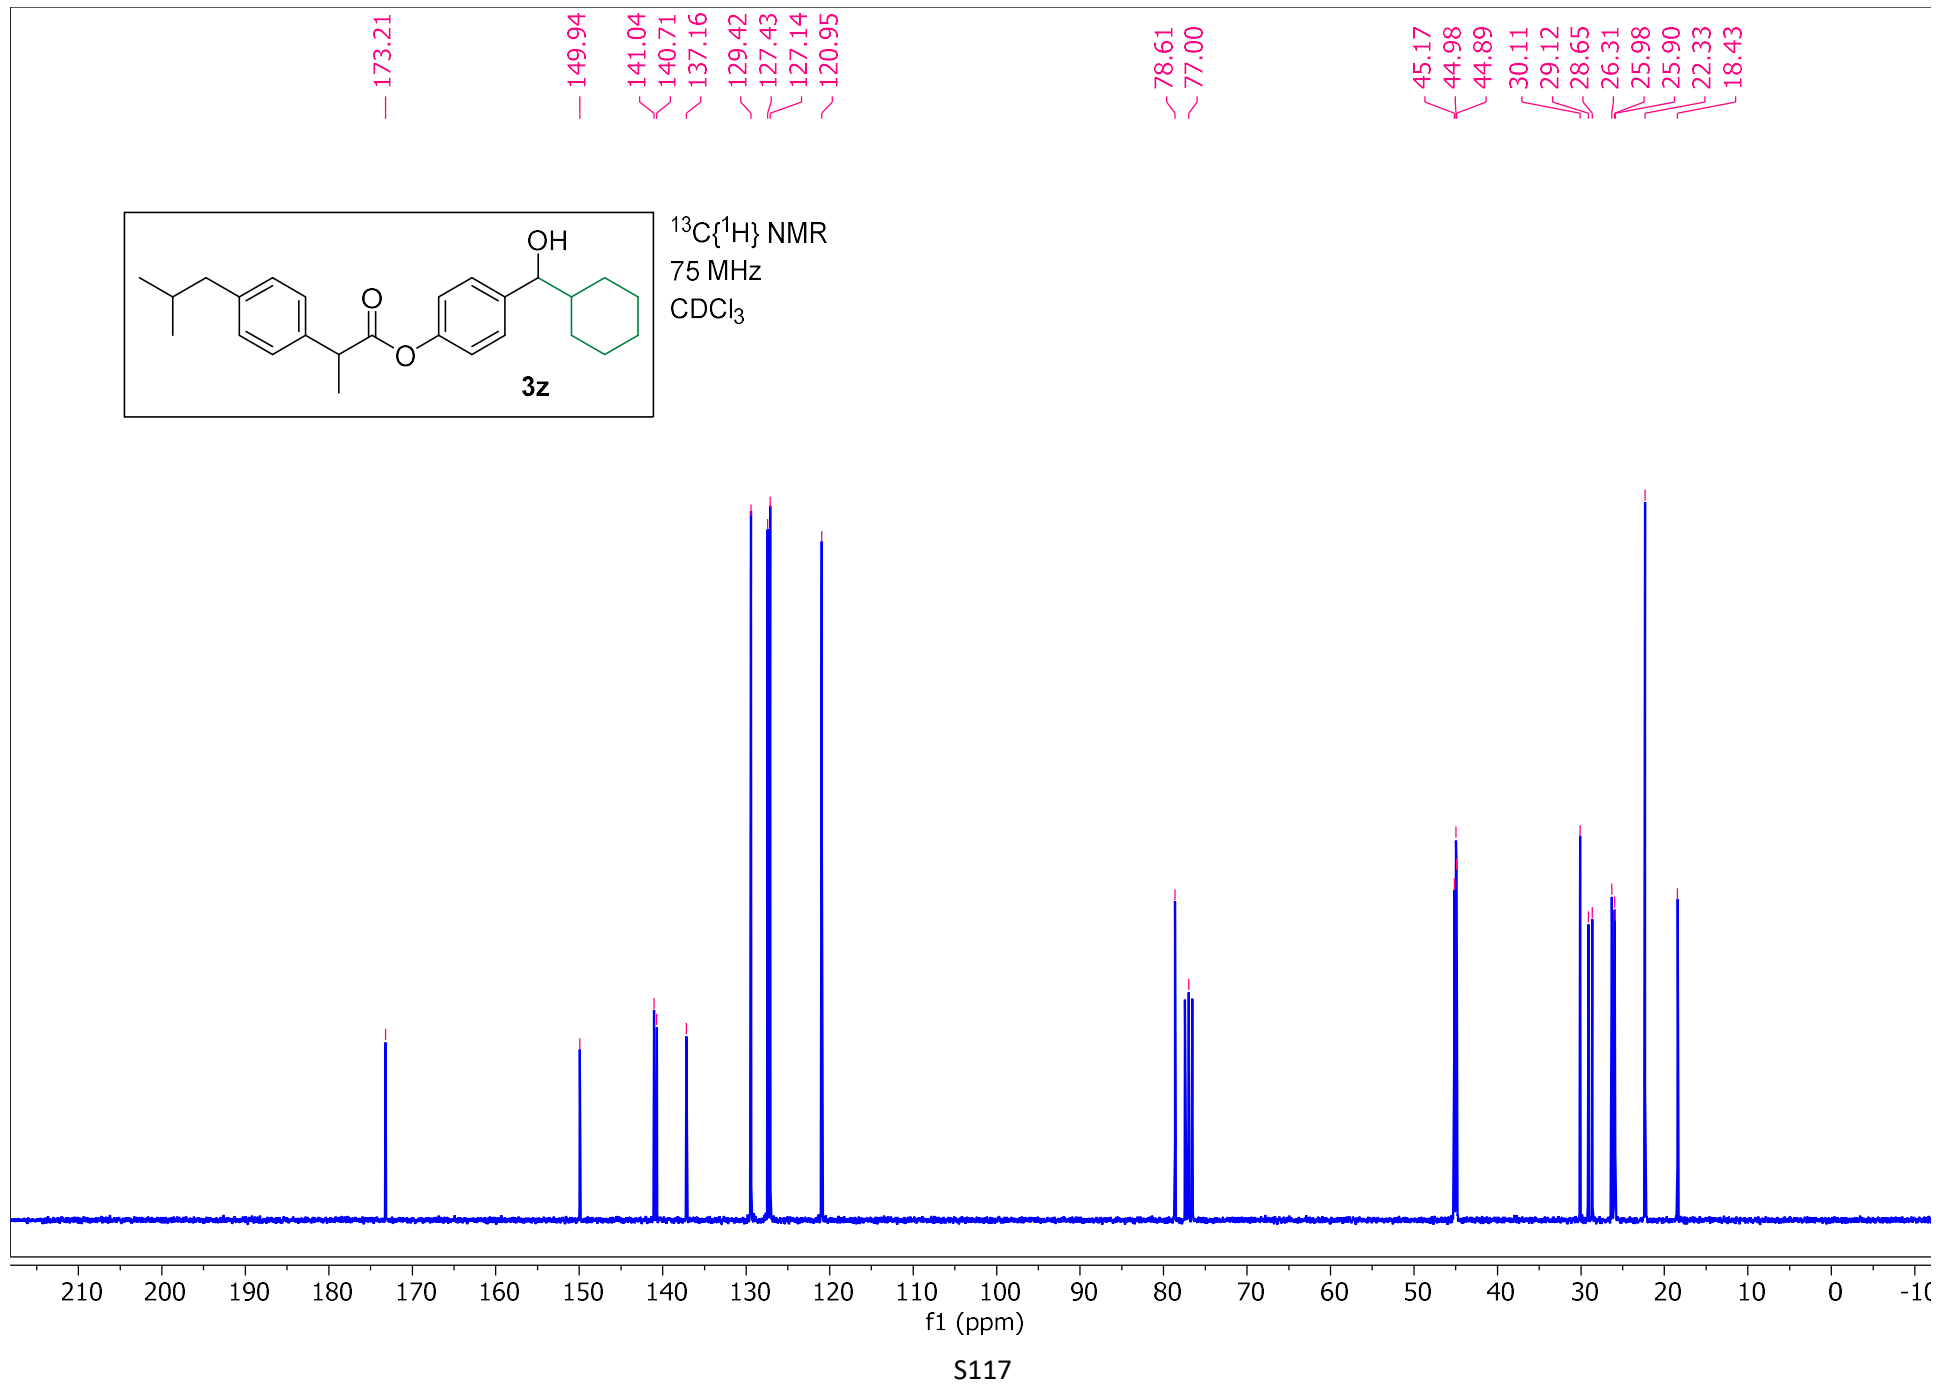

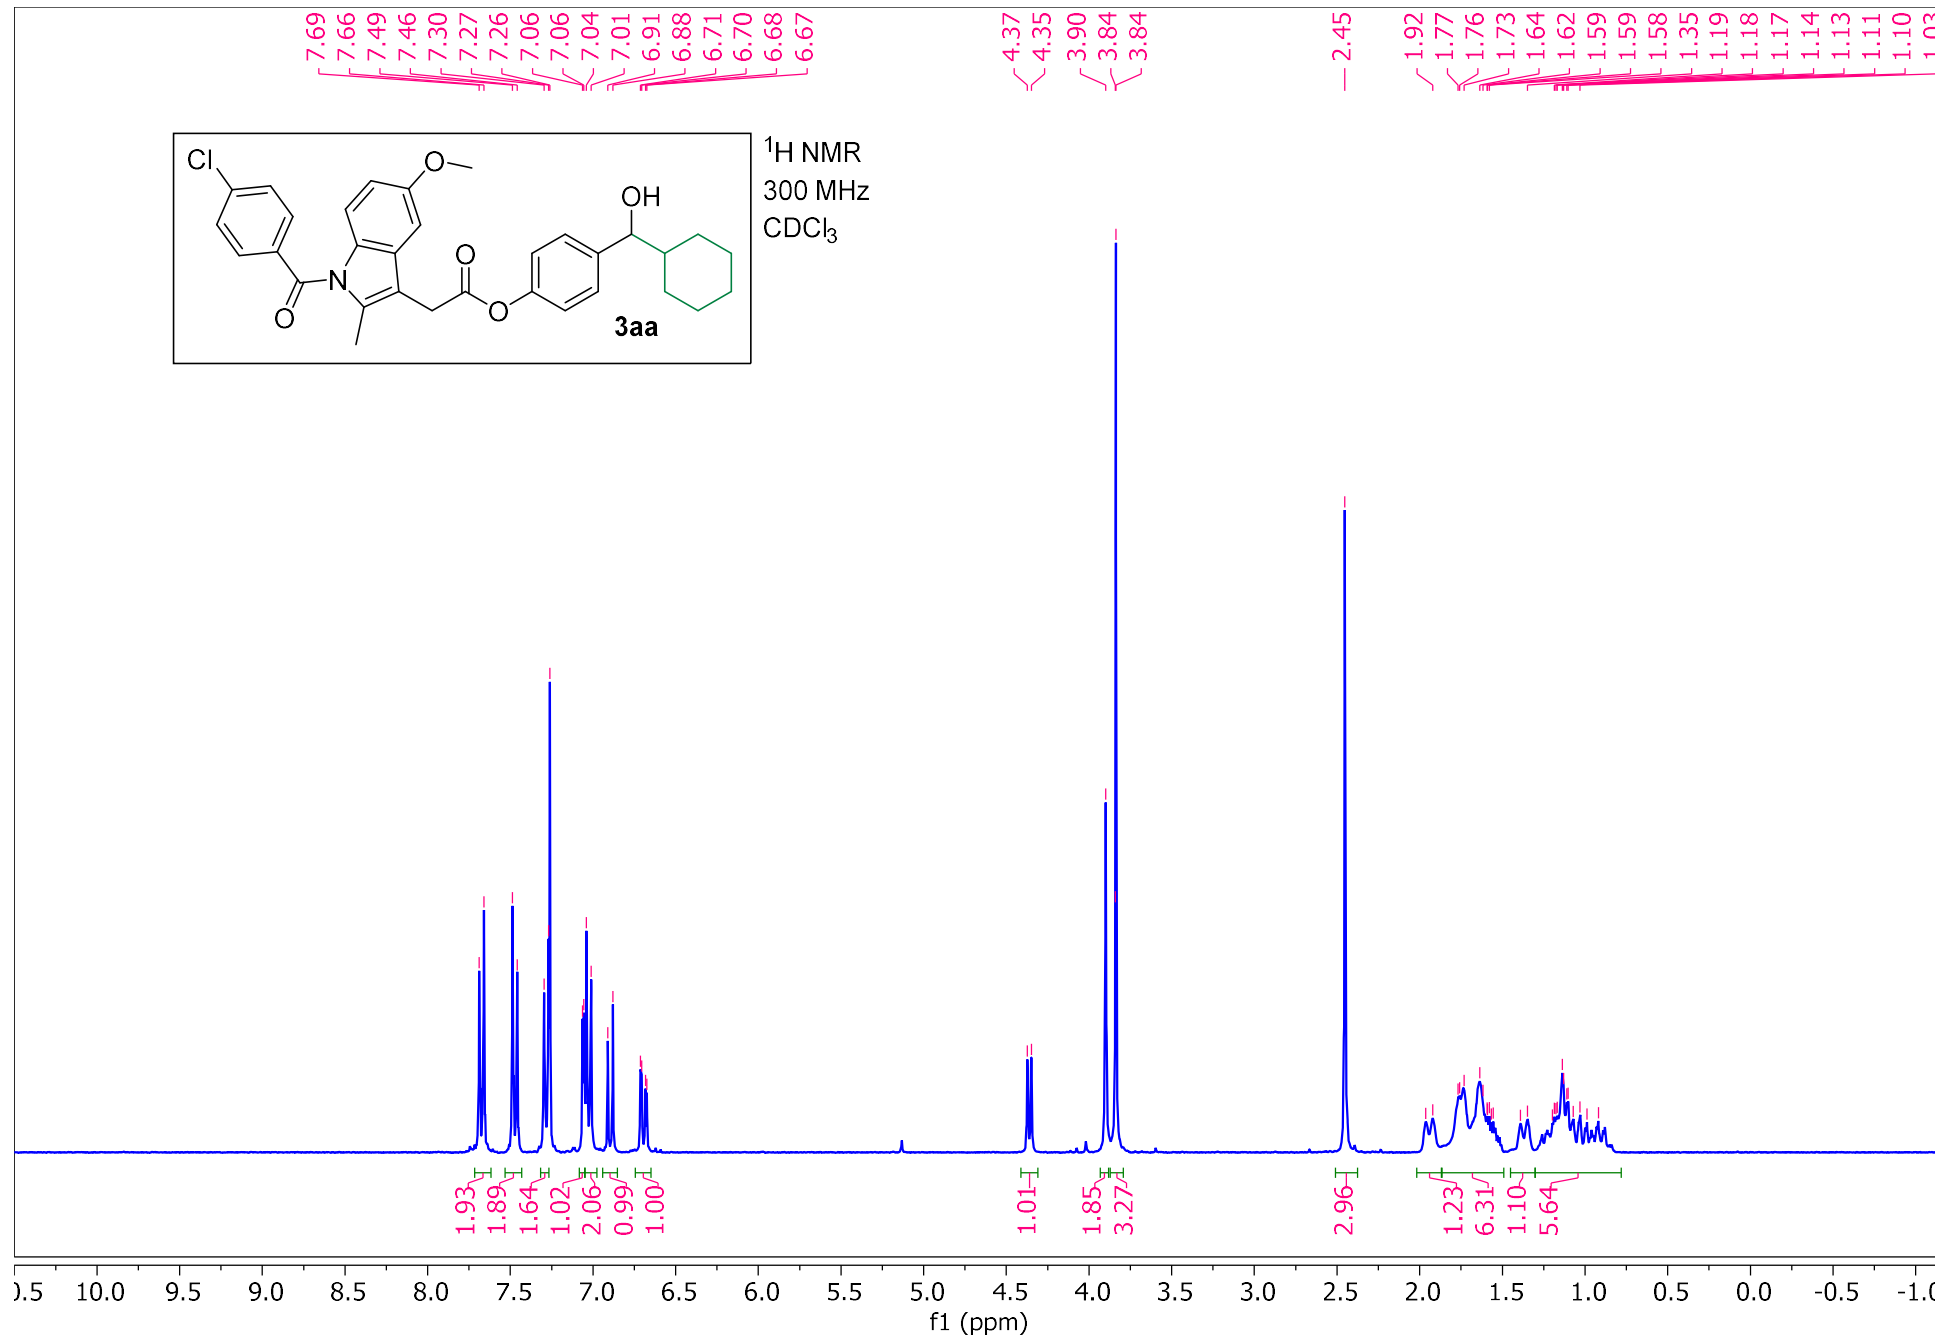

S118

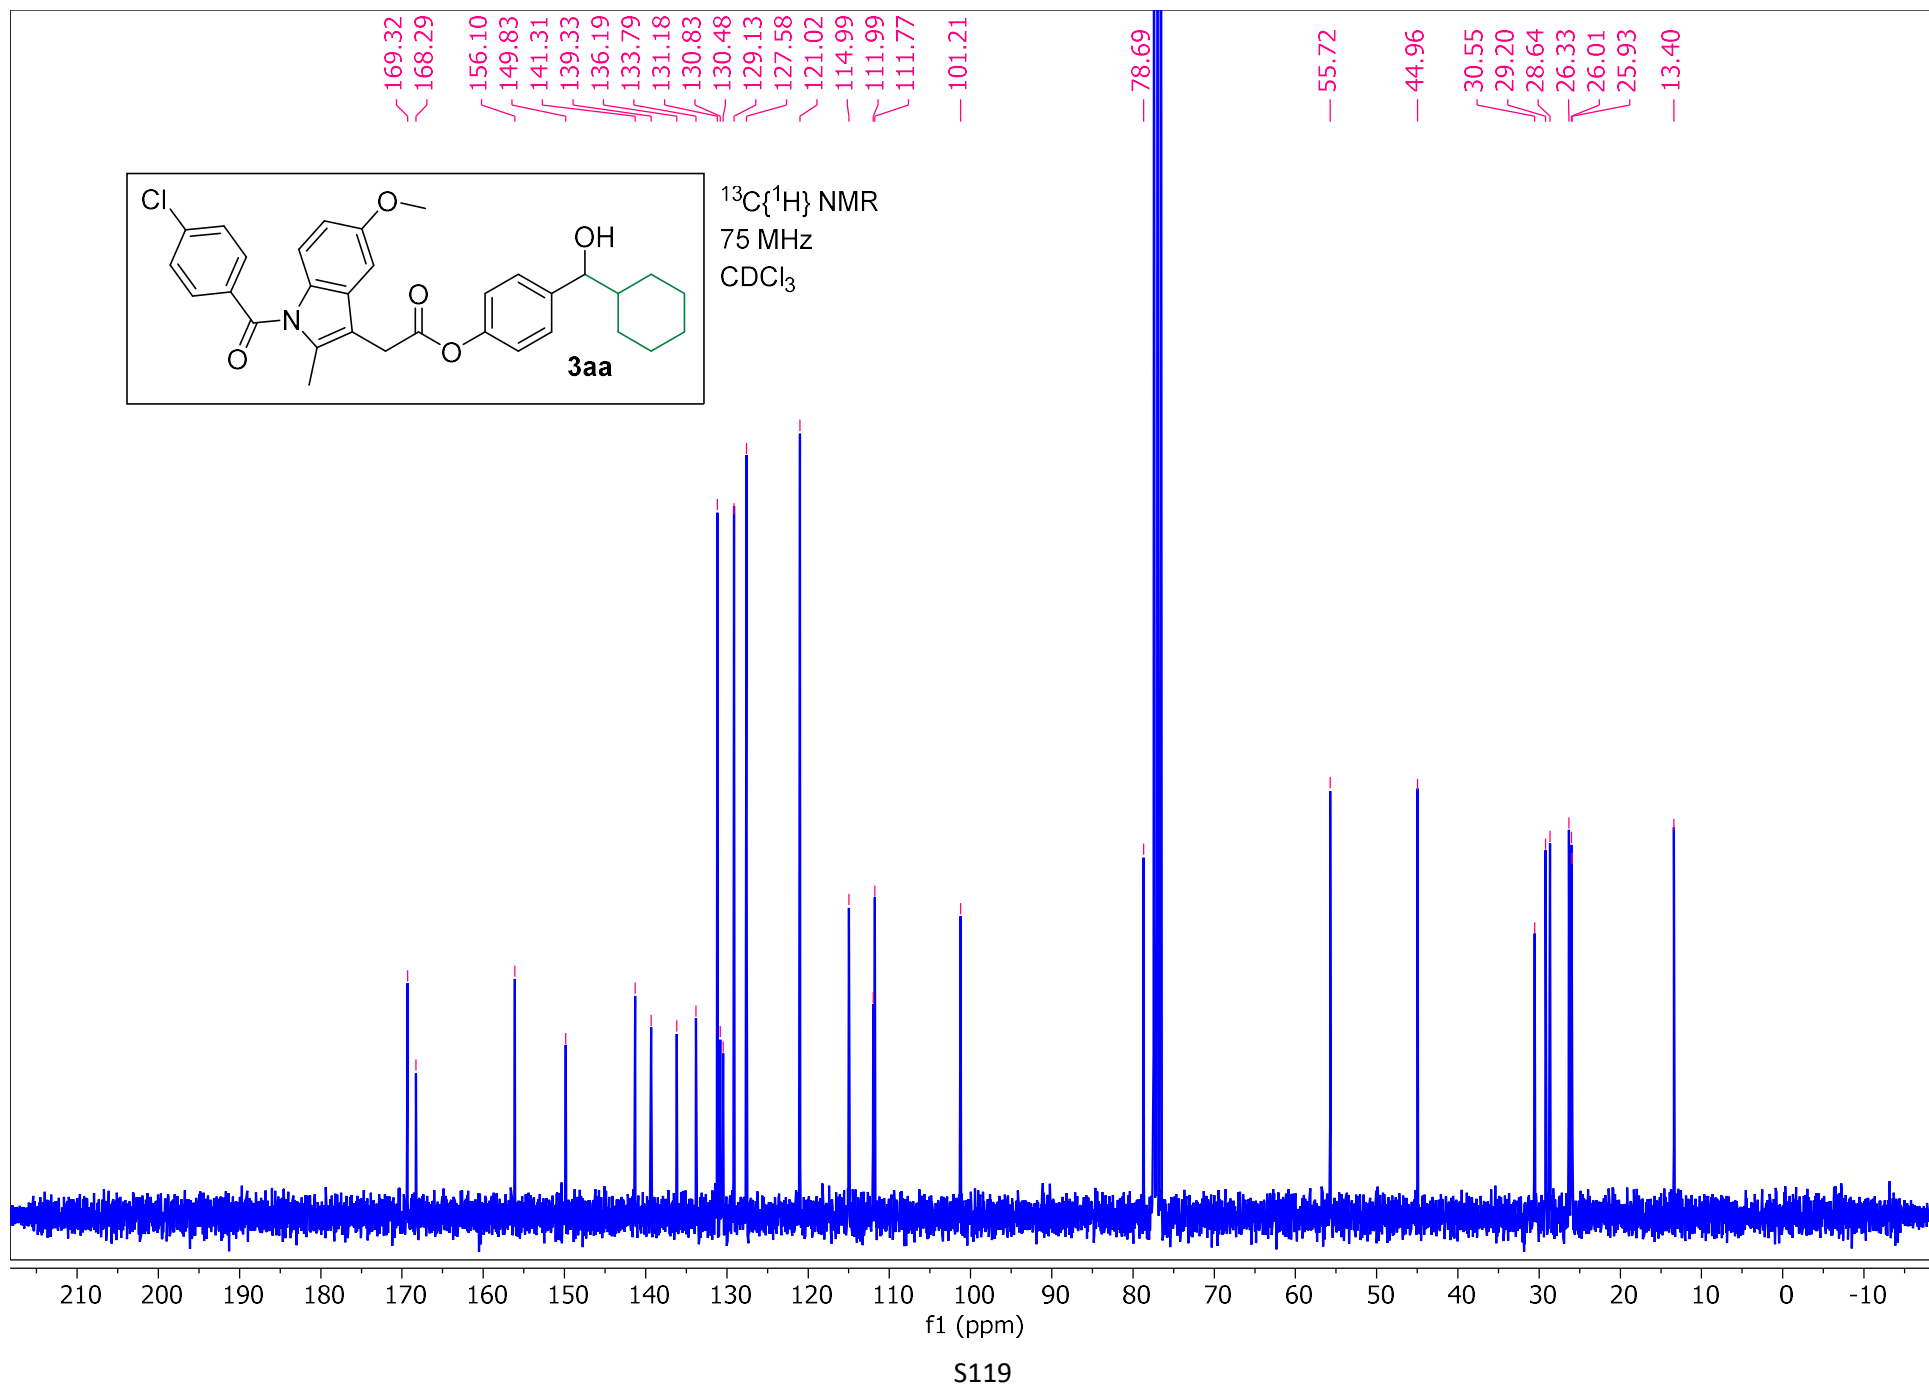

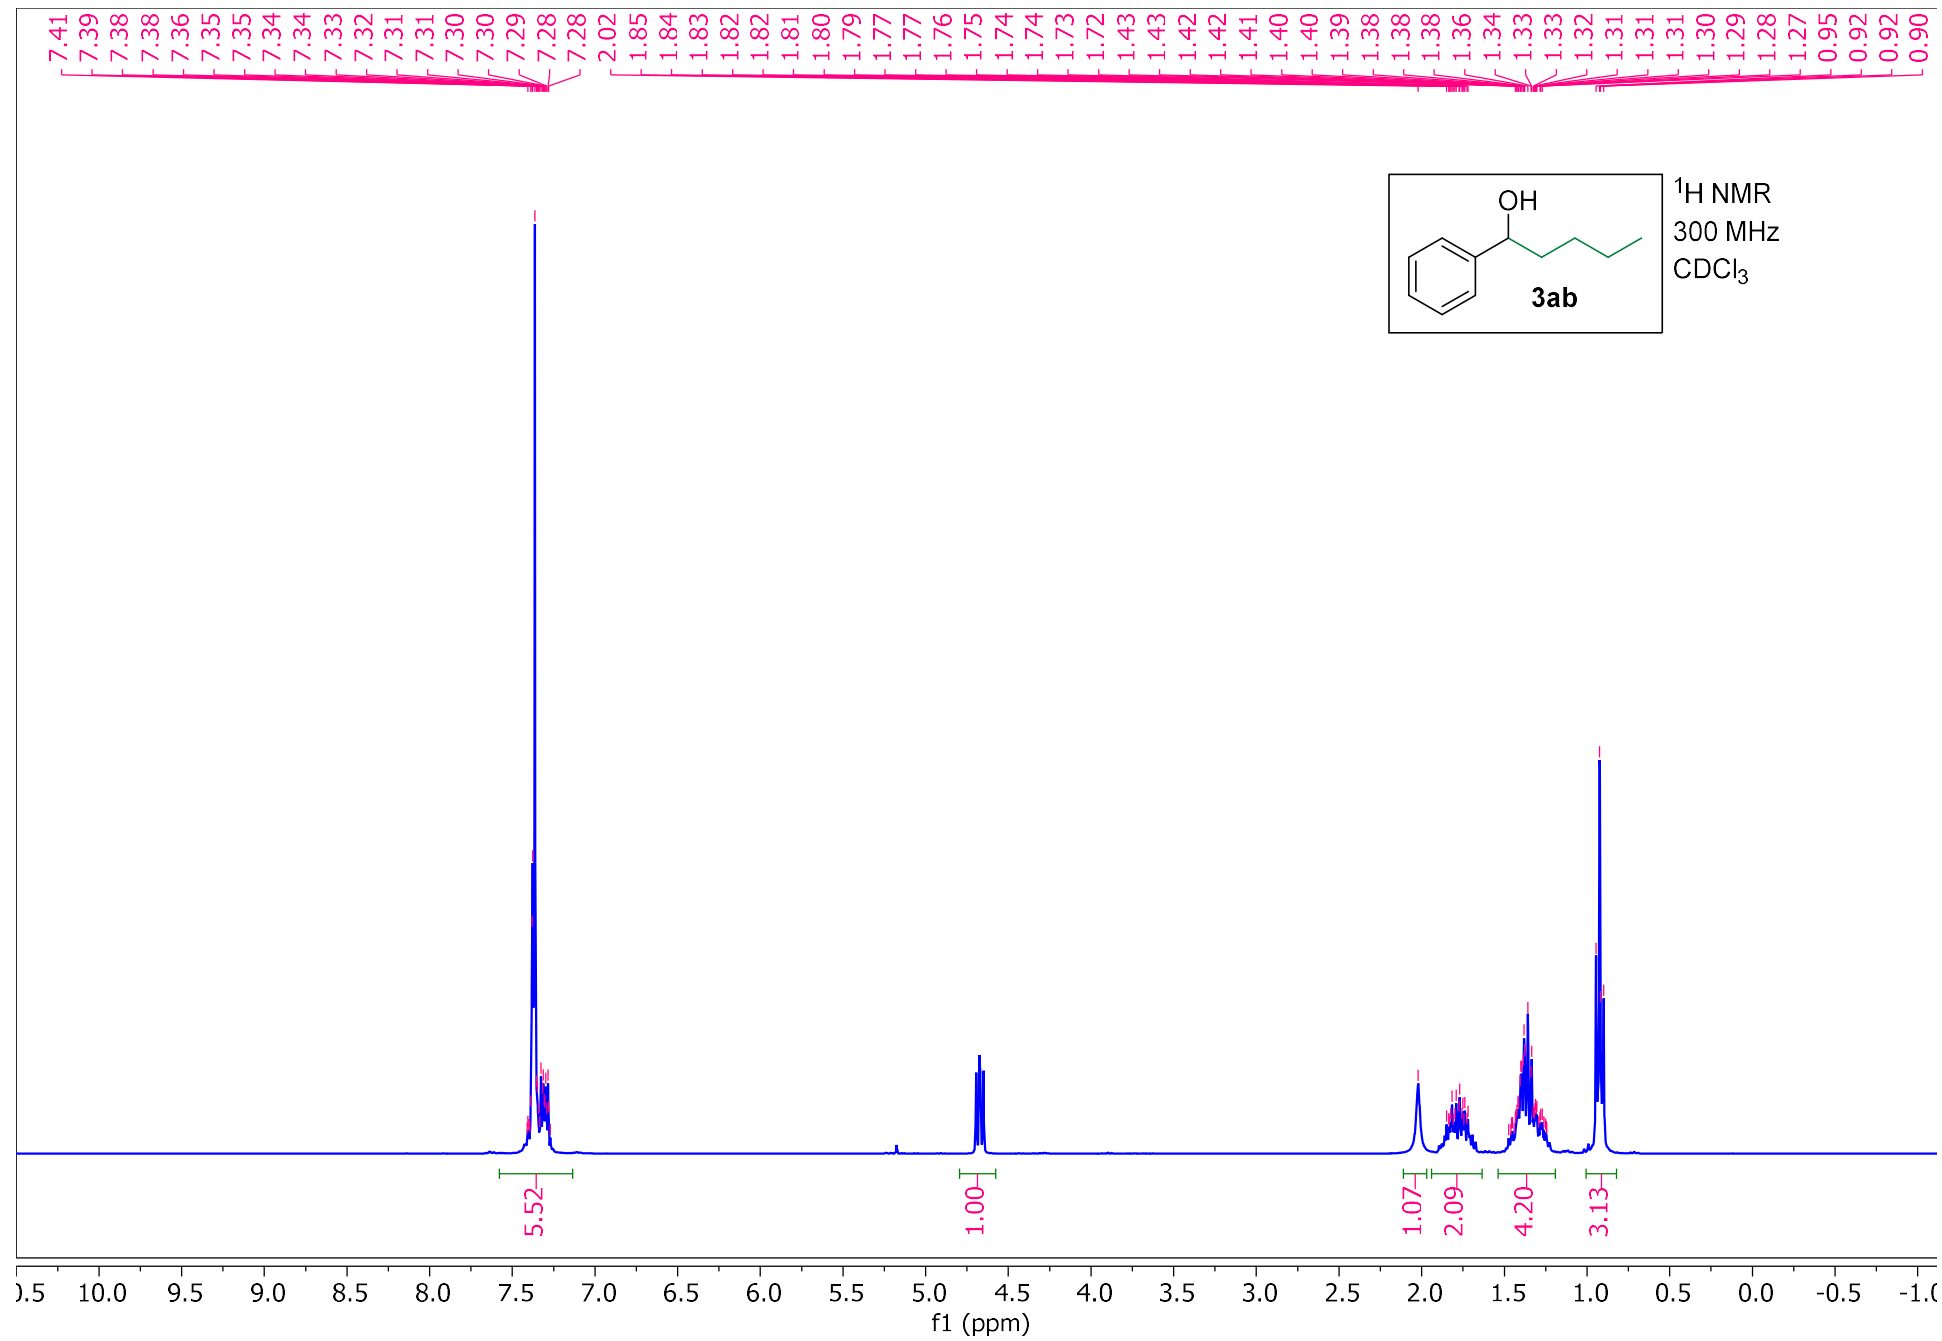

S120



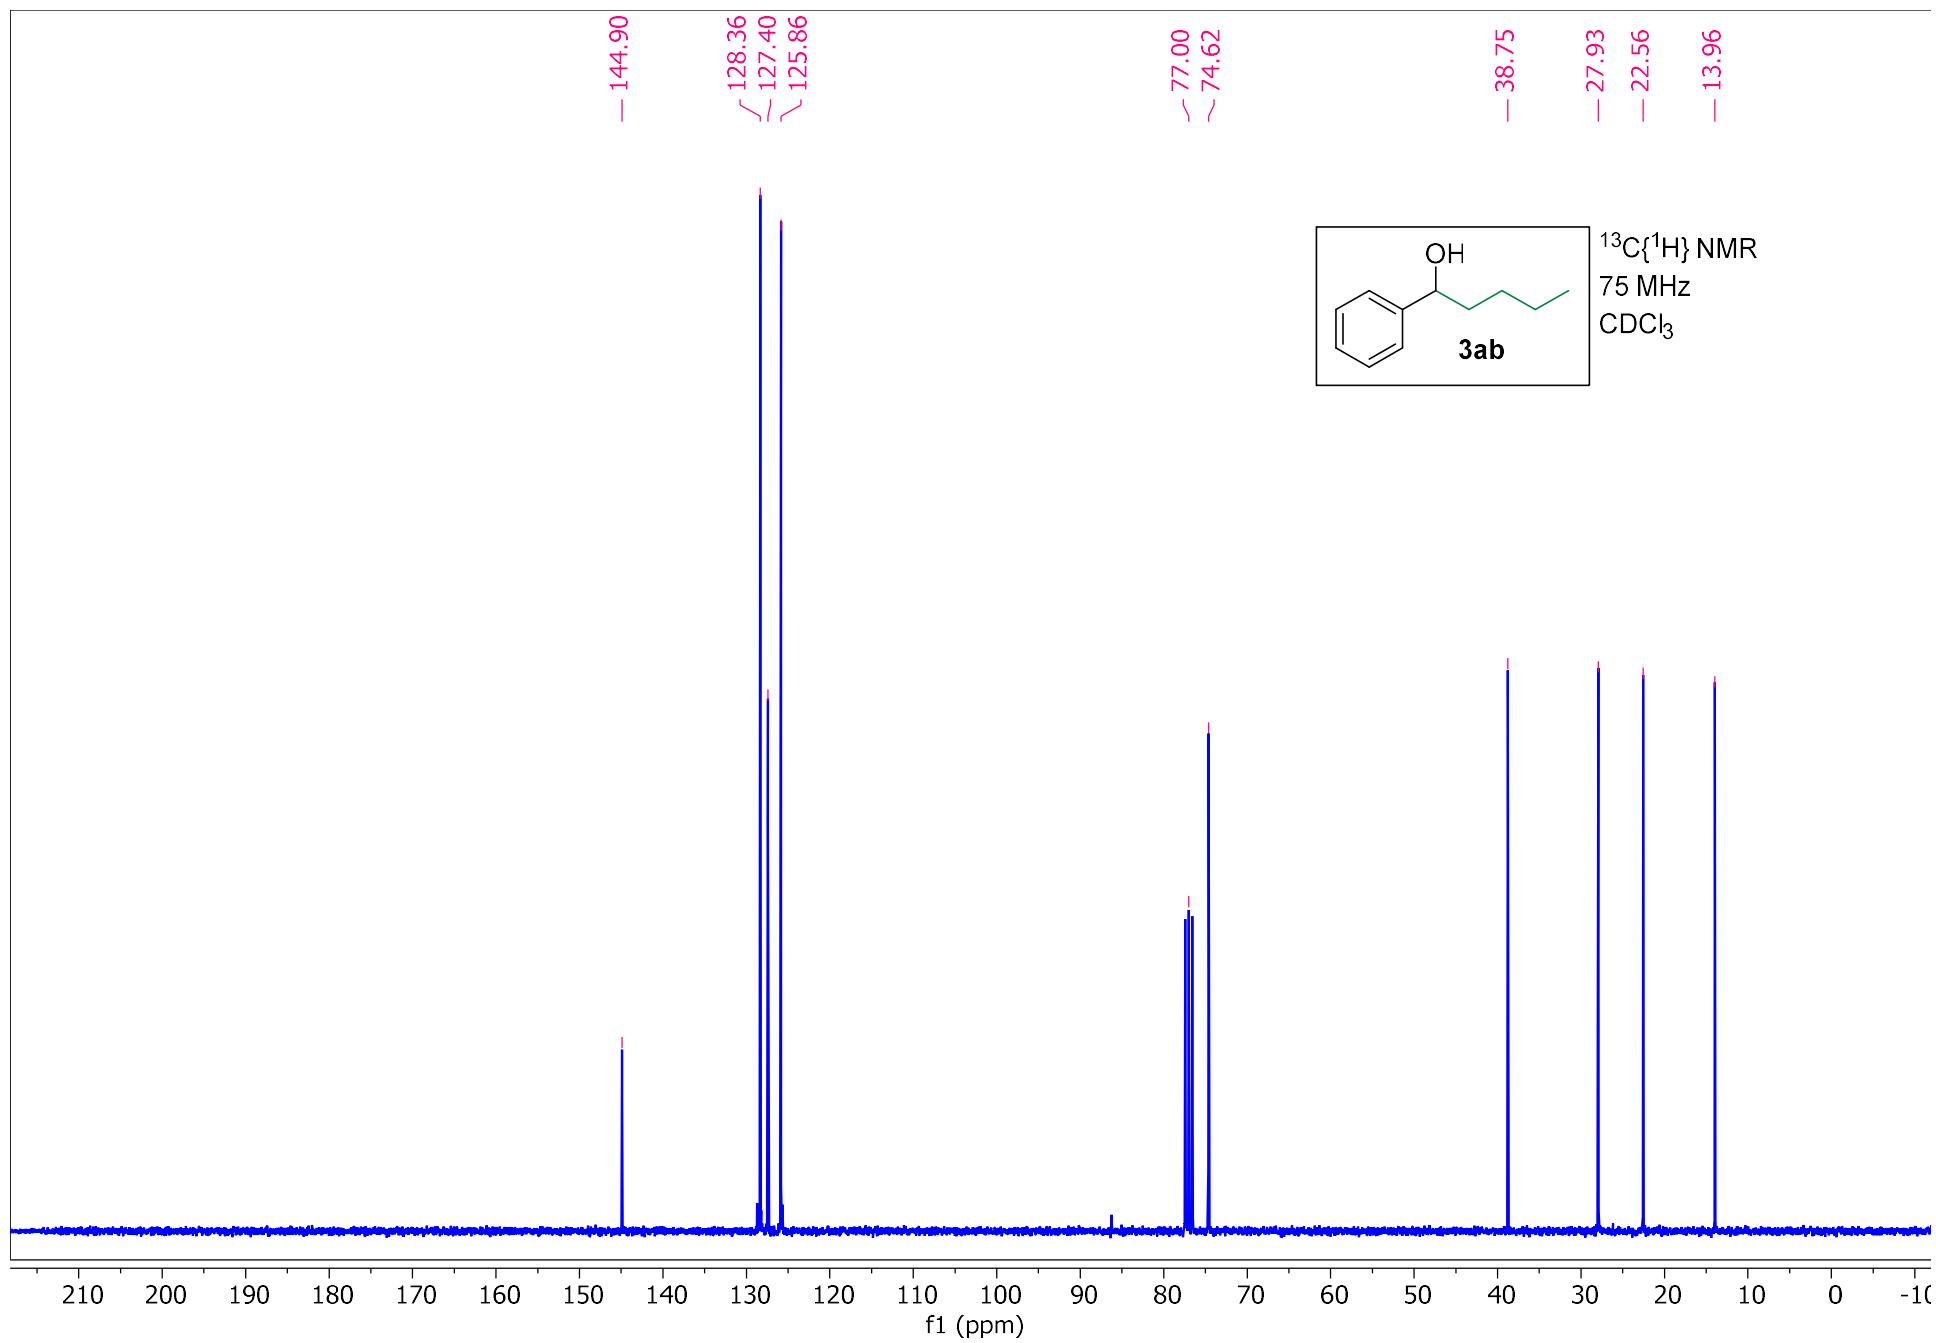

S121

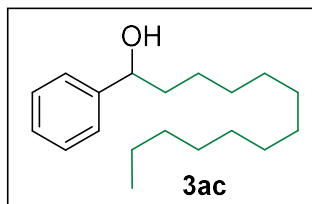

<sup>1</sup>H NMR  
300 MHz  
CDCl<sub>3</sub>

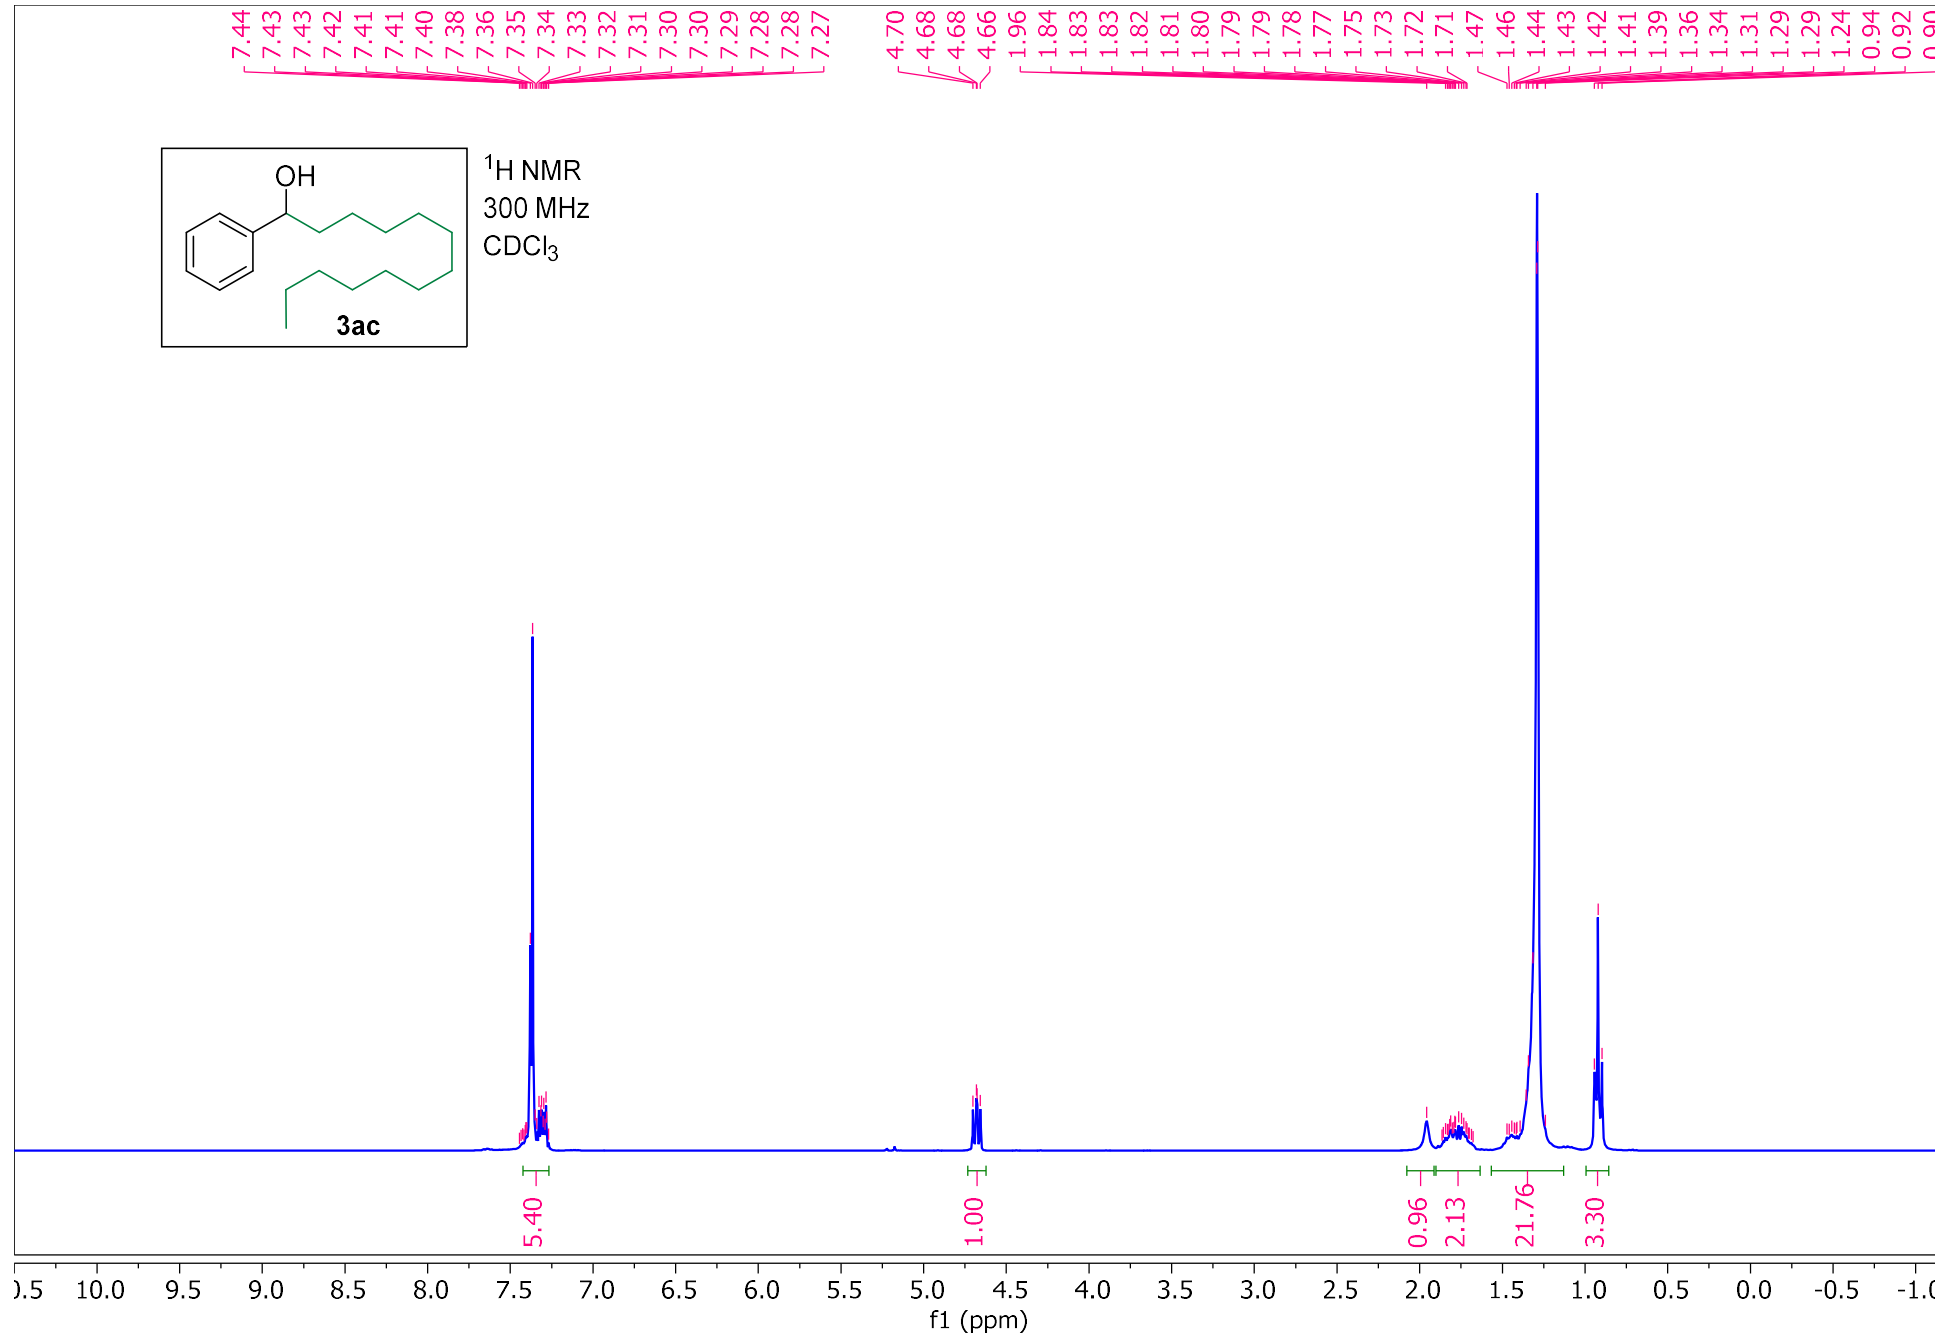

S122

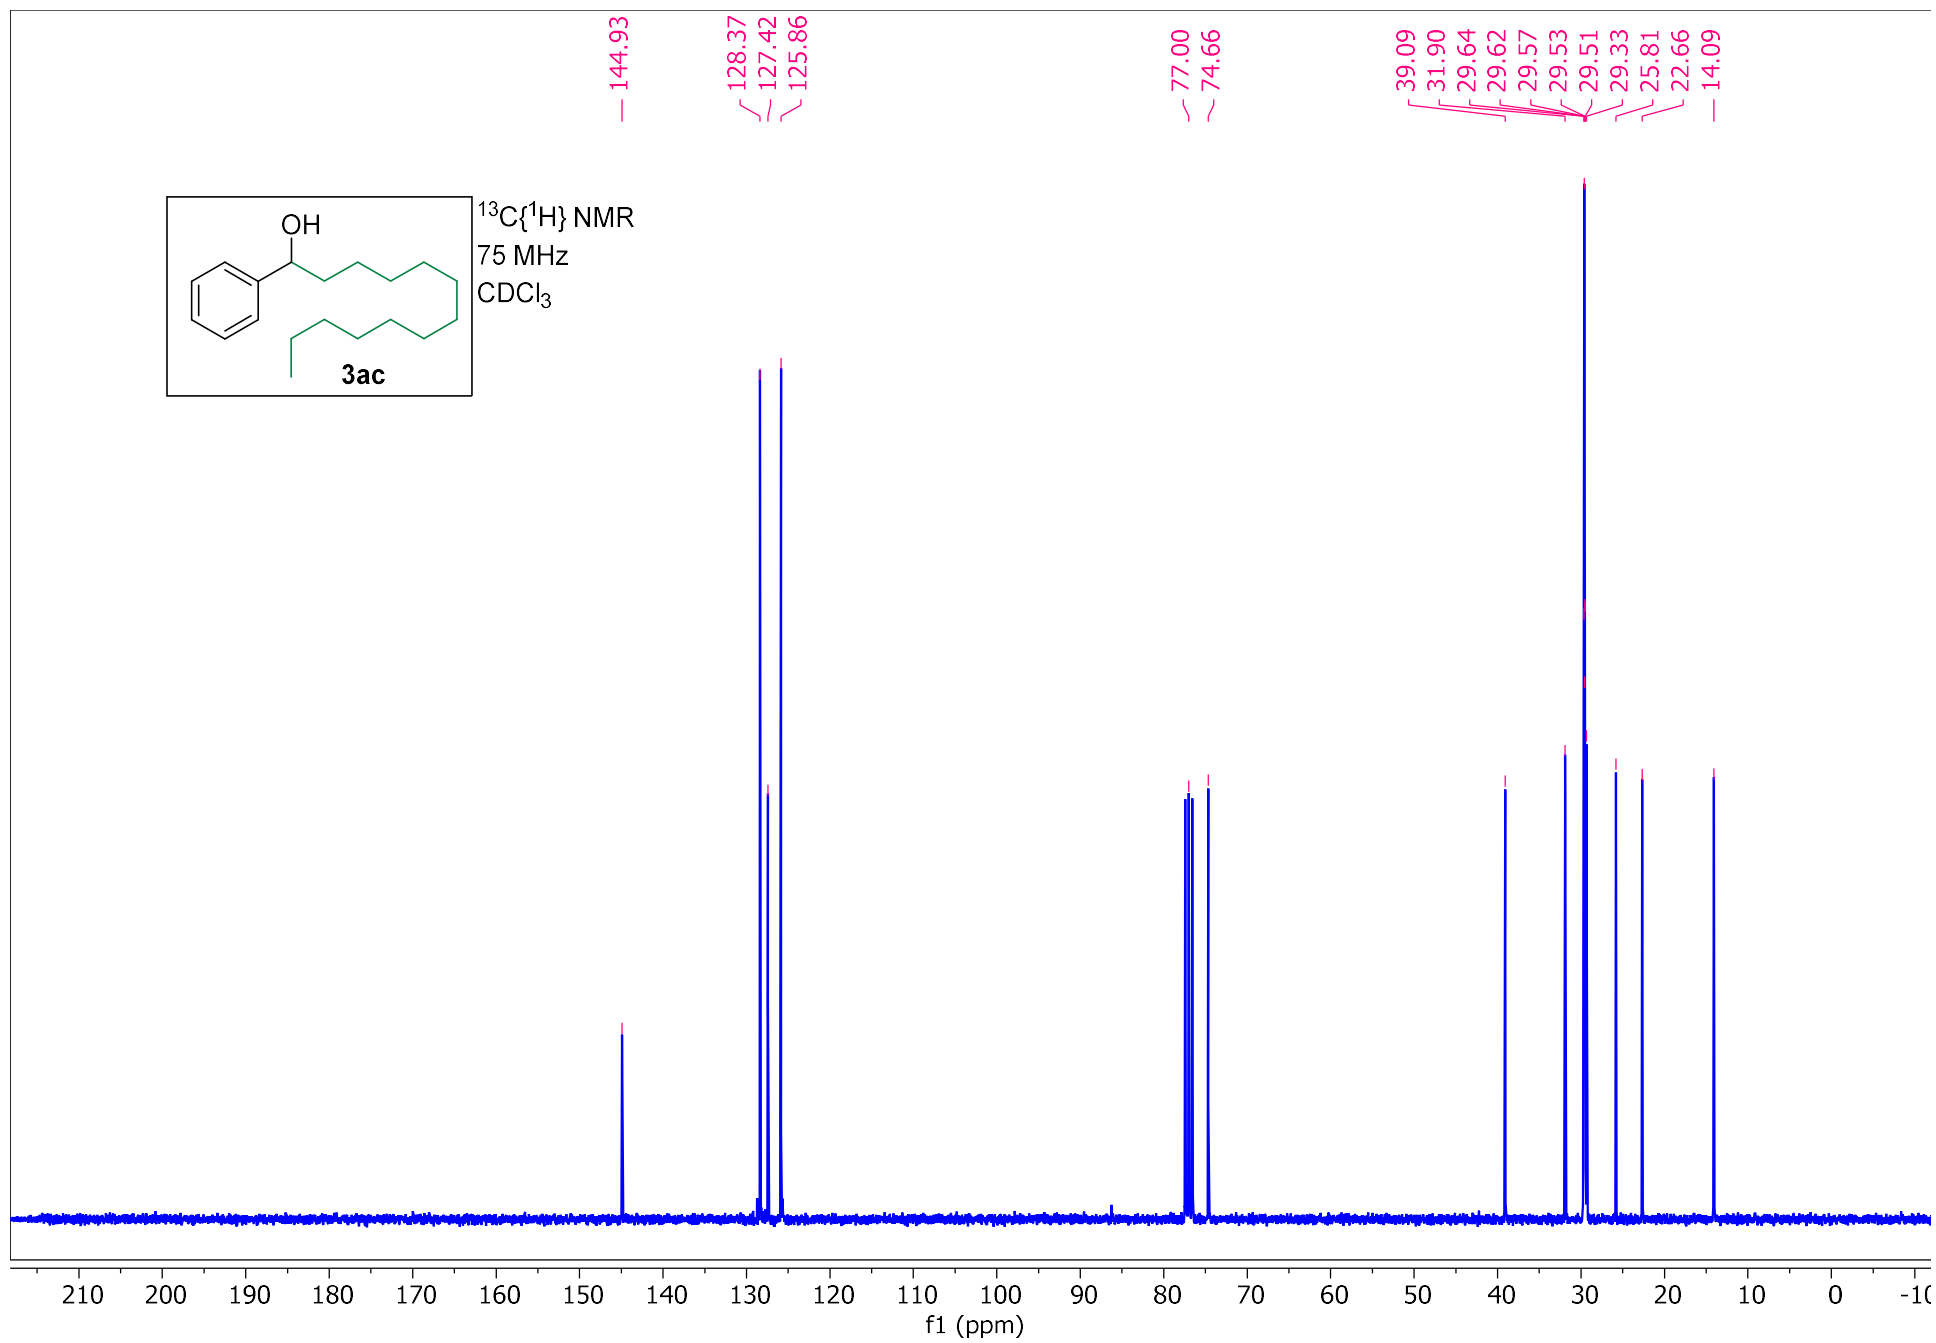

S123

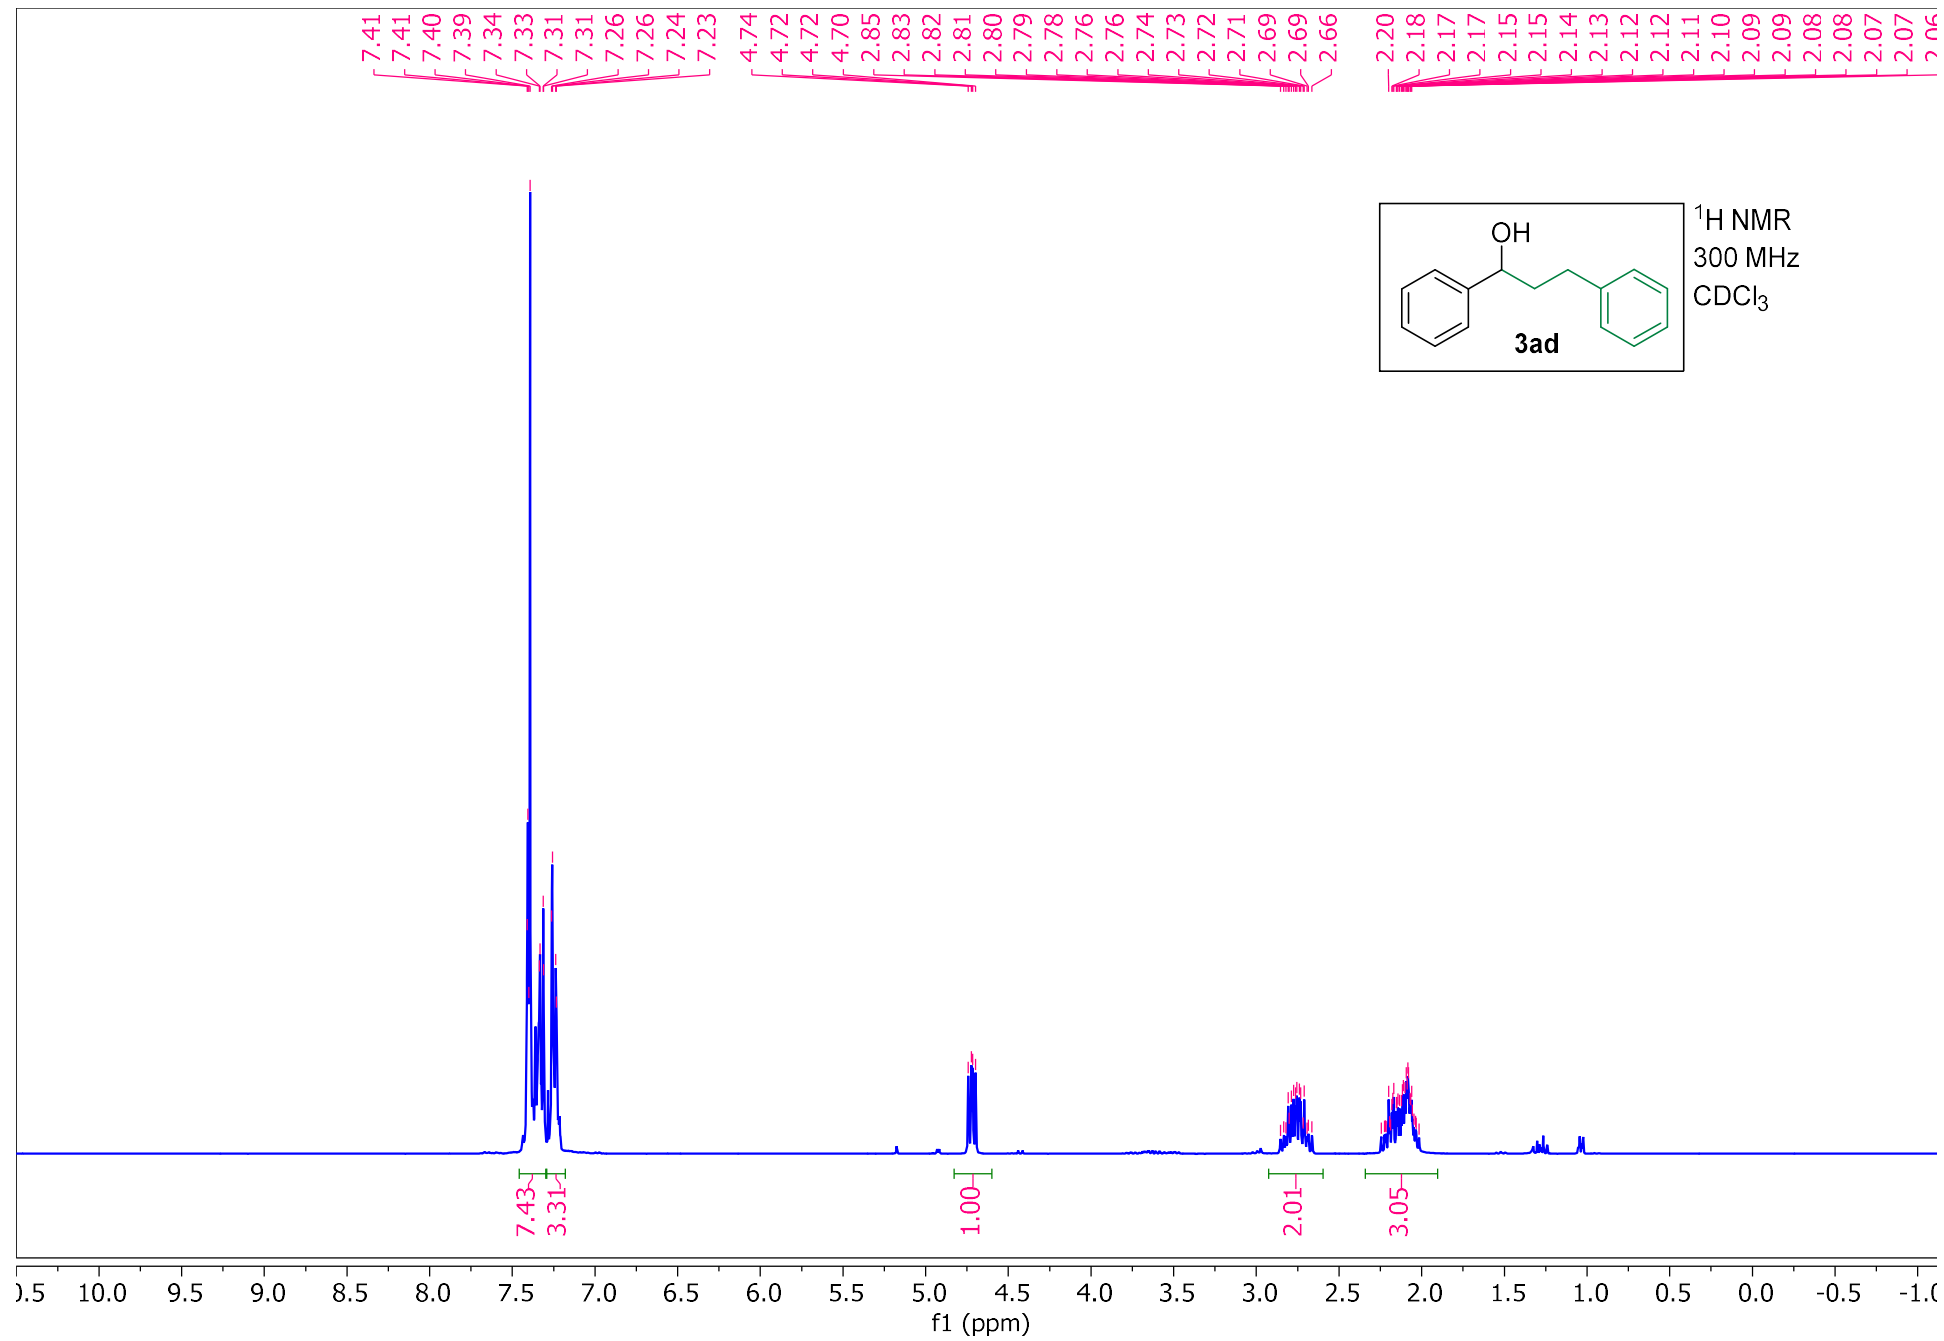

S124

144.52  
141.73  
128.72  
128.46  
128.39  
128.34  
128.25  
128.07  
127.58  
126.23  
125.88  
125.80  
125.68

77.00  
73.80

40.40

32.00

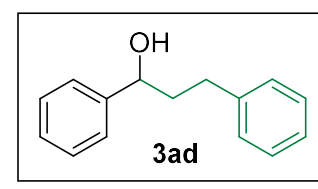

$^{13}\text{C}\{^1\text{H}\}$  NMR  
75 MHz  
 $\text{CDCl}_3$

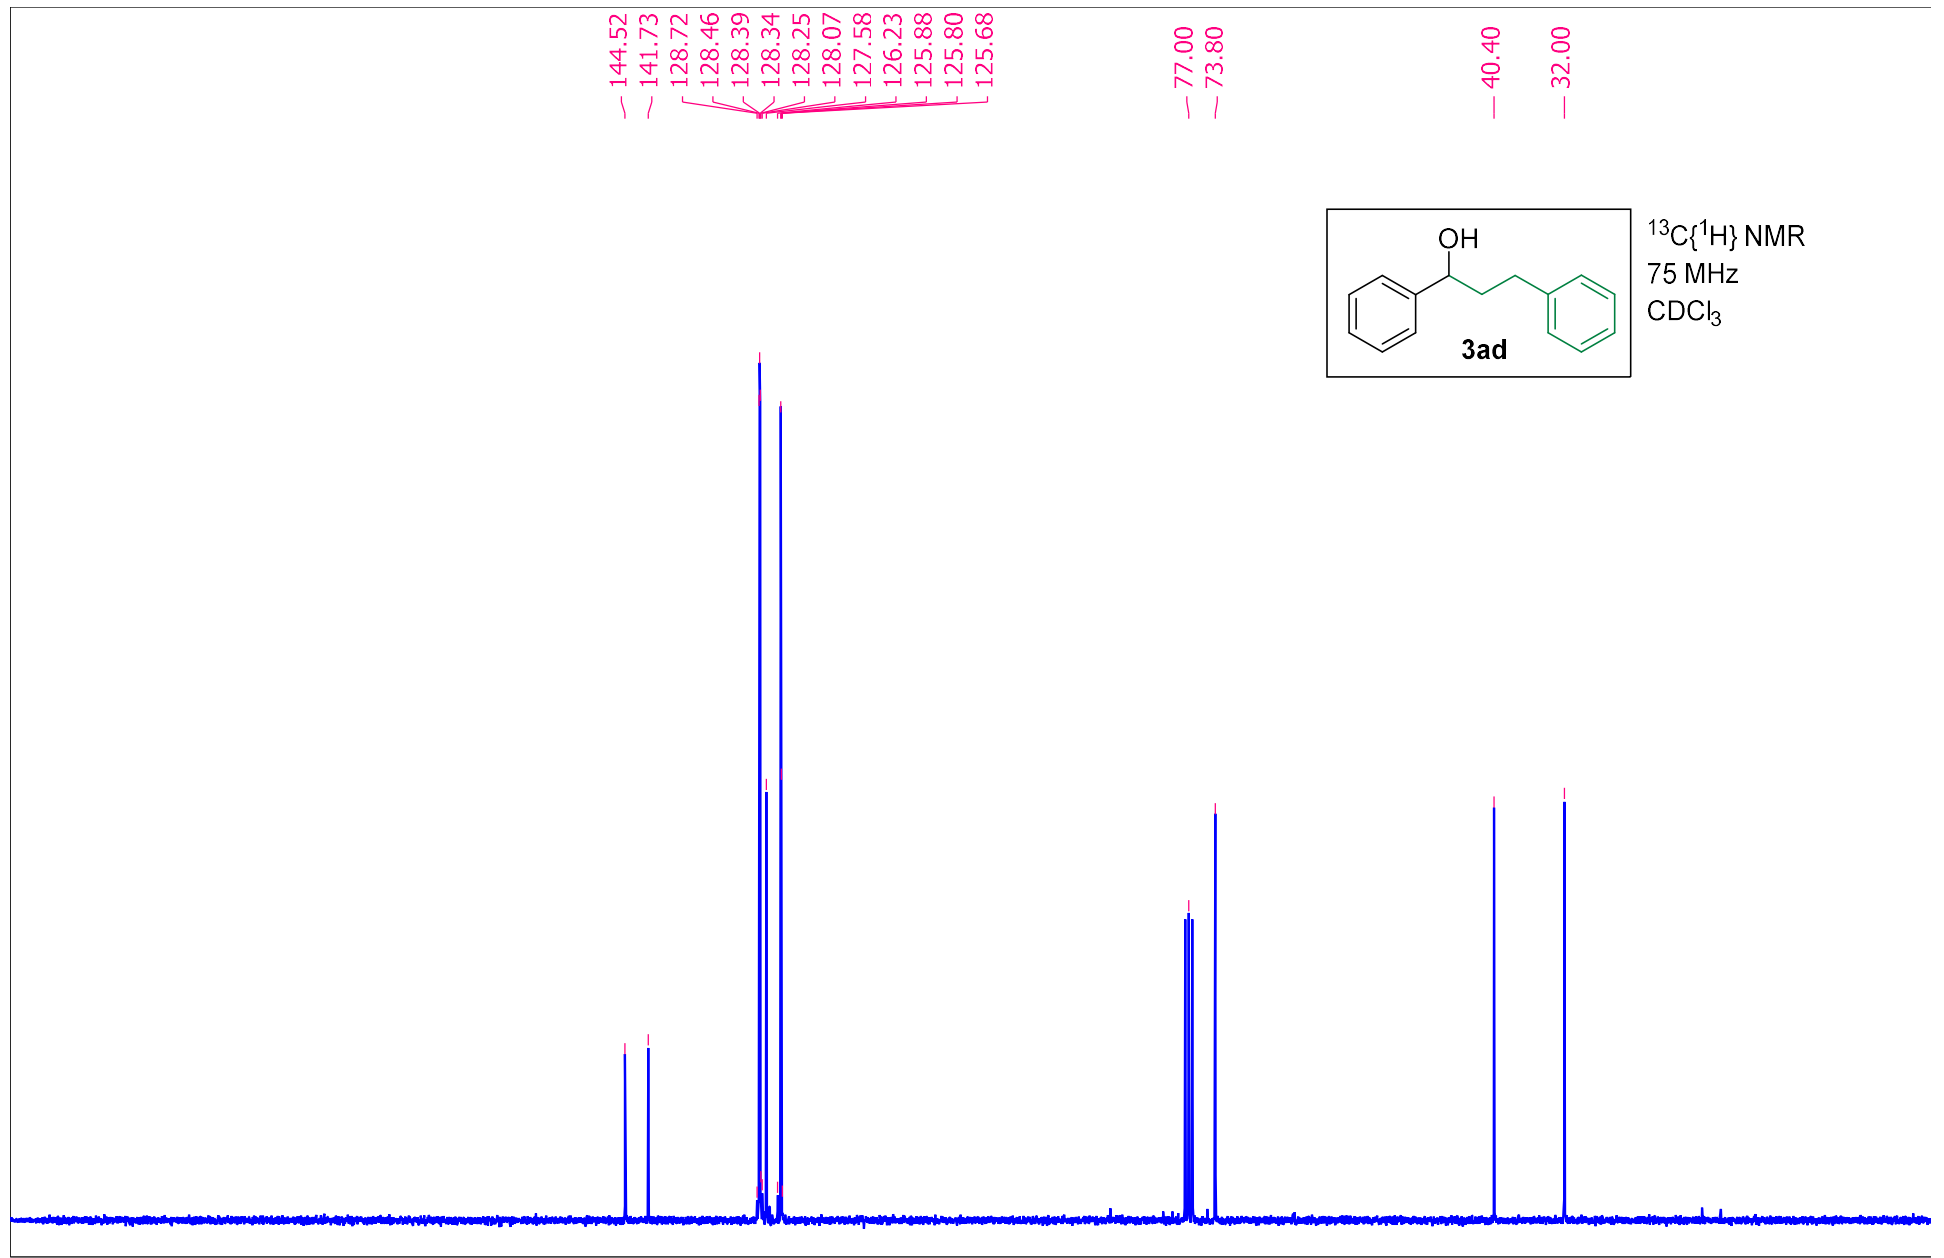

210 200 190 180 170 160 150 140 130 120 110 100 90 80 70 60 50 40 30 20 10 0 -10

f1 (ppm)  
S125

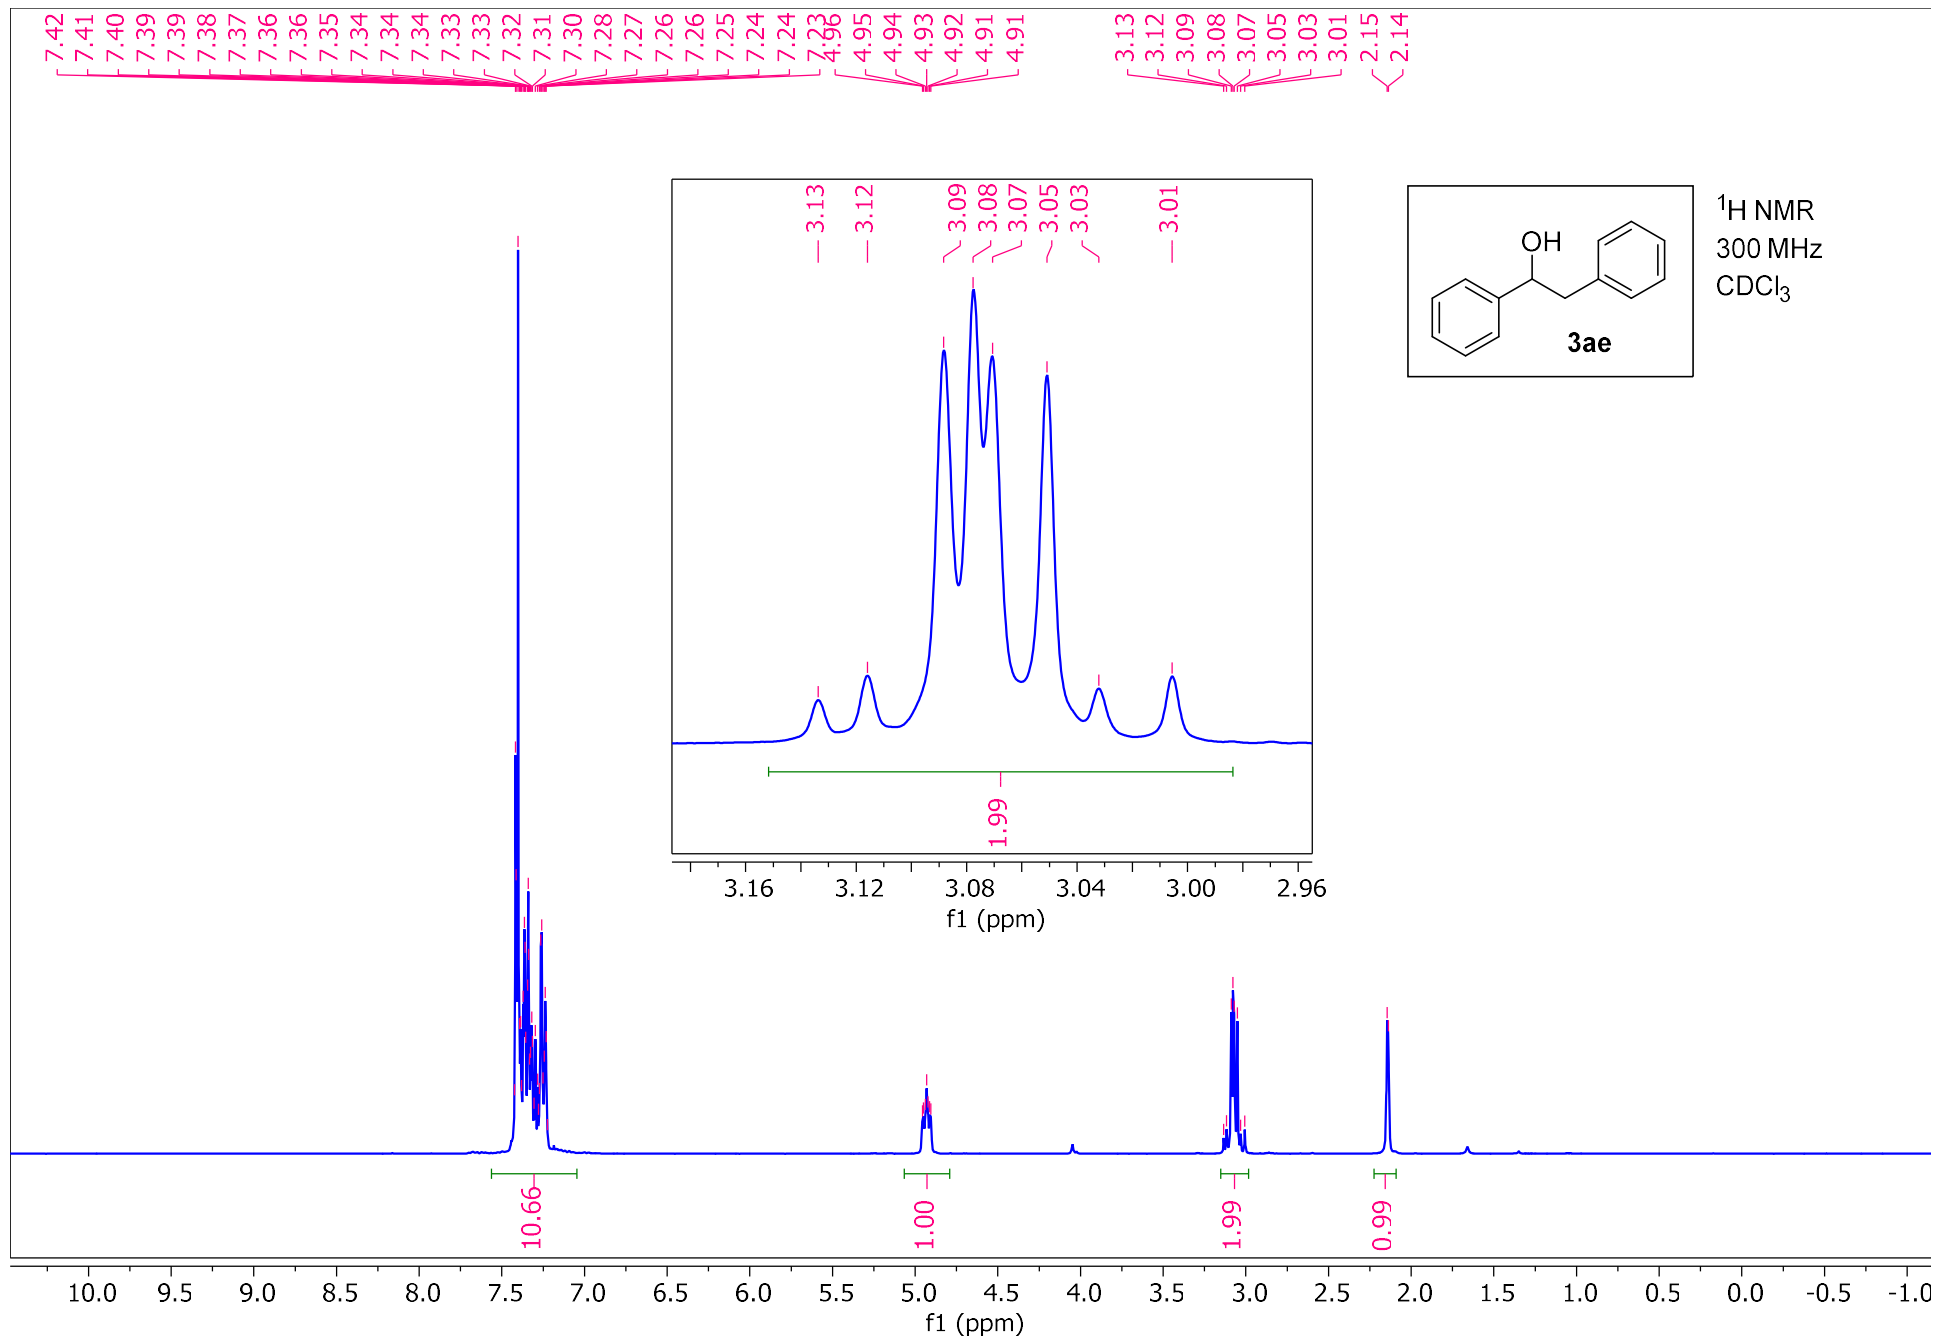

S126

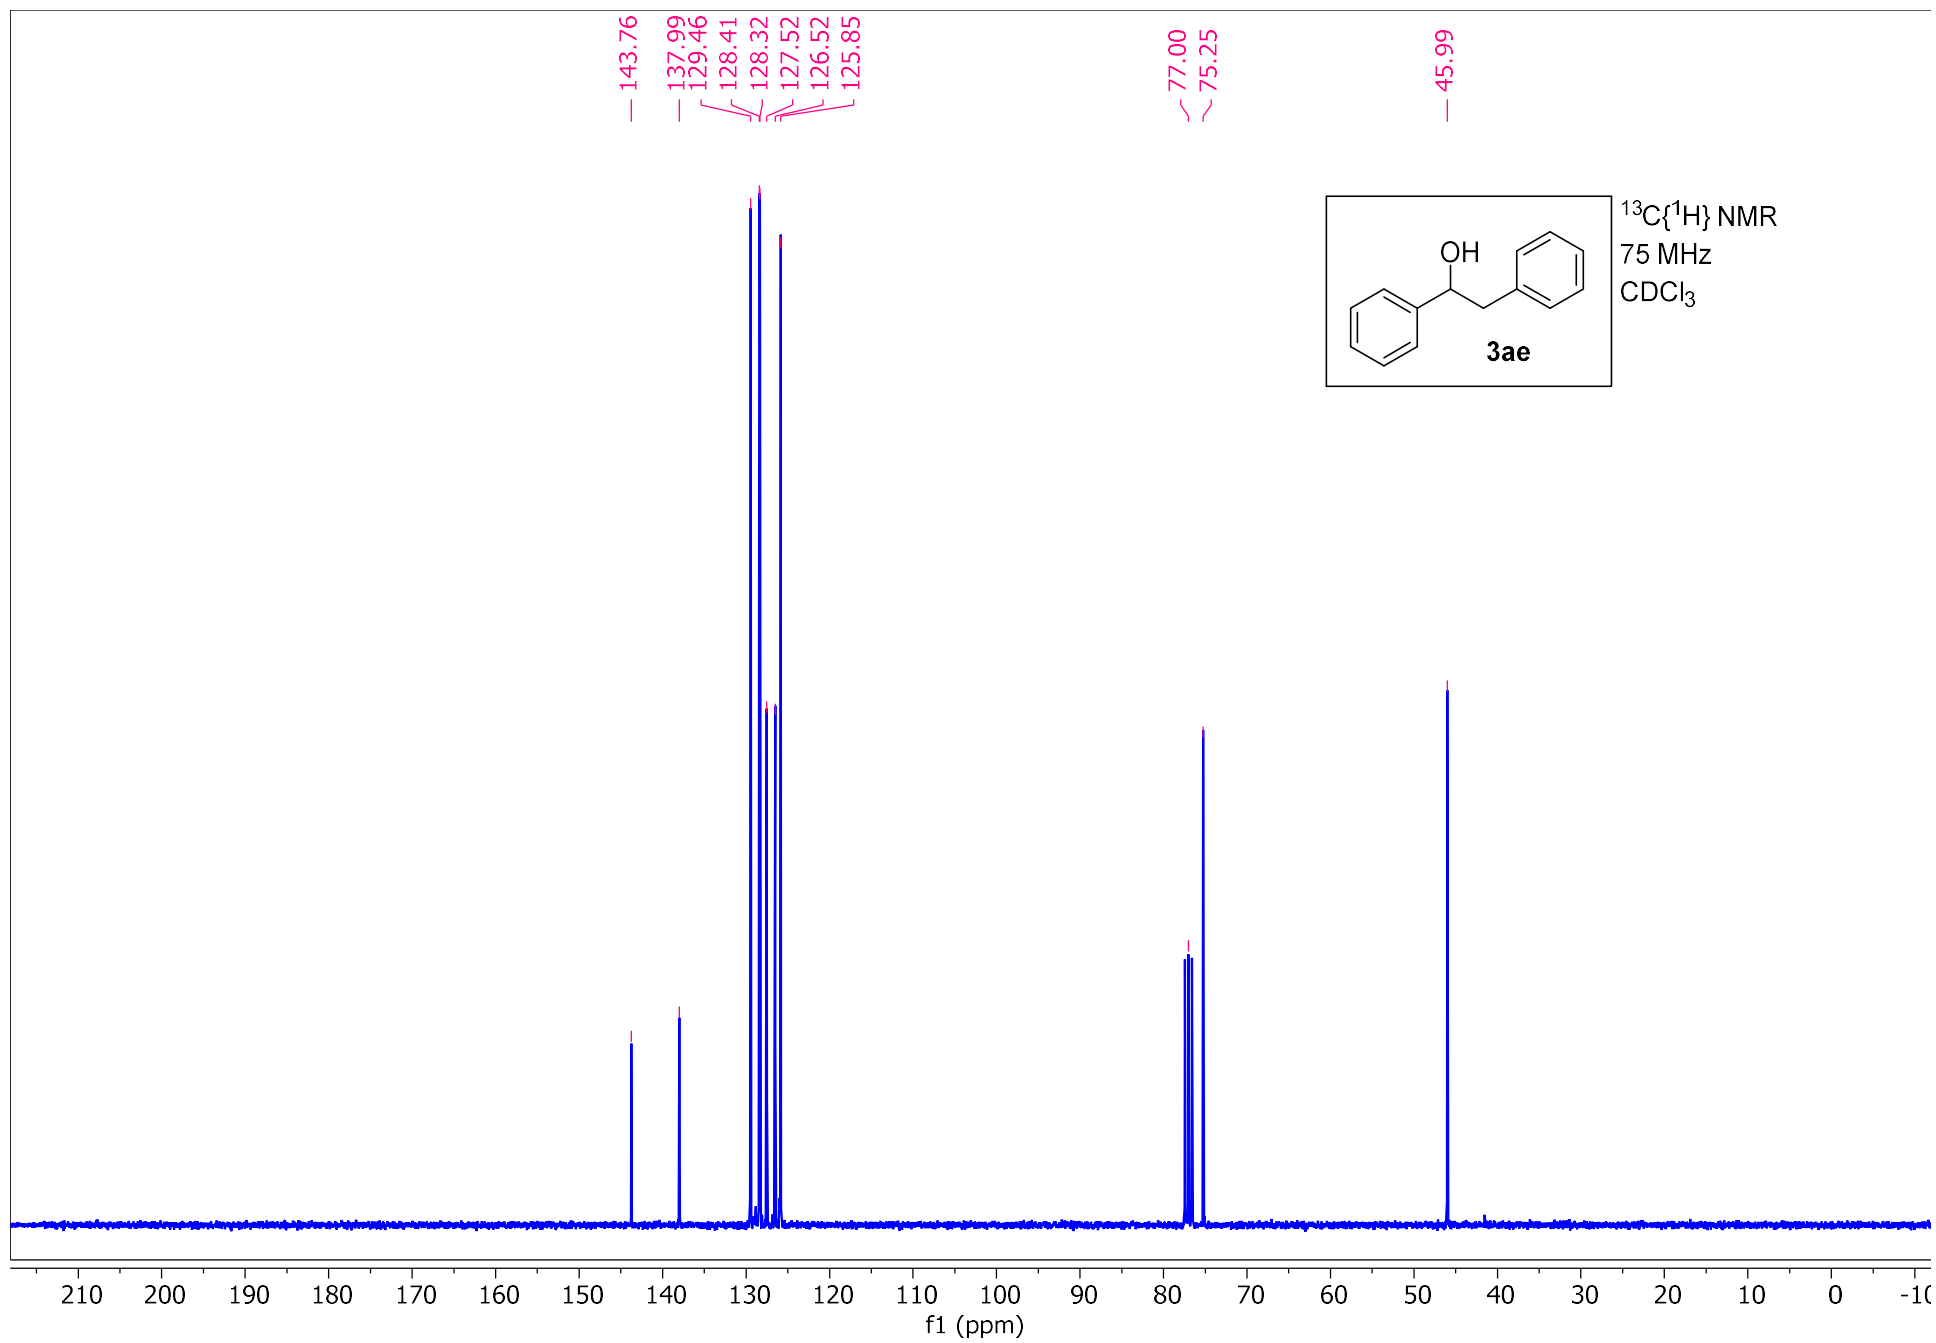

S127

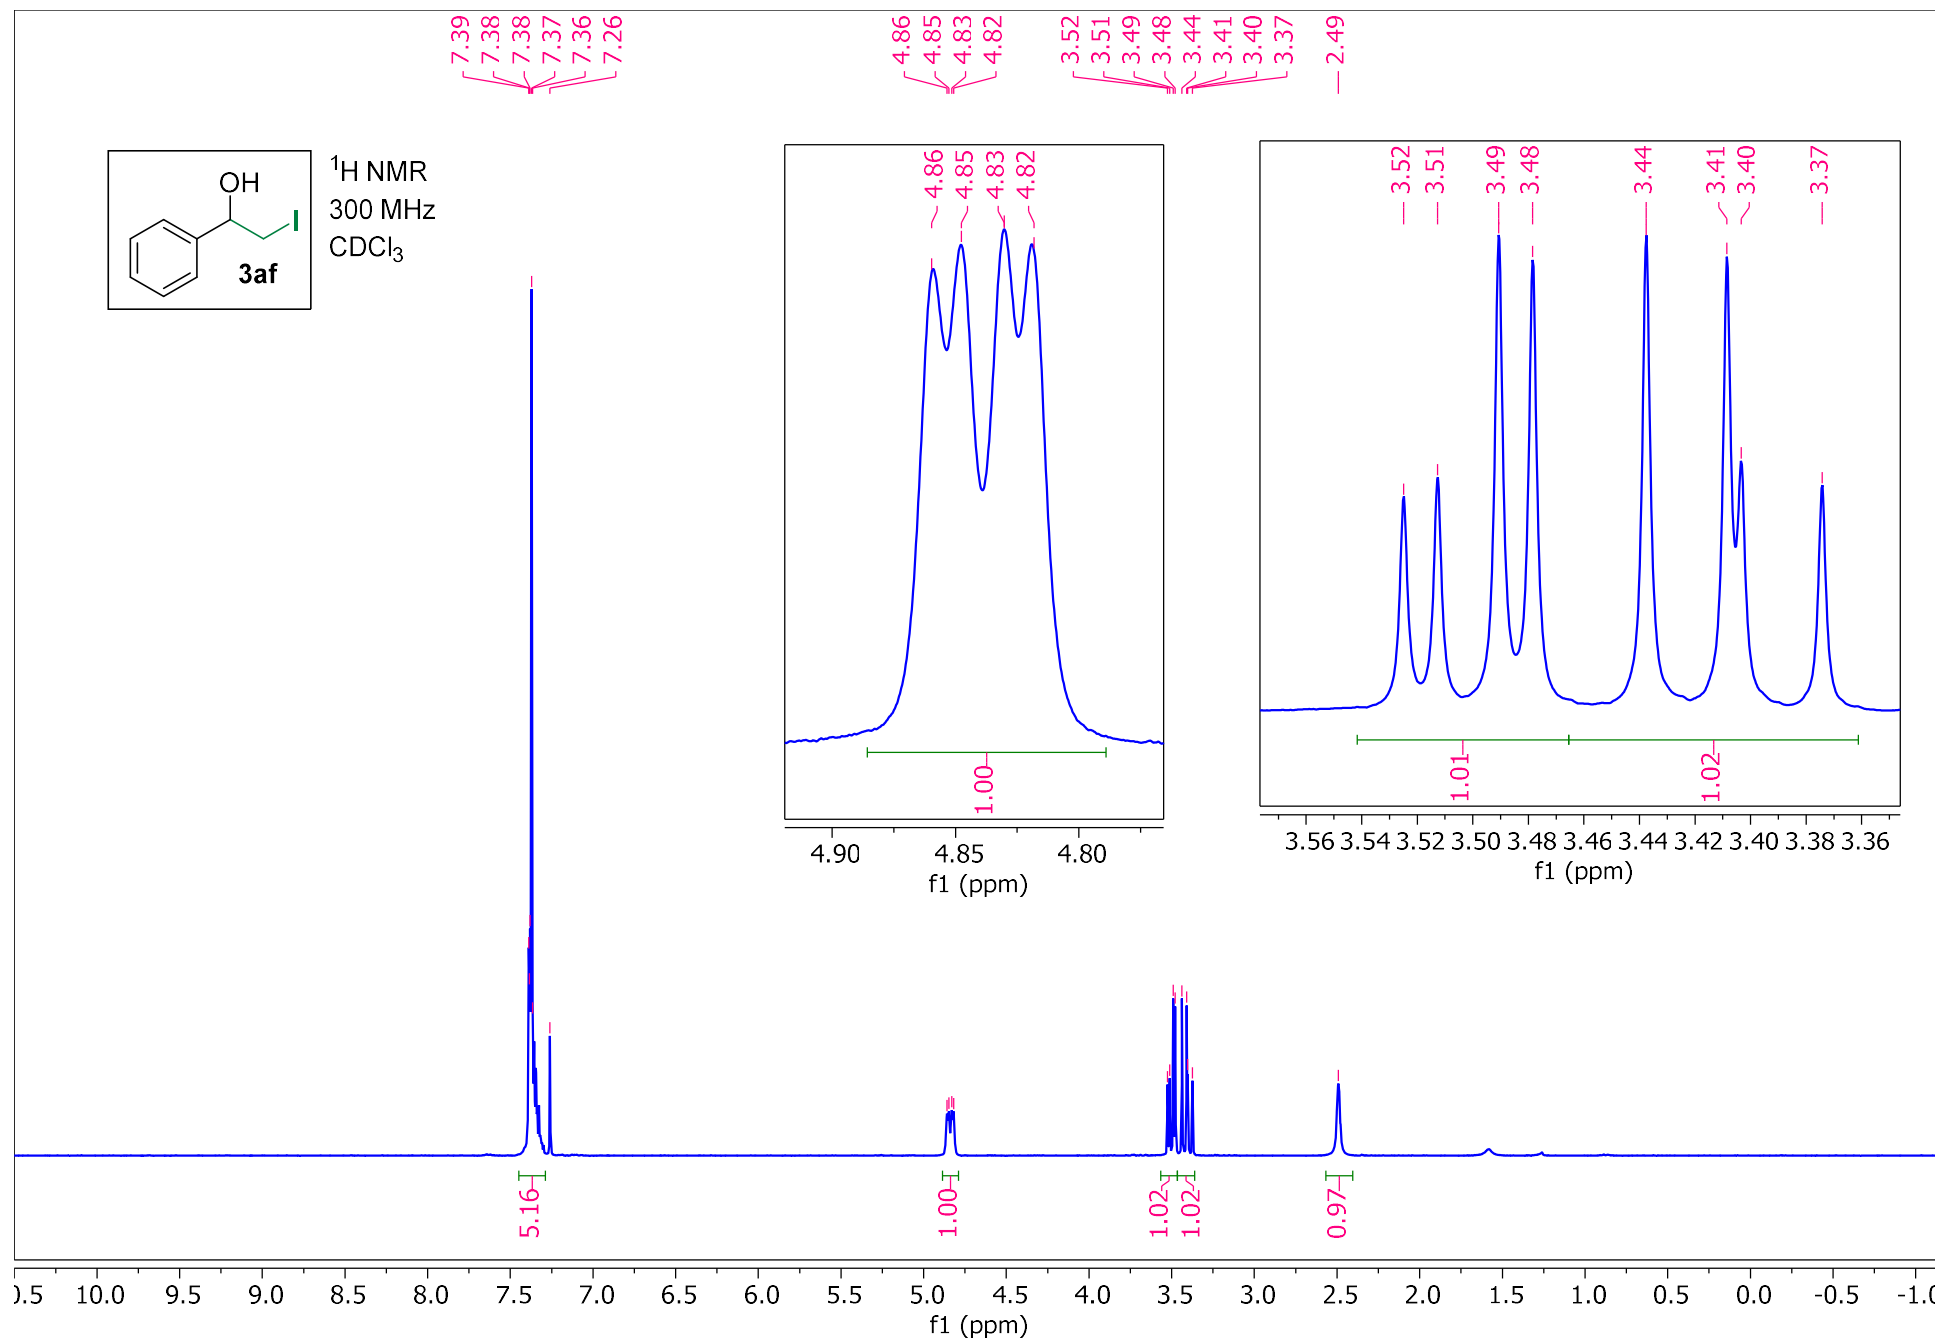

S128



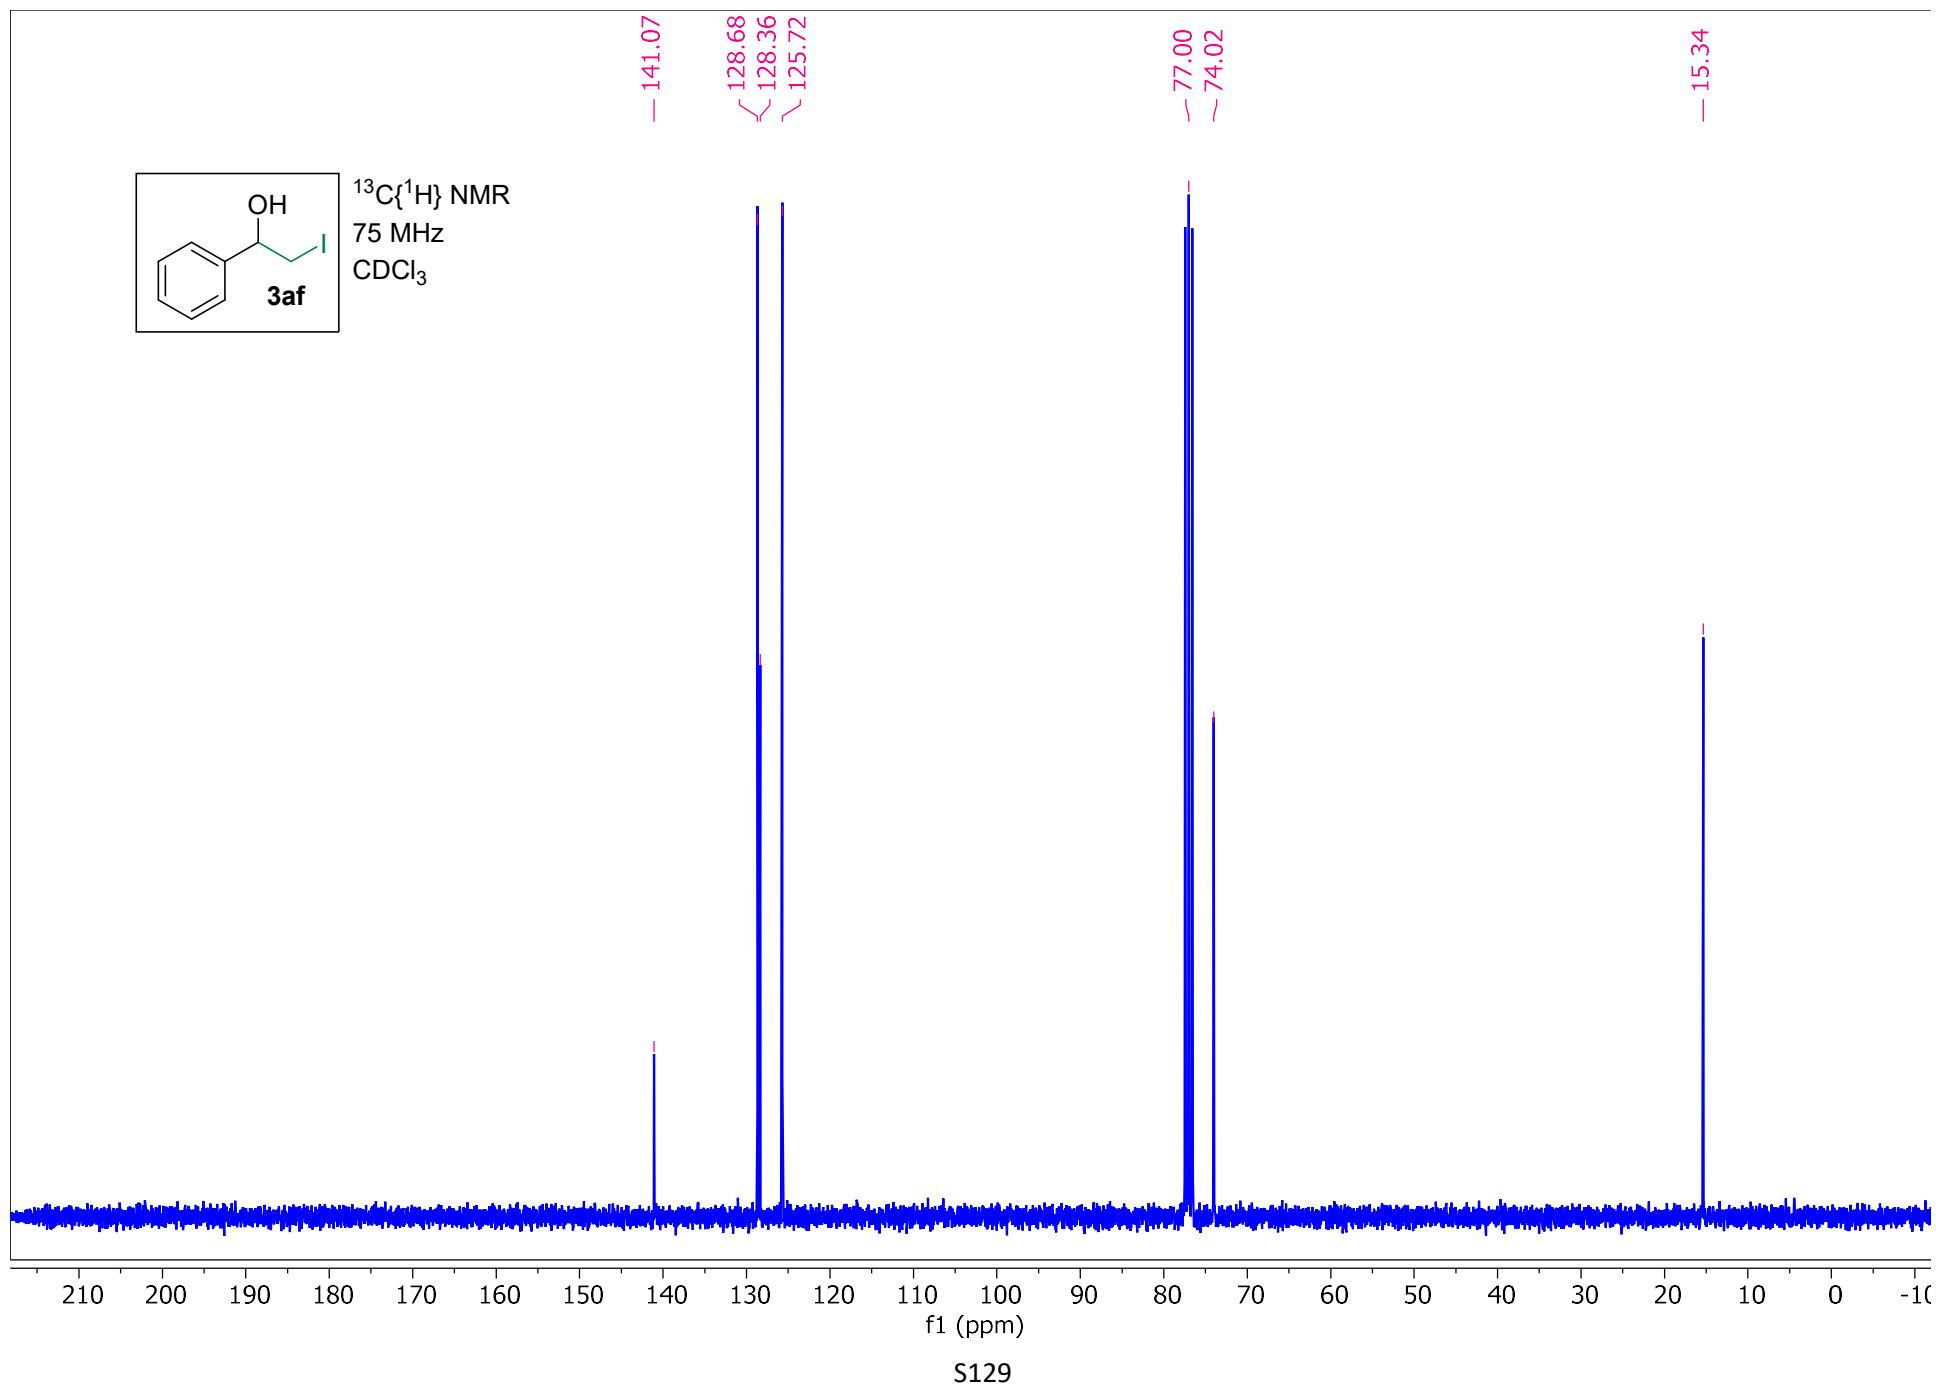

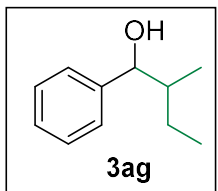

<sup>1</sup>H NMR  
300 MHz  
CDCl<sub>3</sub>

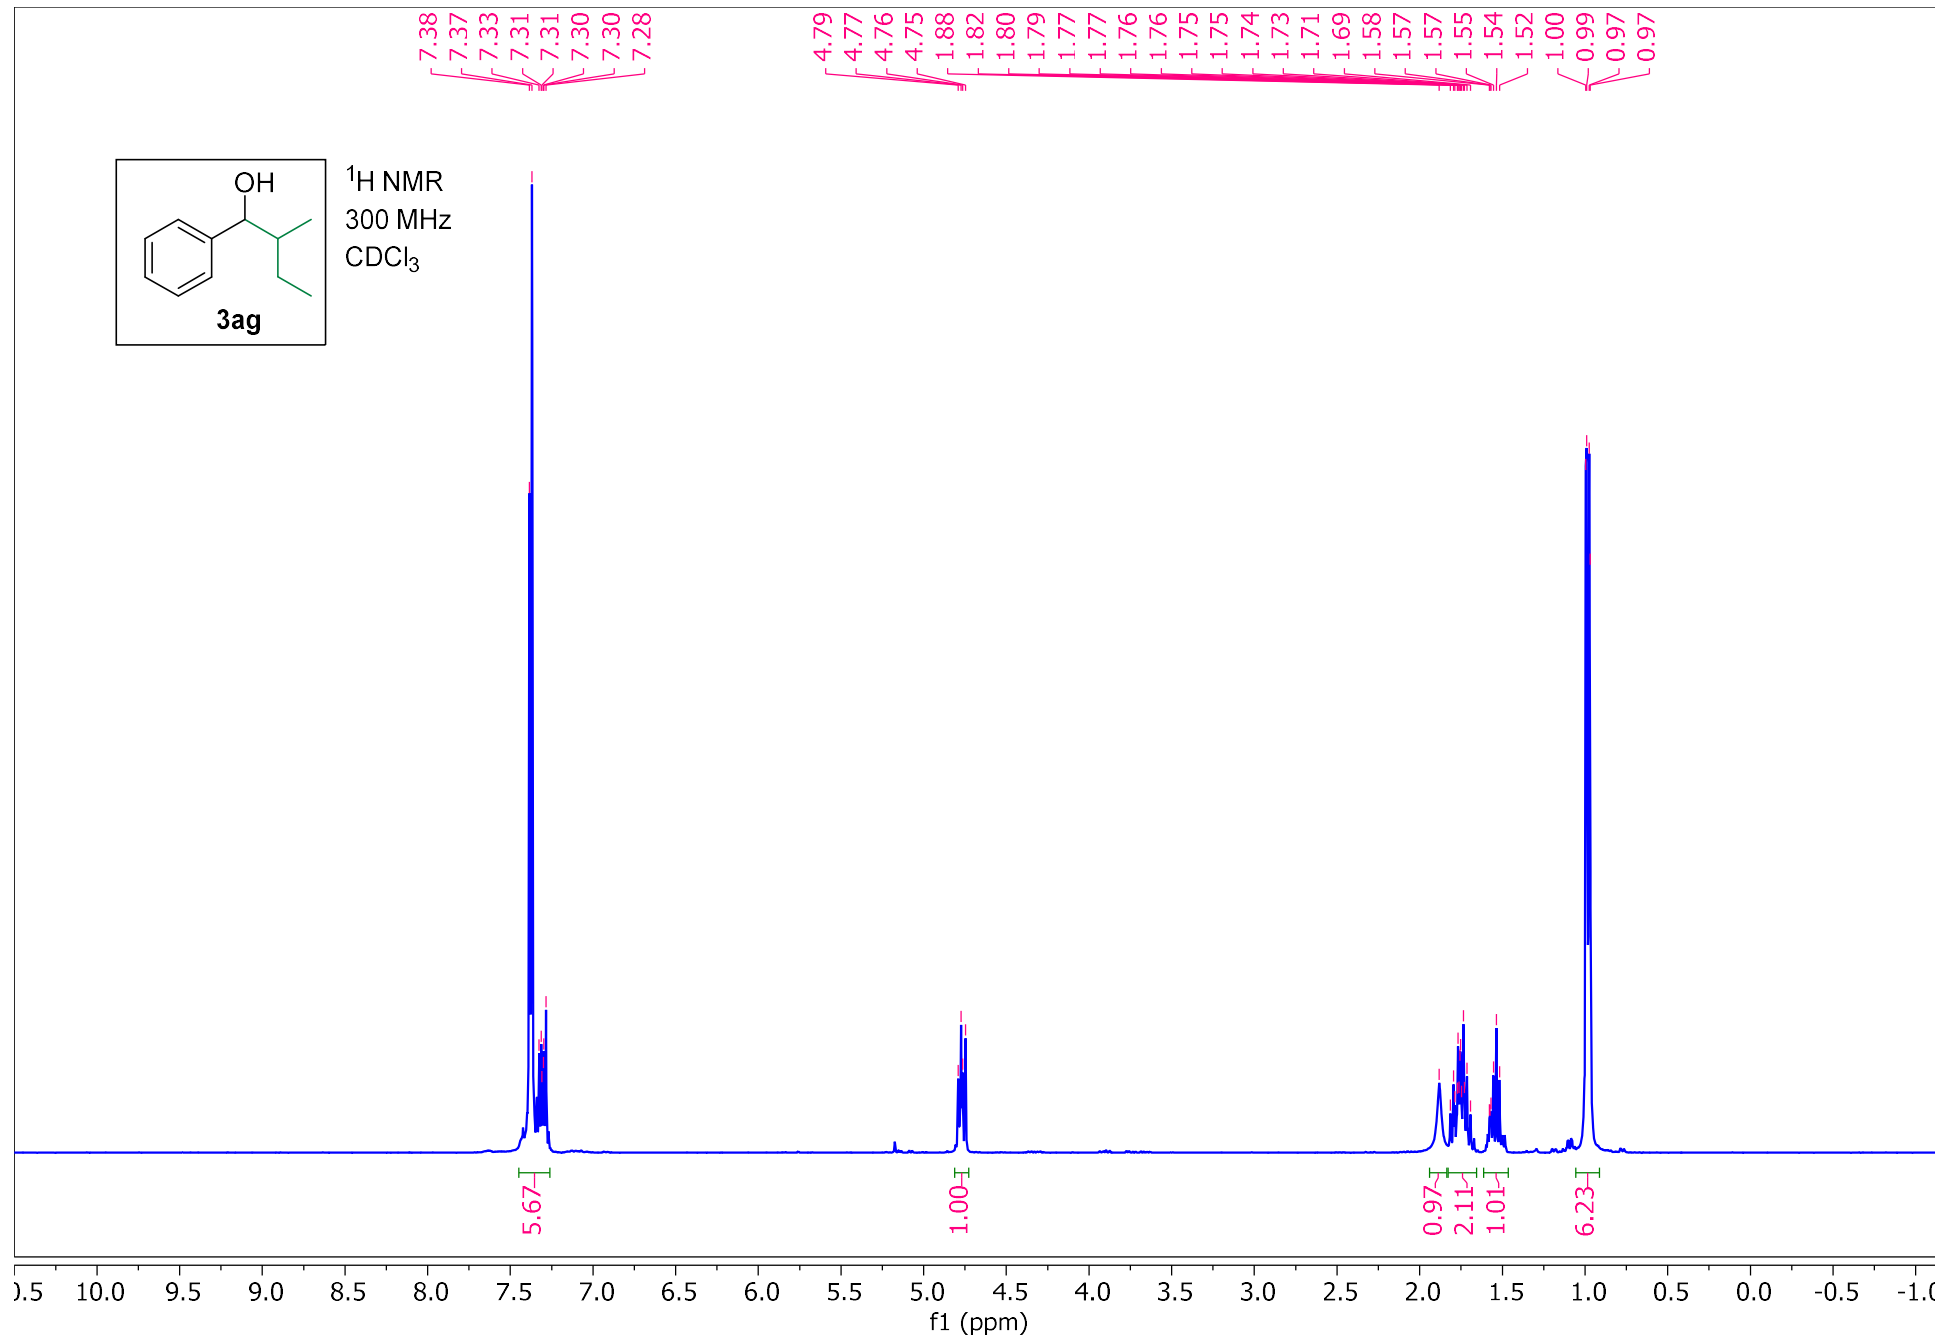

S130

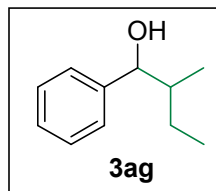

$^{13}\text{C}\{^1\text{H}\}$  NMR  
75 MHz  
 $\text{CDCl}_3$

— 145.20

— 128.44

— 127.47

— 125.84

— 77.00

— 72.76

— 48.34

— 24.78

— 23.11

— 22.23

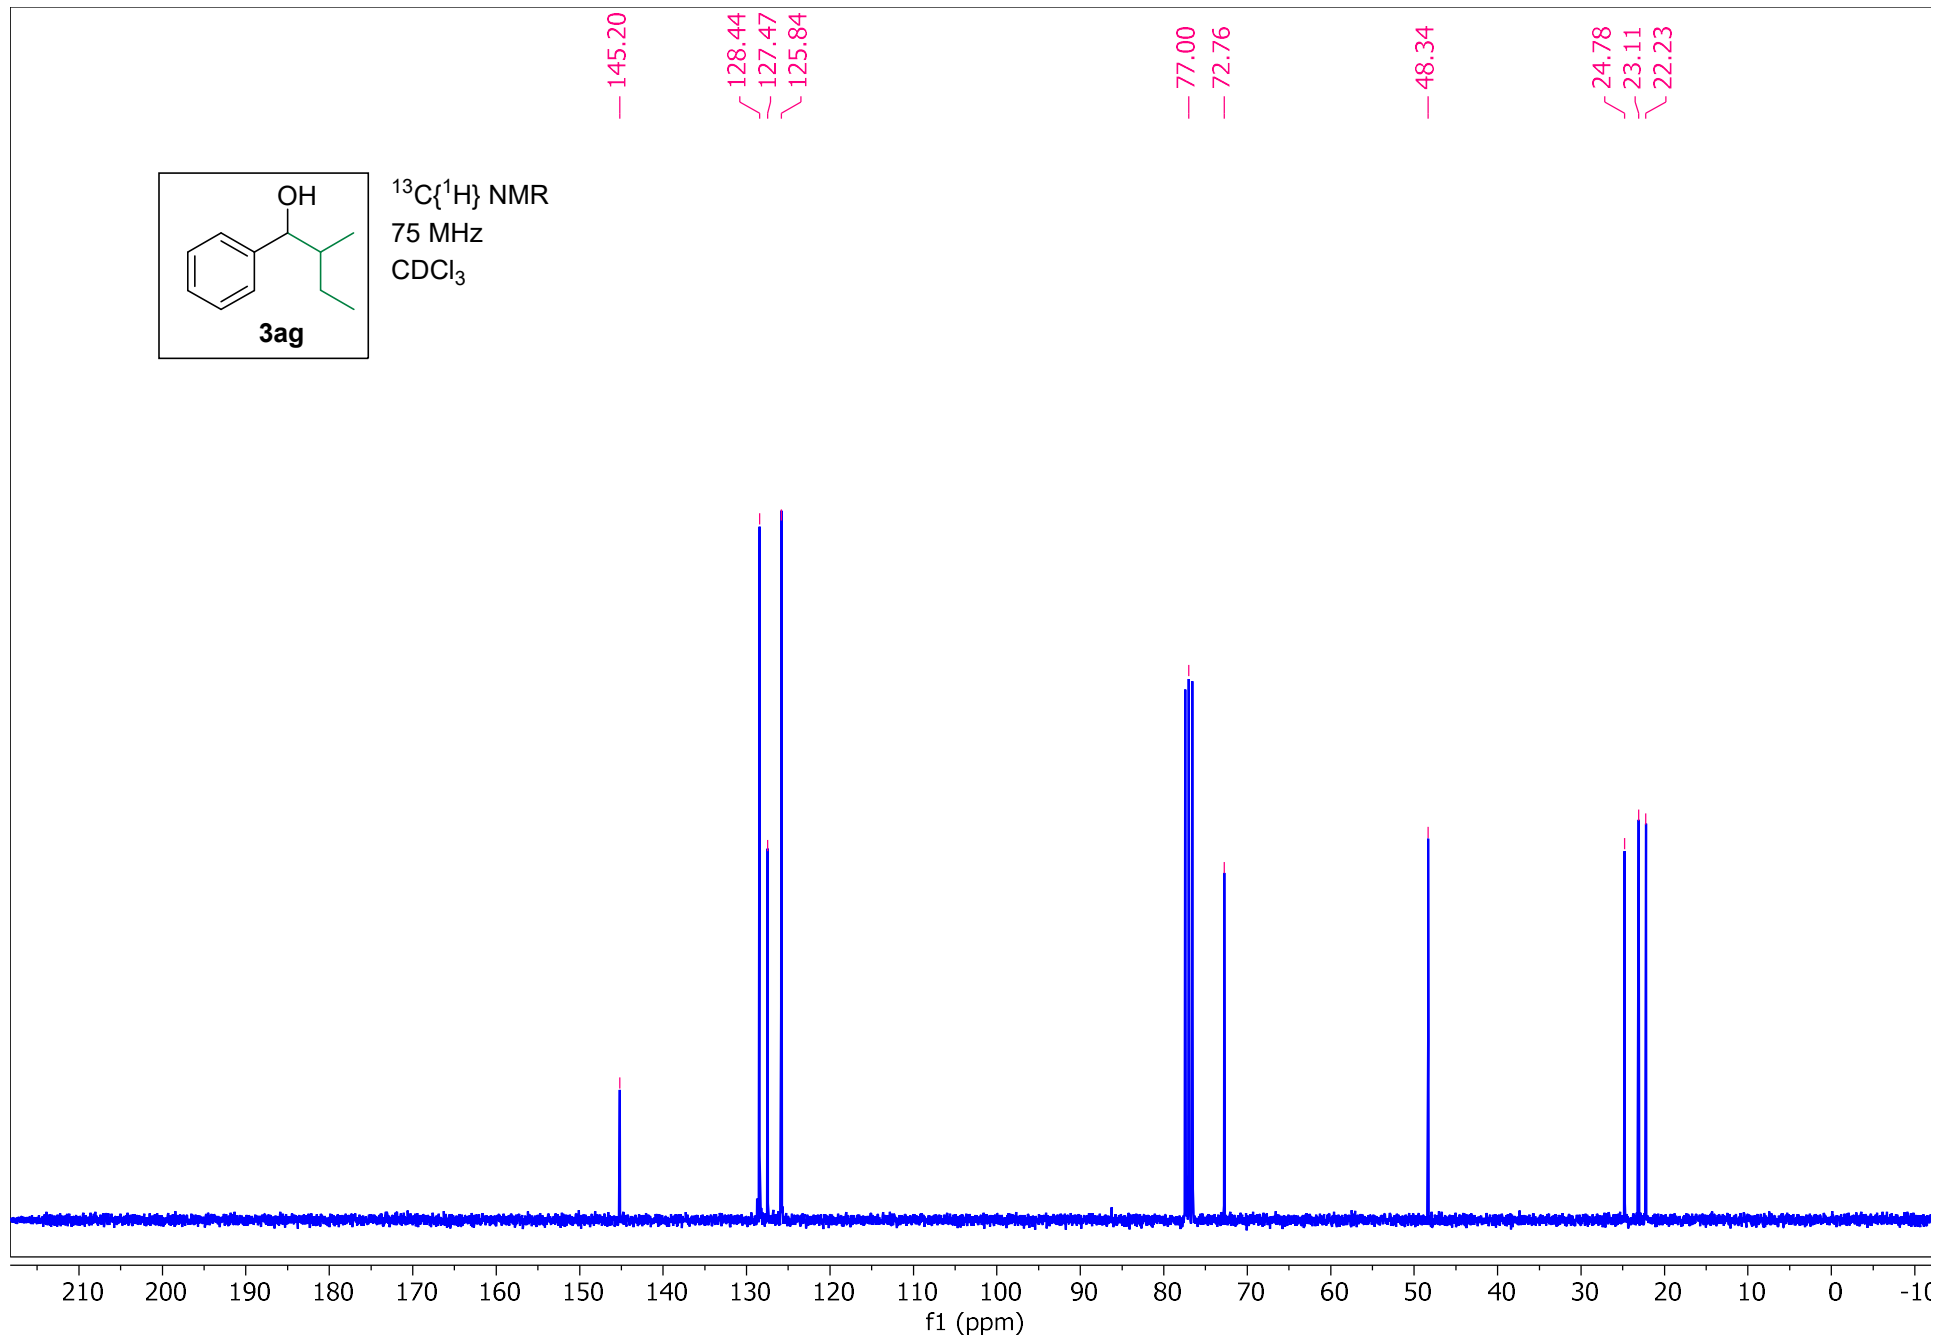

S131

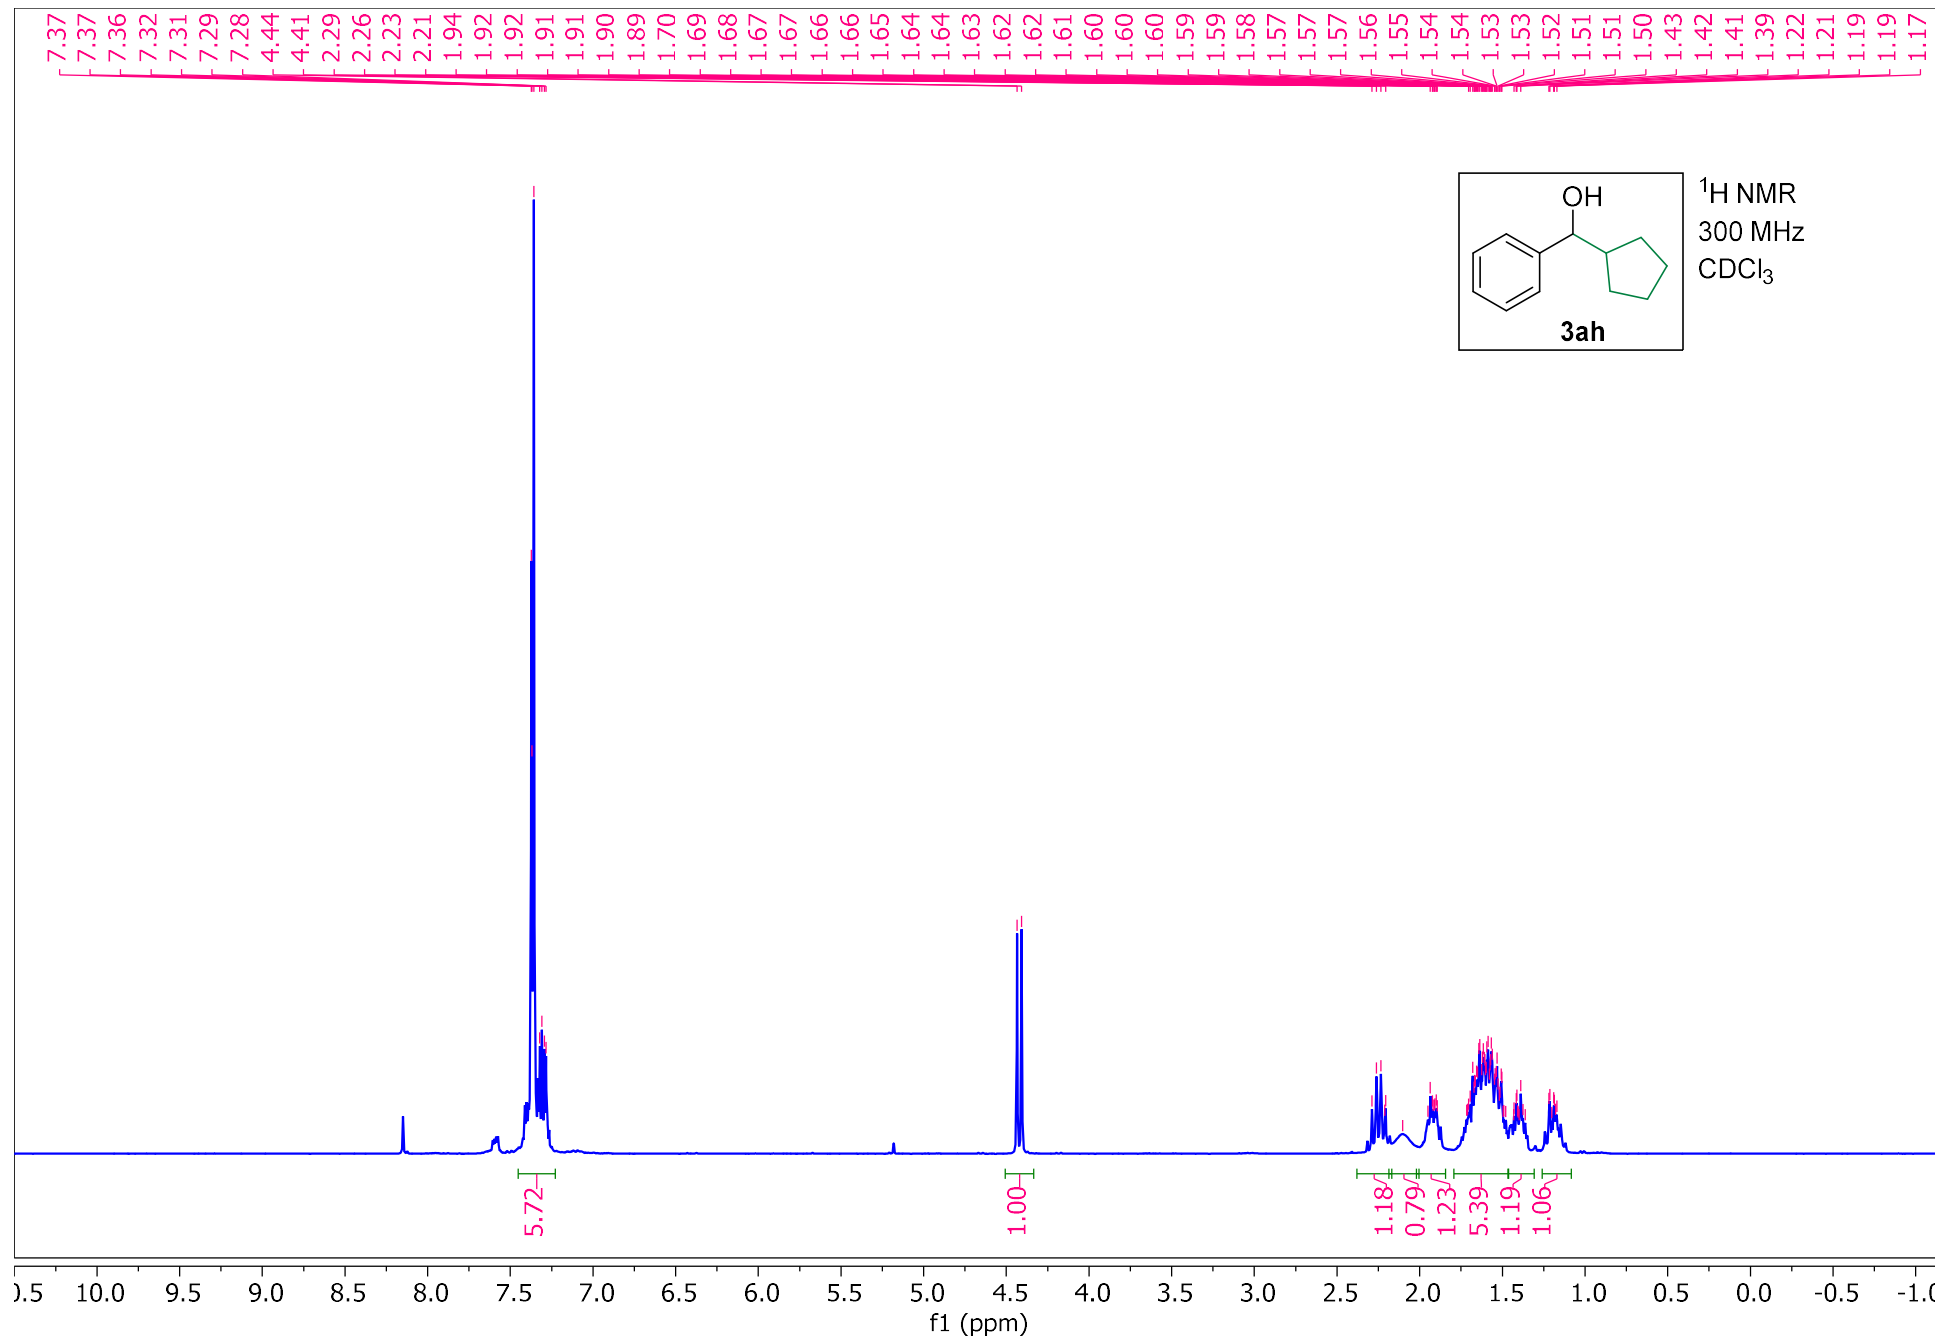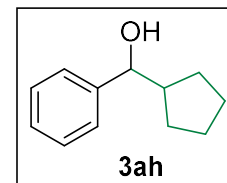

<sup>1</sup>H NMR  
300 MHz  
CDCl<sub>3</sub>

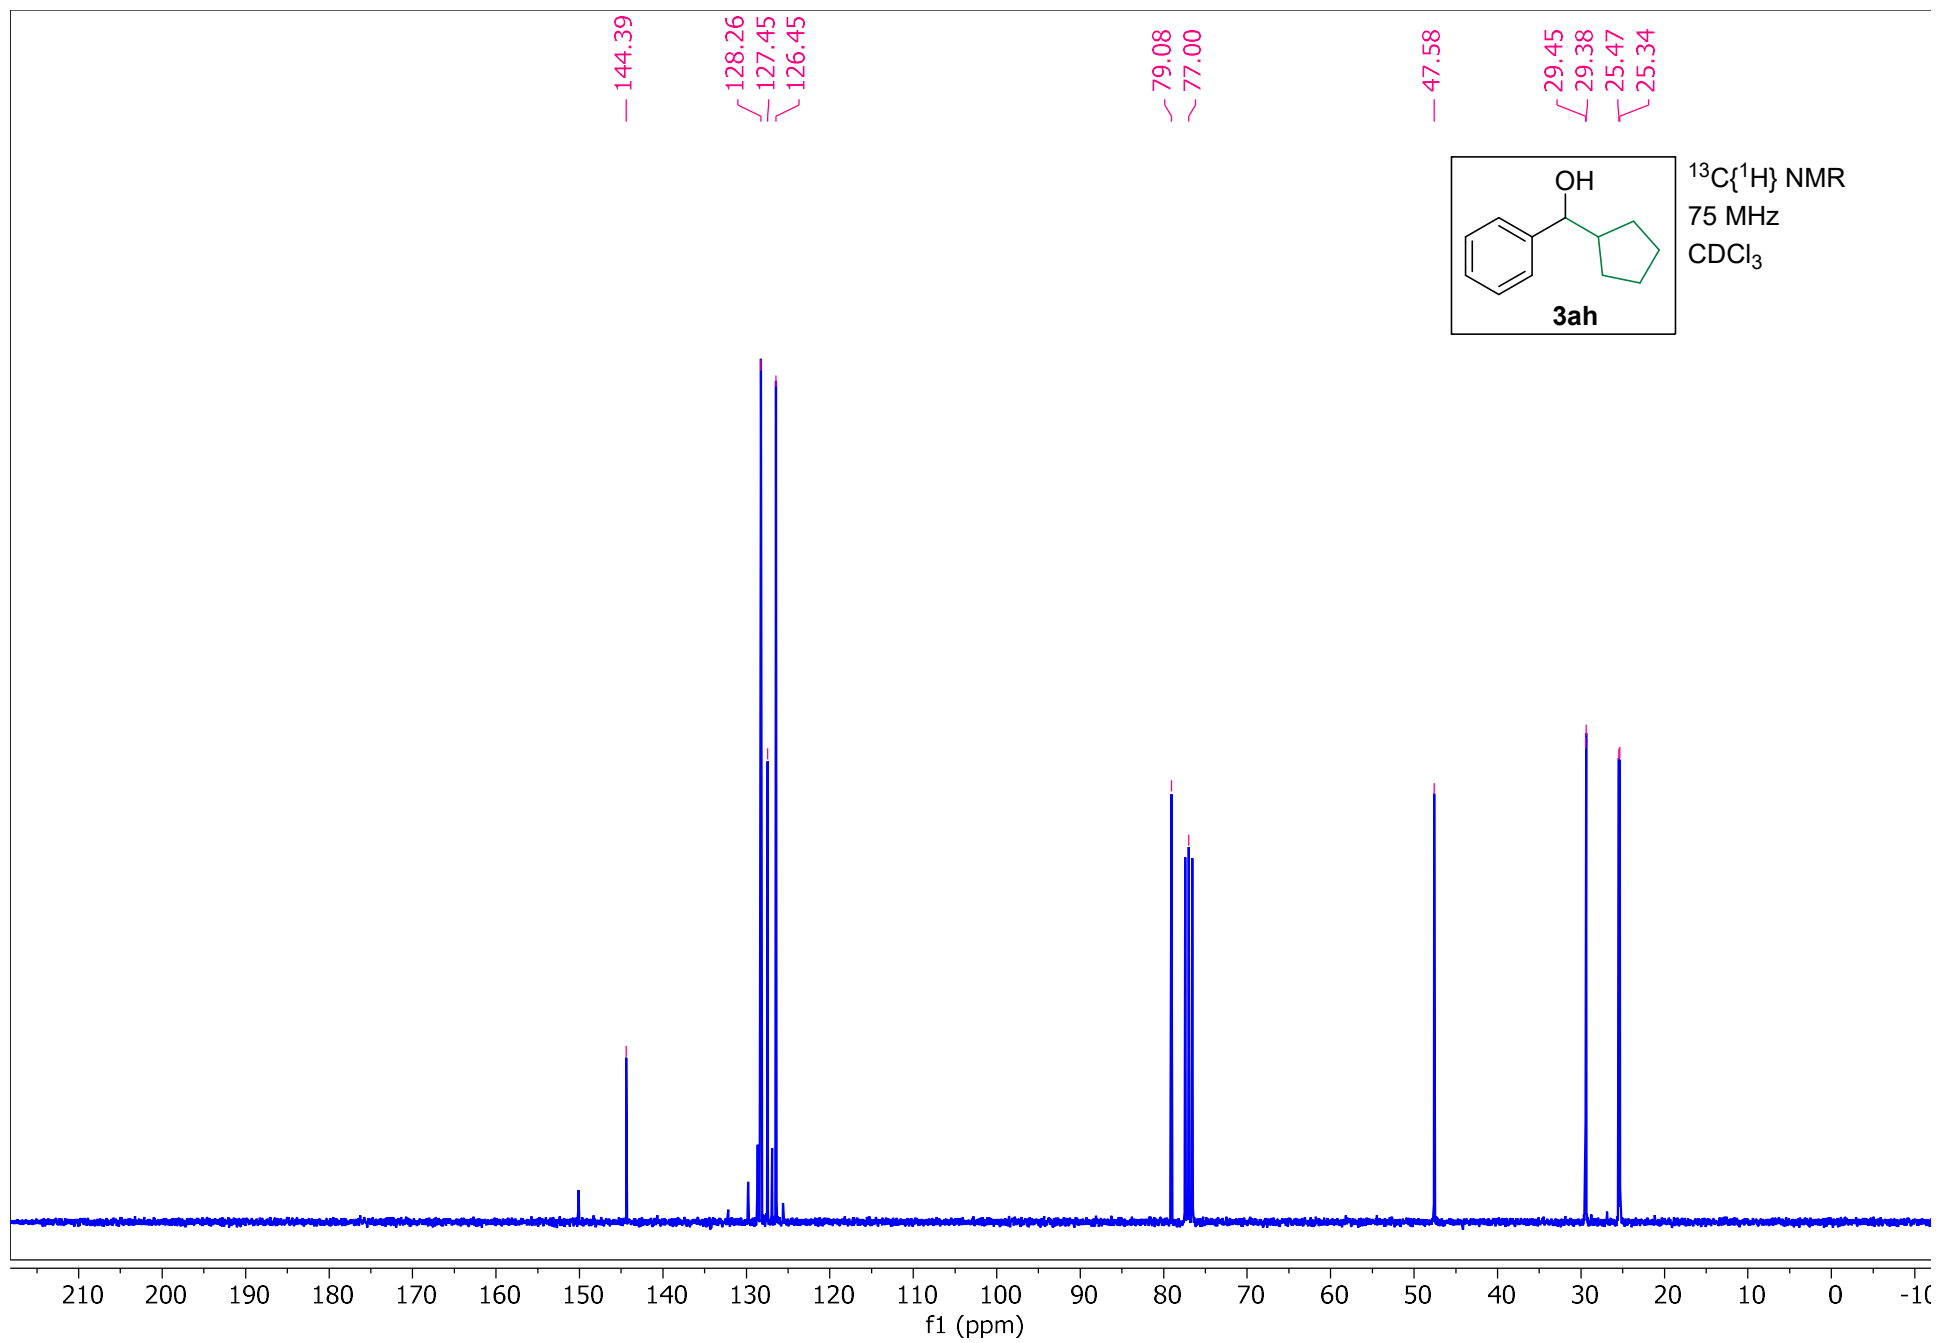

S133

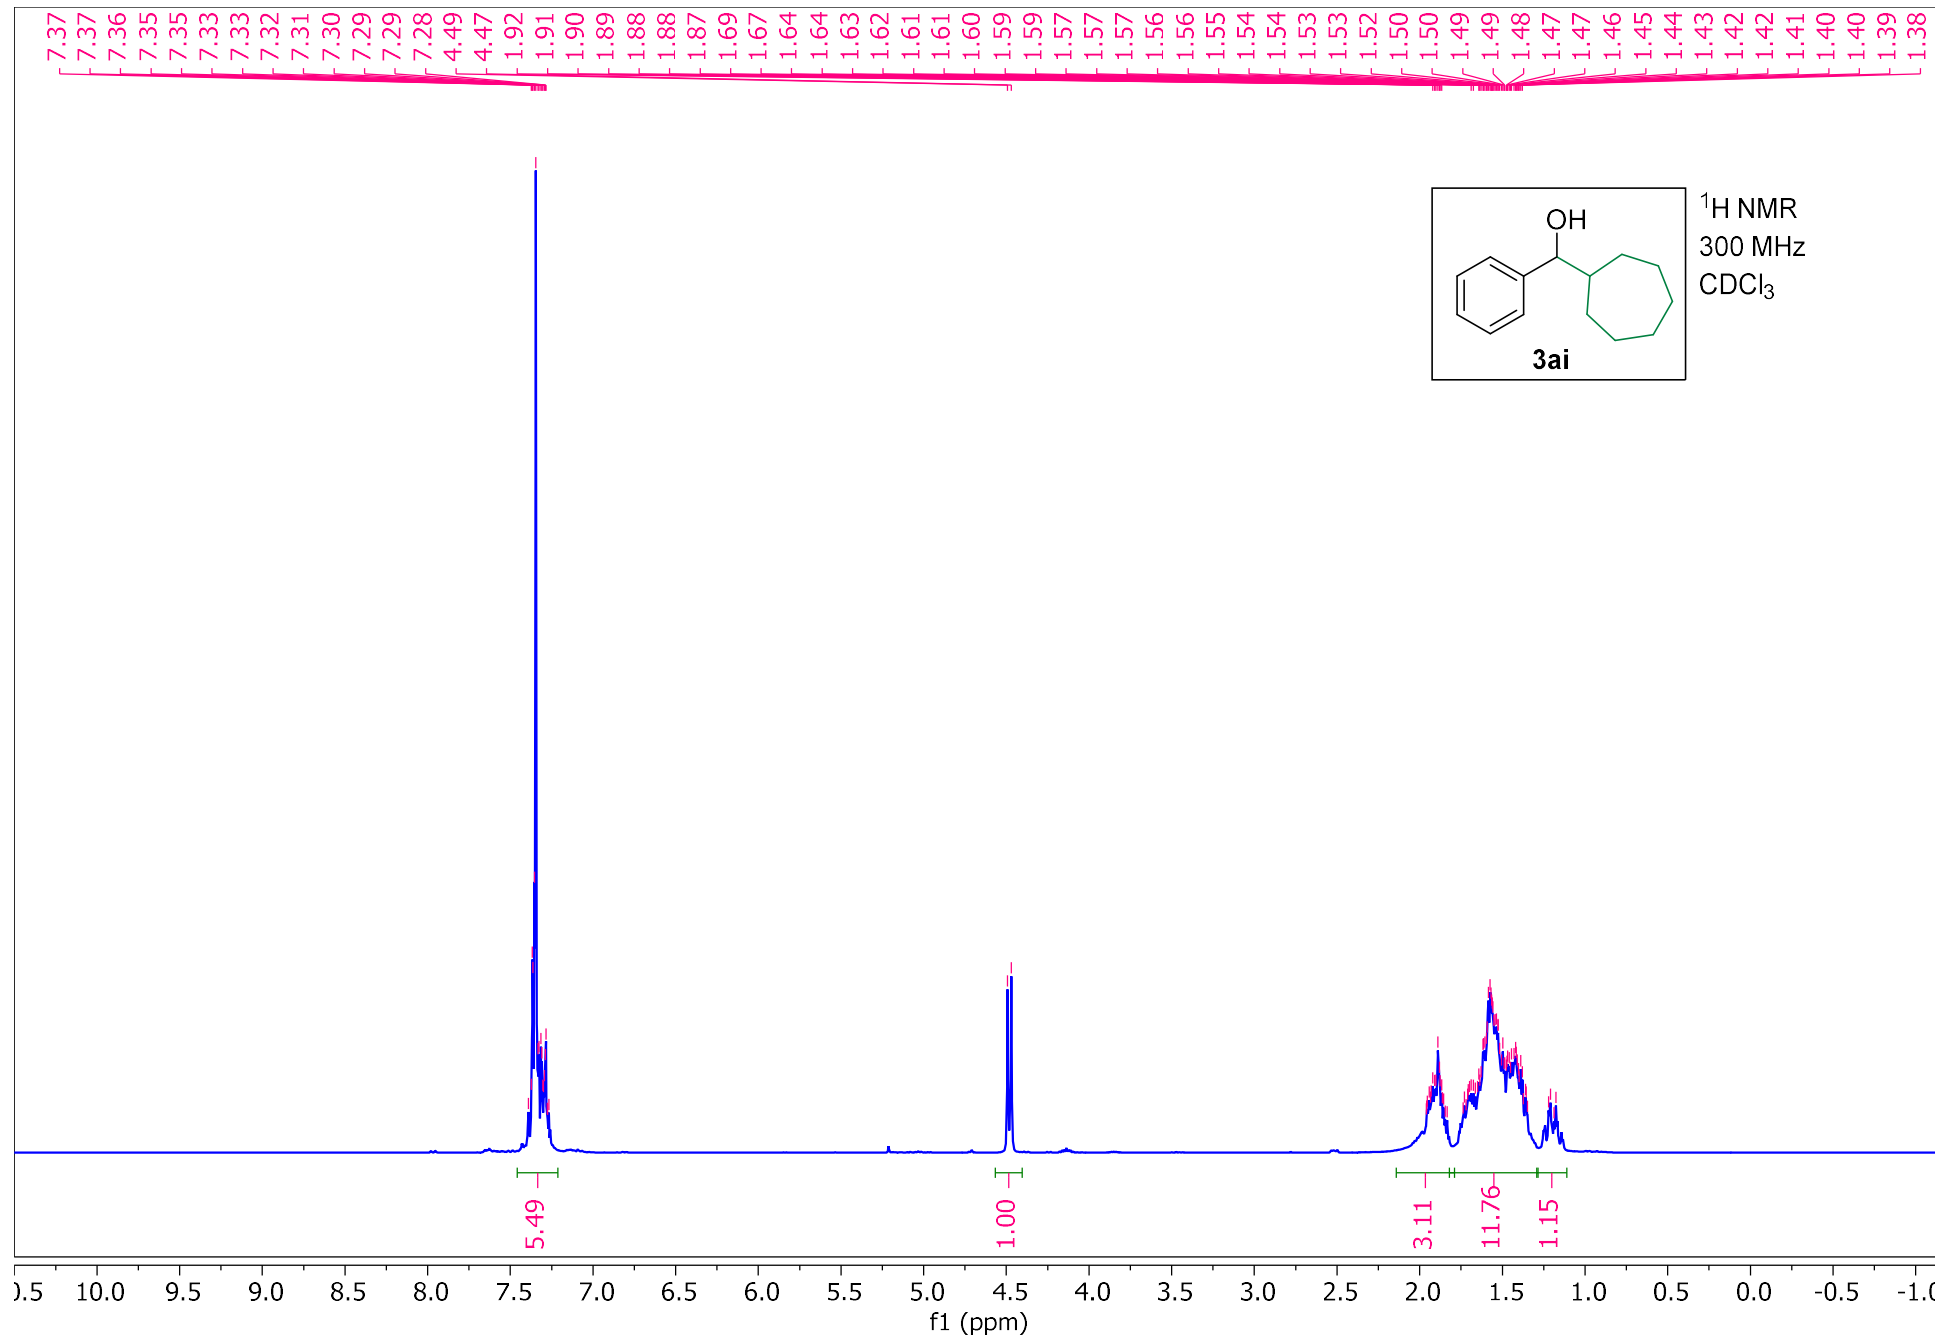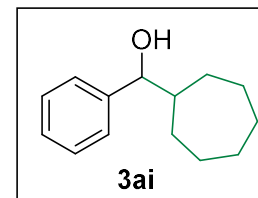

<sup>1</sup>H NMR  
300 MHz  
CDCl<sub>3</sub>

S134

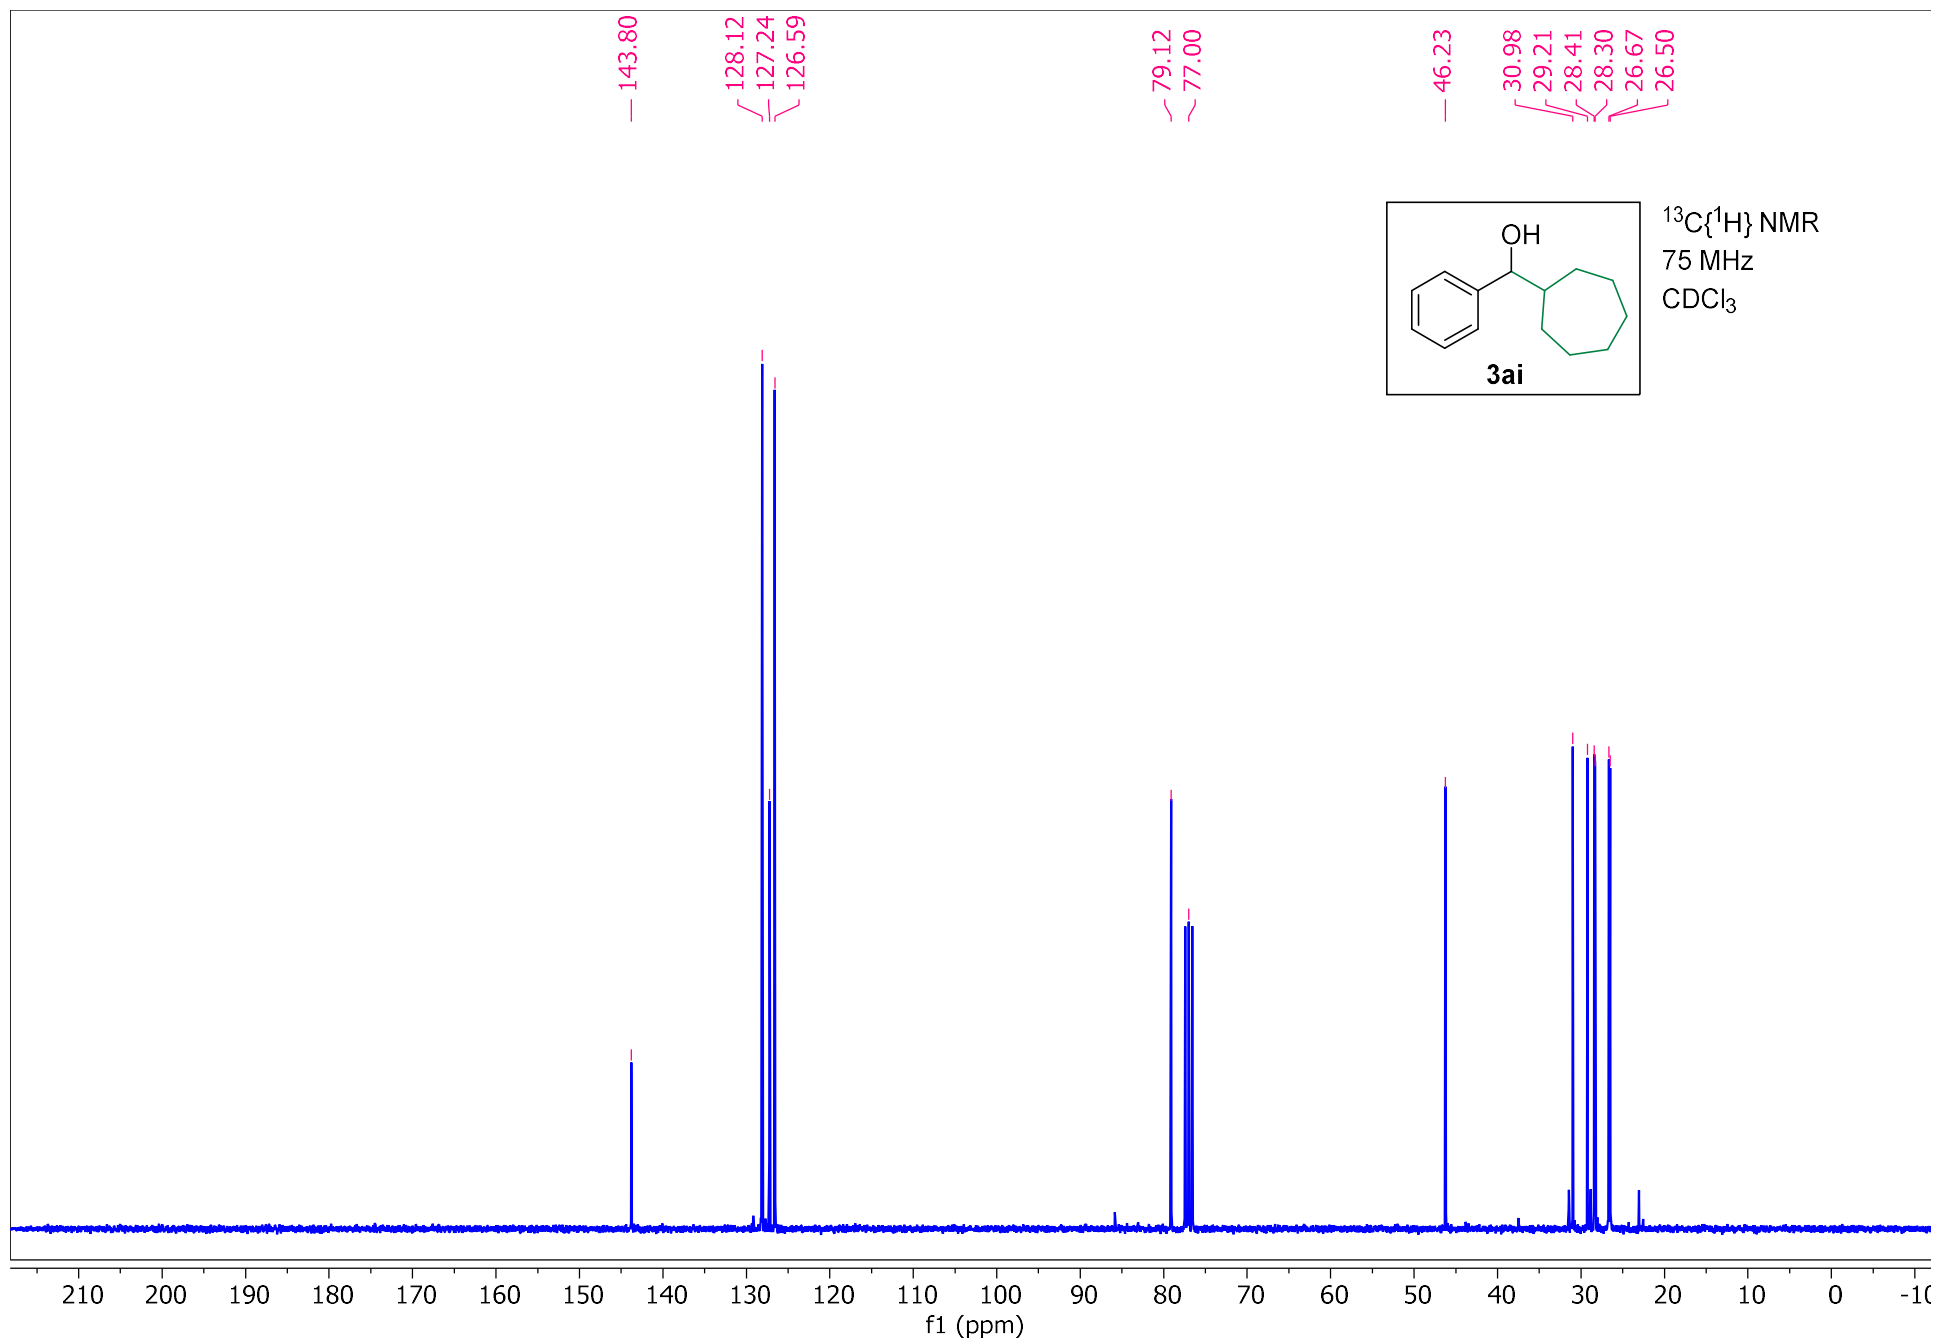

S135

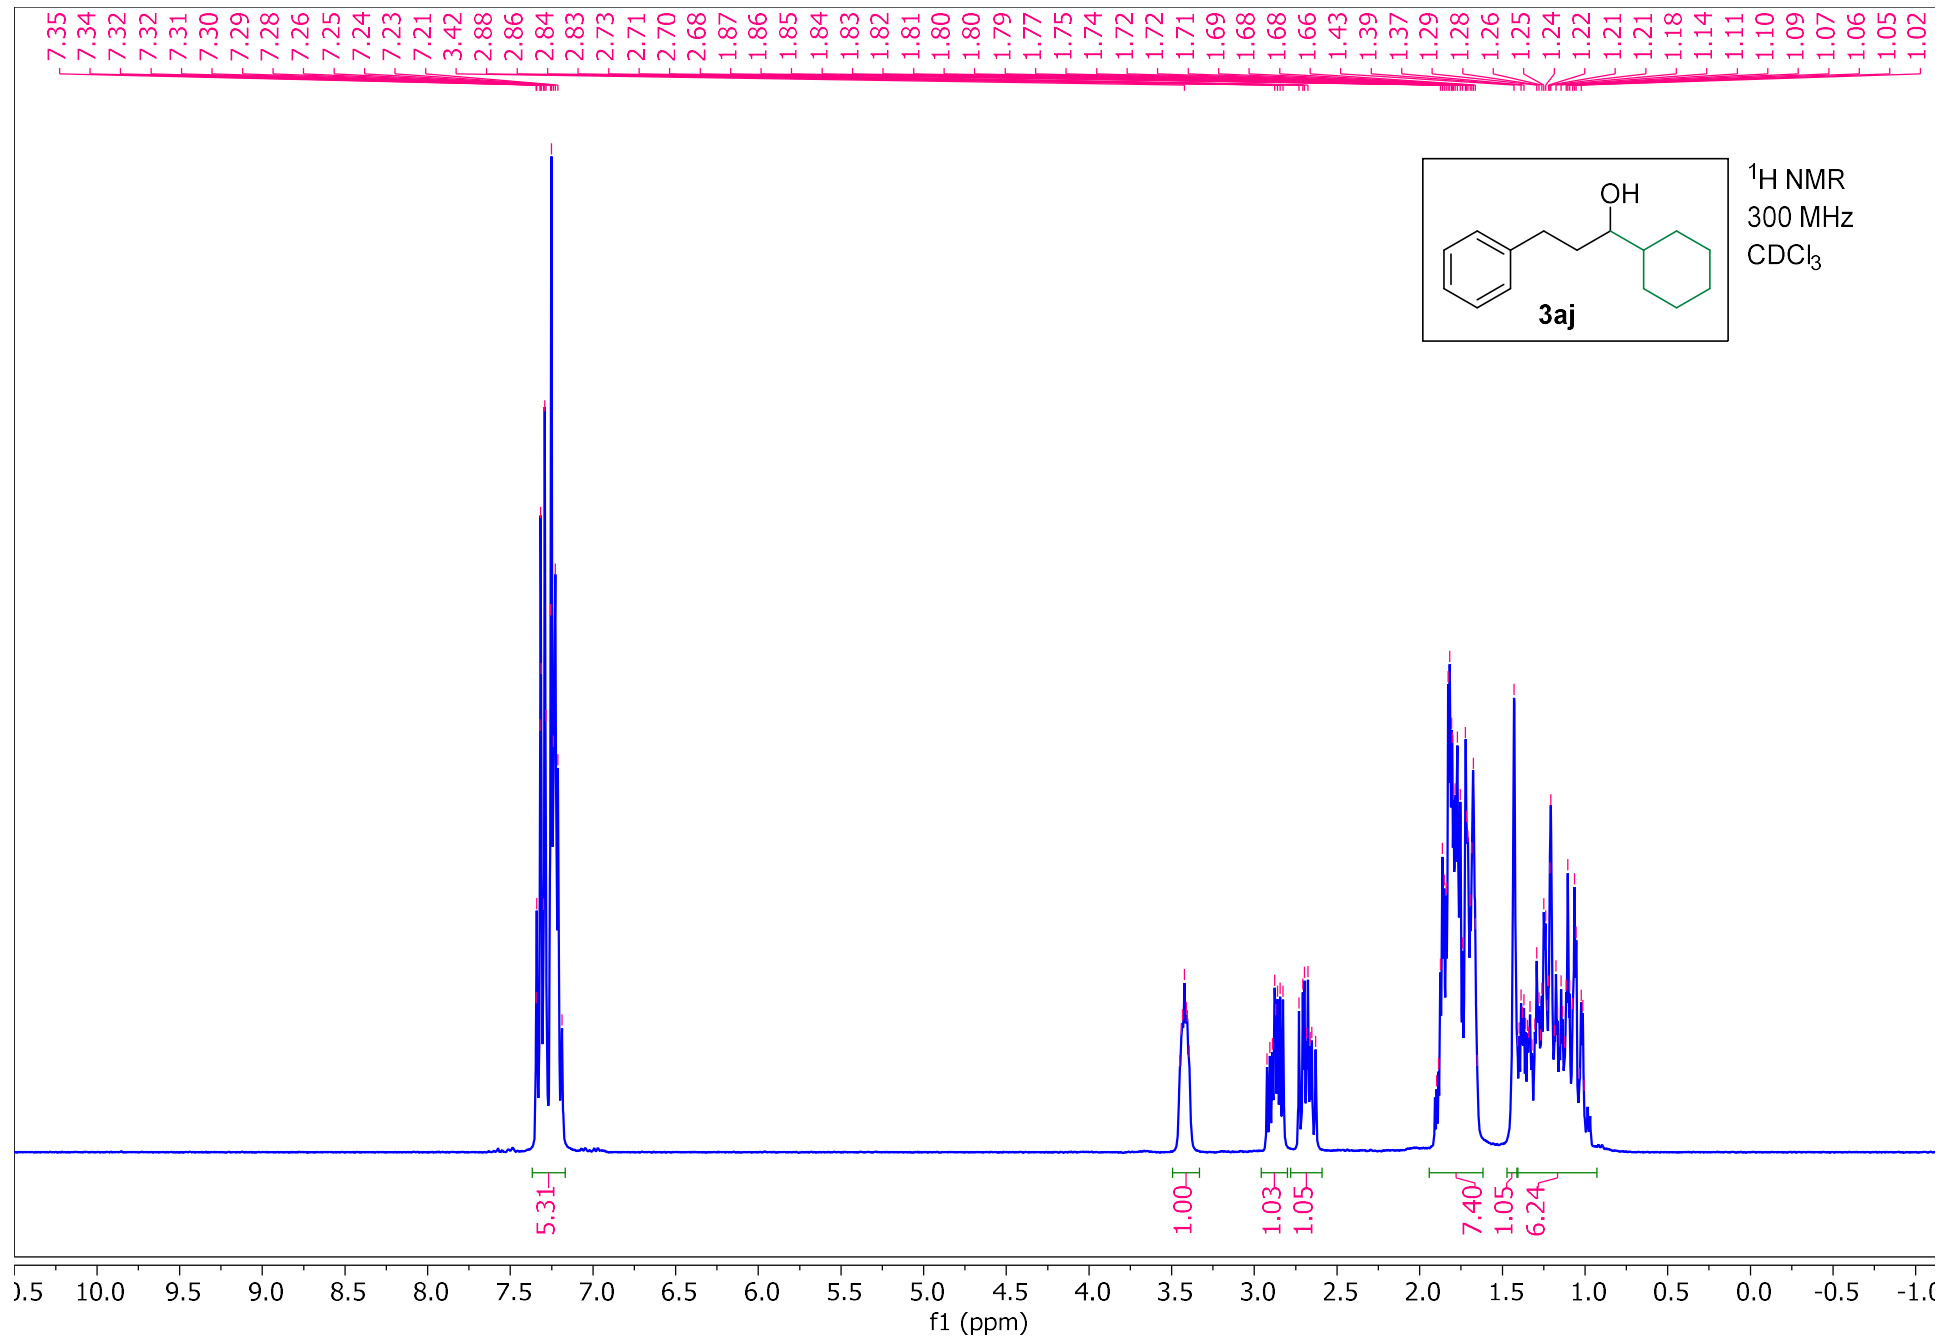

S136



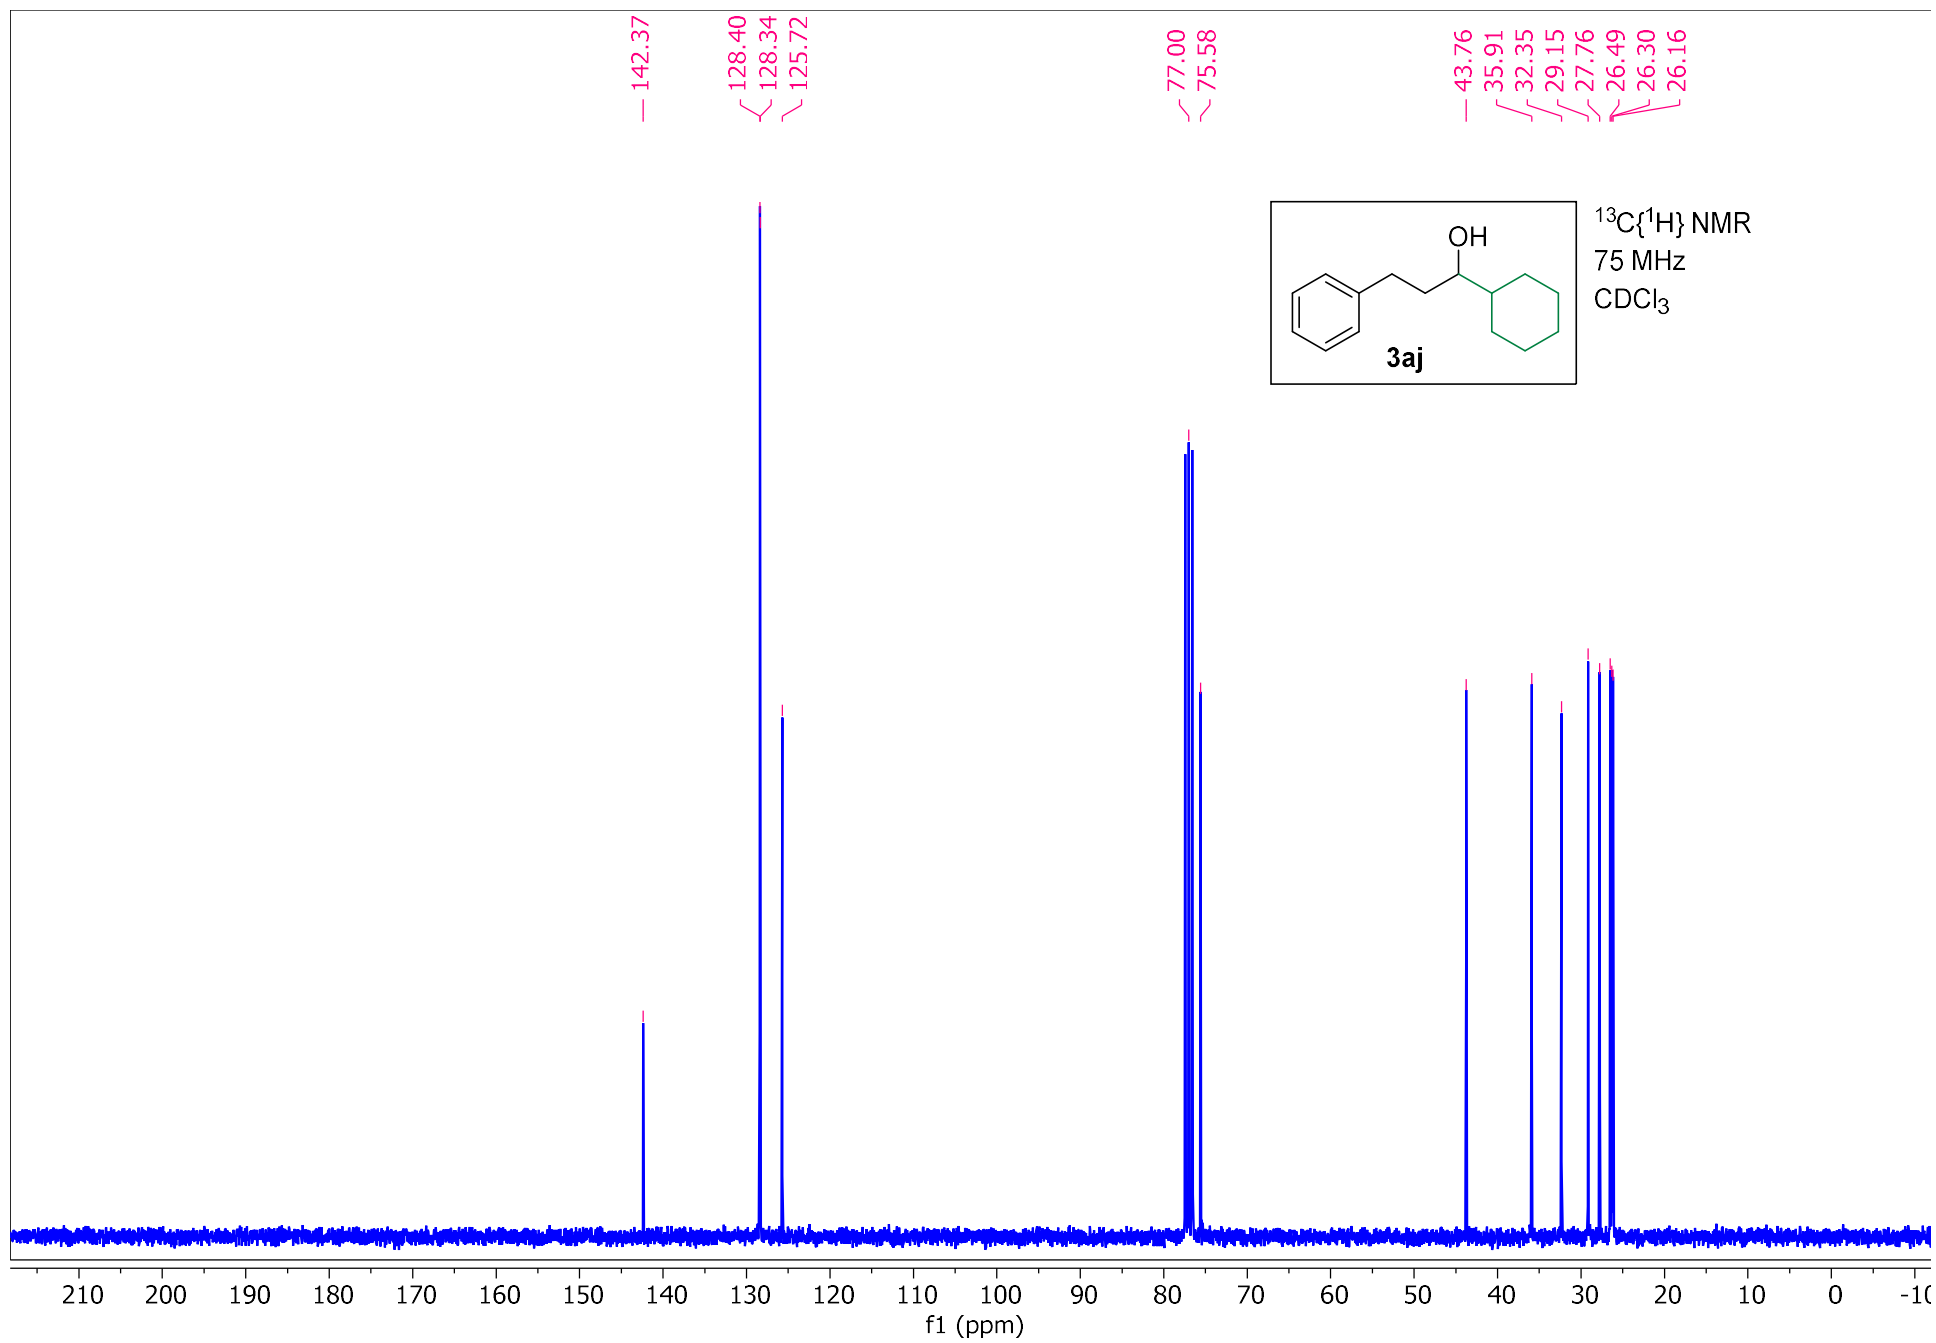

S137

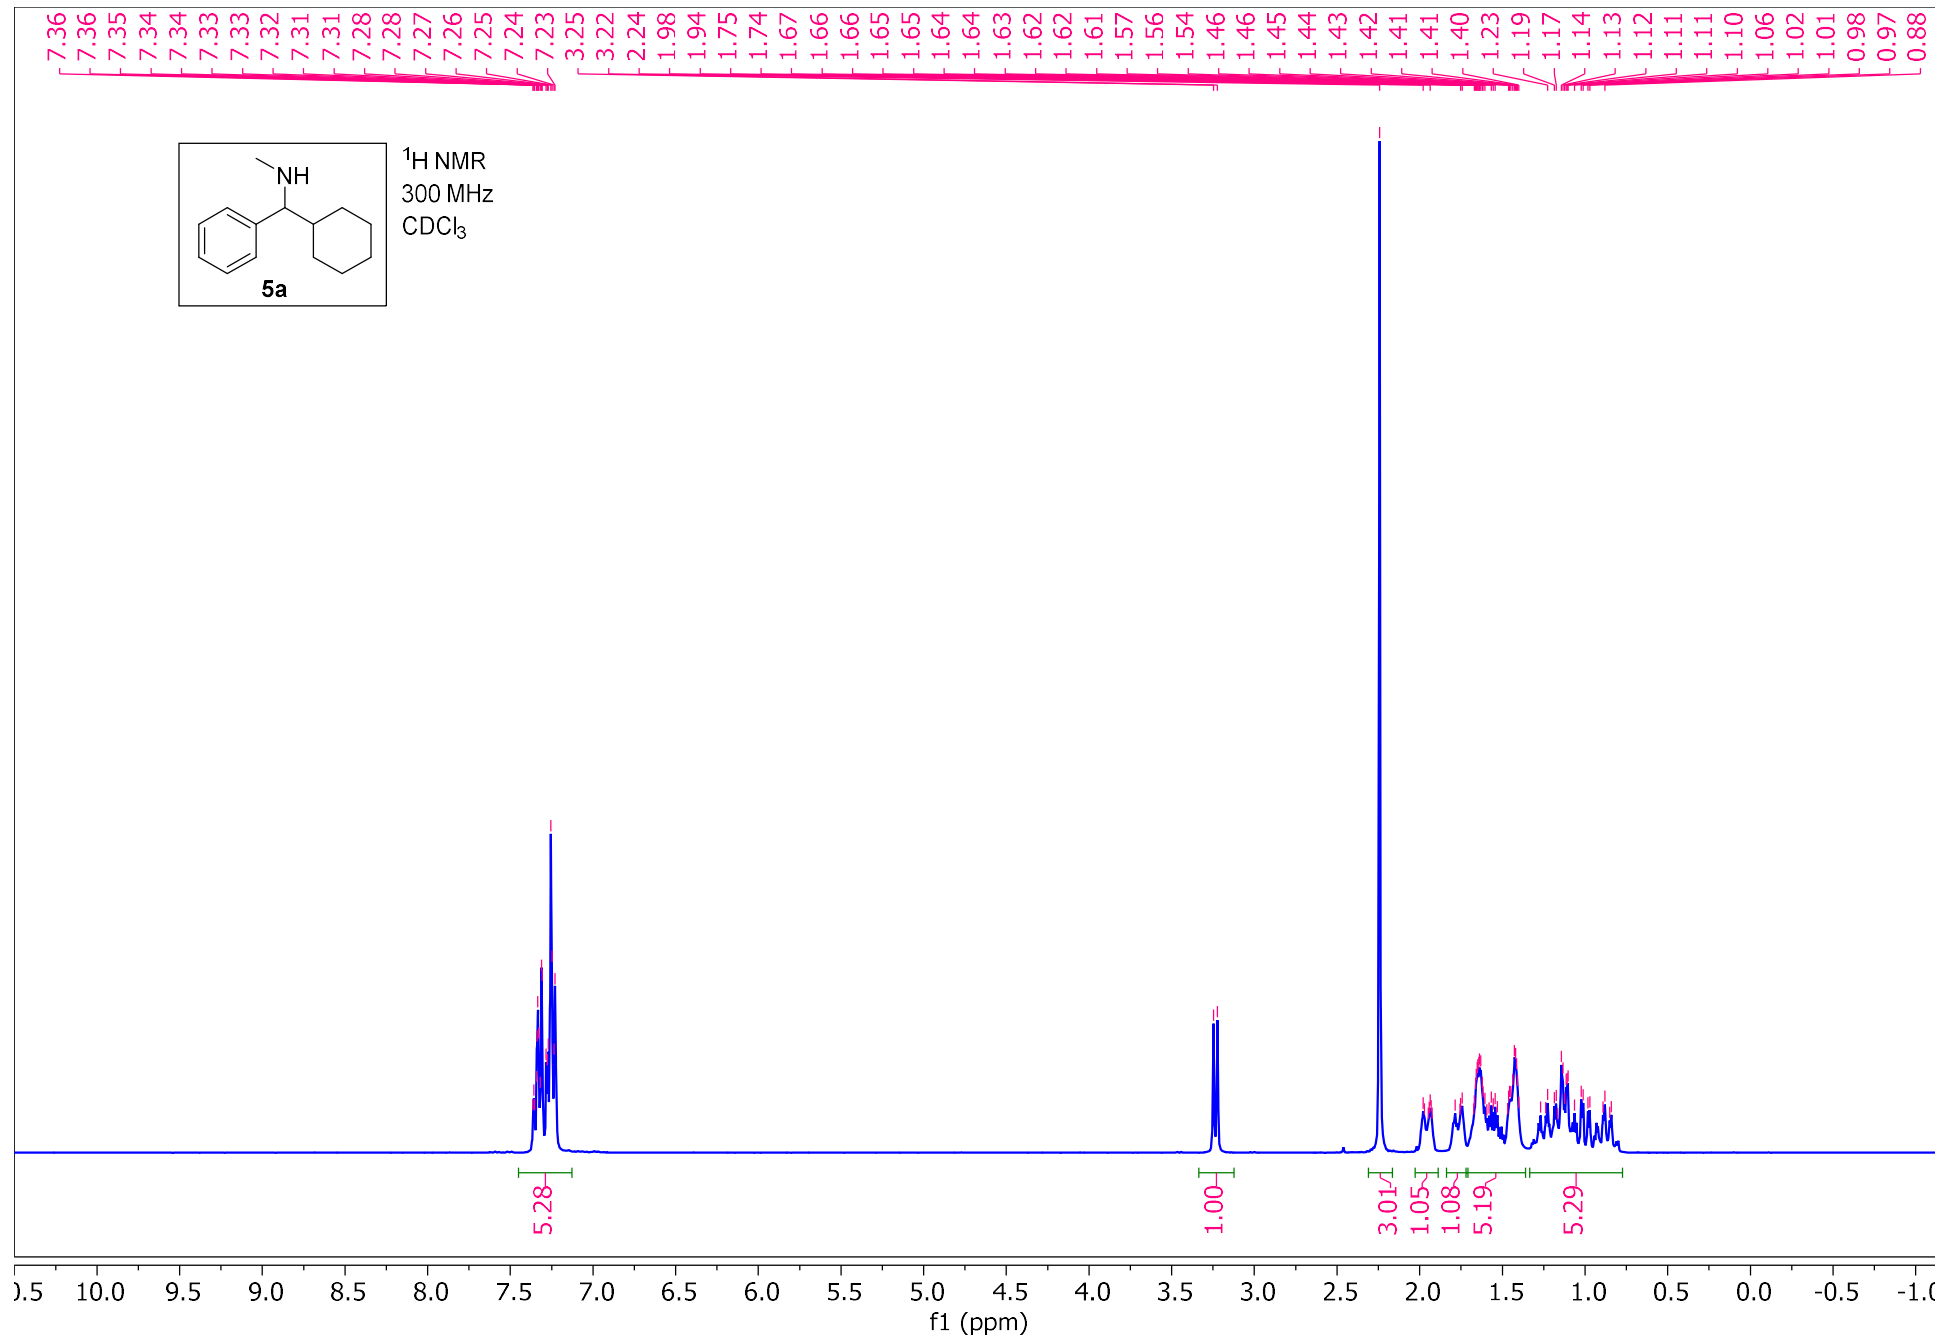

S138

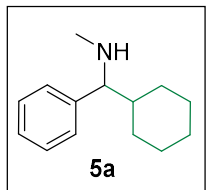

$^{13}\text{C}\{^1\text{H}\}$  NMR  
75 MHz  
 $\text{CDCl}_3$

— 142.52  
{ 128.02  
  127.97  
  126.73  
— 77.00  
— 71.08  
— 44.01  
{ 34.74  
  30.25  
  29.83  
  26.50  
{ 26.31  
  26.26

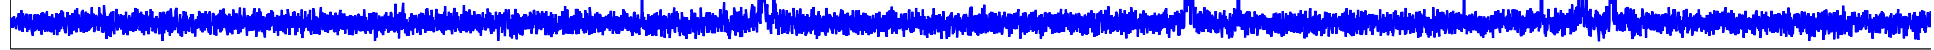

210 200 190 180 170 160 150 140 130 120 110 100 90 80 70 60 50 40 30 20 10 0 -10

f1 (ppm)

S139

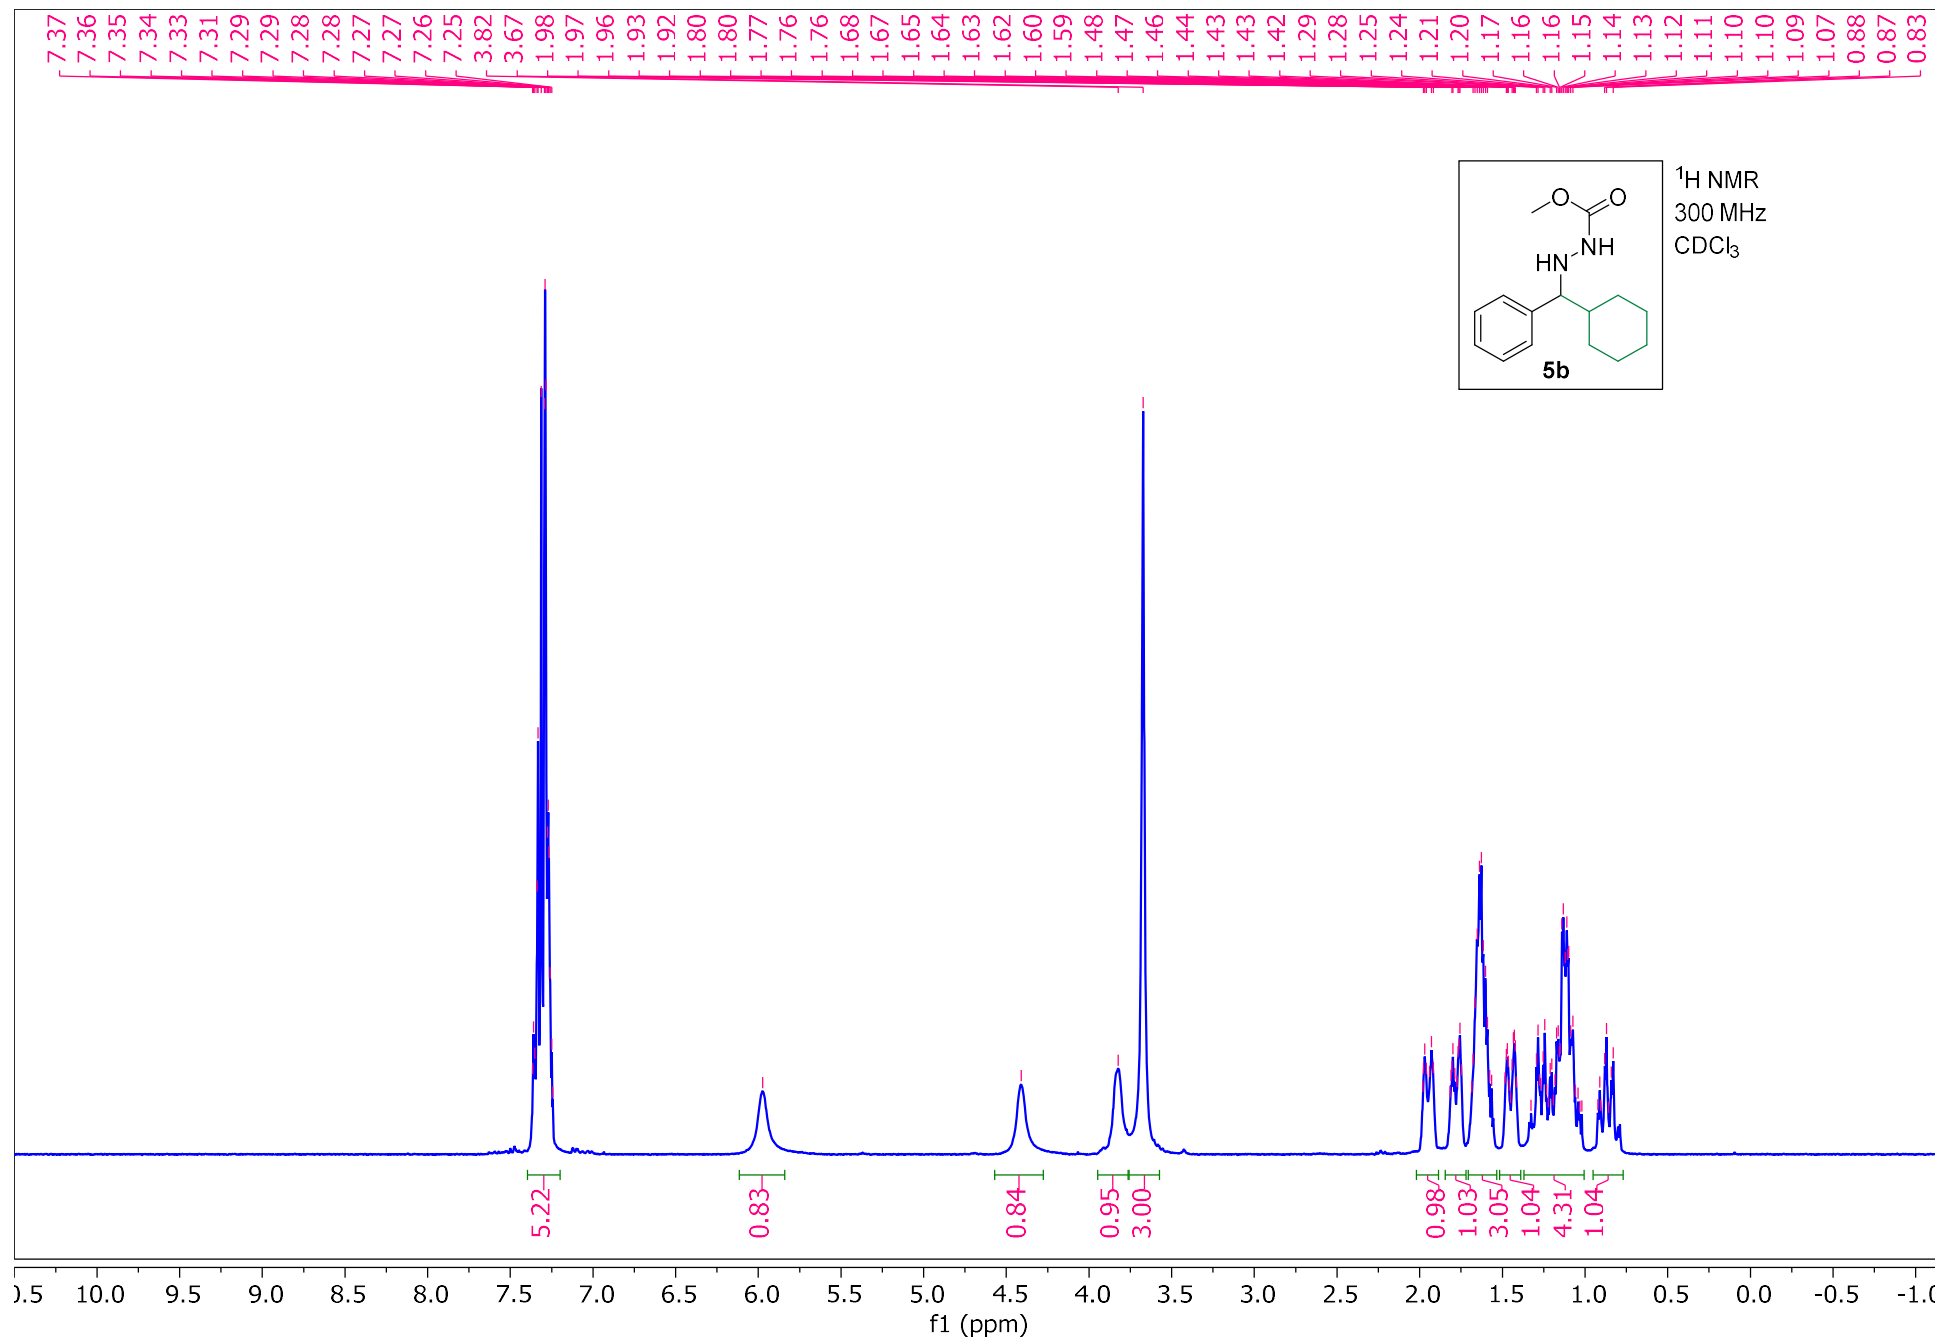

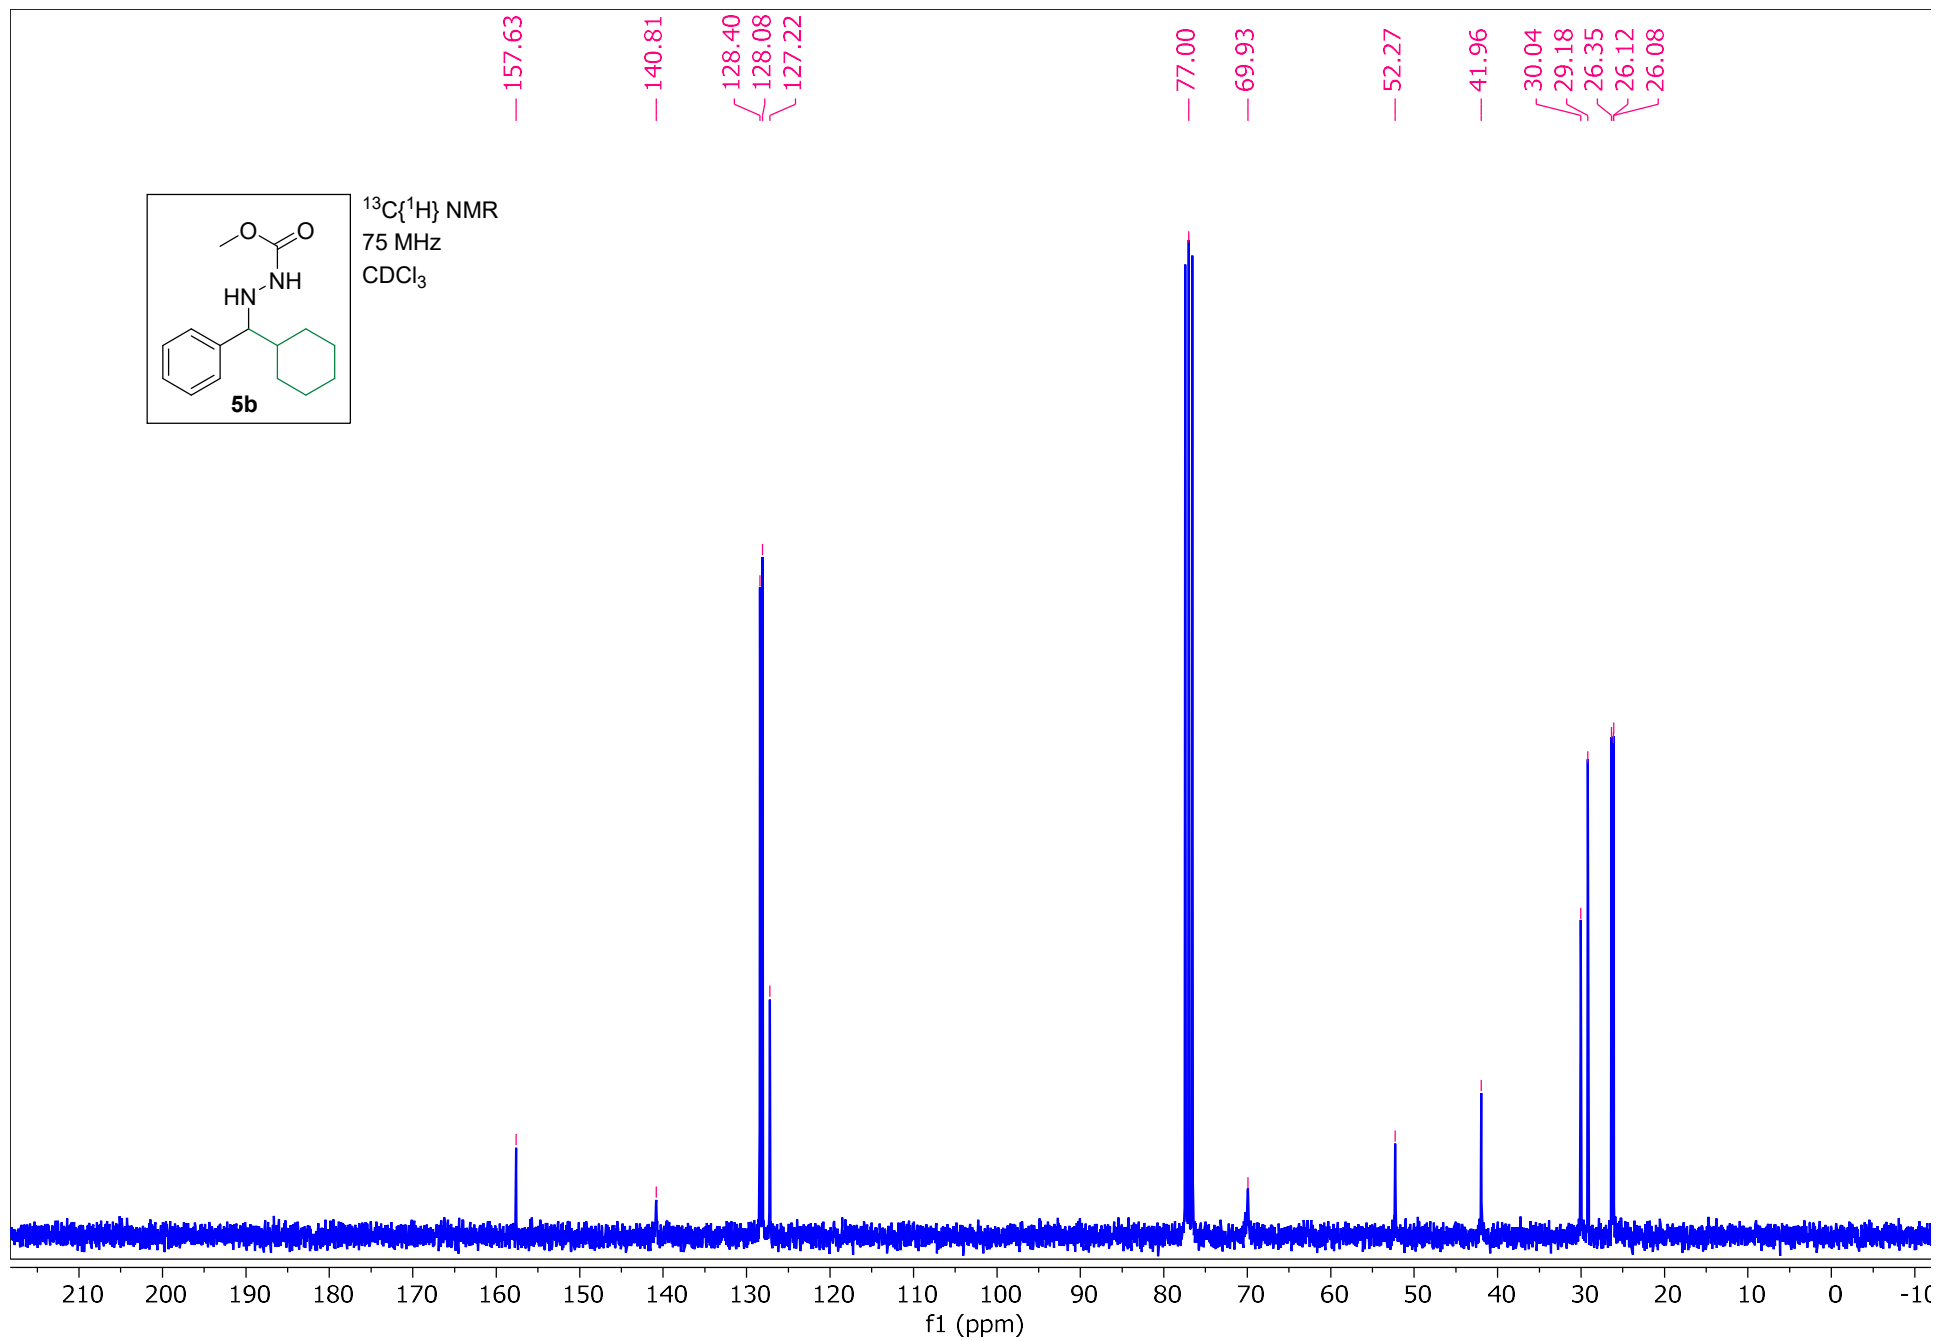

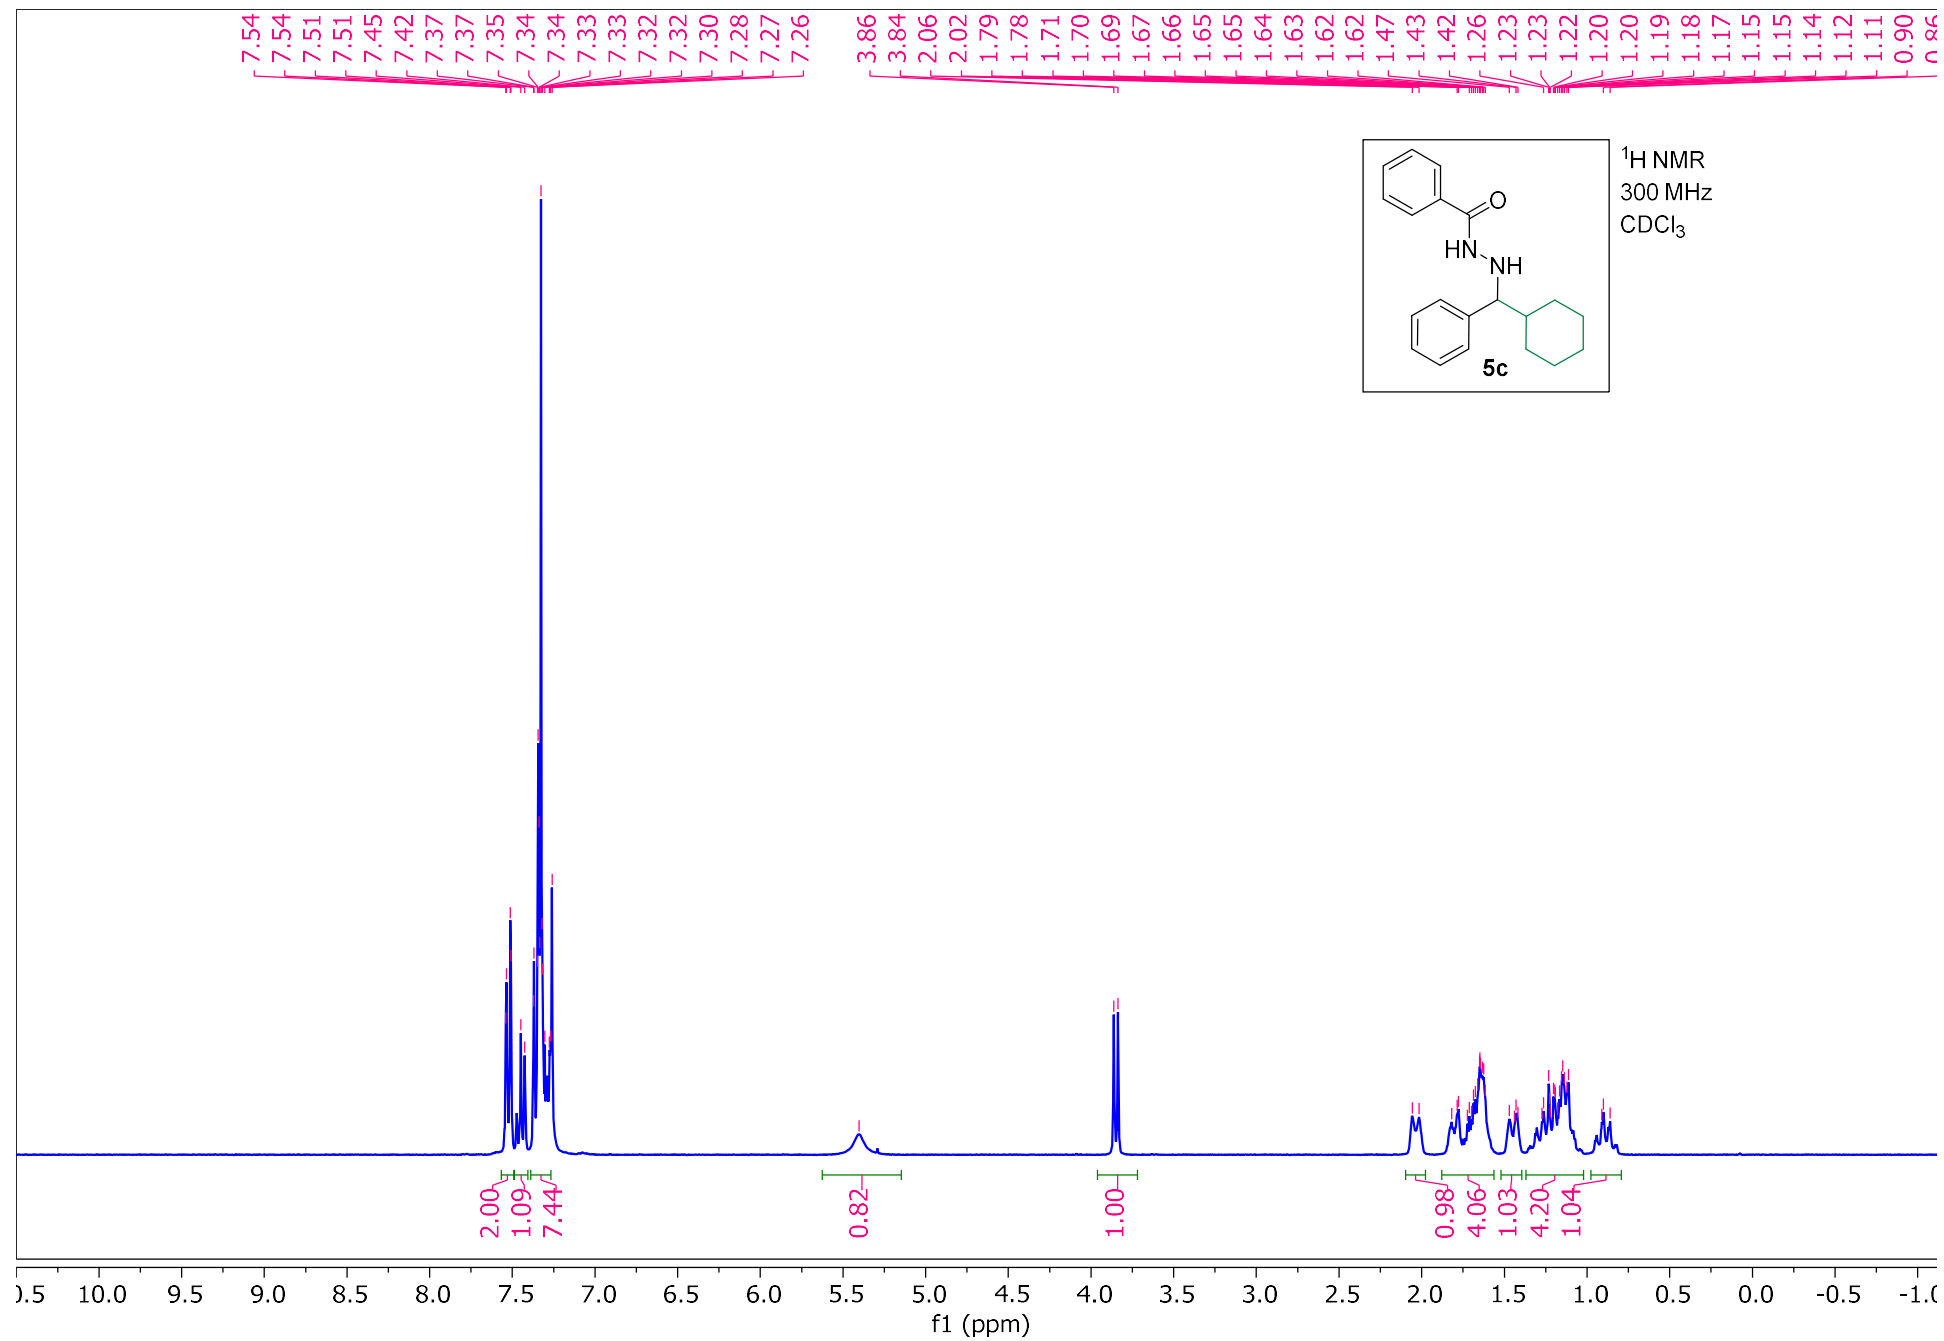

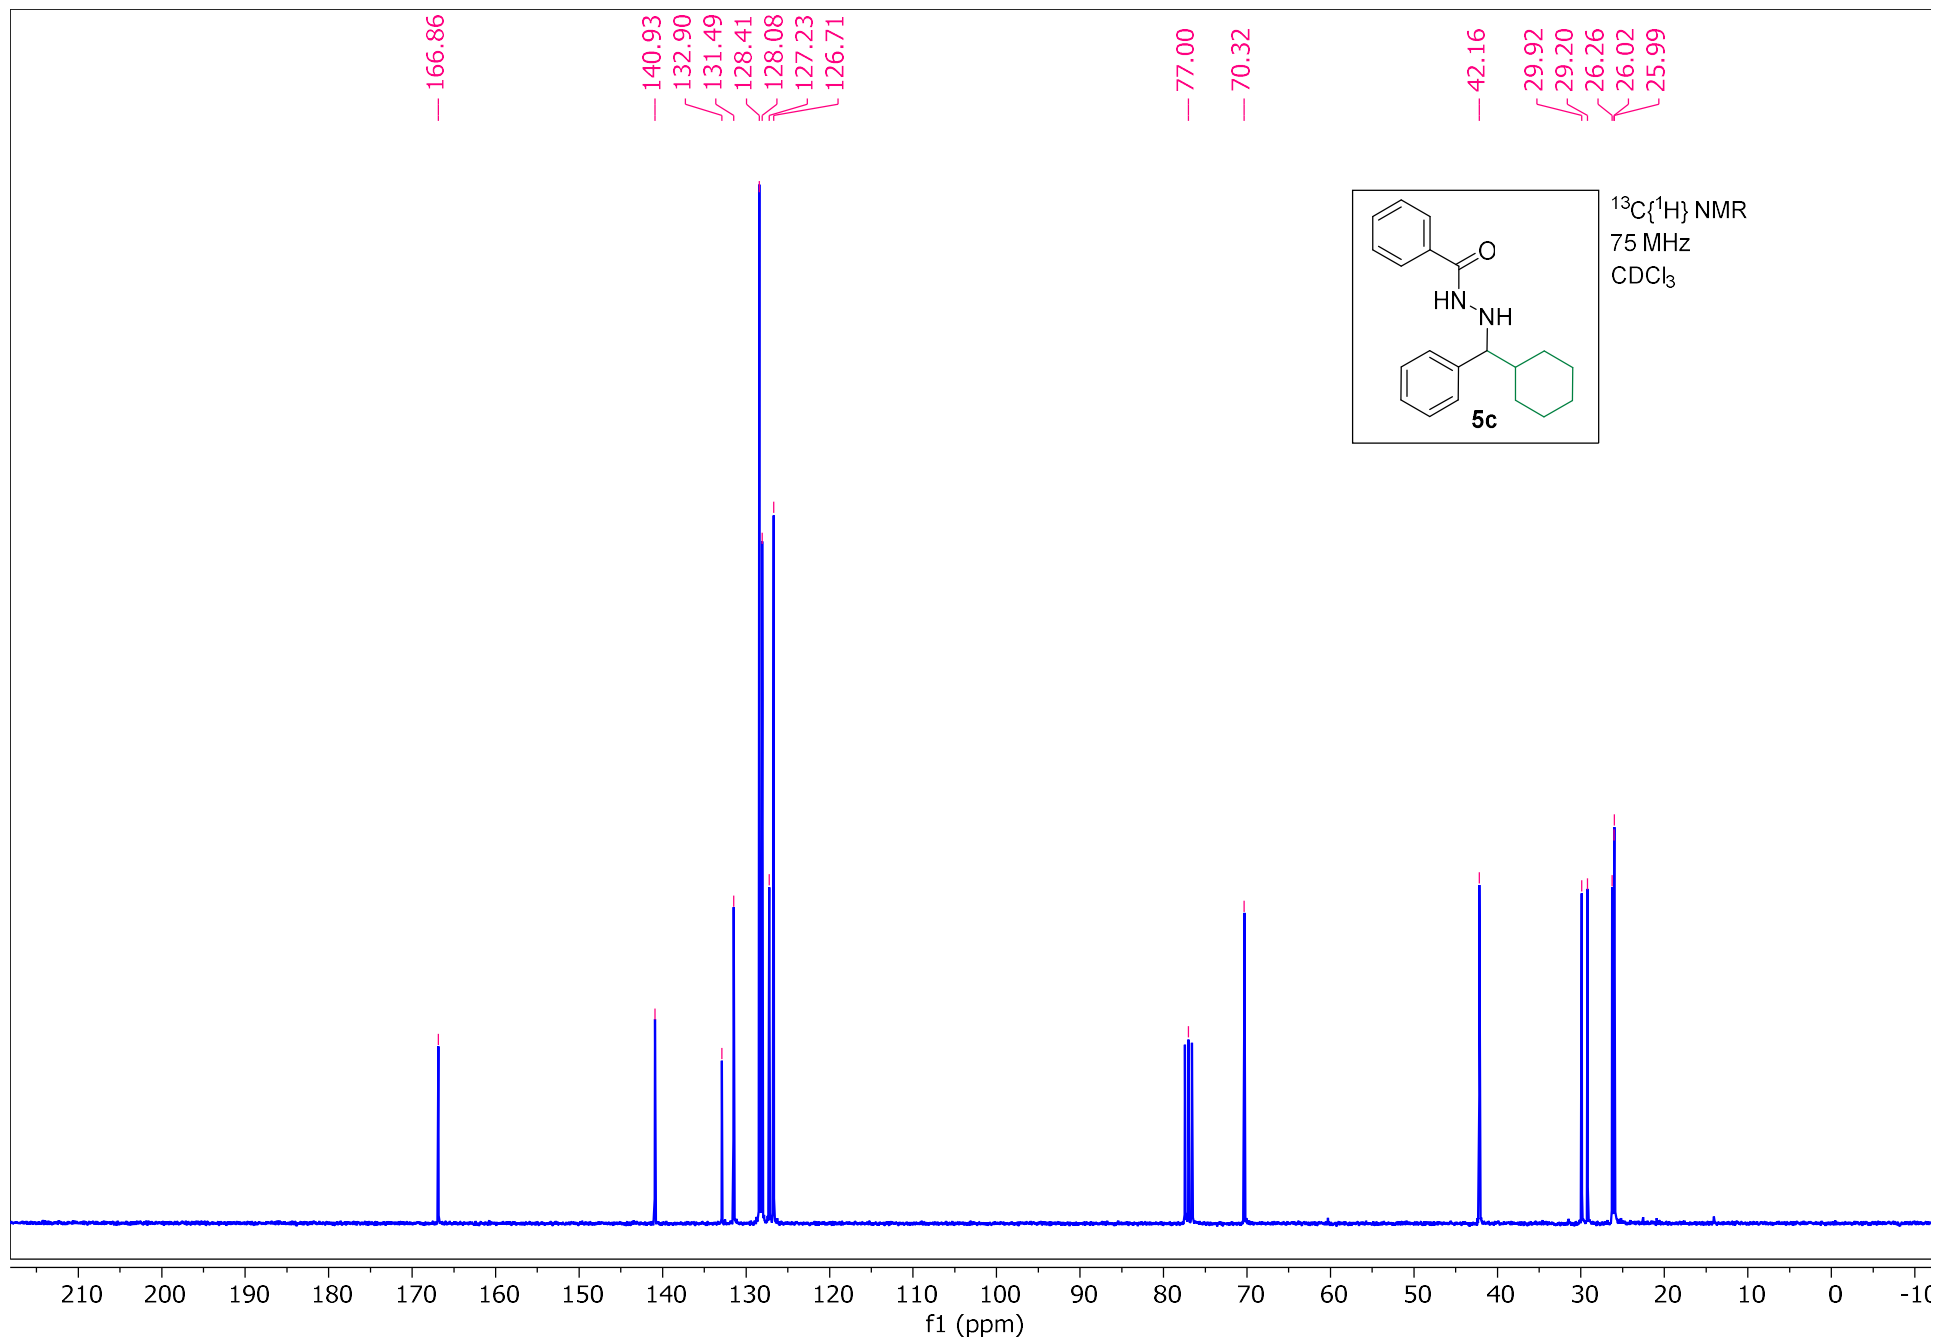

S143

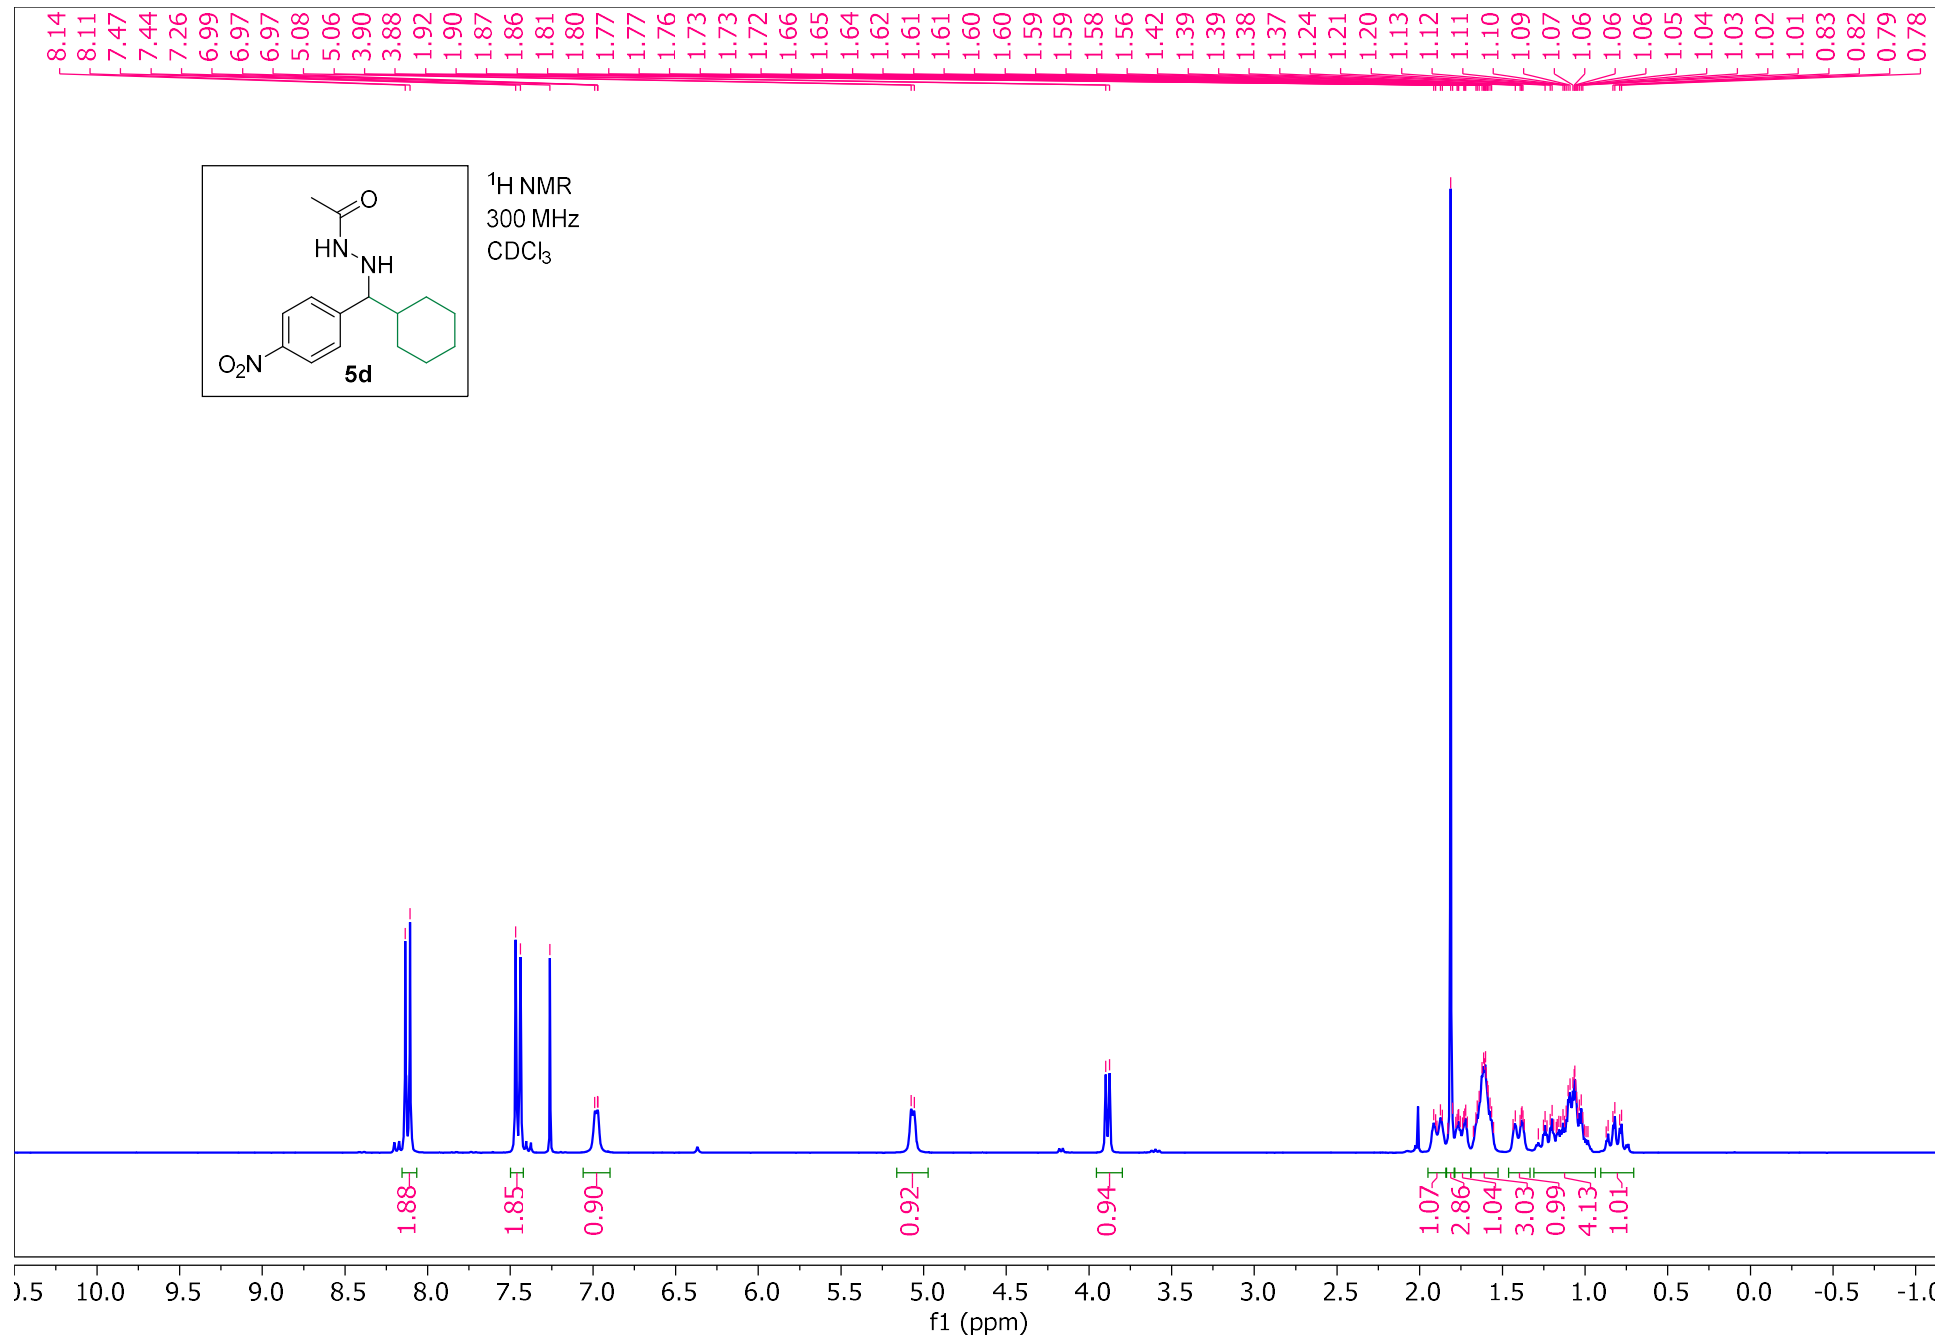

S144



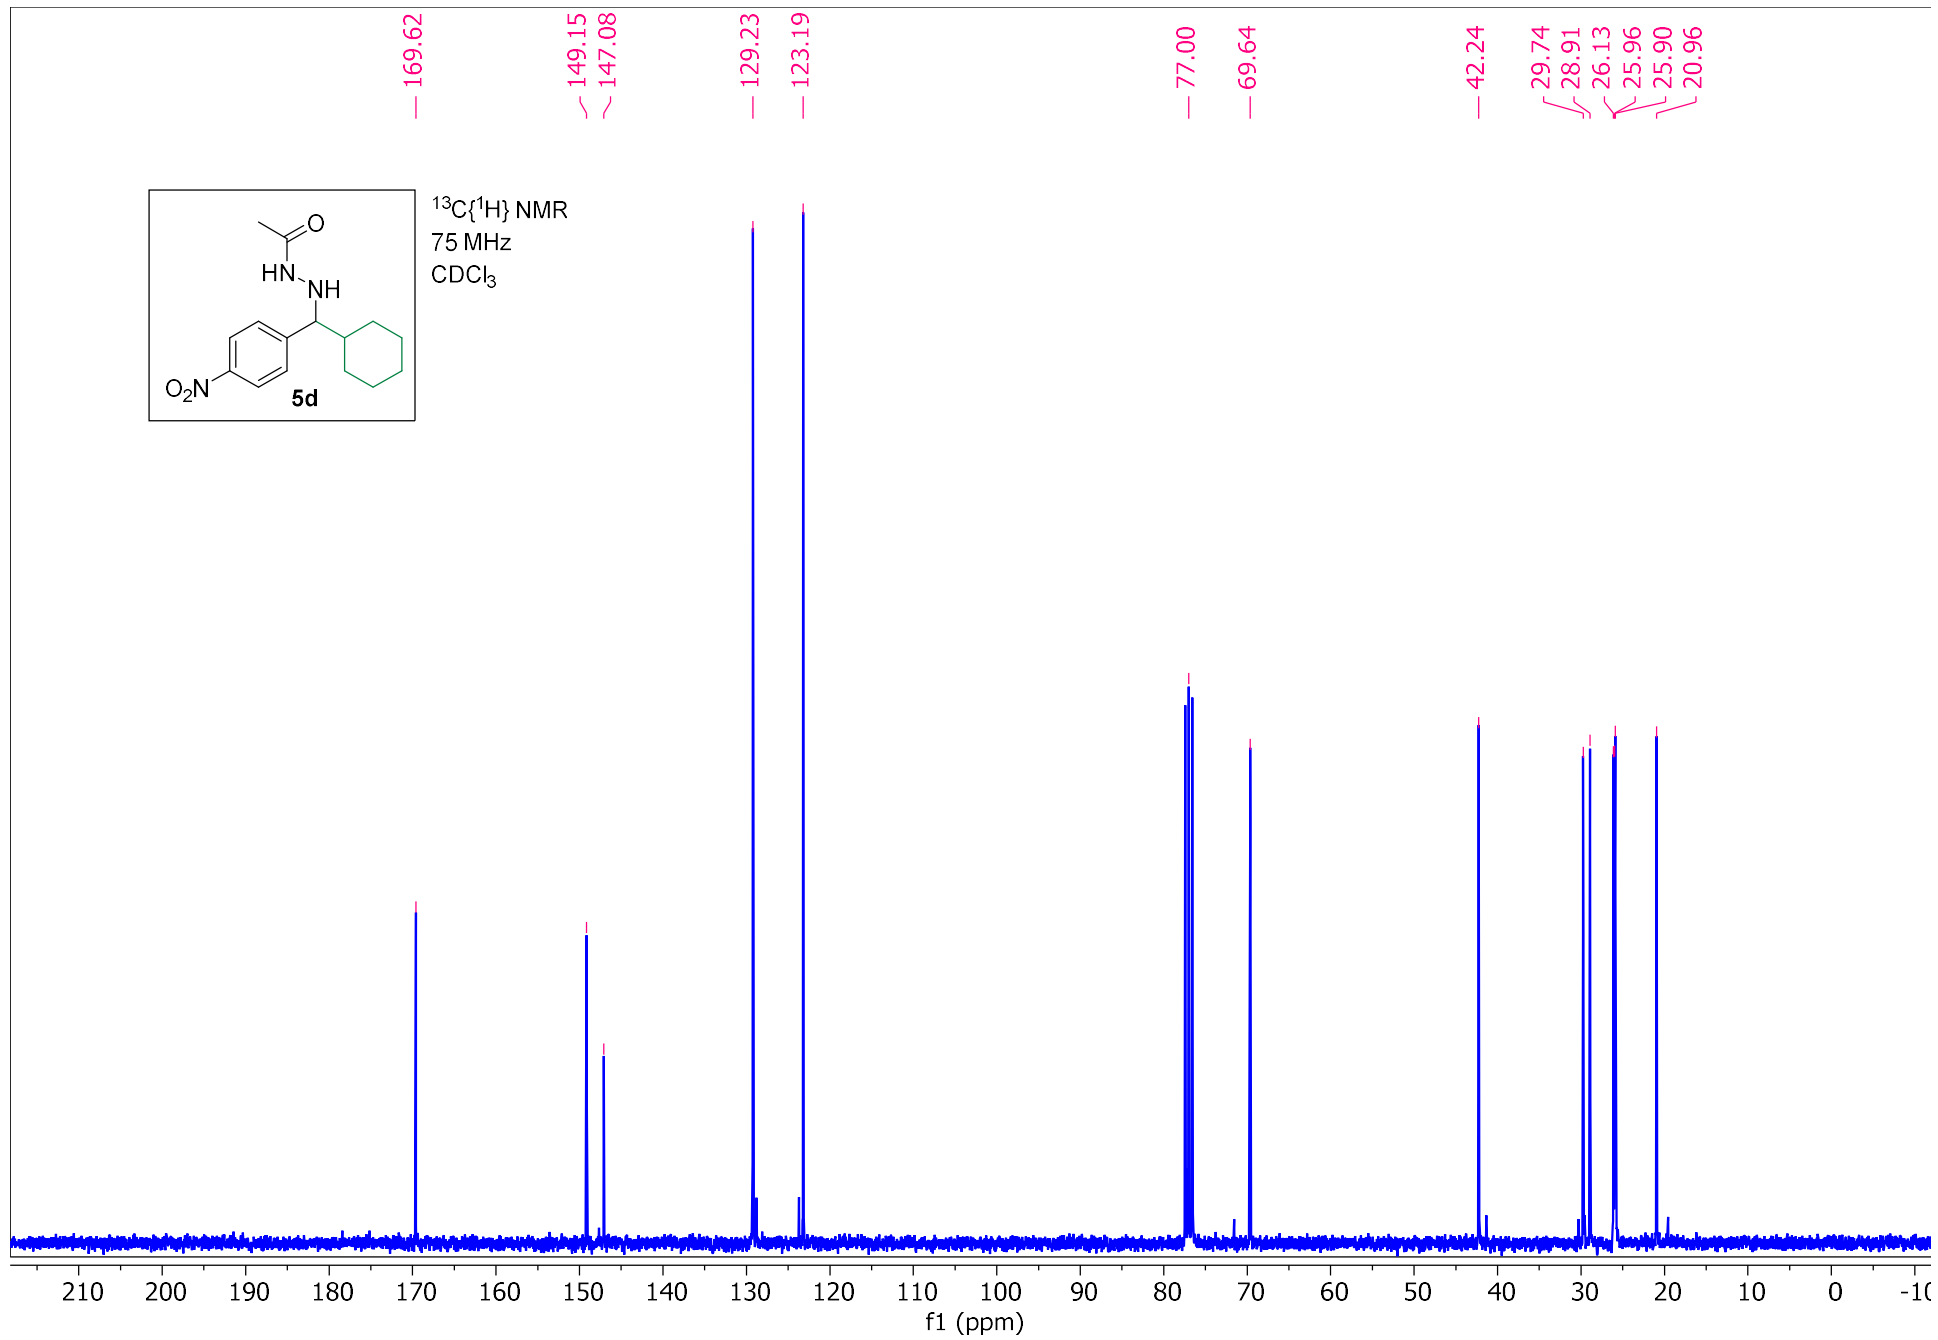

S145

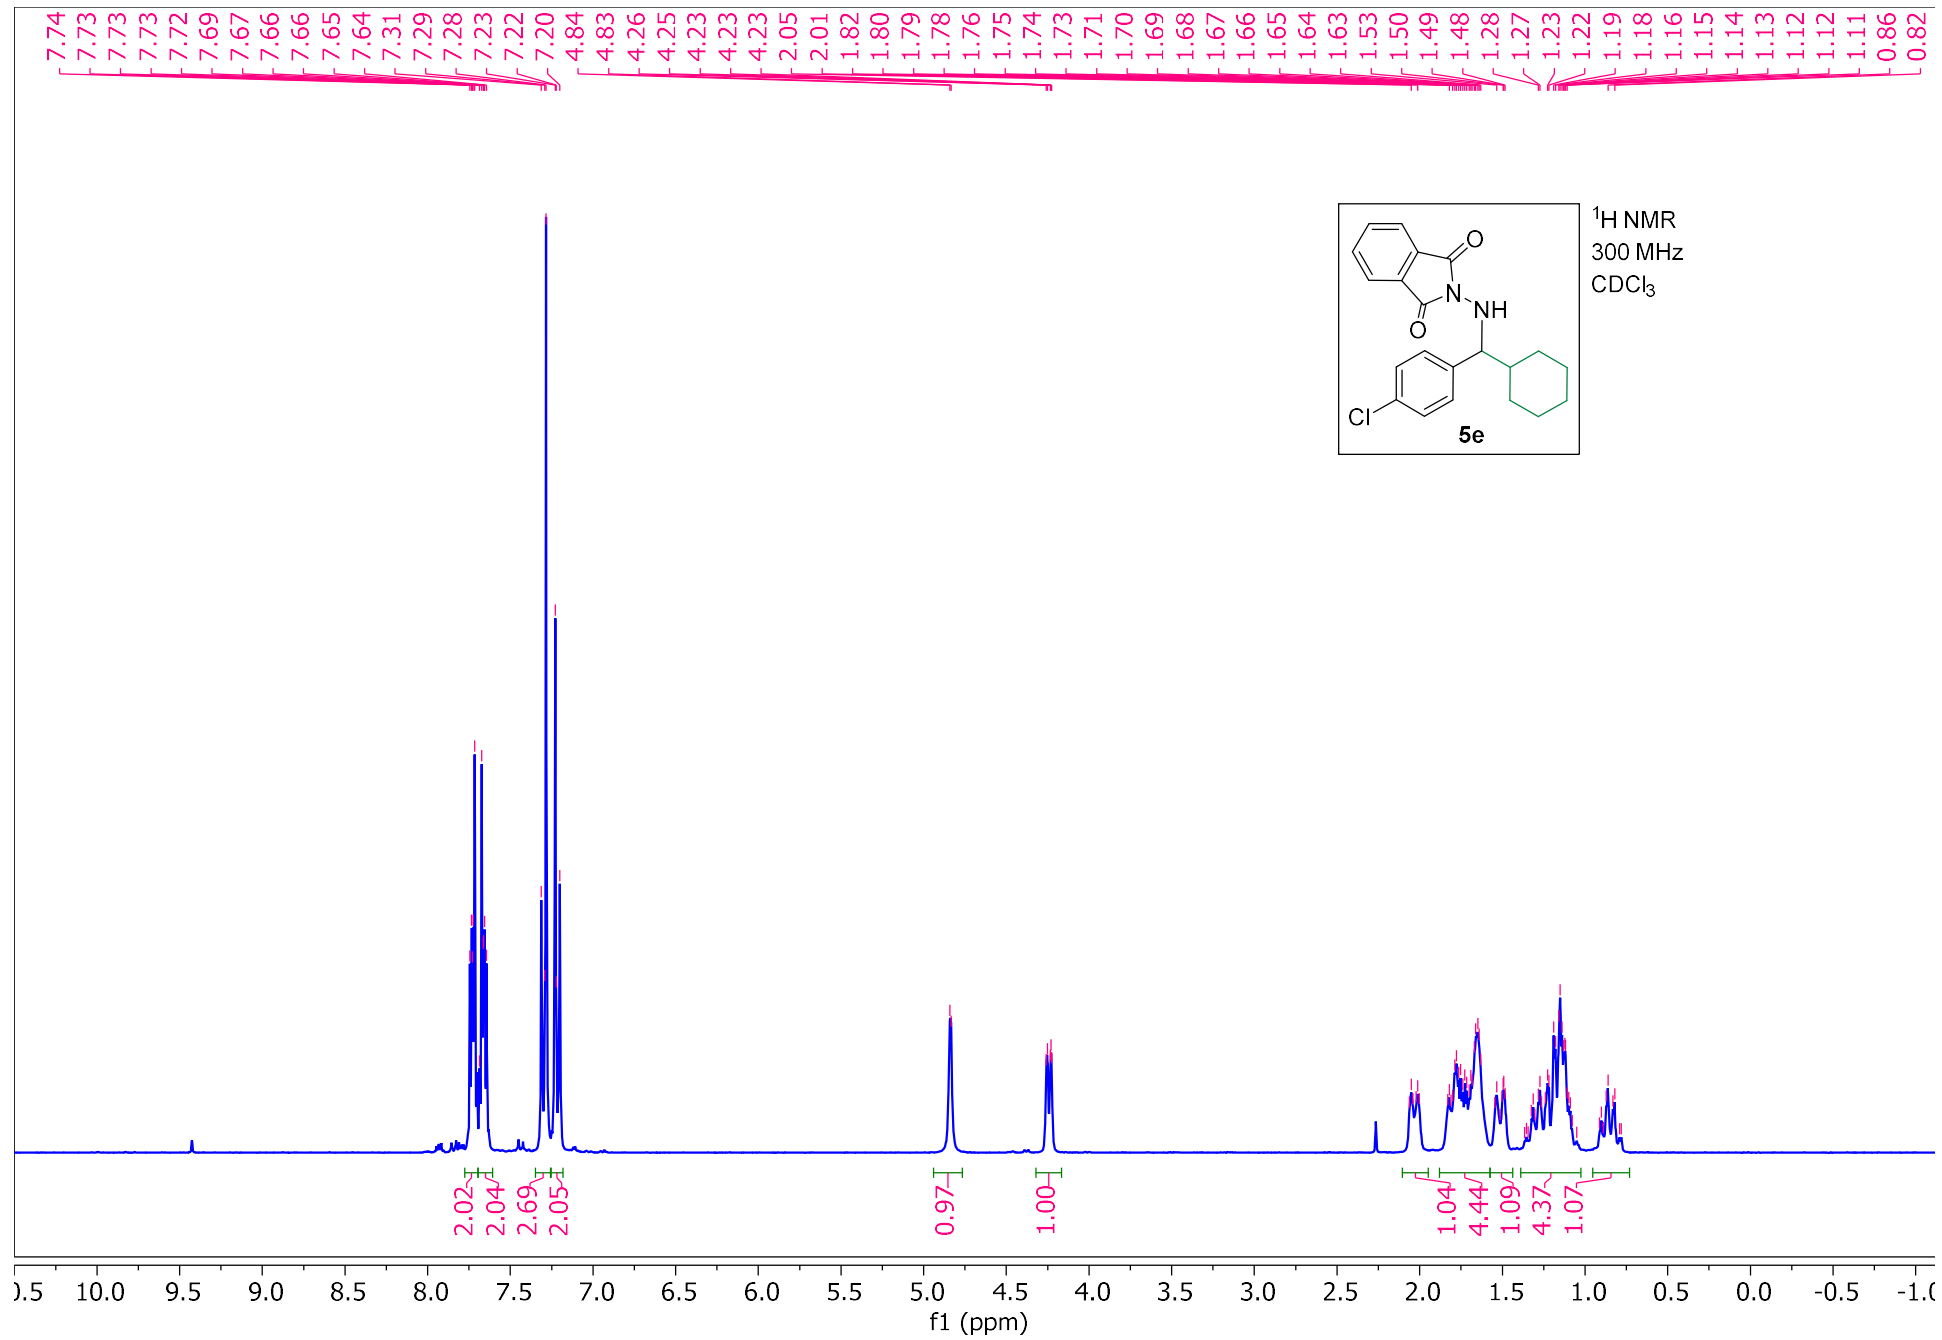

S146

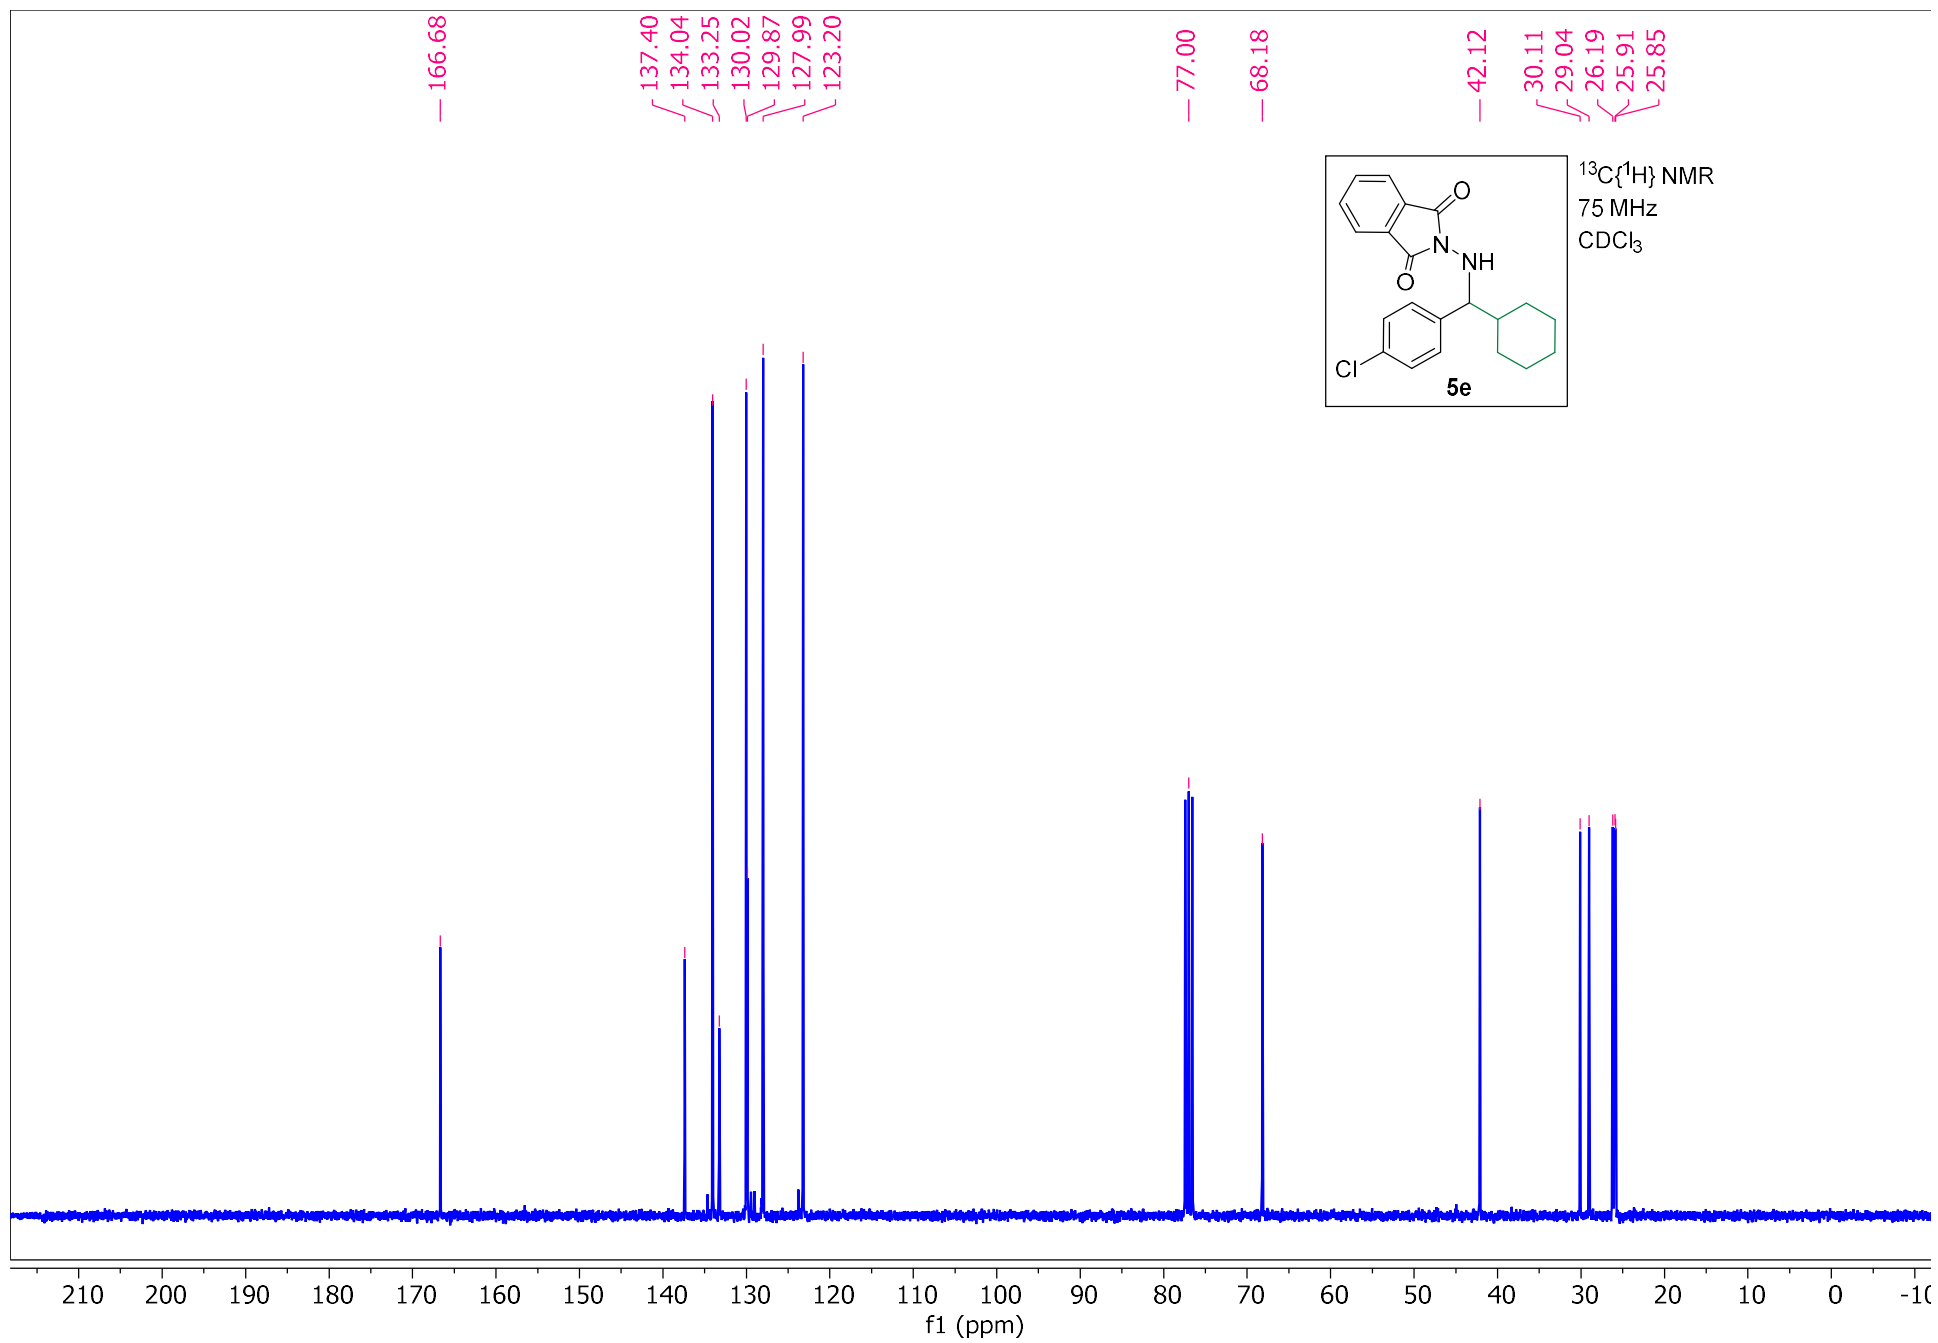

S147

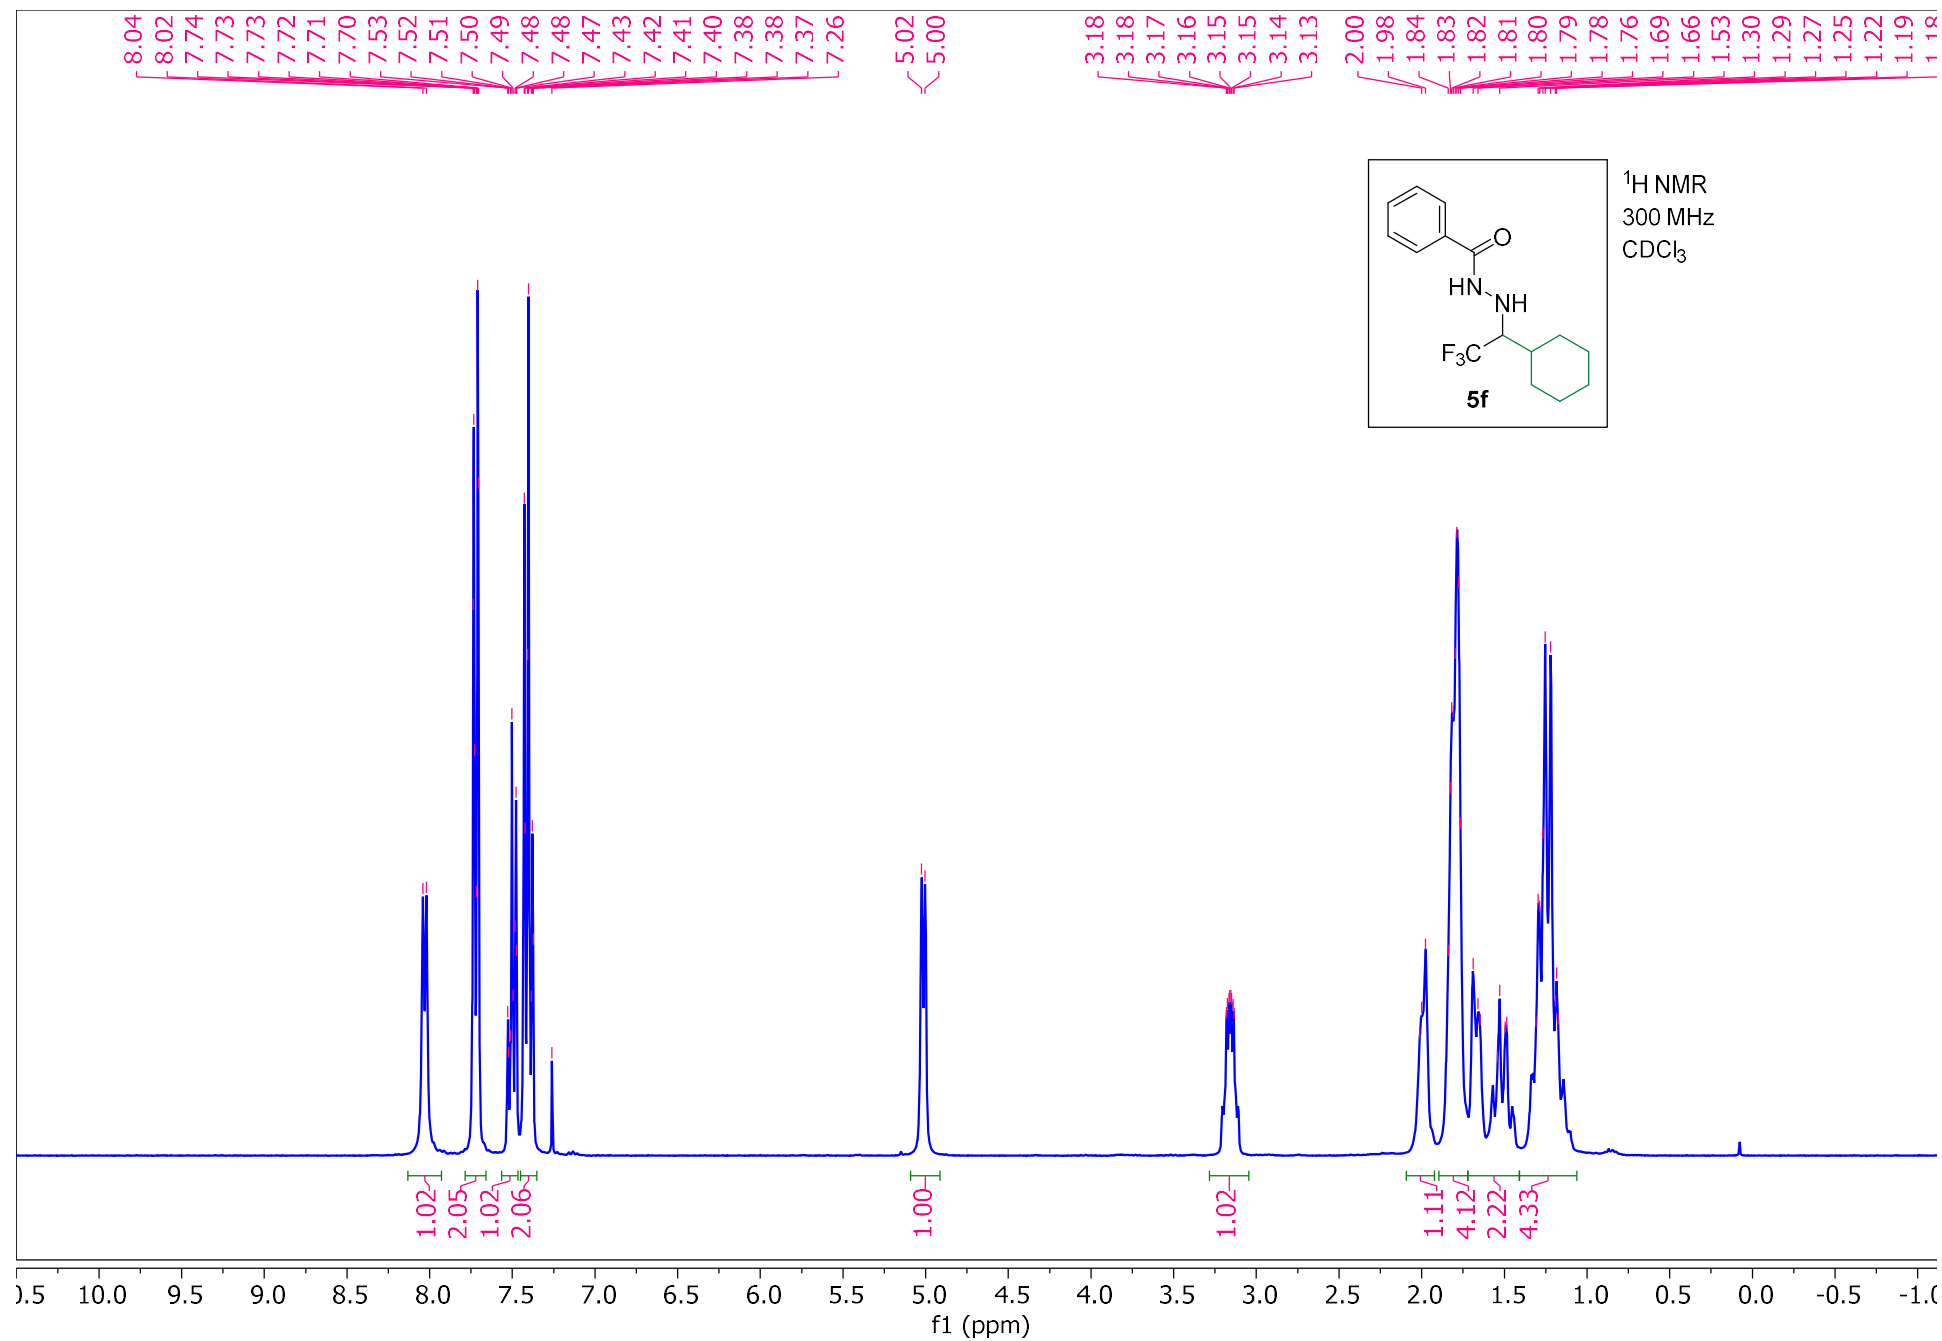

S148

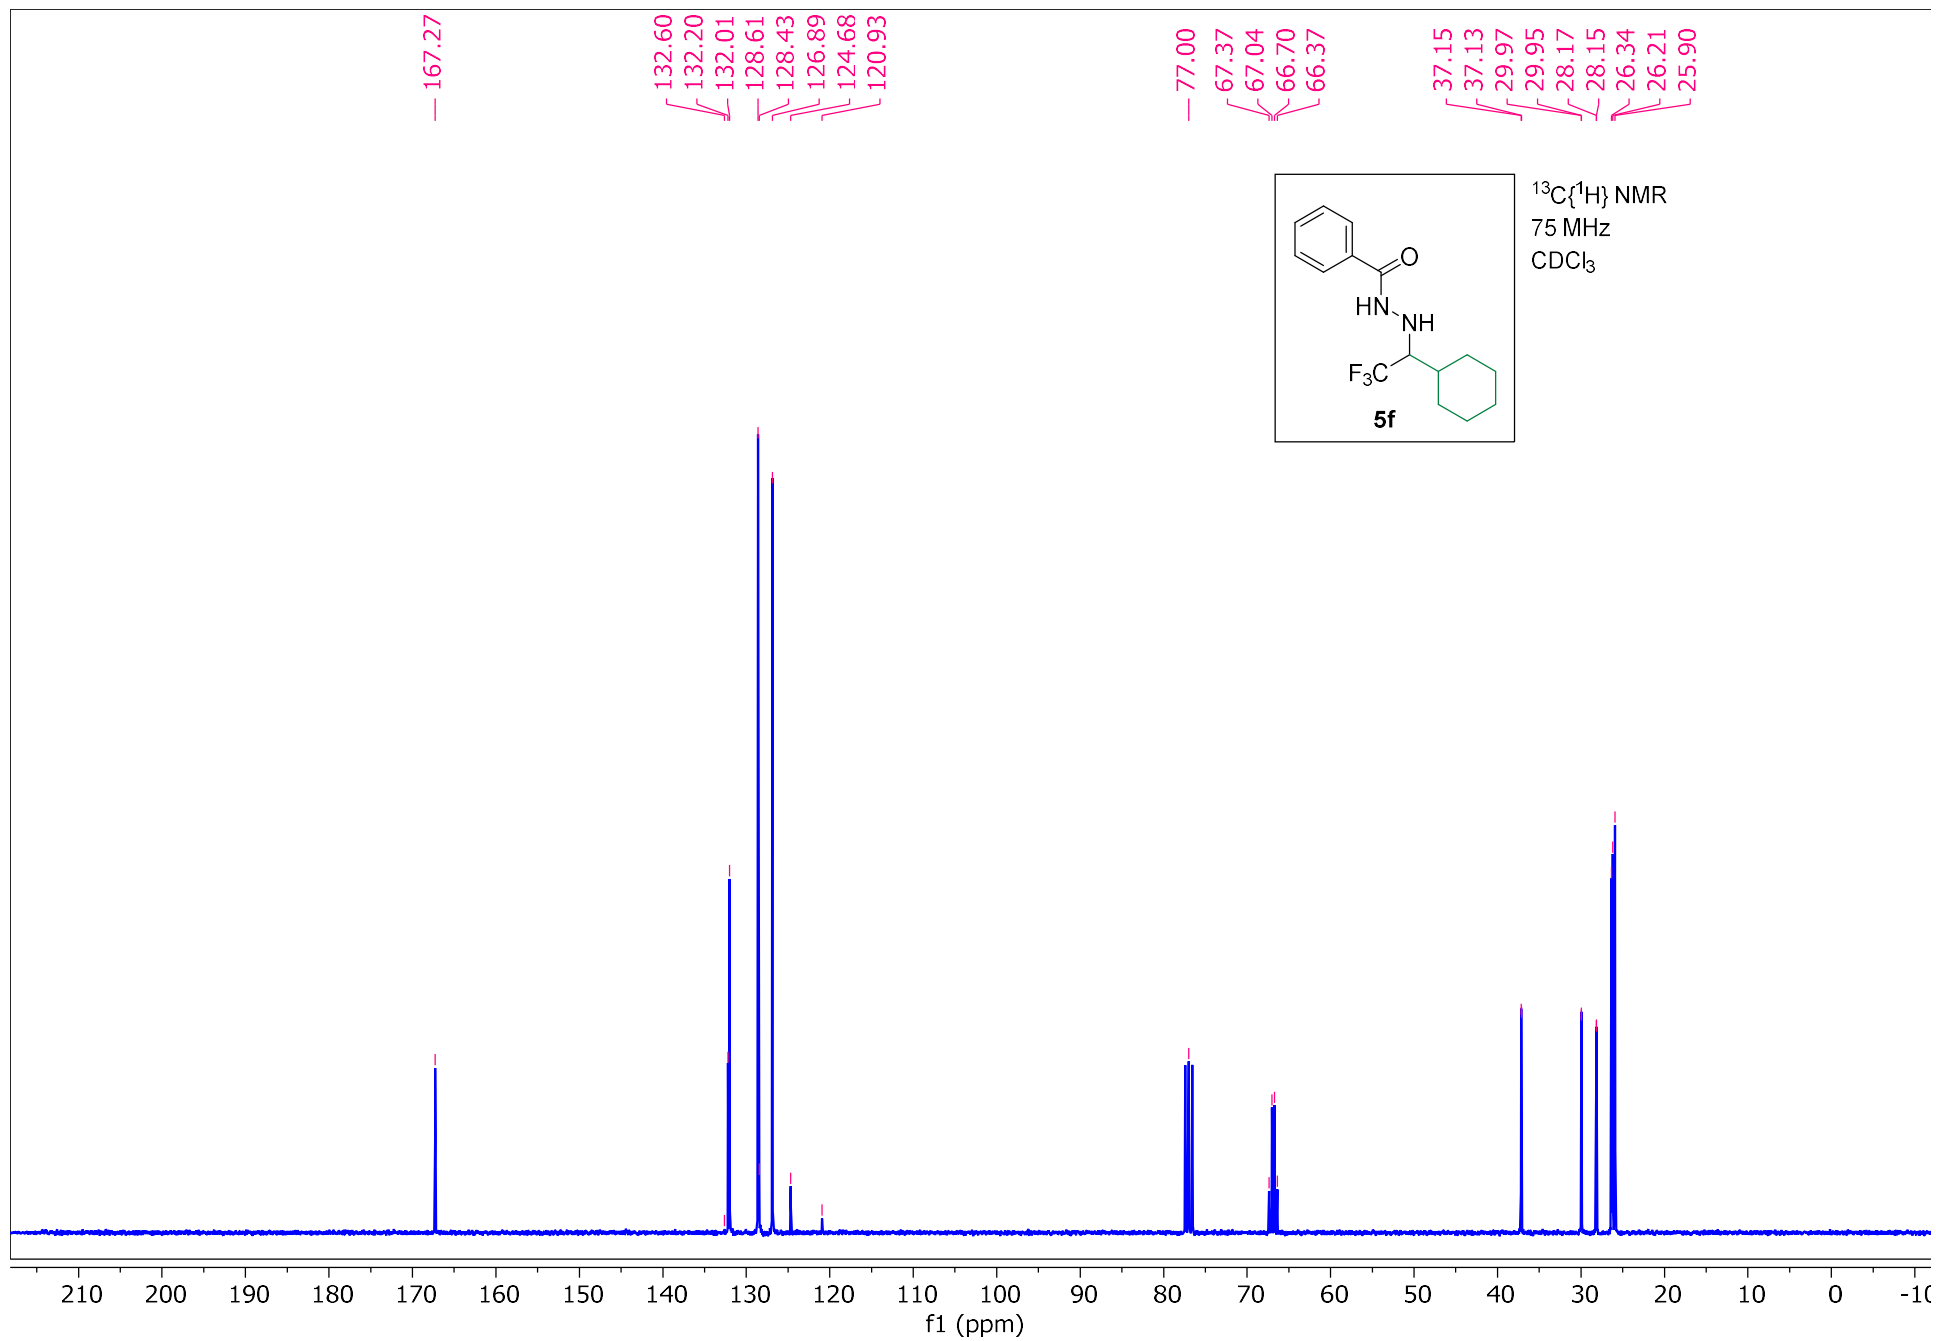

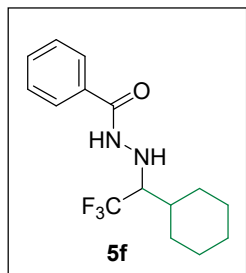

<sup>19</sup>F NMR  
271 MHz  
CDCl<sub>3</sub>

-70.68  
-70.71

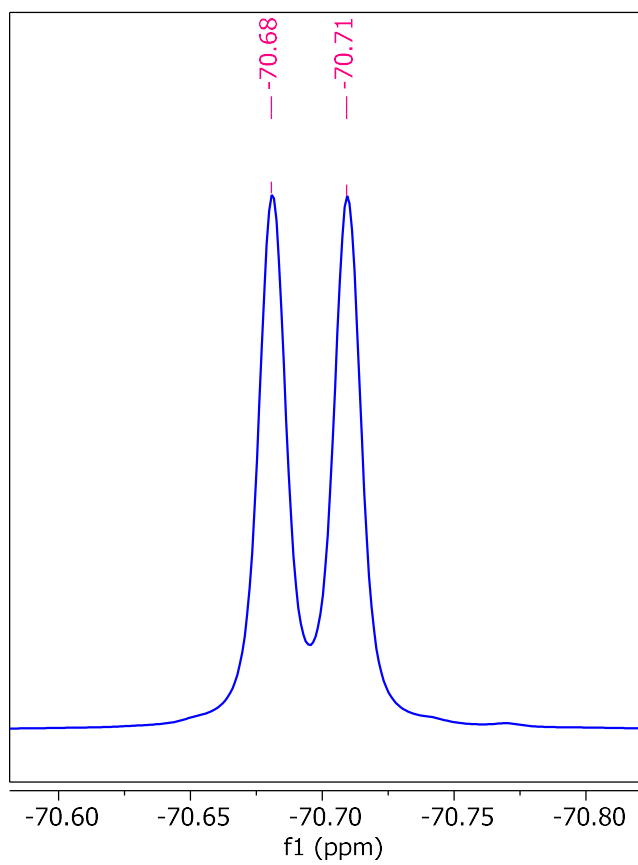

20 10 0 -10 -20 -30 -40 -50 -60 -70 -80 -90 -100 -110 -120 -130 -140 -150 -160 -170 -180 -190 -200 -210 -220

f1 (ppm)

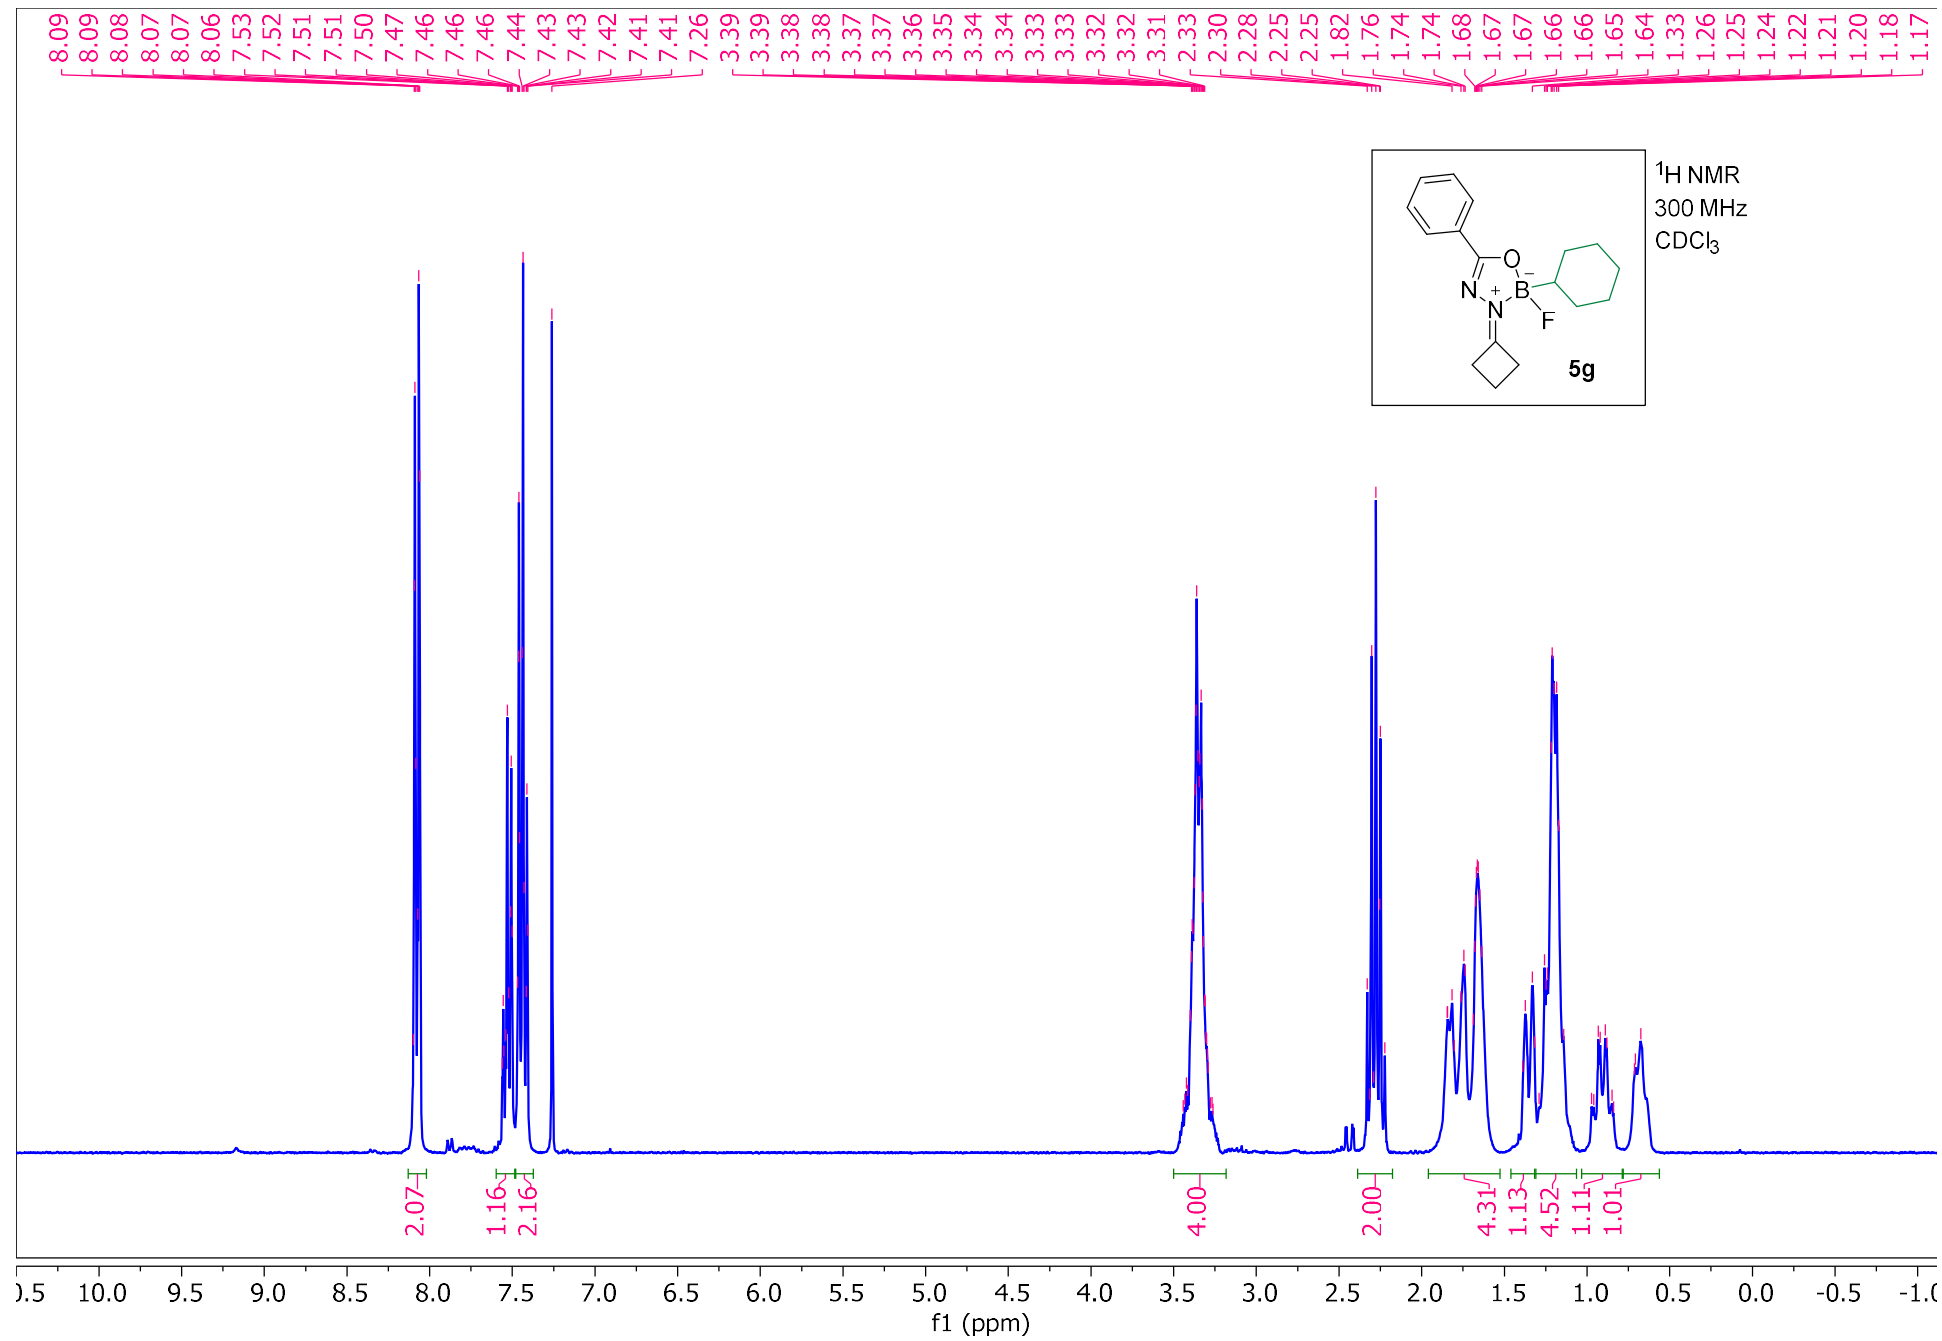

S151

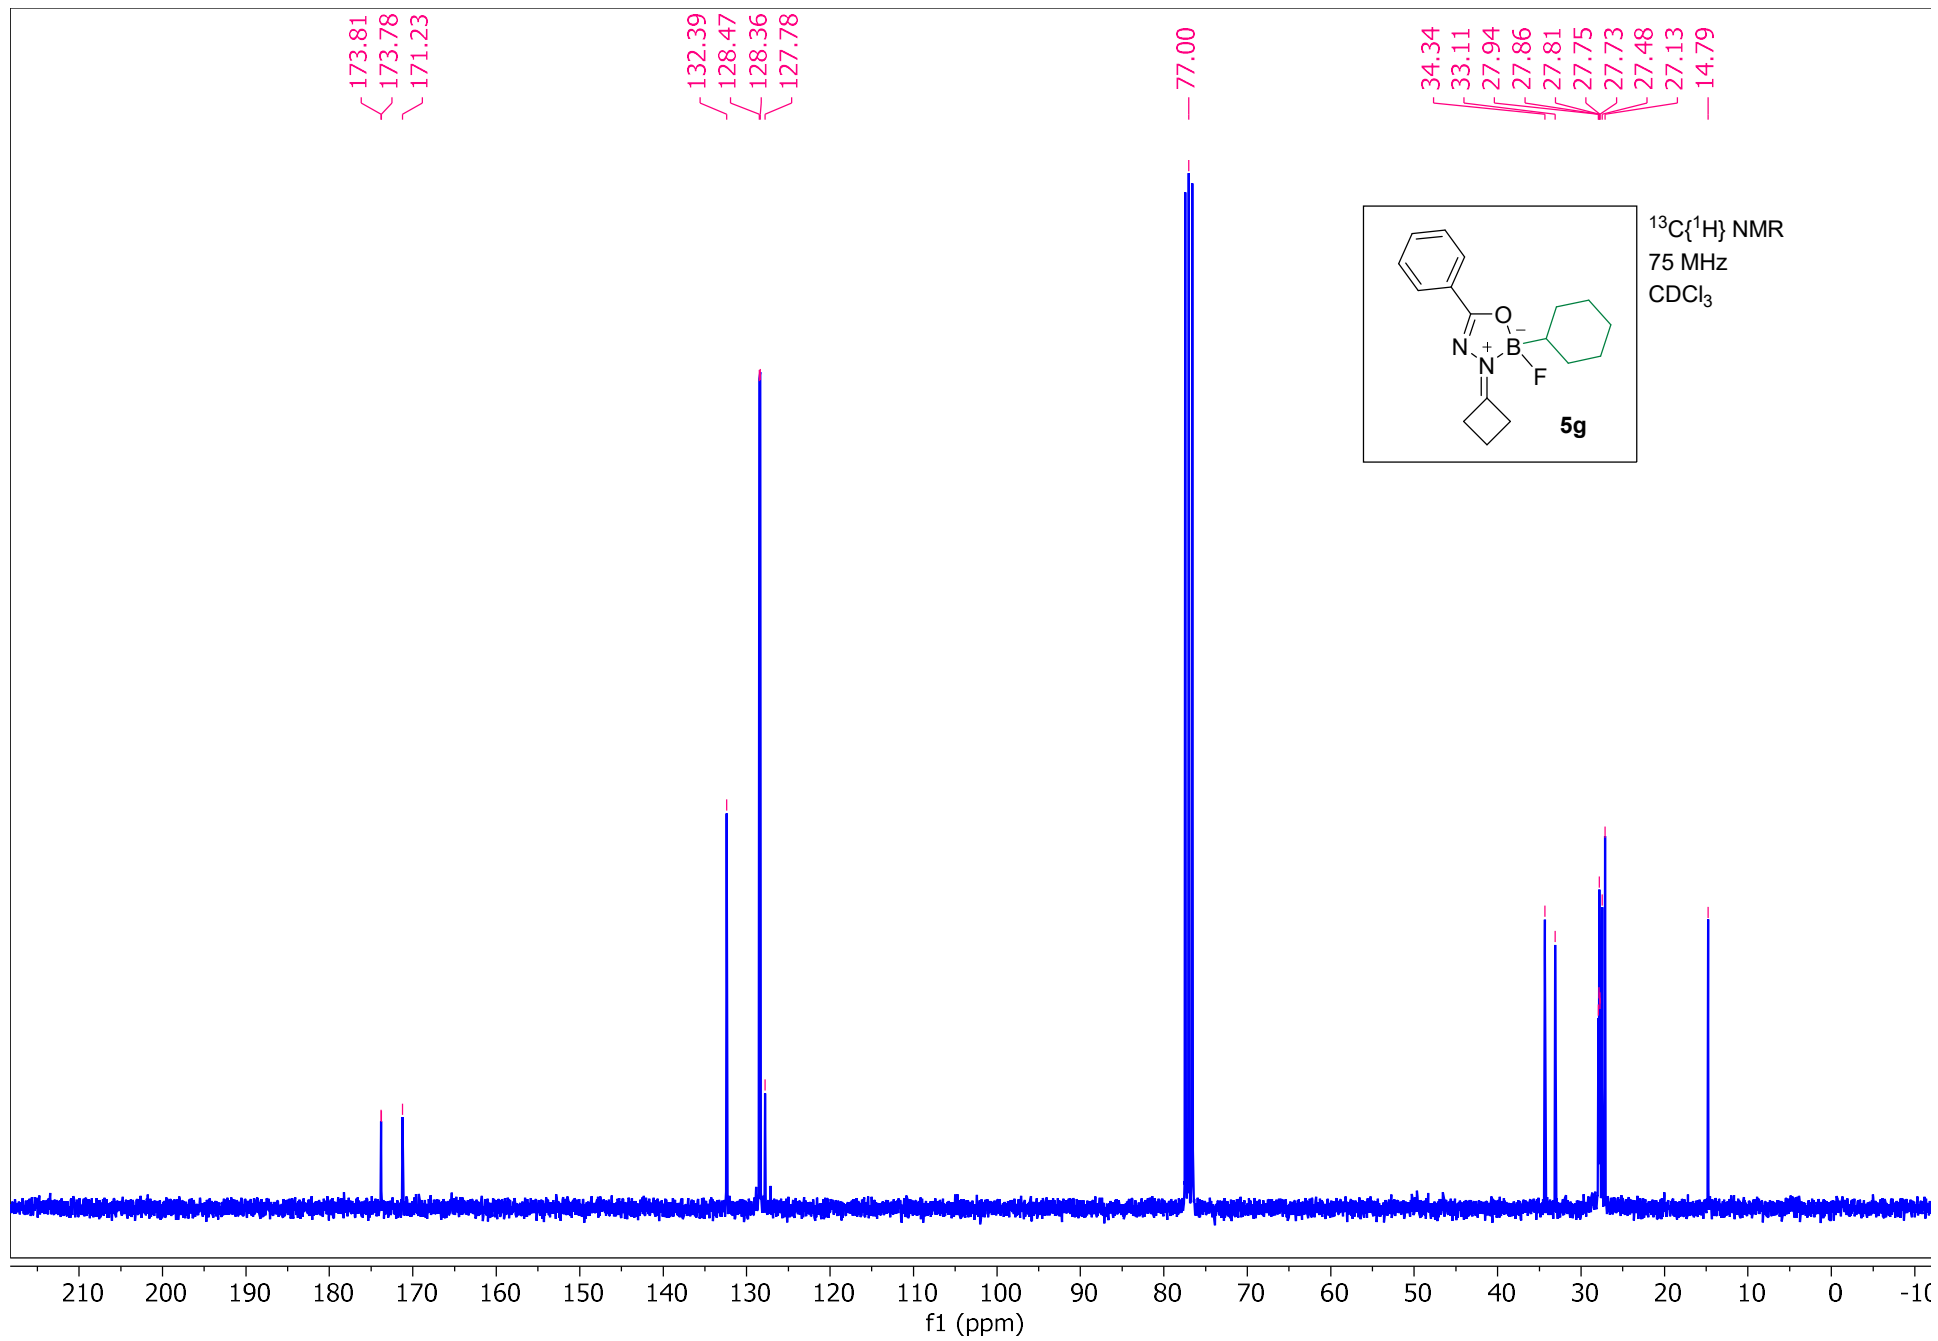

S152



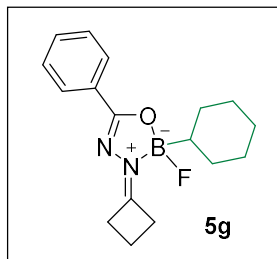

$^{19}\text{F}$  NMR  
282 MHz  
 $\text{CDCl}_3$

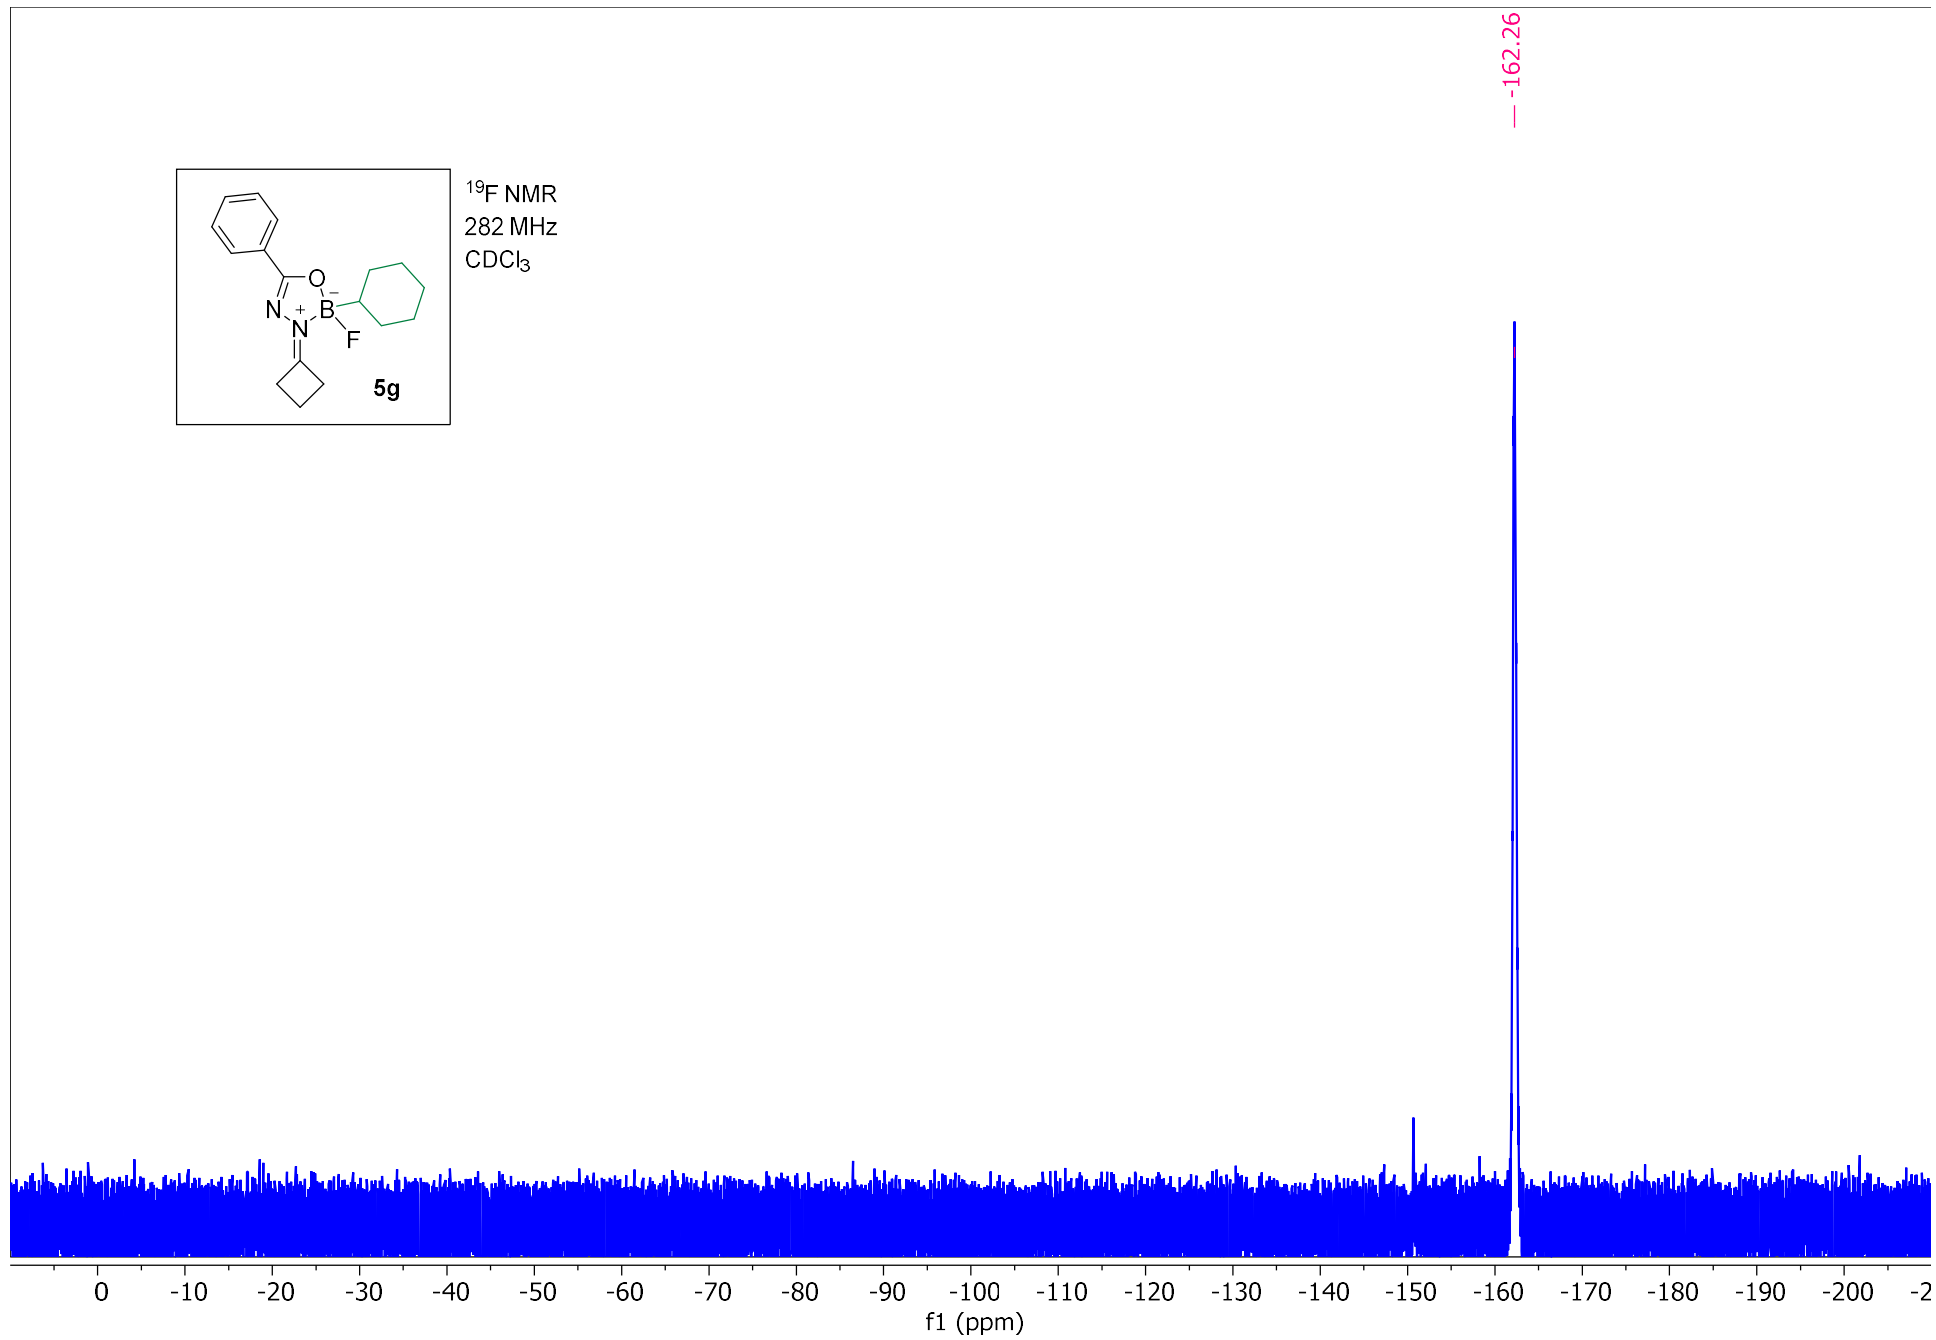

S153

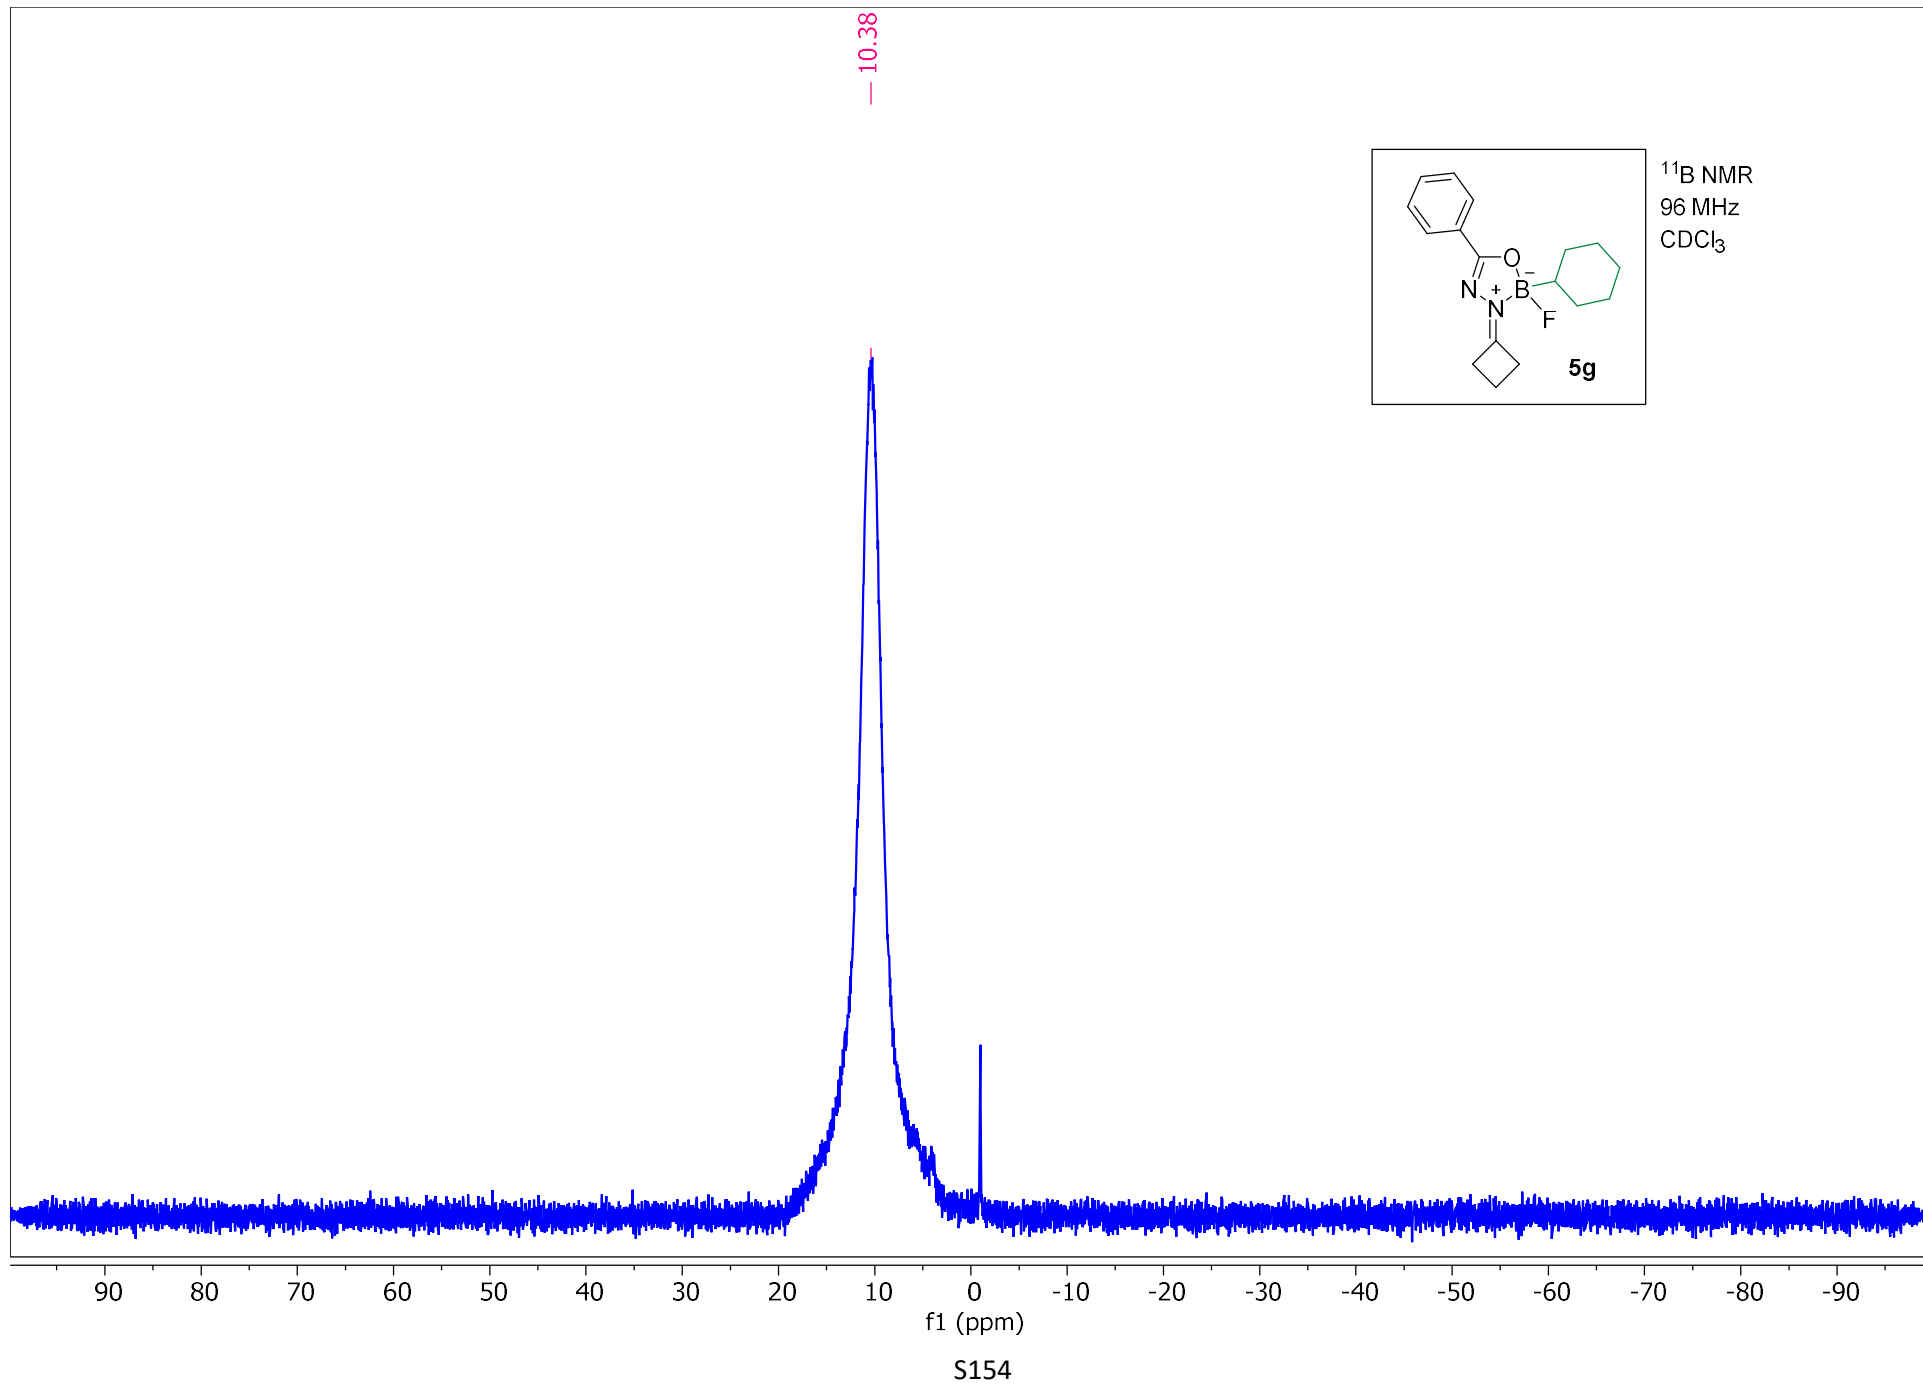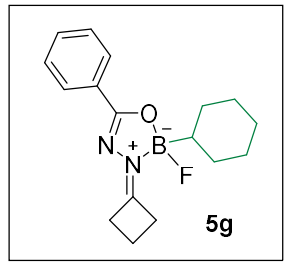

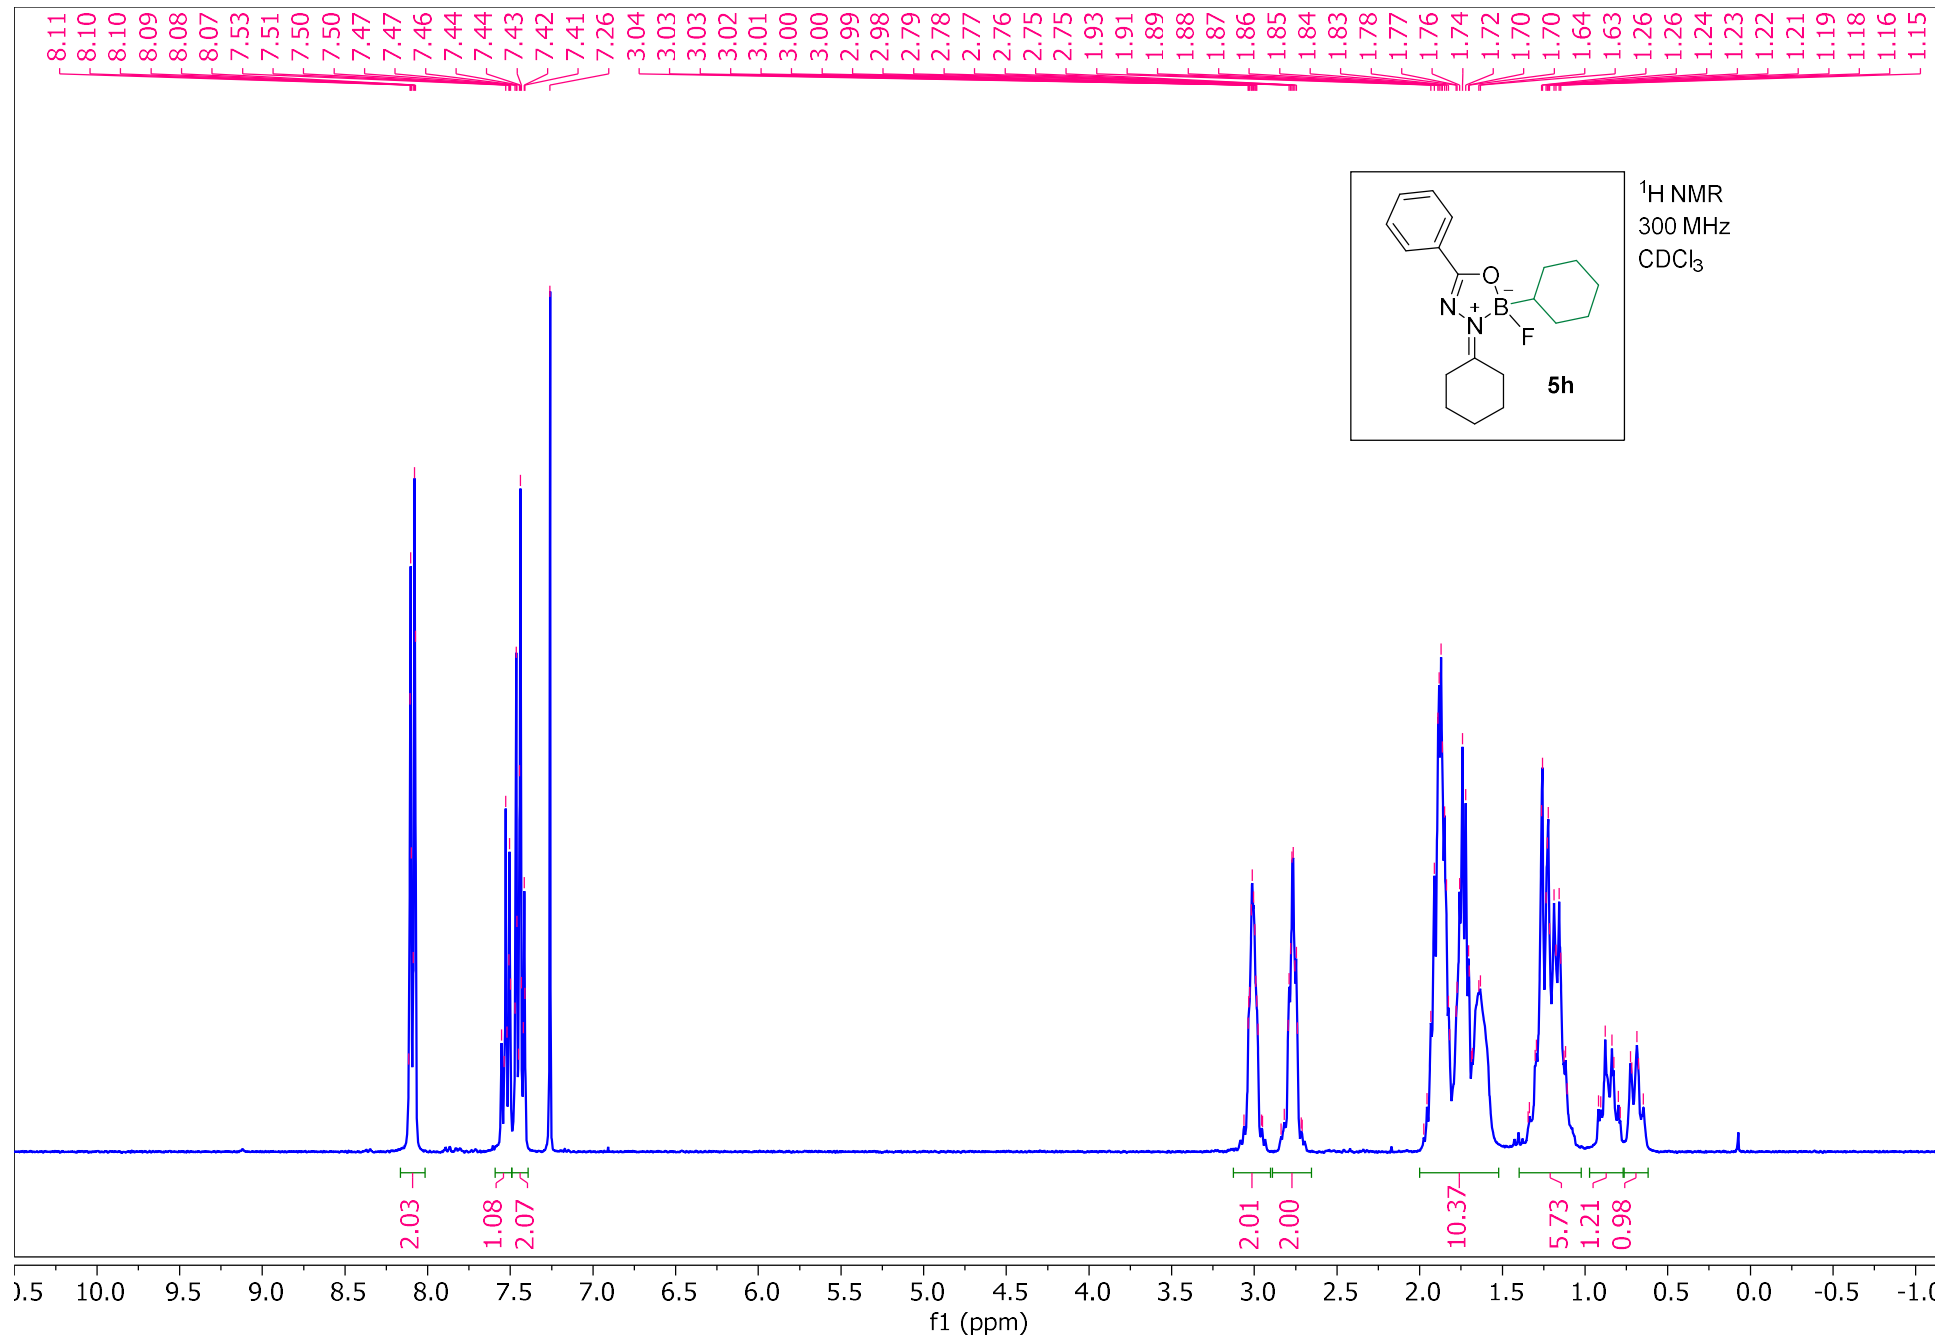

S155

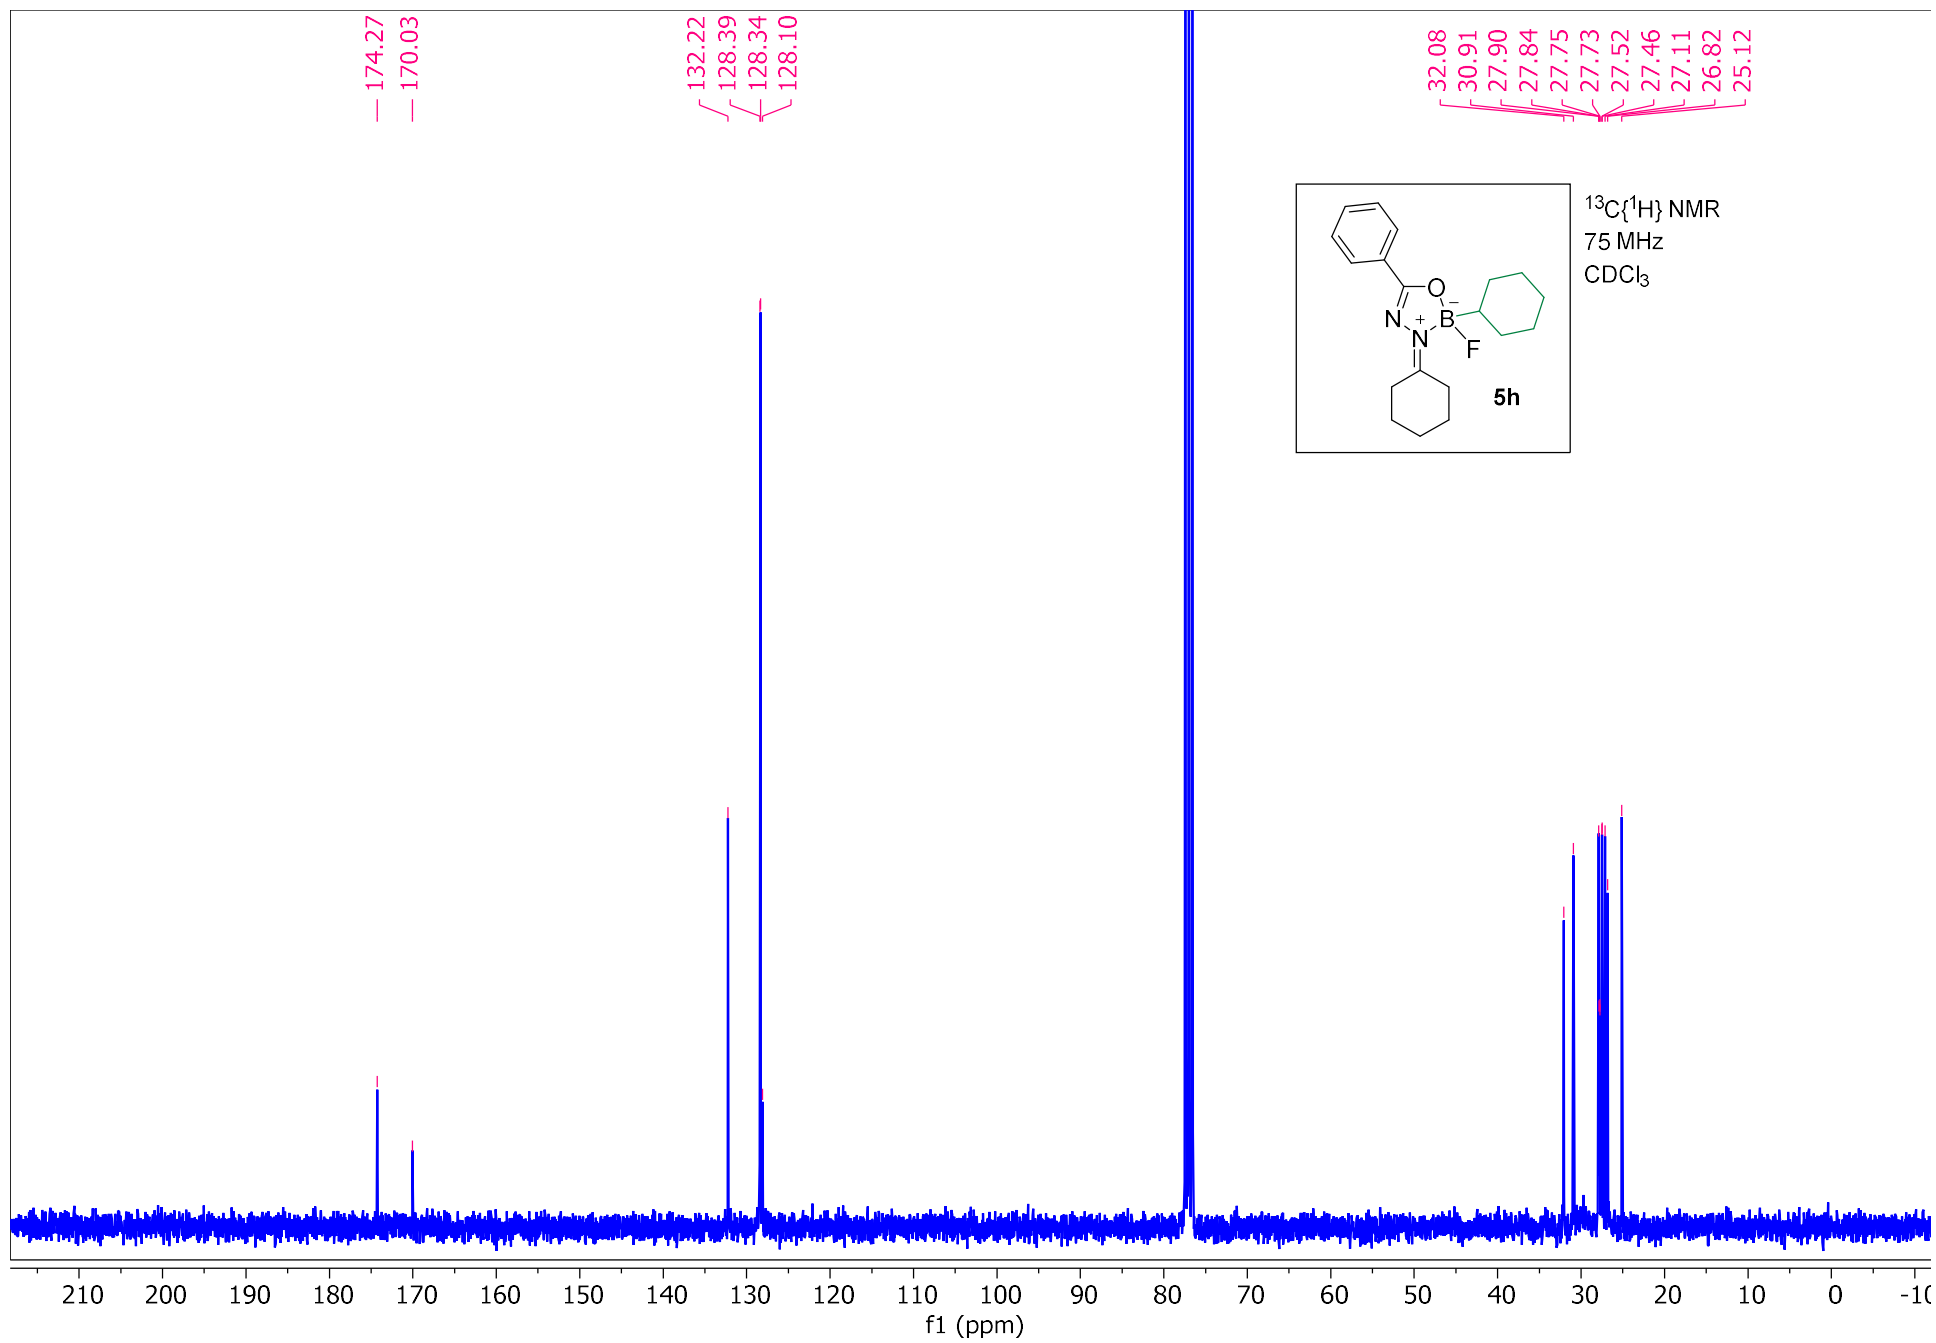

S156

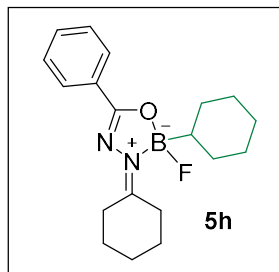

$^{19}\text{F}$  NMR  
282 MHz  
 $\text{CDCl}_3$

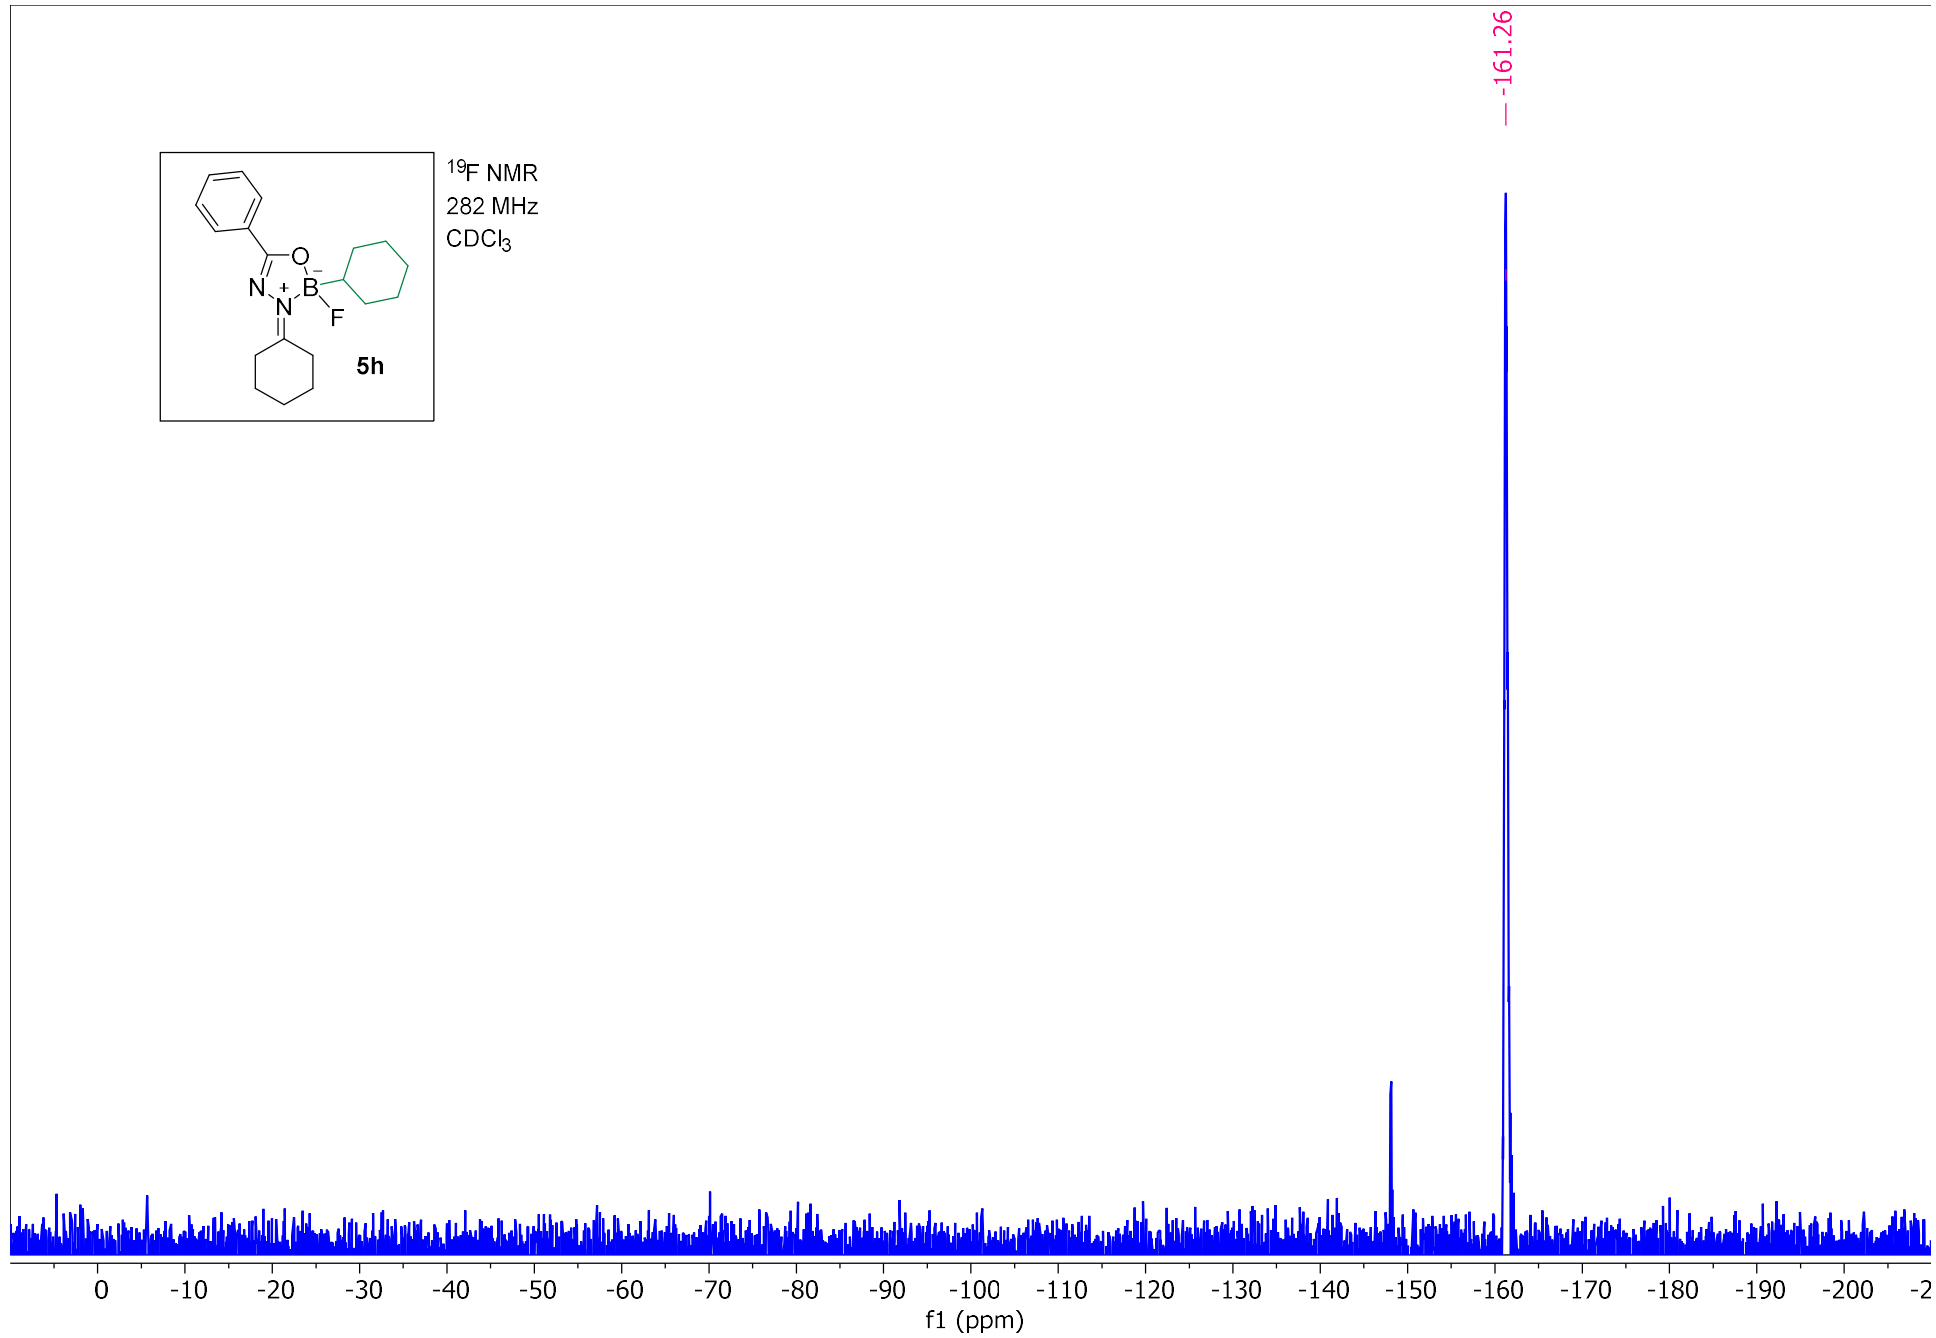

S157

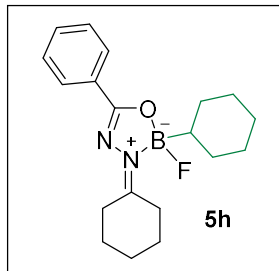

$^{11}\text{B}$  NMR  
96 MHz  
 $\text{CDCl}_3$

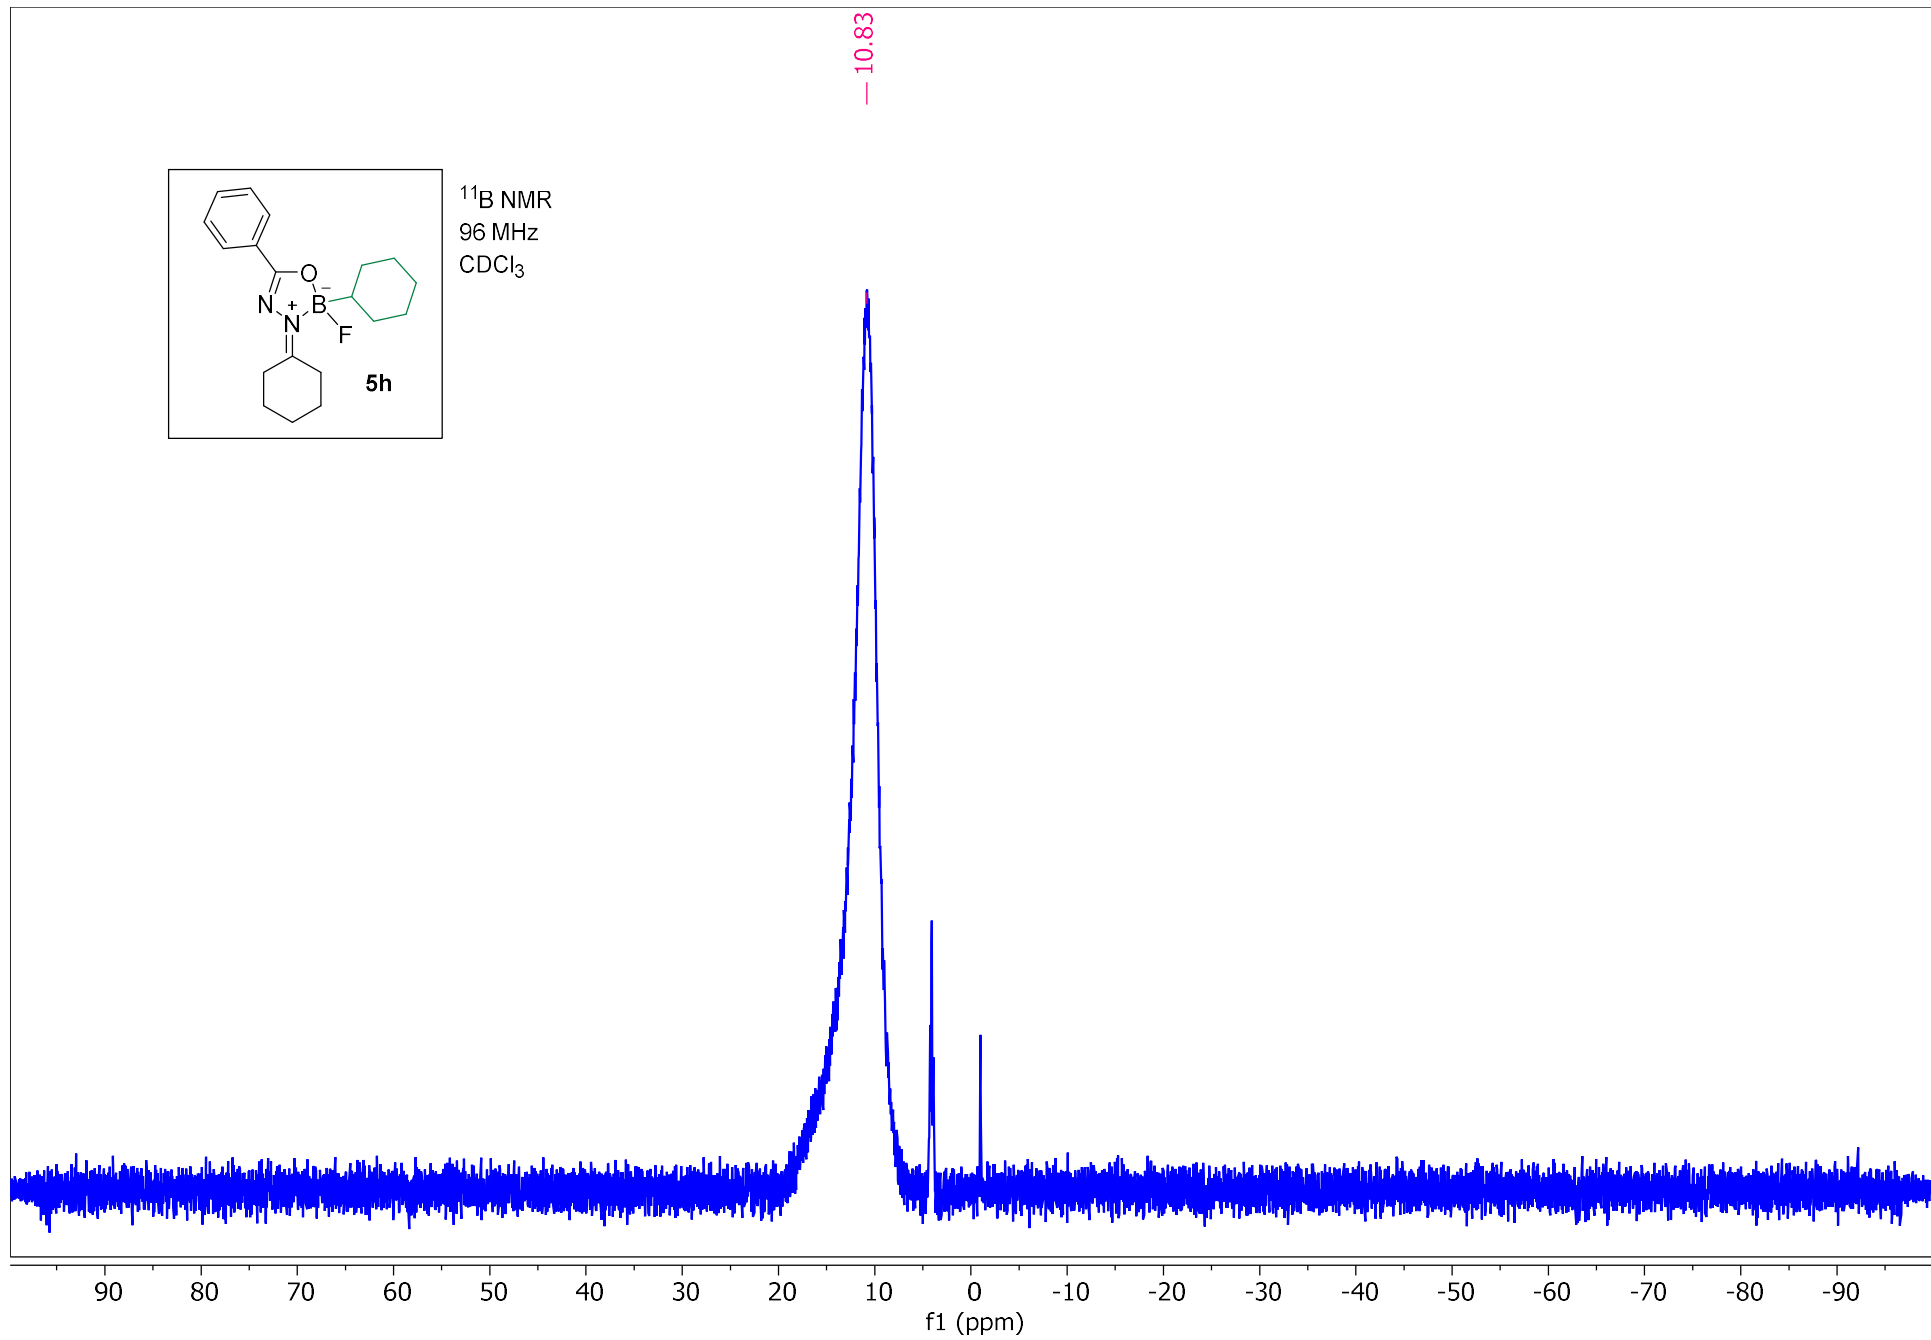

S158
